# Supplementary material
Source: publisher figshare collection journal article supplement (https://gsajournals.figshare.com/ndownloader/files/26610290)
Supplement: Supplementary file 1 [file 26610290]

## Sheet: Legend
Dataset S2 (separate file). Differentially Expressed Genes (.xlsx workbook). Genes found to be differentially expressed (padj: < 0.01 & fold change > 2x) between two sequential lifestages or specific to each lifestage after TMM normalization. Each row represents a different gene, represented by its gene_id, LOC #, and gene name in the first three columns. The next 6-15 columns represent the norma…

## Sheet: DEGs_1vs2_sequential
gene_ID	LOC#	gene name	F1_1	F2_1	F3_1	F1_2	F2_2	F3_2	padj	log2FoldChange	pvalue	foldChange	log10padj
MSTRG.13624	LOC100164275	serine/threonine-protein kinase 32B-like	30.0675	79.8954	26.0809	0	0.218924	0.361105	2.47653e-05	-12.2315	9.85685e-10	0.000207941	4.60616
MSTRG.8669	LOC100163936	ATP-binding cassette sub-family C member 9-like	42.3396	63.341	27.0191	0	0.189573	0.310324	7.25501e-07	-12.1823	2.88757e-11	0.000215165	6.13936
MSTRG.7362	#N/A	#N/A	3739.05	3402.58	3754.99	2.42093	3.85323	28.2471	1.36846e-19	-12.0712	5.44662e-24	0.000232383	18.8638
MSTRG.18667	LOC100575914	myosin-IB-like	41.4594	36.8934	29.6092	0	0.274263	0.458661	9.9368e-07	-11.7549	3.95495e-11	0.000289343	6.00275
MSTRG.14912	#N/A	#N/A	26.8216	13.3861	66.5212	0	0.131993	0.212315	0.00390584	-11.743	1.55456e-07	0.000291742	2.40829
MSTRG.19913	LOC100162054	GTP-binding protein Rhes-like	20.691	49.926	26.701	0	0.14844	0.240762	0.00020836	-11.5506	8.29294e-09	0.000333364	3.68119
MSTRG.13098	LOC100161848	#N/A	36.0088	24.0782	37.344	0	0.124984	0.200732	1.55662e-05	-11.5275	6.19548e-10	0.000338759	4.80782
MSTRG.9381	LOC100166644	uncharacterized LOC100166644	27.0401	27.1055	22.9873	0	0.301412	0.507732	0.000389547	-11.0309	1.55043e-08	0.000477946	3.40944
MSTRG.1947	#N/A	#N/A	128.626	106.359	15.5165	2.48081	0.371923	0.630184	0.00119105	-9.6775	4.74048e-08	0.00122119	2.92407
MSTRG.10835	LOC100573764	uncharacterized LOC100573764	21.7084	61.5629	34.2339	1.69749	0.132148	0.212144	0.000270339	-9.23785	1.07598e-08	0.00165626	3.56809
MSTRG.12890	LOC100571266	uncharacterized LOC100571266	37.5399	39.8221	41.4467	2.49433	0.402077	0.686305	7.79302e-06	-8.13641	3.1017e-10	0.00355384	5.10829
MSTRG.6759	#N/A	#N/A	43.3677	48.236	51.035	2.58811	1.33618	1.56803	3.68952e-07	-7.2294	1.46846e-11	0.00666398	6.43303
MSTRG.5326	#N/A	#N/A	38.3985	58.8283	27.4605	0	2.55627	2.9533	0.00280619	-6.55007	1.11689e-07	0.0106717	2.55188
MSTRG.4546	LOC100144792	#N/A	366.058	627.338	659.039	12.6062	10.4989	65.7588	9.35455e-05	-6.07245	3.7232e-09	0.0148597	4.02898
MSTRG.22590	LOC100575867	uncharacterized LOC100575867	58.1424	83.5104	65.6867	4.35724	8.12619	0.530641	0.000804339	-5.85173	3.20135e-08	0.0173162	3.09456
MSTRG.10099	LOC100167322	organic cation transporter 1-like	172.228	195.144	104.69	19.1837	3.76157	6.69947	1.9966e-05	-5.84478	7.94665e-10	0.0173999	4.69971
MSTRG.4565	Catb-16d2	cathepsin B-16D2	3341.18	5744.6	5647.41	101.638	131.176	800.026	0.0085386	-5.51883	3.39845e-07	0.0218105	2.06861
MSTRG.6379	LOC100159243	feline leukemia virus subgroup C receptor-related protein 2-like	270.31	626.836	290.533	13.5411	24.8446	50.3635	3.42628e-06	-5.40149	1.36369e-10	0.0236586	5.46518
MSTRG.18150	LOC100162572	potassium channel subfamily K member 1-like	179.731	303.877	135.679	13.5654	11.5547	20.9169	3.58051e-09	-5.39915	1.42508e-13	0.0236971	8.44605
MSTRG.2677	LOC100163553	two pore potassium channel protein sup-9-like	248.727	376.003	231.24	13.5301	16.0532	37.6677	3.12859e-09	-5.30409	1.24521e-13	0.0253111	8.50465
MSTRG.18263	LOC100164534	BTB/POZ domain-containing protein KCTD8-like	597.524	971.853	780.43	54.3307	36.0017	96.8477	1.63592e-13	-5.2424	6.51111e-18	0.0264169	12.7862
MSTRG.19238	LOC100571910	agrin-like	132.083	265.247	186.595	8.92212	19.2884	22.1239	2.8855e-08	-5.10757	1.14846e-12	0.0290047	7.53978
MSTRG.20210	LOC100164409	CG2004-like	159.341	254.918	131.033	11.681	21.5985	16.3894	6.52163e-09	-5.00346	2.59567e-13	0.0311752	8.18564
MSTRG.1699	LOC115033669	#N/A	306.121	586.084	438.302	38.5645	29.3531	54.2844	1.22649e-12	-4.95662	4.88155e-17	0.032204	11.9113
MSTRG.17287	#N/A	#N/A	110.362	213.505	124.764	8.91636	11.595	22.2228	2.34404e-06	-4.9226	9.3295e-11	0.0329723	5.63004
MSTRG.2879	LOC100167910	sodium-dependent dopamine transporter-like	110.156	104.537	89.0741	17.3153	6.01172	6.74883	1.32623e-05	-4.85971	5.27853e-10	0.0344414	4.87738
MSTRG.16619	LOC100163311	uncharacterized LOC100163311	488.318	704.262	409.405	26.4971	53.705	78.0051	1.97708e-09	-4.80311	7.86896e-14	0.0358195	8.70398
MSTRG.17497	LOC100159222	choline O-acetyltransferase-like	265.377	525.154	201.724	34.8724	32.6389	31.7623	4.10068e-08	-4.77131	1.63211e-12	0.0366179	7.38714
MSTRG.6440	#N/A	#N/A	73.0514	188.67	76.2608	12.6181	7.18635	14.0297	0.00132316	-4.76664	5.26629e-08	0.0367366	2.87839
MSTRG.16852	LOC100163525	synapsin-like	991.536	1918.58	1152.79	99.7765	124.524	186.997	7.78292e-15	-4.74376	3.09768e-19	0.0373239	14.1089
MSTRG.11033	LOC100163246	trehalase-like	83.7105	84.7718	70.5007	11.8806	4.71734	8.68297	2.00754e-05	-4.74136	7.99022e-10	0.0373859	4.69734
MSTRG.15715	LOC100167874	glutamate [NMDA] receptor subunit epsilon-2-like	109.183	192.484	107.273	11.7186	7.12421	23.2509	6.36361e-05	-4.72886	2.53278e-09	0.0377112	4.1963
MSTRG.19073	LOC100161203	equilibrative nucleoside transporter 4-like	161.361	338.292	257.984	32.1087	27.0864	22.2615	4.63654e-09	-4.64307	1.84539e-13	0.0400218	8.33381
MSTRG.6507	LOC100161933	uncharacterized LOC100161933	638.145	1404.22	845.745	43.1936	93.4599	175.838	3.32111e-05	-4.61492	1.32183e-09	0.0408105	4.47872
MSTRG.6410	LOC100165947	neuronal growth regulator 1-like	69.3797	58.9378	77.4377	7.17429	10.235	5.30503	3.71767e-05	-4.61376	1.47967e-09	0.0408432	4.42973
MSTRG.8824	LOC100159868	carbonic anhydrase-related protein 10-like	263.343	527.711	247.382	43.2279	21.5921	50.6567	3.13573e-06	-4.56409	1.24805e-10	0.042274	5.50366
MSTRG.7265	LOC100163370	major facilitator superfamily domain-containing protein 6-A-like	1271.57	2103.56	1235.22	170.309	105.72	235.469	5.36745e-13	-4.55056	2.1363e-17	0.0426721	12.2702
MSTRG.17289	LOC100164384	FCH and double SH3 domains protein 2-like	247.853	539.745	351.464	52.5004	39.3002	35.3625	1.72177e-09	-4.5444	6.85282e-14	0.0428547	8.76402
MSTRG.17767	#N/A	#N/A	59.2334	116.702	114.929	8.98957	7.0328	17.0786	0.000478076	-4.51042	1.90279e-08	0.0438762	3.3205
MSTRG.21736	#N/A	#N/A	266.527	493.45	257.863	35.7885	16.0619	63.6864	0.000264962	-4.50884	1.05458e-08	0.0439241	3.57682
MSTRG.17494	LOC100169284	high-affinity choline transporter 1-like	298.331	391.469	232.783	50.7303	23.7507	29.2867	1.17696e-08	-4.49608	4.68442e-13	0.0443145	7.92924
MSTRG.20968	LOC100168523	uncharacterized LOC100168523	99.9272	223.071	91.7186	12.6348	11.5774	24.5153	0.00183521	-4.44111	7.30432e-08	0.0460353	2.73631
MSTRG.8910	LOC100168045	uncharacterized LOC100168045	203.878	390.36	237.301	17.2515	30.3673	51.5856	1.56372e-05	-4.43343	6.22377e-10	0.0462811	4.80584
MSTRG.15348	LOC100165018	calbindin-32-like	937.178	1797.13	1381.68	139.703	107.904	236.43	1.56733e-11	-4.4271	6.23812e-16	0.0464847	10.8048
MSTRG.6476	LOC100166732	possible pseudogene or miscRNA, No KEGG entry	899.512	2295.64	1127.89	124.872	107.862	278.599	8.57732e-06	-4.42295	3.41386e-10	0.0466186	5.06665
MSTRG.6175	LOC100168428	Kv channel-interacting protein 4-like	69.4325	106.102	78.7344	11.8328	13.5148	5.32058	0.000267035	-4.41141	1.06283e-08	0.046993	3.57343
MSTRG.10715	LOC100168087	ly6/PLAUR domain-containing protein 6B-like	108.184	211.537	176.164	21.0111	6.01586	32.609	0.0098628	-4.39438	3.92549e-07	0.0475509	2.006
MSTRG.4863	#N/A	#N/A	98.8625	146.136	88.2549	8.92879	20.4138	11.5492	5.40716e-05	-4.39127	2.1521e-09	0.0476536	4.26703
MSTRG.8182	LOC100160756	#N/A	1109.26	2418.13	1381.1	185.149	165.446	252.092	6.11617e-13	-4.33797	2.4343e-17	0.049447	12.2135
MSTRG.21083	LOC100570634	vacuolar protein sorting-associated protein 13C-like	558.36	1060.19	701.127	95.1435	76.9594	115.984	3.85093e-13	-4.31775	1.53271e-17	0.0501451	12.4144
MSTRG.1705	LOC100168602	uncharacterized LOC100168602	192.462	368.081	208.985	28.399	36.9814	31.6551	3.39307e-08	-4.28308	1.35048e-12	0.0513647	7.46941
MSTRG.15344	LOC100161526	vesicular inhibitory amino acid transporter-like	191.63	390.922	291.77	41.3712	22.702	47.1393	9.54602e-07	-4.25784	3.79941e-11	0.0522714	6.02018
MSTRG.46	LOC100163607	uncharacterized LOC100163607	612.059	1016.65	754.041	84.0462	102.271	118.047	1.27891e-16	-4.2563	5.0902e-21	0.052327	15.8932
MSTRG.10339	#N/A	#N/A	142.536	182.311	91.9271	27.4958	16.0268	10.3944	0.000775172	-4.23439	3.08526e-08	0.0531277	3.1106
MSTRG.24585	LOC100575246	c3 and PZP-like alpha-2-macroglobulin domain-containing protein 8-like	677.928	1239.53	985.335	93.2968	116.73	166.698	6.54281e-13	-4.22355	2.6041e-17	0.0535284	12.1842
MSTRG.8180	LOC100571068	acetylcholine receptor subunit alpha-like 1-like	466.011	616.281	628.581	33.0079	60.2114	132.797	8.5452e-05	-4.20928	3.40107e-09	0.0540606	4.06828
MSTRG.7640	LOC100160727	uncharacterized LOC100160727	1709.91	3255.02	2215.76	245.492	216.272	488.334	5.78963e-10	-4.18383	2.30433e-14	0.0550228	9.23735
MSTRG.10176	LOC100160151	dipeptidase 1-like	86.1615	175.308	80.5904	14.5688	8.14976	22.9088	0.00958641	-4.16538	3.81548e-07	0.0557308	2.01834
MSTRG.9962	LOC100167428	acetylcholine receptor subunit beta-like 1-like	502.117	1085.87	681.498	67.3069	97.9722	137.267	2.47234e-08	-4.16514	9.84017e-13	0.0557402	7.60689
MSTRG.17208	#N/A	#N/A	87.3272	129.86	70.9244	11.74	10.4254	17.3333	0.000194931	-4.14488	7.75846e-09	0.0565284	3.71012
MSTRG.1007	LOC100164836	pyridoxine/pyridoxamine 5'-phosphate oxidase-like	257.094	485.011	230.262	54.3846	27.1206	51.8288	1.99292e-05	-4.10989	7.93202e-10	0.0579162	4.70051
MSTRG.19714	#N/A	#N/A	69.7728	89.1238	73.3858	9.87104	4.91792	17.4568	0.00286577	-4.10481	1.14061e-07	0.0581203	2.54276
MSTRG.19400	LOC100166552	possible pseudogene or miscRNA, No KEGG entry	338.329	512.94	307.109	62.7156	22.7118	76.6983	0.000150826	-4.0596	6.00304e-09	0.0599708	3.82152
MSTRG.21269	LOC100161312	opsin, ultraviolet-sensitive-like	126.68	168.541	131.608	21.9843	9.30294	30.074	0.000277784	-4.04187	1.10561e-08	0.0607122	3.55629
MSTRG.21942	LOC100168170	transmembrane and TPR repeat-containing protein CG4341-like	474.82	788.756	567.122	60.8252	59.2312	140.569	1.35889e-06	-4.04149	5.40852e-11	0.0607282	5.86682
MSTRG.8512	LOC100160678	guanylate cyclase soluble subunit beta-1-like	277.984	584.388	469.788	24.6497	71.2868	96.6151	0.00264253	-4.01029	1.05175e-07	0.0620557	2.57798
MSTRG.13306	LOC100158789	uncharacterized protein LOC100158789	782.857	773.058	322.528	66.4634	53.5894	152.639	0.00187068	-3.98919	7.44549e-08	0.0629702	2.728
MSTRG.4975	LOC100166244	uncharacterized LOC100166244	654.946	1270.41	899.099	119.305	102.341	189.017	9.1697e-10	-3.98506	3.64963e-14	0.0631504	9.03764
MSTRG.2589	LOC100575399	uncharacterized LOC100575399	171.816	367.948	237.931	33.9528	31.527	49.4268	4.49006e-06	-3.98087	1.78709e-10	0.0633341	5.34775
MSTRG.14903	LOC100165341	uncharacterized LOC100165341	172.402	236.832	152.367	15.4331	33.505	34.862	1.80397e-05	-3.97502	7.17999e-10	0.0635915	4.74377
MSTRG.9296	LOC100160524	glutamate [NMDA] receptor subunit 1-like	741.416	1271.16	818.404	126.718	91.3145	197.411	3.71019e-09	-3.97056	1.47669e-13	0.0637885	8.4306
MSTRG.21473	LOC100165542	protein tipE-like	87.4433	172.645	159.244	26.6035	10.4533	24.448	0.00321892	-3.9669	1.28116e-07	0.0639504	2.49229
MSTRG.17827	#N/A	#N/A	248.038	431.173	207.221	44.1293	48.1923	38.9701	6.63452e-07	-3.95997	2.64061e-11	0.0642584	6.17819
MSTRG.7482	LOC100569159	insulin-like growth factor-binding protein complex acid labile subunit-like	127.197	335.201	174.621	43.228	21.6088	29.4624	0.00291137	-3.95159	1.15875e-07	0.0646326	2.5359
MSTRG.10330	#N/A	#N/A	120.603	205.868	133.257	14.5026	14.8595	39.5766	0.00591334	-3.94656	2.35357e-07	0.0648587	2.22817
MSTRG.19486	LOC100168701	CUE domain-containing protein 1-like	246.591	366.672	229.901	36.7433	43.6479	45.8646	1.82296e-09	-3.94062	7.25556e-14	0.0651259	8.73922
MSTRG.15554	LOC100163727	Down syndrome cell adhesion molecule-like protein CG42256-like	134.167	144.094	81.5835	12.6333	21.5325	19.8452	8.14235e-05	-3.93773	3.24074e-09	0.0652568	4.08925
MSTRG.13150	LOC100169176	synaptogyrin-2-like	509.333	1015.41	423.707	102.582	44.8659	141.953	0.00225369	-3.93754	8.96992e-08	0.0652653	2.64711
MSTRG.2789	LOC100569264	uncharacterized LOC100569264	71.7968	121.012	86.681	10.8096	14.8372	16.1681	0.000167917	-3.93312	6.68328e-09	0.0654654	3.7749
MSTRG.5718	LOC100568735	uncharacterized LOC100568735	133.682	152.073	92.8279	22.0502	12.5264	22.8604	6.4293e-05	-3.92891	2.55892e-09	0.0656568	4.19184
MSTRG.10287	#N/A	#N/A	82.7789	95.9726	107.222	14.6638	8.02396	20.1532	0.000297522	-3.92379	1.18417e-08	0.0658901	3.52648
MSTRG.7399	LOC100158875	protein KBP homolog	307.319	529.972	281.475	56.1883	41.5461	70.958	3.6931e-07	-3.91371	1.46989e-11	0.0663525	6.43261
MSTRG.3464	LOC100165959	uncharacterized LOC100165959	283.225	575.784	429.058	52.4959	59.1785	89.6325	4.16044e-07	-3.85152	1.65589e-11	0.0692751	6.38086
MSTRG.3176	LOC100167562	neuroendocrine convertase 2-like	1079.92	2108.36	1366.41	238.096	148.823	321.612	1.62914e-08	-3.84545	6.48413e-13	0.069567	7.78804
MSTRG.14183	LOC100159916	muscarinic acetylcholine receptor M3-like	181.849	238.5	193.356	23.7894	29.1772	43.1393	2.02957e-07	-3.83712	8.07789e-12	0.0699701	6.6926
MSTRG.18148	LOC100165386	uncharacterized LOC100165386	246.988	464.808	323.888	30.2091	58.1517	74.5355	3.14454e-05	-3.83032	1.25156e-09	0.0703003	4.50244
MSTRG.2905	LOC100161496	uncharacterized LOC100161496	609.461	1155.69	772.566	112.769	119.005	168.116	1.44149e-10	-3.82122	5.73727e-15	0.0707453	9.84119
MSTRG.13526	LOC100572071	uncharacterized LOC100572071	145.553	312.861	242.893	23.7919	25.8659	61.6731	0.00578019	-3.80613	2.30057e-07	0.0714891	2.23806
MSTRG.17852	LOC100163627	uncharacterized protein CG3556-like	1109.33	2496.64	1800.83	213.912	226.272	418.914	1.77038e-07	-3.8027	7.0463e-12	0.0716593	6.75193
MSTRG.17660	LOC100159367	hemicentin-2-like	139.231	172.441	130.927	32.2103	14.8532	23.2279	2.94041e-05	-3.79857	1.17031e-09	0.0718648	4.53159
MSTRG.21018	LOC100159346	15-hydroxyprostaglandin dehydrogenase [NAD+]-like	220.897	353.92	198.963	21.8666	33.7989	69.7789	0.00473667	-3.76919	1.88524e-07	0.0733435	2.32453
MSTRG.11426	LOC100574568	uncharacterized LOC100574568	82.2569	122.638	126.572	12.644	22.6018	18.617	0.000131408	-3.76349	5.23018e-09	0.0736337	3.88138
MSTRG.15293	LOC100166378	diencephalon/mesencephalon homeobox protein 1-B-like	62.5184	120.243	84.6586	13.5863	13.7739	17.4233	0.00232563	-3.73617	9.25624e-08	0.0750412	2.63346
MSTRG.1355	LOC100165865	teneurin-3-like	494.891	1045.9	476.793	84.0083	95.7723	152.722	2.54692e-05	-3.72757	1.0137e-09	0.07549	4.59398
MSTRG.7475	LOC100162251	membrane metallo-endopeptidase-like 1-like	101.872	166.58	116.05	23.8382	19.2297	20.8387	3.63438e-05	-3.71757	1.44652e-09	0.0760152	4.43957
MSTRG.16382	LOC100164620	sodium channel protein para-like	349.894	611.499	377.149	62.6942	39.3201	120.445	0.00122507	-3.71295	4.87591e-08	0.0762588	2.91184
MSTRG.19022	LOC100163644	uncharacterized WD repeat-containing protein alr3466-like	130.666	146.844	172.351	30.4458	33.2651	11.3195	0.00272221	-3.71016	1.08347e-07	0.0764066	2.56508
MSTRG.8125	LOC100162090	peptidyl-alpha-hydroxyglycine alpha-amidating lyase 2-like	1012.16	1659.94	1063.84	219.546	126.704	276.648	1.65755e-08	-3.69926	6.5972e-13	0.0769861	7.78053
MSTRG.10292	LOC100159332	bifunctional enzyme CarRP-like	2843.87	1955.44	3636.04	655.81	390.928	365.615	2.36004e-10	-3.67655	9.3932e-15	0.0782077	9.62708
MSTRG.8470	LOC100161843	lachesin-like	120.737	143.168	129.297	35.8798	16.025	15.1402	0.00192935	-3.66573	7.67901e-08	0.0787961	2.71459
MSTRG.18542	LOC100167885	cubilin-like	113.319	196.753	178.125	27.5494	18.142	37.1682	0.00035366	-3.65983	1.4076e-08	0.0791194	3.45141
MSTRG.10800	LOC100165374	beta-1,4-N-acetylgalactosaminyltransferase bre-4-like	338.793	324.308	496.499	42.3547	50.1358	106.311	0.000111196	-3.65612	4.4257e-09	0.0793226	3.95391
MSTRG.10114	LOC100164099	#N/A	1657.13	3282.39	2121.11	367.04	343.486	500.611	3.15543e-12	-3.64028	1.25589e-16	0.0801986	11.5009
MSTRG.9126	LOC100161000	endoplasmic reticulum aminopeptidase 2-like	1359.06	2168.13	1372.81	187.012	267.12	390.34	1.45366e-09	-3.63283	5.78573e-14	0.0806137	8.83754
MSTRG.952	LOC100158930	class E basic helix-loop-helix protein 22-like	157.441	230.158	183.032	35.7946	41.5543	21.1541	2.79119e-05	-3.63127	1.11092e-09	0.0807009	4.55421
MSTRG.10811	LOC100575343	uncharacterized LOC100575343	117.612	203.309	142.802	25.639	22.6303	32.7692	5.56756e-05	-3.62536	2.21595e-09	0.0810321	4.25433
MSTRG.10572	LOC100168829	regulator of G-protein signaling 17-like	236.5	405.652	217.235	41.3472	44.8631	65.0201	2.01876e-05	-3.59428	8.03486e-10	0.0827969	4.69492
MSTRG.23805	LOC103309243	#N/A	221.889	193.921	123.749	26.6489	30.1145	38.1142	3.09315e-05	-3.59177	1.23111e-09	0.0829408	4.5096
MSTRG.5228	#N/A	#N/A	204.187	110.716	152.634	20.1343	40.9641	21.8528	0.00226278	-3.59122	9.0061e-08	0.0829725	2.64536
MSTRG.10826	LOC100573884	uncharacterized LOC100573884	198.571	251.352	197.227	38.6605	36.9293	38.6083	1.25396e-08	-3.58992	4.99088e-13	0.0830476	7.90172
MSTRG.16232	LOC100166986	nucleoredoxin-like	123.075	209.66	201.158	46.0097	28.266	19.9798	0.0023928	-3.57732	9.52359e-08	0.0837759	2.62109
MSTRG.16673	LOC100160452	uncharacterized LOC100160452	184.065	280.454	176.927	35.8621	41.3374	37.458	1.27857e-06	-3.57348	5.08885e-11	0.0839994	5.89327
MSTRG.18358	#N/A	#N/A	372.554	691.874	495.839	83.1824	74.5668	120.028	1.86413e-07	-3.56568	7.41942e-12	0.0844544	6.72952
MSTRG.156	LOC100164607	transmembrane channel-like protein 7-like	107.38	186.511	135.587	20.9584	35.9889	19.965	0.000974511	-3.56464	3.87865e-08	0.0845154	3.01121
MSTRG.10609	LOC100163958	cationic amino acid transporter 4-like	616.519	1117.85	507.211	120.221	111.213	170.273	2.76928e-06	-3.54908	1.1022e-10	0.0854322	5.55763
MSTRG.17704	LOC100162309	neuronal acetylcholine receptor subunit alpha-7-like	164.357	302.791	184.869	55.4255	29.2413	32.7712	0.000829352	-3.54907	3.3009e-08	0.0854327	3.08126
MSTRG.15365	LOC100163315	BAI1-associated protein 3-like	189.258	281.59	184.867	32.1372	46.8313	38.6311	2.18717e-06	-3.54889	8.70515e-11	0.0854432	5.66012
MSTRG.16815	LOC100160593	prohormone-4-like	522.701	859.867	419.825	110.038	68.0784	146.5	6.02311e-05	-3.54753	2.39726e-09	0.0855241	4.22018
MSTRG.21087	LOC100571148	allatostatins-like	248.507	369.063	285.991	67.5004	46.8602	46.874	1.5001e-07	-3.54486	5.97054e-12	0.0856823	6.82388
MSTRG.5038	LOC100160201	alpha-(1,6)-fucosyltransferase-like	240.812	228.018	239.148	45.2574	21.4411	61.5105	0.000285315	-3.54425	1.13558e-08	0.0857183	3.54467
MSTRG.9665	LOC100161503	sodium- and chloride-dependent transporter XTRP3B-like	122.823	182.264	139.513	32.1483	29.2603	19.8606	5.50247e-05	-3.53006	2.19004e-09	0.0865659	4.25944
MSTRG.909	#N/A	#N/A	199.326	206.776	220.958	38.7376	22.5286	53.3672	4.13067e-05	-3.52817	1.64405e-09	0.0866794	4.38398
MSTRG.5719	LOC100569278	uncharacterized LOC100569278	152.364	173.266	104.191	17.3571	31.0883	30.9759	0.000603136	-3.51861	2.40054e-08	0.0872555	3.21958
MSTRG.627	LOC100574244	uncharacterized LOC100574244	1284.08	1913.99	1670.46	290.06	199.695	399.753	9.47185e-11	-3.51011	3.76989e-15	0.0877712	10.0236
MSTRG.15226	LOC100159895	uncharacterized LOC100159895	450.229	606.34	482.242	86.0359	93.1308	102.095	1.44925e-12	-3.5051	5.76816e-17	0.0880765	11.8389
MSTRG.19050	#N/A	#N/A	88.2913	119.427	155.75	27.629	18.049	20.674	0.000993847	-3.50445	3.95561e-08	0.0881161	3.00268
MSTRG.8148	LOC100575319	uncharacterized LOC100575319	150.813	196.608	147.336	22.8463	18.2152	50.3141	0.00829335	-3.50428	3.30083e-07	0.0881262	2.08127
MSTRG.23887	#N/A	#N/A	524.259	624.39	562.869	83.1876	92.1684	138.732	4.97063e-11	-3.50254	1.97836e-15	0.0882328	10.3036
MSTRG.16842	LOC100161200	uncharacterized LOC100161200	406.227	842.255	544.627	103.525	70.3012	154.845	0.000106649	-3.49819	4.24472e-09	0.0884991	3.97204
MSTRG.1783	LOC100569669	uncharacterized LOC100569669	92.1902	121.627	114.434	26.8137	10.261	23.7541	0.00949563	-3.48944	3.77935e-07	0.0890378	2.02248
MSTRG.1189	LOC100165533	sodium/potassium-transporting ATPase subunit beta-2-like	671.433	1003.62	868.595	187.165	135.401	148.752	1.48255e-12	-3.47544	5.90071e-17	0.0899058	11.829
MSTRG.15191	LOC100161382	RING finger protein 207-like	139.494	241.824	128.403	25.6167	33.6965	35.2182	0.000532934	-3.47262	2.12113e-08	0.0900817	3.27333
MSTRG.20339	LOC100166734	probable sodium/potassium/calcium exchanger CG1090-like	315.546	702.337	428.375	52.4831	97.841	120.369	0.00109762	-3.47173	4.36865e-08	0.0901375	2.95955
MSTRG.8925	LOC103310367	#N/A	2729.99	4633.42	3305.59	780.934	544.795	653.479	2.84929e-15	-3.47001	1.13405e-19	0.0902451	14.5453
MSTRG.13122	LOC100163170	uncharacterized LOC100163170	1047.69	2113.16	1411.25	281.726	216.244	352.373	7.41168e-09	-3.46996	2.94992e-13	0.0902481	8.13008
MSTRG.18349	LOC100166003	serpin B10-like	3697.7	3320.97	4419.06	741.898	544.862	841.855	9.68779e-21	-3.46543	3.85584e-25	0.090532	20.0138
MSTRG.20296	LOC100166529	rho GTPase-activating protein 100F-like	355.155	536.49	377.392	89.6187	68.0813	82.7474	7.43929e-09	-3.44036	2.96091e-13	0.0921187	8.12847
MSTRG.10657	LOC100163329	poly(rC)-binding protein 3-like	413.438	482.555	364.914	47.8329	74.7219	117.045	9.98493e-06	-3.43624	3.9741e-10	0.0923823	5.00065
MSTRG.7950	LOC100164778	uncharacterized protein KIAA0562-like	542.697	854.552	481.12	158.279	62.5747	133.728	0.000402555	-3.4361	1.60221e-08	0.0923911	3.39517
MSTRG.1188	#N/A	#N/A	1733.03	2766.59	2041.54	393.055	300.337	550.127	1.7416e-11	-3.42513	6.93176e-16	0.0930967	10.7591
MSTRG.6532	LOC100162406	uncharacterized LOC100162406	243.732	299.595	217.093	42.2821	53.7036	49.6167	5.73609e-08	-3.41905	2.28302e-12	0.0934898	7.24138
MSTRG.20646	LOC100162547	uncharacterized LOC100162547	412.98	552.174	645.406	80.4177	72.3105	154.971	1.40071e-05	-3.41783	5.57498e-10	0.093569	4.85365
MSTRG.18356	Cpx	complexin	1585.13	2345.14	1685	328.084	217.42	537.09	4.33172e-07	-3.39861	1.72407e-11	0.0948236	6.36334
MSTRG.20844	LOC100167229	uncharacterized LOC100167229	2581.17	4317.68	3038.86	524.753	633.305	764.85	3.05949e-15	-3.38915	1.21771e-19	0.0954471	14.5144
MSTRG.20848	LOC100569114	uncharacterized LOC100569114	1683.26	2939.69	2136.5	346.604	318.092	654.545	1.76943e-07	-3.37443	7.04251e-12	0.0964264	6.75217
MSTRG.18533	LOC100160352	two pore potassium channel protein sup-9-like	441.659	630.725	631.819	91.4461	104.589	139.575	2.12383e-09	-3.36063	8.45307e-14	0.0973529	8.67288
MSTRG.6362	LOC100167797	NACHT and WD repeat domain-containing protein 1-like	476.804	763.357	540.434	68.2626	190.484	92.101	0.0017741	-3.35791	7.06111e-08	0.0975369	2.75102
MSTRG.7625	LOC100169160	Down syndrome cell adhesion molecule-like protein CG42256-like	355.926	635.836	403.648	57.1525	110.922	107.141	5.80352e-05	-3.356	2.30986e-09	0.0976661	4.23631
MSTRG.10829	#N/A	#N/A	259.599	309.58	258.765	34.0339	57.6246	73.2457	1.63679e-05	-3.34891	6.5146e-10	0.0981469	4.78601
MSTRG.16280	LOC100165593	JNK-interacting protein 1-like	223.941	374.75	193.014	46.0005	52.5795	57.8607	7.96395e-05	-3.342	3.16973e-09	0.0986185	4.09887
MSTRG.17433	LOC100159502	uncharacterized LOC100159502	222.981	442.719	342.859	71.0596	49.2794	80.3584	9.95304e-05	-3.33729	3.96141e-09	0.0989406	4.00204
MSTRG.21578	LOC100167625	uncharacterized LOC100167625	96.6839	164.201	229.329	35.0457	35.6073	26.5968	0.00941434	-3.33626	3.747e-07	0.0990112	2.02621
MSTRG.9280	LOC100166656	prothoracicostatic peptide-like	401.728	808.999	697.717	95.2522	78.9948	206.905	0.00713015	-3.33356	2.83787e-07	0.0991969	2.1469
MSTRG.11545	LOC100167950	lipase-like	400.35	484.226	510.508	51.6135	97.5154	133.634	6.33741e-05	-3.30737	2.52235e-09	0.101014	4.19809
MSTRG.5937	LOC100569403	uncharacterized LOC100569403	320.049	278.353	394.37	74.0443	61.0881	65.4855	1.95274e-08	-3.3015	7.77211e-13	0.101426	7.70935
MSTRG.25167	LOC100574719	probable cytochrome P450 6a14-like	4877.07	11478.6	6883.87	1154.79	1209.6	2338.36	5.63919e-05	-3.3005	2.24445e-09	0.101497	4.24878
MSTRG.16856	LOC100573874	uncharacterized LOC100573874	162.147	236.236	211.377	44.2946	23.6788	55.918	0.00213546	-3.297	8.49936e-08	0.101743	2.67051
MSTRG.18149	LOC100167420	uncharacterized LOC100167420	227.436	203.926	184.269	47.0973	49.9872	27.9476	4.09469e-05	-3.29023	1.62973e-09	0.102221	4.38778
MSTRG.2935	LOC100169294	ras and EF-hand domain-containing protein homolog	332.678	378.344	483.519	83.3054	53.4772	106.5	6.10509e-06	-3.28282	2.42988e-10	0.102748	5.21431
MSTRG.5354	LOC100163602	receptor-type tyrosine-protein phosphatase N2-like	3109.05	4677.41	3595.67	703.898	562.477	1055.69	2.12416e-11	-3.27841	8.45439e-16	0.103063	10.6728
MSTRG.19112	LOC100574493	uncharacterized LOC100574493	317.771	407.415	256.455	40.4131	58.1542	102.98	0.00205364	-3.27771	8.17368e-08	0.103112	2.68748
MSTRG.13439	LOC100159750	uncharacterized protein LOC100159750	6006.55	5373.61	7344.61	1295.98	835.635	1691.24	7.37731e-12	-3.27371	2.93624e-16	0.103399	11.1321
MSTRG.10240	LOC100159010	uncharacterized LOC100159010	5453.39	5430.72	5785.39	1150.3	611.151	1673.27	2.90301e-07	-3.25601	1.15543e-11	0.104675	6.53715
MSTRG.17560	LOC100573715	uncharacterized LOC100573715	261.49	333.704	245.886	46.9148	51.507	74.5097	2.25069e-06	-3.25592	8.95798e-11	0.104681	5.64768
MSTRG.17994	LOC100163371	Down syndrome cell adhesion molecule-like protein CG42256-like	472.459	643.223	359.589	93.3814	63.589	153.126	0.00117898	-3.22238	4.69245e-08	0.107144	2.92849
MSTRG.14187	LOC100159613	circadian clock-controlled protein-like	2532.99	3422.07	3223.3	825.558	328.033	771.564	4.24149e-06	-3.21469	1.68816e-10	0.107716	5.37248
MSTRG.4210	LOC107884821	#N/A	230.626	299.78	345.797	75.0695	39.0428	70.9969	0.000136169	-3.21271	5.41965e-09	0.107865	3.86592
MSTRG.962	LOC100167823	sodium/hydrogen exchanger-like domain-containing protein 1-like	405.49	391.154	453.546	82.333	71.1241	111.383	1.16512e-08	-3.20885	4.63729e-13	0.108154	7.93363
MSTRG.18200	LOC100163798	leucomyosuppressin-like	109.139	208.717	139.713	38.7687	34.5547	25.4858	0.0072159	-3.17612	2.872e-07	0.110635	2.14171
MSTRG.21108	LOC100573104	uncharacterized LOC100573104	308.94	436.151	276.566	77.6694	55.7578	86.9233	1.03229e-05	-3.16836	4.10863e-10	0.111232	4.9862
MSTRG.18399	LOC100161568	uncharacterized LOC100161568	1511.4	3284.94	4535.24	607.437	531.41	868.383	0.000510237	-3.16732	2.03079e-08	0.111312	3.29223
MSTRG.7673	LOC100168922	uncharacterized LOC100168922	222.546	282.985	396.845	60.0518	44.651	90.0475	0.00125407	-3.15956	4.9913e-08	0.111913	2.90168
MSTRG.14913	#N/A	#N/A	196.278	213.661	218.949	37.7872	32.4193	67.3494	0.000560857	-3.15864	2.23227e-08	0.111984	3.25115
MSTRG.20472	LOC100573440	possible pseudogene or miscRNA, No KEGG entry	592.824	1344.44	726.828	175.875	167.675	233.232	5.33702e-05	-3.15532	2.12419e-09	0.112241	4.2727
MSTRG.21467	LOC100168594	neuroendocrine protein 7B2-like	462.31	832.428	543.005	131.421	142.026	126.364	2.51956e-07	-3.14527	1.00281e-11	0.113026	6.59868
MSTRG.10501	LOC100575917	short neuropeptide F-like	344.67	612.352	562.997	97.0725	77.9727	159.207	0.00043469	-3.13104	1.73011e-08	0.114147	3.36182
MSTRG.15785	LOC100161160	diuretic hormone class 2-like	293.378	446.295	335.698	66.4958	61.2654	110.353	8.15258e-05	-3.1175	3.24481e-09	0.115223	4.0887
MSTRG.21661	LOC100569786	RIMS-binding protein 2-like	628.065	936.902	702.099	119.279	130.033	257.838	0.000109729	-3.09249	4.36732e-09	0.117238	3.95968
MSTRG.7911	LOC100571170	hypertrehalosaemic prohormone-like	200.824	220.807	271.608	56.2993	45.8241	52.861	4.43539e-06	-3.08476	1.76533e-10	0.117868	5.35307
MSTRG.21289	LOC100169317	uncharacterized LOC100169317	6078.97	8391.15	9899.86	1983.52	1136.58	2328.75	5.05399e-08	-3.08356	2.01154e-12	0.117966	7.29637
MSTRG.12626	LOC100167984	ABC transporter G family member 23-like	653.709	647.767	983.685	164.873	113.321	234.678	1.8767e-05	-3.08344	7.46945e-10	0.117975	4.72661
MSTRG.5938	LOC100575231	peroxidase-like	275.404	316.165	377.246	66.5973	50.0994	101.512	0.000144582	-3.07971	5.75449e-09	0.118281	3.83989
MSTRG.24010	LOC100571631	uncharacterized LOC100571631	1495.03	1670.8	1915.96	370.951	187.442	587.866	0.000678638	-3.07041	2.70105e-08	0.119046	3.16836
MSTRG.16384	LOC100158802	sodium channel protein para-like	398.726	589.77	408.908	105.444	136.425	74.3726	3.11088e-05	-3.05865	1.23816e-09	0.120021	4.50712
MSTRG.16867	LOC100163089	diacylglycerol kinase theta-like	3287.56	5190.95	3543.52	930.24	699.754	1096.59	1.14304e-11	-3.05638	4.5494e-16	0.120209	10.9419
MSTRG.11965	LOC100160642	gamma-aminobutyric acid receptor subunit rho-3-like	130.9	171.014	259.91	51.8479	35.6297	39.3835	0.00980876	-3.05365	3.90398e-07	0.120437	2.00839
MSTRG.2142	LOC100166702	uncharacterized LOC100166702	5404.38	5345.73	4941.16	1146.61	764.814	1664.9	8.27969e-10	-3.04661	3.2954e-14	0.121026	9.08199
MSTRG.1936	LOC100574813	uncharacterized LOC100574813	1212.87	1626.22	1705.96	340.341	221.624	474.446	4.04723e-07	-3.04595	1.61084e-11	0.121081	6.39284
MSTRG.19804	LOC100164469	lachesin-like	181.941	251.221	139.433	44.2613	43.5077	44.434	0.00105658	-3.02067	4.20531e-08	0.123222	2.9761
MSTRG.17275	LOC100160187	uncharacterized protein ZK1073.1-like	2268.69	3859.57	2789.76	770.711	521.603	763.612	3.27411e-10	-3.01987	1.30313e-14	0.123291	9.48491
MSTRG.19713	LOC100169520	calcium-activated potassium channel slowpoke-like	715.441	1080.88	895.232	242.797	146.578	237.607	2.70888e-07	-2.99924	1.07816e-11	0.125066	6.56721
MSTRG.13791	LOC100166623	amyloid beta A4 precursor protein-binding family B member 2-like	543.763	984.417	494.927	178.698	114.564	181.049	0.000554963	-2.99005	2.20881e-08	0.125865	3.25574
MSTRG.13423	LOC100575477	uncharacterized LOC100575477	474.152	522.557	398.322	93.4736	122.824	111.514	2.36808e-08	-2.98315	9.42521e-13	0.126468	7.6256
MSTRG.7390	LOC100162450	uncharacterized LOC100162450	3728.63	4951.7	5236.22	871.909	560.238	1850.2	0.00690728	-2.97947	2.74917e-07	0.126791	2.16069
MSTRG.15450	LOC100573127	uncharacterized LOC100573127	124.616	141.997	123.774	31.32	24.6801	37.0373	0.00112549	-2.97826	4.47955e-08	0.126898	2.94866
MSTRG.9720	LOC100158826	uncharacterized LOC100158826	1980.23	3822.41	2334.51	437.525	480.699	1010.99	0.00181549	-2.97254	7.22582e-08	0.127402	2.74101
MSTRG.21533	LOC100161839	potassium voltage-gated channel protein eag-like	373.908	677.305	532.857	91.4674	146.481	144.124	0.00011952	-2.93288	4.75702e-09	0.130953	3.92256
MSTRG.18376	LOC100167247	ras-related protein Rab-3-like	1221.77	2125.05	1196.89	308.59	294.818	496.968	1.71829e-05	-2.92298	6.83896e-10	0.131854	4.7649
MSTRG.12218	LOC100568501	uncharacterized LOC100568501	118.427	134.359	108.132	28.5096	32.3676	27.8143	0.00149685	-2.90844	5.9576e-08	0.133191	2.82482
MSTRG.14917	LOC100572916	uncharacterized LOC100572916	200.337	233.27	208.486	56.4965	33.4628	68.3083	0.00262908	-2.90424	1.0464e-07	0.133579	2.5802
MSTRG.989	LOC100569451	uncharacterized LOC100569451	356.191	294.338	260.836	73.8358	72.524	78.0647	1.98675e-06	-2.89379	7.90747e-11	0.13455	5.70186
MSTRG.18316	LOC100161889	phosphatidylinositol-4-phosphate 5-kinase type-1 beta-like	467.111	514.451	734.669	155.759	96.5692	169.19	8.57812e-05	-2.88801	3.41418e-09	0.13509	4.06661
MSTRG.12181	LOC100160997	possible pseudogene or miscRNA, No KEGG entry	839.318	1386.56	997.161	244.642	285.722	263.573	3.34165e-09	-2.88598	1.33001e-13	0.13528	8.47604
MSTRG.22627	LOC100158708	lactase-phlorizin hydrolase-like	463.358	279.781	265.702	83.3304	72.118	93.5949	0.000450123	-2.88585	1.79153e-08	0.135292	3.34667
MSTRG.5942	LOC103309259	#N/A	948.183	1088.19	1249.05	245.701	199.371	365.326	1.16535e-07	-2.88406	4.63822e-12	0.13546	6.93354
MSTRG.8602	#N/A	#N/A	381.581	354.12	513.548	116.805	63.4136	128.842	0.0011042	-2.87443	4.39483e-08	0.136367	2.95695
MSTRG.23155	LOC100570968	aminopeptidase N-like	256.695	346.084	380.434	110.463	50.0747	82.8305	0.00812394	-2.87415	3.23341e-07	0.136394	2.09023
MSTRG.2079	LOC100161348	adenylate kinase isoenzyme 1-like	7846.79	3648.68	4422.42	1055.59	853.345	2039.15	0.00918549	-2.87318	3.65592e-07	0.136485	2.0369
MSTRG.9812	LOC100168671	trehalase-like	405.455	431.275	476.076	108.423	61.2074	157.962	0.00526161	-2.86113	2.09417e-07	0.13763	2.27888
MSTRG.6833	#N/A	#N/A	405.637	461.09	583.65	130.702	66.7787	165.355	0.00716269	-2.8535	2.85082e-07	0.13836	2.14492
MSTRG.13900	N-syb	n-synaptobrevin	739.567	1163.25	891.525	196.307	207.447	300.542	5.06695e-07	-2.84214	2.0167e-11	0.139454	6.29525
MSTRG.4325	LOC100302487	uncharacterized LOC100302487	231.71	286.636	361.854	80.6468	64.2561	76.8762	8.21956e-05	-2.83764	3.27147e-09	0.139889	4.08515
MSTRG.19113	LOC100167028	bacitracin synthase 3-like	1045.53	1242.83	1630.64	267.818	335.504	390.063	2.88816e-09	-2.82553	1.14952e-13	0.141068	8.53938
MSTRG.7920	LOC100167374	PDGF- and VEGF-related factor 1-like	382.86	476.099	338.468	135.321	60.2189	108.215	0.00608261	-2.8253	2.42094e-07	0.141092	2.21591
MSTRG.6539	LOC100572781	carbonic anhydrase 7-like	611.83	787.139	760.953	179.848	102.176	265.763	0.00253903	-2.82494	1.01056e-07	0.141126	2.59533
MSTRG.17083	LOC100571776	uncharacterized LOC100571776	595.298	904.509	938.162	265.374	187.051	169.666	1.16136e-05	-2.80477	4.62234e-10	0.143113	4.93503
MSTRG.3414	LOC100569593	uncharacterized LOC100569593	1560.91	2303.91	2339.82	578.89	362.043	645.109	2.23179e-07	-2.80452	8.88275e-12	0.143138	6.65135
MSTRG.2864	LOC100165139	uncharacterized LOC100165139	538.274	821.31	572.805	190.888	137.623	170.002	3.30845e-06	-2.78724	1.3168e-10	0.144863	5.48037
MSTRG.10290	LOC100161104	bifunctional enzyme CarRP-like	6997.31	6487.05	8072.08	2076.44	1833.03	1721.22	6.1425e-21	-2.75664	2.44478e-25	0.147968	20.2117
MSTRG.18729	LOC100163038	uncharacterized LOC100163038	423.666	523.323	469.292	135.2	123.175	113.243	1.35847e-07	-2.75394	5.40684e-12	0.148245	6.86695
MSTRG.8882	LOC100162151	calmodulin-like	516.609	885.578	627.316	157.368	213.943	160.822	2.07888e-05	-2.75369	8.27415e-10	0.148271	4.68217
MSTRG.9452	LOC100167995	uncharacterized LOC100167995	6738.93	10297.2	6727.75	1528.64	1577.04	3149.47	8.75268e-05	-2.7522	3.48365e-09	0.148424	4.05786
MSTRG.21484	LOC100568742	uncharacterized LOC100568742	214.509	270.922	246.311	76.6999	63.5744	51.8828	0.000281986	-2.74686	1.12233e-08	0.148975	3.54977
MSTRG.10279	LOC100167646	uncharacterized LOC100167646	450.751	402.062	458.09	118.449	91.2301	135.712	1.64158e-06	-2.7453	6.53367e-11	0.149136	5.78474
MSTRG.8706	LOC100165393	uncharacterized LOC100165393	10206.1	11626.3	16368.3	3043.13	1976.14	5061.61	0.000741923	-2.74232	2.95293e-08	0.149445	3.12964
MSTRG.19049	LOC100161929	prolyl 4-hydroxylase subunit alpha-2-like	959.858	1058.76	1206.77	264.209	200.604	403.534	1.24137e-05	-2.70223	4.94076e-10	0.153656	4.9061
MSTRG.13675	LOC100164406	voltage-dependent calcium channel type A subunit alpha-1-like	435.303	614.317	515.788	142.558	123.31	158.302	1.62299e-06	-2.69189	6.45965e-11	0.154761	5.78968
MSTRG.21990	LOC100159160	uncharacterized LOC100159160	1950.38	1977.27	2839.84	587.183	405.194	841.364	1.71313e-05	-2.68688	6.81842e-10	0.155299	4.76621
MSTRG.21421	LOC100568675	nose resistant to fluoxetine protein 6-like	1063.9	1264.88	1276.45	421.262	179.623	378.738	0.000920534	-2.67436	3.66382e-08	0.156653	3.03596
MSTRG.8830	LOC100574565	uncharacterized LOC100574565	474.497	595.739	677.254	133.381	158.278	185.824	2.01727e-06	-2.66715	8.02895e-11	0.157437	5.69524
MSTRG.7229	LOC100160663	5'-nucleotidase	250.515	281.651	335.472	59.1368	98.3343	80.6232	0.000842862	-2.66426	3.35468e-08	0.157753	3.07424
MSTRG.19207	LOC100159939	uncharacterized LOC100159939	14568.2	23722.2	29987.7	6674.7	3730.69	8277.2	0.0027136	-2.66351	1.08004e-07	0.157836	2.56645
MSTRG.12672	#N/A	#N/A	315.633	407.052	331.742	84.0452	90.2013	114.699	2.77788e-05	-2.66329	1.10562e-09	0.15786	4.55629
MSTRG.21989	LOC100160554	uncharacterized LOC100160554	814.831	884.794	947.868	211.379	166.193	350.78	0.000134244	-2.65668	5.34303e-09	0.158585	3.87211
MSTRG.13064	LOC100573528	uncharacterized LOC100573528	172.456	269.181	245.993	61.1257	55.3758	73.0993	0.00339289	-2.65375	1.3504e-07	0.158907	2.46943
MSTRG.15001	LOC100163944	uncharacterized LOC100163944	1992.21	2146.22	2510.94	438.561	572.123	822.927	3.52308e-08	-2.6535	1.40222e-12	0.158933	7.45308
MSTRG.8707	LOC100167427	uncharacterized LOC100167427	14243.8	14746.3	21603.9	4098.99	2763.77	7101.35	0.00189039	-2.64935	7.52396e-08	0.159391	2.72345
MSTRG.17070	LOC100161691	adenine nucleotide translocator-like	7082.32	6418	8351.47	2220.03	1693.03	2107.97	3.05999e-16	-2.64641	1.21791e-20	0.159717	15.5143
MSTRG.19201	LOC100164578	octopamine receptor 1-like	518.433	527.227	478.908	172.334	108.911	139.312	8.7606e-06	-2.64361	3.4868e-10	0.160027	5.05747
MSTRG.2336	LOC100573274	venom dipeptidyl peptidase 4-like	298.544	375.611	341.263	121.446	62.3513	97.4298	0.00395519	-2.63667	1.57421e-07	0.160798	2.40283
MSTRG.19440	LOC100572792	uncharacterized LOC100572792	620.218	702.028	966.453	178.891	148.48	314.013	0.00612738	-2.61573	2.43876e-07	0.16315	2.21272
MSTRG.1017	Qvr	quiver	374.79	610.968	464.703	120.325	109.937	177.925	0.00141851	-2.61156	5.64581e-08	0.163622	2.84817
MSTRG.8446	LOC100158673	glucose dehydrogenase [acceptor]-like	485.773	510.907	717.36	151.124	128.438	204.197	0.000154502	-2.60633	6.14932e-09	0.164216	3.81107
MSTRG.8578	#N/A	#N/A	17969.1	18328.8	28536.8	5975.14	3525.97	8931.52	0.00387429	-2.58553	1.54201e-07	0.166601	2.41181
MSTRG.13063	LOC100161264	aminopeptidase N-like	932.619	980.274	1256.1	278.219	275.468	347.772	4.01276e-09	-2.58516	1.59712e-13	0.166644	8.39656
MSTRG.882	LOC100573861	uncharacterized LOC100573861	2874.43	2904.12	4371.25	1001.99	529.182	1364.74	0.00685477	-2.57766	2.72827e-07	0.167512	2.16401
MSTRG.19052	LOC100165503	prolyl 4-hydroxylase subunit alpha-2-like	1768.08	1847.02	2050.31	519.441	338.868	762.026	5.16322e-05	-2.57521	2.05501e-09	0.167797	4.28708
MSTRG.21819	LOC100162171	uncharacterized LOC100162171	563.047	722.358	867.389	224.457	127.563	269.5	0.00632767	-2.55324	2.51848e-07	0.170372	2.19876
MSTRG.20195	LOC100158867	glucose dehydrogenase [acceptor]-like	8055.01	11507.6	10868.2	2499.42	1887.55	4426.48	0.000537173	-2.5504	2.138e-08	0.170708	3.26989
MSTRG.512	LOC100167149	uncharacterized LOC100167149	204.01	263.659	250.376	77.6822	59.0784	71.7295	0.00139151	-2.54541	5.53836e-08	0.1713	2.85651
MSTRG.4568	Catb-912	cathepsin B-912	2466.01	2414.18	2267.27	555.517	649.515	876.251	2.26914e-11	-2.53895	9.03142e-16	0.172068	10.6441
MSTRG.8234	LOC100159898	possible pseudogene or miscRNA, No KEGG entry	1108.26	2214.05	1362.95	495.202	318.011	553.631	0.00341706	-2.53282	1.36003e-07	0.1728	2.46635
MSTRG.19437	LOC100572954	uncharacterized LOC100572954	676.479	748.551	1068.57	223.483	165.07	341.294	0.00587413	-2.53046	2.33796e-07	0.173084	2.23106
MSTRG.6821	LOC100159280	uncharacterized LOC100159280	1021.85	1549	1313.73	341.086	383.25	413.02	1.19878e-08	-2.52488	4.77128e-13	0.173754	7.92126
MSTRG.4309	LOC100573042	uncharacterized LOC100573042	927.424	954.396	1317.8	341.426	228.067	366.603	1.26209e-05	-2.52453	5.02324e-10	0.173796	4.89891
MSTRG.20473	LOC100159632	uncharacterized LOC100159632	8193.5	11188.5	10287.5	2470.66	1945.03	4289.09	9.8355e-05	-2.5233	3.91463e-09	0.173945	4.0072
MSTRG.20736	LOC100159932	uncharacterized protein LOC100159932	5480.82	6190.53	7948.93	1501.97	1201.68	3062.76	0.00965203	-2.52114	3.8416e-07	0.174205	2.01538
MSTRG.14759	LOC100570553	aminopeptidase N-like	1190.92	1226.85	1573.99	458.392	266.826	443.637	1.09634e-05	-2.51988	4.36355e-10	0.174357	4.96005
MSTRG.20124	LOC100166804	uncharacterized LOC100166804	243.546	365.885	268.796	82.3057	76.7163	101.11	0.00322181	-2.50118	1.28231e-07	0.176632	2.4919
MSTRG.8533	LOC100161375	calexcitin-2-like	985.985	1111.06	1190.15	311.551	346.343	315.358	5.68e-11	-2.50005	2.2607e-15	0.17677	10.2457
MSTRG.20403	LOC100167826	kelch-like protein 17-like	1128.64	1148.63	911.365	273.435	303.384	370.953	1.08633e-08	-2.49561	4.32371e-13	0.177316	7.96404
MSTRG.4285	NV8	#N/A	1704.51	1931.37	2177.07	530.611	412.817	799.588	8.39785e-06	-2.47544	3.34243e-10	0.179812	5.07583
MSTRG.3228	LOC100169376	uncharacterized LOC100169376	5694.5	7578.53	7869.54	2423.5	1146.47	2776.93	0.00305864	-2.47007	1.21737e-07	0.180483	2.51447
MSTRG.6914	LOC100571147	uncharacterized LOC100571147	518.2	718.301	746.946	160.341	169.303	269.109	0.00103901	-2.46173	4.13535e-08	0.181529	2.98338
MSTRG.22458	LOC100159353	angiotensin-converting enzyme-like	2576.5	2660.78	3647.38	925.92	621.948	1144.64	7.24527e-06	-2.45182	2.88369e-10	0.18278	5.13995
MSTRG.17214	LOC100165001	glucose transporter type 1-like	765.61	1231.07	833.173	265.932	256.086	341.935	4.6836e-05	-2.43949	1.86412e-09	0.184349	4.32942
MSTRG.17959	LOC100573638	aminopeptidase N-like	400.671	665.218	608.804	176.193	128.543	206.87	0.00544291	-2.43929	2.16633e-07	0.184374	2.26417
MSTRG.12471	LOC100571179	lipopolysaccharide-induced tumor necrosis factor-alpha factor homolog	660.871	722.695	779.972	154.683	202.541	306.109	0.000767461	-2.43563	3.05457e-08	0.184843	3.11494
MSTRG.23905	LOC100569104	angiotensin-converting enzyme-like	1350.39	1513.03	1872.61	576.253	335.393	533.693	1.547e-05	-2.43343	6.15723e-10	0.185125	4.81051
MSTRG.13025	LOC100159048	uncharacterized LOC100159048	2660.77	2717	3146.31	1273.23	525.78	803.023	0.00312795	-2.42782	1.24496e-07	0.185846	2.50474
MSTRG.10700	LOC100572539	uncharacterized LOC100572539	2630.39	2360.65	2397.45	537.909	704.643	1037.78	1.32227e-06	-2.41946	5.26276e-11	0.186926	5.87868
MSTRG.21174	LOC100162667	uncharacterized LOC100162667	330.14	458.505	370.336	112.862	98.9852	145.231	0.00137434	-2.4191	5.47e-08	0.186973	2.86191
MSTRG.19408	LOC100575164	angiotensin-converting enzyme-like	4702.54	4385.2	5958.55	1616.26	996.991	2022.19	3.10744e-05	-2.41706	1.23679e-09	0.187238	4.5076
MSTRG.6039	LOC100168122	proton-coupled amino acid transporter 4-like	3277.89	6260.5	3061.75	1284.89	1137.42	1468.74	0.000574082	-2.41446	2.2849e-08	0.187576	3.24103
MSTRG.20962	LOC103308628	#N/A	583.382	800.796	678.395	218.602	174.292	246.178	2.15866e-05	-2.40725	8.59167e-10	0.188515	4.66582
MSTRG.16614	LOC100168111	possible pseudogene or miscRNA, No KEGG entry	406.72	388.41	574.801	166.999	120.696	136.215	0.00164504	-2.40544	6.54742e-08	0.188751	2.78382
MSTRG.8396	LOC100166094	neuroendocrine convertase 1-like	787.866	896.323	1095.41	239.244	241.165	401.454	0.000541794	-2.36253	2.15639e-08	0.194449	3.26617
MSTRG.5229	LOC100160110	uncharacterized LOC100160110	14204.1	10171.7	12231.5	3638.78	3193.97	4769.9	8.54223e-10	-2.35862	3.39989e-14	0.194978	9.06843
MSTRG.10891	LOC100168223	uncharacterized LOC100168223	15282.2	14912.1	15233.7	5080.82	4199.26	5159.33	6.65276e-18	-2.35043	2.64786e-22	0.196087	17.177
MSTRG.11699	LOC100574511	uncharacterized LOC100574511	1513.95	1540.68	2287.65	588.24	363.082	752.197	0.00414277	-2.34566	1.64887e-07	0.196737	2.38271
MSTRG.7345	LOC100160734	voltage-gated potassium channel subunit beta-3-like	1573.93	1929.56	1800.64	626.913	409.885	667.635	1.3748e-06	-2.32822	5.47182e-11	0.199129	5.86176
MSTRG.17085	LOC100571324	uncharacterized LOC100571324	1671.3	2040.1	2496.96	718.178	500.112	795.1	6.8552e-06	-2.30985	2.72844e-10	0.201681	5.16398
MSTRG.8981	LOC100166269	regulator of G-protein signaling 9-like	1567.65	2487.61	1857.83	664.983	657.489	596.559	1.55153e-07	-2.3087	6.17525e-12	0.201842	6.80924
MSTRG.10782	LOC100169243	uncharacterized LOC100169243	84589.8	112724	122728	30519.1	28340.9	45476.2	4.1141e-07	-2.30199	1.63745e-11	0.202783	6.38572
MSTRG.4452	LOC100169117	aminopeptidase N-like	1323.32	1670.88	1692.97	515.867	372.914	645.668	1.98282e-05	-2.29267	7.89182e-10	0.204097	4.70272
MSTRG.20346	LOC100166930	tubulin alpha-1C chain-like	489.303	447.275	492.581	164.901	136.494	169.943	5.75758e-05	-2.27714	2.29157e-09	0.206306	4.23976
MSTRG.1496	LOC100166506	uncharacterized LOC100166506	843.863	1262.59	920.936	246.392	303.737	458.229	0.00634525	-2.25933	2.52547e-07	0.208869	2.19755
MSTRG.17075	LOC100163848	uncharacterized LOC100163848	2983.87	3438.91	4361.55	1395.56	762.43	1430	0.000864763	-2.25426	3.44184e-08	0.209605	3.0631
MSTRG.19234	LOC100161032	follistatin-related protein 5-like	374.932	587.104	497.356	177.89	147.567	164.14	0.00358235	-2.23766	1.42581e-07	0.212029	2.44583
MSTRG.7161	LOC100161432	voltage-dependent calcium channel subunit alpha-2/delta-3-like	1382.23	1871.55	1071.14	555.483	358.994	542.12	0.00320749	-2.23086	1.27661e-07	0.213032	2.49383
MSTRG.20704	LOC100162137	probable maltase-like	632.663	576.063	707.57	270.07	176.006	200.154	0.00085947	-2.22656	3.42078e-08	0.213668	3.06577
MSTRG.18398	LOC100159527	uncharacterized LOC100159527	2177.04	3583.67	3895.22	1019.46	1052.27	1203.69	1.69295e-05	-2.21744	6.73811e-10	0.215023	4.77136
MSTRG.6756	#N/A	#N/A	397.675	530.059	510.356	153.795	168.346	172.054	0.000514096	-2.19307	2.04615e-08	0.218686	3.28896
MSTRG.7232	LOC100169565	5'-nucleotidase	2173.69	3071.59	2763.41	708.611	933.723	1114.38	2.48044e-06	-2.19029	9.87241e-11	0.219108	5.60547
MSTRG.4992	LOC100163900	cytochrome P450 6k1-like	4371.59	4826.95	4689.95	1100.12	1503.51	2192.01	4.30886e-05	-2.18642	1.71497e-09	0.219696	4.36564
MSTRG.16287	LOC100168794	glycoprotein 3-alpha-L-fucosyltransferase A-like	500.275	446.877	446.536	181.871	144.915	152.68	0.000430121	-2.18451	1.71192e-08	0.219986	3.36641
MSTRG.11268	Cox7c	cytochrome c oxidase subunit VIIc (EC:1.9.3.1)	1222.92	1349.56	1305.04	375.398	396.601	572.929	5.37218e-06	-2.17474	2.13818e-10	0.221481	5.26985
MSTRG.12713	LOC100571349	uncharacterized LOC100571349	1496.78	1341.63	1622.59	386.532	544.725	630.843	1.06995e-05	-2.15594	4.25852e-10	0.224387	4.97064
MSTRG.5230	#N/A	#N/A	675.19	453.314	605.8	205.919	179.246	223.49	0.00189939	-2.14704	7.55977e-08	0.225775	2.72139
MSTRG.2889	LOC100167645	uncharacterized LOC100167645	10400	10251.5	15000	4282.85	3720.28	4517.39	2.08585e-08	-2.14247	8.30191e-13	0.226492	7.68072
MSTRG.21441	LOC100168063	histone H2A-like	1586.59	1499.39	1079.66	501.017	507.529	460.553	5.08841e-06	-2.13506	2.02524e-10	0.227659	5.29342
MSTRG.7238	LOC100162698	5'-nucleotidase	1479.77	1925.13	1529.53	515.708	621.627	607.544	8.61074e-08	-2.13196	3.42716e-12	0.228148	7.06496
MSTRG.11470	LOC100160247	uncharacterized LOC100160247	597.385	584.195	681.659	227.235	202.509	229.672	3.56953e-05	-2.13048	1.42071e-09	0.228381	4.44739
MSTRG.15792	LOC100166560	4-coumarate--CoA ligase-like 9-like	2614.98	2704.68	2762.55	930.584	772.186	1159.91	2.38836e-08	-2.12761	9.50591e-13	0.228837	7.6219
MSTRG.13969	ACYPI24700	#N/A	507.85	481.549	493.096	177.066	203.528	143.755	0.00115723	-2.12749	4.6059e-08	0.228855	2.93658
MSTRG.10495	LOC100162164	rhomboid family member 1-like	1185.27	1466.35	1042.01	506.366	488.197	312.439	0.00229752	-2.12431	9.14435e-08	0.229361	2.63874
MSTRG.21872	LOC100160916	histone H2B 1/2-like	8128.74	7780.64	5283.16	2209.02	2272.25	3092.2	6.62846e-06	-2.11119	2.63819e-10	0.231457	5.17859
MSTRG.13855	LOC100164471	uncharacterized LOC100164471	1048.94	1301.75	1358.55	517.47	325.79	482.851	0.000441708	-2.10463	1.75804e-08	0.23251	3.35486
MSTRG.1234	LOC100167380	solute carrier family 23 member 2-like	2158.7	1942.69	2124.58	589.926	892.349	795.587	4.23816e-07	-2.06135	1.68683e-11	0.239592	6.37282
MSTRG.6644	LOC115033708	#N/A	969.304	1160.5	1167.13	352.446	430.131	426.077	2.43457e-06	-2.05823	9.68983e-11	0.24011	5.61358
MSTRG.11078	LOC100167085	mitochondrial sodium/hydrogen exchanger NHA2-like	1511.91	1464.18	1320.7	482.33	440.43	653.327	1.01336e-05	-2.0561	4.03329e-10	0.240465	4.99423
MSTRG.18433	LOC100569064	uncharacterized LOC100569064	1174.46	1167.89	762.679	385.826	314.44	446.493	0.00455918	-2.04273	1.8146e-07	0.242704	2.34111
MSTRG.10714	LOC100144773	membrane alanyl aminopeptidase N	47078	41072.4	40896.7	12425.4	17252.7	18645.3	1.5926e-08	-2.01414	6.33869e-13	0.247562	7.79789
MSTRG.14219	LOC100163145	possible pseudogene or miscRNA, No KEGG entry	2884.05	3603.47	3097.76	978.667	1085.3	1555.82	2.06374e-05	-1.99707	8.21388e-10	0.250509	4.68535
MSTRG.6499	LOC100162791	uncharacterized LOC100162791	5628.96	7559.69	9287.94	3071.26	2127.3	3321.46	0.00110238	-1.98389	4.38758e-08	0.252807	2.95767
MSTRG.23300	LOC100169540	aminopeptidase N-like	33358.5	28729	31221.7	8459.77	11565.6	15500	4.25141e-05	-1.98133	1.6921e-09	0.253256	4.37147
MSTRG.6191	Cp47	cuticular protein 47	6152.81	4476.13	5483.58	1813.72	1565.61	2790.21	0.00126425	-1.96727	5.03185e-08	0.255736	2.89817
MSTRG.16915	LOC100160121	uncharacterized LOC100160121	12936.5	11058.4	16193.1	5321.17	3836.52	6230.84	0.000157566	-1.96314	6.27128e-09	0.25647	3.80254
MSTRG.15994	LOC100167996	muscle M-line assembly protein unc-89-like	3469.77	3342.95	3391.84	1098.23	1254.89	1566.46	2.94115e-08	-1.96087	1.17061e-12	0.256874	7.53148
MSTRG.13296	LOC100165011	ring canal kelch homolog	1301.7	1584	1293.39	428.443	579.604	616.872	0.000104506	-1.93699	4.15945e-09	0.26116	3.98086
MSTRG.2417	LOC100163220	proton-coupled amino acid transporter 4-like	3986.18	4325.89	4620.87	1295.97	1577.51	2169.35	2.51587e-05	-1.9308	1.00134e-09	0.262285	4.59931
MSTRG.16235	LOC100165074	myosin light chain-like	63548.1	53875.6	83773.7	29131.1	20230.1	29013.1	0.000201164	-1.92536	8.00652e-09	0.263275	3.69645
MSTRG.21111	#N/A	#N/A	1440.67	2072.2	1335.23	582.341	555.873	788.441	0.00772048	-1.89172	3.07283e-07	0.269485	2.11236
MSTRG.25506	LOC103311602	#N/A	1334.66	1075.17	1087.44	370.984	460.027	559.466	0.00101923	-1.8901	4.05666e-08	0.269789	2.99173
MSTRG.5440	LOC100165963	ZM-domain protein	4080.95	3742.55	4977.57	1590.2	1411.69	2085.36	2.08712e-05	-1.88744	8.30693e-10	0.270286	4.68045
MSTRG.19843	LOC100166650	troponin C-like	18793.2	15953.7	24296.7	8688.29	6328.88	8525.84	9.32791e-05	-1.87691	3.7126e-09	0.272267	4.03022
MSTRG.20713	LOC100160111	probable maltase L-like	43862.4	43000.6	52718.8	16204.5	17541.5	22112.3	4.42491e-08	-1.87417	1.76116e-12	0.272783	7.3541
MSTRG.20700	#N/A	#N/A	8863.42	8774.81	10865.5	3117.4	3250.08	5076.81	0.000277221	-1.86919	1.10337e-08	0.273728	3.55717
MSTRG.3129	LOC100166119	twitchin-like	10494.8	8479.12	9439.88	3502.43	3574.32	4371.83	7.07782e-09	-1.85906	2.81704e-13	0.275656	8.1501
MSTRG.8490	LOC100163274	troponin T-like	72158.9	60892.8	91746.7	34556.3	22316.4	33928.6	0.00164369	-1.84964	6.54206e-08	0.277461	2.78418
MSTRG.4367	LOC100570813	uncharacterized LOC100570813	1626.65	1677.16	1999.46	598.313	609.572	953.696	0.00359493	-1.83777	1.43082e-07	0.279754	2.44431
MSTRG.20731	LOC100165632	regulating synaptic membrane exocytosis protein 2-like	1455.18	2022.01	1822.24	749.468	660.798	746.773	3.88867e-05	-1.83596	1.54773e-09	0.280105	4.4102
MSTRG.8597	LOC100165751	muscle LIM protein Mlp84B-like	26752	26139.1	38541.6	13631.8	10338.9	13216.5	0.000107217	-1.8357	4.26735e-09	0.280156	3.96974
MSTRG.20470	LOC100160479	uncharacterized LOC100160479	3876.12	4337.47	4699.26	2138.49	1357.83	1804.64	0.000200015	-1.81526	7.9608e-09	0.284153	3.69894
MSTRG.3515	LOC100164905	uncharacterized LOC100164905	25164.5	22327.8	33442.8	12284.5	8128.9	12920.6	0.00443059	-1.81001	1.76342e-07	0.285189	2.35354
MSTRG.21450	LOC100162777	alpha-crystallin B chain-like	6564.82	6609.75	9385.22	3437.43	2685.26	3358.66	0.000179084	-1.76784	7.12771e-09	0.293649	3.74694
MSTRG.24586	LOC100167750	muscular protein 20-like	4723.59	4274.04	5765.79	2348.48	1562.07	2349.25	0.0019599	-1.74897	7.80061e-08	0.297515	2.70777
MSTRG.17583	LOC100164217	putative inorganic phosphate cotransporter-like	5079.88	4858.9	5388.86	1534.44	2393.55	2626.4	0.00129358	-1.73911	5.14859e-08	0.299555	2.88821
MSTRG.5661	LOC100161259	acetyl-CoA acetyltransferase, cytosolic-like	44458.1	36520.9	35128.3	13423.7	16425.3	19855.8	2.40307e-05	-1.73528	9.56447e-10	0.30035	4.61923
MSTRG.15987	LOC100169331	protein lethal(2)essential for life-like	5851.83	5615.91	8794.54	3053.64	2416.97	3186.53	0.00397176	-1.73409	1.5808e-07	0.300599	2.40102
MSTRG.8893	LOC100160326	uncharacterized protein LOC100160326	3494.17	2857.25	2950.65	1414.09	1130.5	1452.67	2.11599e-05	-1.72332	8.42186e-10	0.30285	4.67449
MSTRG.16363	LOC100161052	uncharacterized LOC100161052	3535.08	3138.4	3974.48	1599.58	1335.26	1648.47	6.18534e-06	-1.71941	2.46183e-10	0.303673	5.20864
MSTRG.11428	LOC100161916	poly(A) RNA polymerase gld-2 homolog A-like	5085.88	4450	3409.47	1999.56	1542.07	2037.85	0.00123369	-1.71717	4.91021e-08	0.304145	2.90879
MSTRG.19276	LOC100162378	solute carrier family 15 member 1-like	1202.64	1394.81	1172.56	480.543	621.288	530.3	0.00086375	-1.70986	3.43781e-08	0.305689	3.06361
MSTRG.8189	LOC100161387	acyl-protein thioesterase 1,2-like	1942.26	1778.19	2136.46	881.445	696.989	956.507	0.00019986	-1.7087	7.95461e-09	0.305936	3.69927
MSTRG.10691	LOC100163851	glutamyl aminopeptidase-like	3481.79	3358.2	3125.26	1164.32	1474.31	1716.58	6.00766e-05	-1.69265	2.39111e-09	0.309358	4.22129
MSTRG.10935	LOC100160733	3-alpha-(or 20-beta)-hydroxysteroid dehydrogenase-like	979.671	907.929	781.657	357.112	378.281	431.954	0.00563735	-1.68954	2.24372e-07	0.310026	2.24892
MSTRG.17670	LOC100570856	glutathione S-transferase-like	11834.7	14632.9	13666.1	4543.39	5409.57	7726.06	0.00425974	-1.67751	1.69542e-07	0.312621	2.37062
MSTRG.3311	LOC100167965	ryanodine receptor 44F-like	2289.3	1872.9	2292.39	965.746	795.639	1079.07	0.000349347	-1.6741	1.39044e-08	0.313362	3.45674
MSTRG.15308	LOC100164690	neuronal calcium sensor 2-like	1797.92	1985.27	2292.96	990.727	851.076	838.132	0.000149354	-1.66698	5.94444e-09	0.314912	3.82578
MSTRG.21455	LOC103311944	#N/A	3137.95	2635.5	3013.37	1317.6	1180.13	1426.43	9.57036e-06	-1.64357	3.8091e-10	0.320064	5.01907
MSTRG.9876	LOC100168802	thrombospondin-3-like	2167.61	2173.98	2530.29	1104.9	936.165	1032.1	2.90827e-05	-1.63898	1.15752e-09	0.321084	4.53637
MSTRG.7353	LOC100160265	Asparagine synthase	4509.63	4392.57	5589.64	2390.74	2182.02	1914	6.36884e-05	-1.63555	2.53486e-09	0.321847	4.19594
MSTRG.18020	LOC100159244	slit homolog 3 protein-like	2008.2	3023.44	2198.56	1148.59	1109.56	988.085	0.00758025	-1.63166	3.01701e-07	0.322716	2.12032
MSTRG.7978	LOC100168150	multidrug resistance protein 3-like	3541.07	2660.76	2470.38	1218.19	1297.43	1416.14	0.00109089	-1.61342	4.34183e-08	0.326823	2.96222
MSTRG.24851	LOC100162688	UDP-glucuronosyltransferase 2B17-like	2555.96	2540.93	3269.45	1104.02	1355.99	1462.23	0.00243581	-1.54503	9.69476e-08	0.342688	2.61336
MSTRG.10702	LOC100161622	endoplasmic reticulum aminopeptidase 2-like	4147.73	4588.62	4428.63	1672.74	1983.39	2528.19	0.0013108	-1.54277	5.2171e-08	0.343227	2.88246
MSTRG.24548	LOC100168987	UDP-glucuronosyltransferase 2B13-like	3111.2	3495.47	4155.54	1852.08	1816.02	1448.48	0.00505835	-1.51036	2.01327e-07	0.351023	2.29599
MSTRG.21549	LOC100167523	uncharacterized LOC100167523	1520.69	1871.28	1871.12	901.792	743.555	869.459	0.0054824	-1.50252	2.18205e-07	0.352936	2.26103
MSTRG.23503	LOC100159741	NADPH--cytochrome P450 reductase-like	5411.39	5282.82	6714.07	2888.34	2862.8	2611.82	0.000153227	-1.48984	6.0986e-09	0.356053	3.81466
MSTRG.7183	LOC100163895	UDP-glucose 4-epimerase-like	1856.14	1682.04	2143.48	1007.5	895.176	848.579	0.00583123	-1.47269	2.32089e-07	0.360311	2.23424
MSTRG.8310	LOC100161480	cytochrome P450 6a2-like	2660.02	2342.97	2667.29	1419.71	1080.74	1213.78	0.00341104	-1.47216	1.35763e-07	0.360443	2.46711
MSTRG.5752	ACYPI50196	#N/A	32842.6	22681.5	26265.6	13190.2	13189.2	13366.6	0.000816263	-1.46678	3.24881e-08	0.36179	3.08817
MSTRG.19657	#N/A	#N/A	7320.49	6120.57	6205.59	3709.72	2581.84	3294.53	0.00975987	-1.45652	3.88453e-07	0.36437	2.01056
MSTRG.10410	LOC100164852	gamma-glutamyltranspeptidase 1-like	4016.26	3951.26	3269.34	1924.43	1611.64	2049.52	0.0039167	-1.42061	1.55889e-07	0.373553	2.40708
MSTRG.9740	LOC100161467	synaptic vesicle glycoprotein 2B-like	5441.66	6225.14	5319.11	2385.29	2728.01	3384.99	0.0056444	-1.41099	2.24653e-07	0.376054	2.24838
MSTRG.12175	Accoas	acetyl coenzyme A synthase	8297.75	7039.66	6311.93	3214.89	3808.46	3898.85	0.00221879	-1.39184	8.831e-08	0.381077	2.65388
MSTRG.5238	LOC100159953	uncharacterized LOC100159953	20202.1	18195.6	20482.5	9431.17	9103.69	11406.5	0.000288453	-1.37425	1.14807e-08	0.385753	3.53993
MSTRG.20115	LOC100144890	macrophage migration inhibitory factor-like protein	5824.03	5107.01	5319.47	2802.84	2633.08	2865.67	0.000152785	-1.36329	6.08101e-09	0.388694	3.81592
MSTRG.20003	LOC100161178	L-threonine aldolase 2	4907.27	5212.7	5658.46	2660.97	2667.08	3088.83	0.00283264	-1.27447	1.12742e-07	0.413378	2.54781
MSTRG.4579	LOC100160153	glycerol-3-phosphate dehydrogenase, mitochondrial-like	20292.5	19290	20618.2	11507	10606.6	11929.2	0.00569465	-1.15165	2.26653e-07	0.450109	2.24453
MSTRG.12803	#N/A	#N/A	2919.09	2971.87	2803.09	5104.04	5097.69	5367.32	0.000950542	1.24706	3.78325e-08	2.37358	3.02203
MSTRG.12802	#N/A	#N/A	2919.09	2971.87	2796.2	5100.33	5097.69	5372.06	0.000930844	1.2489	3.70485e-08	2.3766	3.03112
MSTRG.10607	LOC100162068	serine/threonine-protein kinase MRCK alpha-like	3560.81	3533.19	3854.74	5938.97	7011.57	7333.85	0.000791396	1.31597	3.14983e-08	2.48969	3.10161
MSTRG.7435	LOC100167074	DNA topoisomerase 2-like	12596.7	11675.5	13551.3	22142.8	24115	24034.5	9.82819e-05	1.32409	3.91172e-09	2.50374	4.00753
MSTRG.6536	LOC100161333	protein RCC2 homolog	9616.36	8967.75	10198.9	16367.9	20665.5	17709	0.000304518	1.37191	1.21201e-08	2.58812	3.51639
MSTRG.9829	LOC100160898	uncharacterized LOC100160898	2557.66	2931.27	3373.71	5071.42	5611.21	6239.52	0.00352412	1.37919	1.40264e-07	2.60123	2.45295
MSTRG.18060	LOC100169187	uncharacterized LOC100169187	28205	26398.7	34508.4	51995.8	56539.1	61800.6	0.000764259	1.38206	3.04183e-08	2.60641	3.11676
MSTRG.9999	LOC100161010	bipolar kinesin KRP-130-like	3212.88	3212.99	3447.2	5614.23	6756.01	6623.18	8.61979e-05	1.39496	3.43076e-09	2.62981	4.0645
MSTRG.20382	LOC100164325	cyclin-dependent kinase 6-like	1194.02	1331.27	1308.34	2519.99	3128.47	2291.41	0.00102652	1.55065	4.08566e-08	2.92948	2.98863
MSTRG.5100	LOC100168992	prolow-density lipoprotein receptor-related protein 1-like	851.258	918.13	1219.56	1878.13	2152.24	2164.43	0.00596546	1.55102	2.37431e-07	2.93023	2.22436
MSTRG.5447	LOC100164379	uncharacterized LOC100164379	1340.88	1421.72	1849.97	3378.5	3448.93	2719.66	0.00635138	1.55176	2.52791e-07	2.93174	2.19713
MSTRG.9649	LOC100571126	uncharacterized LOC100571126	1659.56	1481.48	1843.99	3308.19	3404.06	3981.24	1.12752e-05	1.62243	4.48762e-10	3.07893	4.94788
MSTRG.16398	LOC100168792	MOXD1 homolog 1-like	658.604	835.782	797.563	1433.3	1941.97	1593.05	0.00232856	1.6445	9.26792e-08	3.1264	2.63291
MSTRG.19729	LOC100167244	semaphorin-2A-like	825.249	963.492	1166.97	2200.06	2339.51	1960.43	0.000521118	1.67661	2.0741e-08	3.19676	3.28306
MSTRG.19516	LOC100159804	uncharacterized LOC100159804	326.271	315.267	354.345	683.721	792.391	731.511	0.00425566	1.69337	1.6938e-07	3.23411	2.37103
MSTRG.14003	LOC100161538	slit homolog 3 protein-like	676.283	808.472	946.561	1883.7	2006.49	1524.65	0.00212944	1.70399	8.47536e-08	3.258	2.67174
MSTRG.16476	LOC100164109	neurogenic locus Notch protein-like	1679.47	1628.89	2286.37	4403.67	4894.9	3346.67	0.00253631	1.73558	1.00948e-07	3.33013	2.5958
MSTRG.1232	#N/A	#N/A	1464.89	1566.71	1885.85	3718.75	4238.18	3683.24	1.32773e-07	1.82848	5.2845e-12	3.55164	6.87689
MSTRG.11119	LOC100574872	uncharacterized LOC100574872	599.197	689.693	691.813	1489.25	1765.41	1440.53	7.82154e-06	1.83185	3.11305e-10	3.55993	5.10671
MSTRG.3303	LOC100164548	uncharacterized LOC100164548	1423.17	1695.38	2196.48	4541.46	4860.62	3486.27	0.000344391	1.88129	1.37071e-08	3.68404	3.46295
MSTRG.11398	#N/A	#N/A	348.167	481.568	426.714	915.675	1146.32	1079.65	0.000213631	1.93973	8.50272e-09	3.83635	3.67034
MSTRG.21987	LOC100164670	zinc finger SWIM domain-containing protein 6-like	1798.2	1935.4	1602.26	4413.96	4809.49	4175.1	3.06411e-10	1.95139	1.21955e-14	3.86747	9.5137
MSTRG.5438	#N/A	#N/A	955.493	862.969	1306.09	3133.4	2663.08	2180.36	0.000233474	1.99053	9.29248e-09	3.97384	3.63176
MSTRG.18338	LOC100163007	serpin B8-like	312.753	318.719	478.351	972.299	924.21	965.074	0.000917876	2.00927	3.65324e-08	4.02579	3.03722
MSTRG.8557	LOC100569483	chromobox protein homolog 3-like	369.969	237.174	254.472	720.124	764.319	746.136	0.00314415	2.01611	1.2514e-07	4.04492	2.5025
MSTRG.15387	LOC100161662	uncharacterized LOC100161662	347.08	332.141	388.655	996.826	1051.56	716.673	0.000611088	2.01749	2.43219e-08	4.04879	3.2139
MSTRG.10933	LOC100572661	uncharacterized LOC100572661	1041.96	1108.5	1466.86	2788.02	3397.63	3299.64	1.30016e-07	2.04087	5.17477e-12	4.11494	6.886
MSTRG.6552	LOC100165518	cadherin-related tumor suppressor-like	1038.81	1077.84	1563.06	3617.08	3943.12	2390.51	0.000782151	2.11049	3.11304e-08	4.31837	3.10671
MSTRG.6554	LOC100573752	cadherin-related tumor suppressor-like	373.136	340.116	458.69	879.647	1402.04	923.836	0.00127833	2.12988	5.08786e-08	4.3768	2.89336
MSTRG.464	LOC100162936	laminin subunit alpha-1-like	992.991	999.843	1260.17	3042.47	3661.57	2362.51	1.01587e-06	2.1714	4.04327e-11	4.50461	5.99316
MSTRG.8501	#N/A	#N/A	159.607	164.787	202.799	393.289	492.512	605.412	0.00299923	2.19962	1.19372e-07	4.59359	2.52299
MSTRG.11909	LOC100163406	zinc finger protein 271-like	2332.65	2629.13	4157.62	8080.81	8905.75	9020.4	2.96778e-06	2.2161	1.18121e-10	4.64636	5.52757
MSTRG.5952	LOC100169209	RNA-binding protein lin-28-like	3880.66	3877.25	6284	13246.9	15102	13117.3	1.19436e-07	2.28967	4.75367e-12	4.88943	6.92286
MSTRG.13880	LOC103309678	#N/A	214.811	191.953	201.708	551.116	708.083	540.673	1.84381e-05	2.29308	7.33857e-10	4.901	4.73428
MSTRG.16568	#N/A	#N/A	149.166	178.203	207.204	609.21	475.287	575.572	4.01436e-05	2.40167	1.59775e-09	5.28413	4.39638
MSTRG.10977	LOC100159694	uncharacterized LOC100159694	1082.59	1187.7	1387.67	3955.44	5095.32	2368.77	0.000211252	2.40843	8.40804e-09	5.30898	3.6752
MSTRG.716	LOC100161671	uncharacterized LOC100161671	142.933	117.278	178.659	460.325	458.049	459.705	9.0104e-05	2.41866	3.58623e-09	5.34673	4.04526
MSTRG.11040	LOC103309851	#N/A	167.947	180.642	177.615	606.89	551.204	519.414	4.73344e-07	2.4522	1.88396e-11	5.47251	6.32482
MSTRG.419	LOC100164320	uncharacterized LOC100164320	486.704	420.514	776.655	1606.28	1914.41	1909.79	3.84198e-06	2.47247	1.52915e-10	5.54995	5.41544
MSTRG.242	#N/A	#N/A	84.6043	98.0092	117.831	273.685	295.549	409.616	0.00190492	2.49423	7.58177e-08	5.63427	2.72012
MSTRG.12278	LOC100161337	uncharacterized LOC100161337	665.915	1394.67	1848.99	4429.8	4653.54	3748.88	0.00894187	2.51135	3.55895e-07	5.70153	2.04857
MSTRG.17577	LOC100163030	bone morphogenetic protein 7-like	270.014	314.016	404.649	1081.43	1174.94	1009.19	1.92083e-08	2.52379	7.64511e-13	5.7509	7.71651
MSTRG.2141	#N/A	#N/A	101.271	142.068	163.674	456.785	523.833	370.653	0.000594342	2.54069	2.36554e-08	5.81865	3.22596
MSTRG.241	LOC100571724	uncharacterized LOC100571724	616.938	600.453	965.086	1830.56	2576.33	3023.57	1.51104e-06	2.58128	6.0141e-11	5.98472	5.82072
MSTRG.3302	#N/A	#N/A	151.252	119.505	194.634	476.212	560.316	573.451	1.04168e-05	2.62419	4.14597e-10	6.16538	4.98227
MSTRG.2641	LOC100162071	protein Wnt-1-like	127.308	174.839	187.77	571.962	607.714	547.489	5.7478e-07	2.66154	2.28768e-11	6.3271	6.2405
MSTRG.8493	LOC100159190	uncharacterized LOC100159190	367.951	374.101	377.355	1251.83	1789.23	992.854	1.04129e-07	2.70361	4.14446e-12	6.51431	6.98243
MSTRG.13872	LOC100163852	protein gooseberry-like	182.531	217.932	341.551	846.522	1016.94	835.485	6.80214e-06	2.72595	2.70732e-10	6.61595	5.16735
MSTRG.490	LOC100169486	#N/A	131.454	112.693	84.622	444.769	531.468	288.074	0.000838958	2.85017	3.33914e-08	7.21083	3.07626
MSTRG.9257	LOC100160750	paired box protein Pax-6-like	76.2811	99.171	104.127	345.189	503.235	248.307	0.00138597	2.89277	5.51628e-08	7.42694	2.85825
MSTRG.13893	LOC100161882	uncharacterized LOC100161882	413.796	378.669	578.197	1761.34	2170.86	1484.04	1.54531e-10	2.89829	6.15049e-15	7.45545	9.81098
MSTRG.4793	LOC100570746	noggin-like	187.732	172.705	258.993	719.324	863.36	870.698	1.10192e-09	2.89964	4.38574e-14	7.46242	8.95785
MSTRG.7002	LOC100168810	protein Wnt-2-like	85.6615	100.335	135.135	309.722	547.8	433.001	0.000114225	2.9327	4.54626e-09	7.63536	3.94224
MSTRG.19574	LOC100159477	protein scabrous-like	234.635	267.813	401.48	1178.4	1558.68	950.661	4.92973e-07	2.96528	1.96208e-11	7.80979	6.30718
MSTRG.11825	LOC100158899	uncharacterized LOC100158899	574.242	822.225	1306.06	3204.89	4886.64	3138.94	7.39864e-06	3.00048	2.94473e-10	8.00267	5.13085
MSTRG.20834	LOC100164522	uncharacterized LOC100164522	118.98	128.541	226.697	611.925	809.414	553.283	3.11642e-05	3.01392	1.24037e-09	8.07757	4.50634
MSTRG.9450	LOC100165630	protein notum homolog	375.265	439.777	542.689	1913.42	2322.7	1626.46	2.5452e-14	3.08147	1.01301e-18	8.46479	13.5943
MSTRG.13616	LOC100575169	uncharacterized LOC100575169	41.8914	77.5241	63.8606	260.154	337.575	188.242	0.00210348	3.08175	8.37204e-08	8.46641	2.67706
MSTRG.25392	LOC107885704	#N/A	22.0949	33.4997	30.613	154.185	108.782	120.205	0.001233	3.18625	4.90747e-08	9.10239	2.90904
MSTRG.24203	LOC100569296	possible pseudogene or miscRNA, No KEGG entry	35.6548	81.0948	85.7897	355.362	321.359	292.411	0.000251035	3.30262	9.99143e-09	9.86709	3.60027
MSTRG.15180	LOC100159487	homeobox protein SIX6-like	62.7437	68.6456	149.956	473.482	526.182	435.666	5.48012e-05	3.43416	2.18114e-09	10.809	4.26121
MSTRG.21816	LOC100160123	twist-like	124.196	99.1961	155.765	619.187	651.15	670.79	5.88167e-13	3.44109	2.34096e-17	10.861	12.2305
MSTRG.12732	LOC100158950	homeobox protein Nkx-6.2-like	45.0353	119.509	102.988	423.257	572.615	374.47	0.00028745	3.44594	1.14408e-08	10.8976	3.54144
MSTRG.3132	LOC100569010	uncharacterized LOC100569010	145.04	144.453	326.651	1267.4	1349.08	674.799	0.000219754	3.53329	8.74644e-09	11.5778	3.65806
MSTRG.1779	LOC100573535	homeobox protein MSX-1-like	14.8011	32.3475	30.5935	93.6108	157.018	160.934	0.0043991	3.54057	1.75089e-07	11.6364	2.35664
MSTRG.20833	#N/A	#N/A	10.6292	28.934	32.8482	122.607	166.635	134.784	0.00237275	3.75224	9.44378e-08	13.4752	2.62475
MSTRG.19583	LOC103308875	#N/A	10.5949	11.8825	6.37723	51.0714	65.2259	53.4907	0.00949225	3.77722	3.77801e-07	13.7106	2.02263
MSTRG.713	LOC100167040	possible pseudogene or miscRNA, No KEGG entry	50.2414	50.544	61.6908	305.253	466.826	282.572	3.92787e-10	3.95095	1.56333e-14	15.4652	9.40584
MSTRG.20456	LOC100168935	protein decapentaplegic-like	24.189	53.8534	53.5707	234.977	394.738	253.923	4.62232e-06	4.03492	1.83973e-10	16.392	5.33514
MSTRG.14681	LOC100575765	leucine-rich repeat-containing protein 52-like	60.6582	49.4007	82.3612	693.355	362.417	271.278	1.1679e-05	4.09056	4.64835e-10	17.0366	4.9326
MSTRG.2421	#N/A	#N/A	24.1858	42.6001	16.8633	176.125	269.553	136.288	0.000188674	4.11624	7.50942e-09	17.3425	3.72429
MSTRG.5593	LOC100167763	transcription factor Sp9-like	100.25	242.934	364.801	1644.27	1977.93	1410.08	1.32875e-06	4.12188	5.28856e-11	17.4105	5.87656
MSTRG.13889	LOC100168481	uncharacterized LOC100168481	439.863	495.267	838.952	4504.13	5198.7	3053.91	9.36654e-15	4.14608	3.72798e-19	17.7049	14.0284
MSTRG.17381	LOC100568616	zinc finger protein 224-like	57.5318	56.1879	110.952	480.167	630.256	568.91	1.67346e-11	4.23466	6.66052e-16	18.8261	10.7764
MSTRG.15449	LOC100570649	peroxidasin homolog	70.0392	160.322	103.053	951.199	970.429	645.23	4.97451e-11	4.29591	1.97991e-15	19.6426	10.3032
MSTRG.13715	LOC100169393	neurogenic protein big brain-like	241.933	294.987	464.69	2371.79	3218.49	2472.9	5.31014e-21	4.37894	2.11349e-25	20.8061	20.2749
MSTRG.13299	LOC100570535	uncharacterized LOC100570535	8.548	33.4875	27.1791	218.522	257.989	139.761	0.000112472	4.62741	4.4765e-09	24.7166	3.94895
MSTRG.13297	LOC100159630	uncharacterized LOC100159630	10.6316	18.8096	6.48136	139.195	105.773	79.3774	5.0389e-05	4.66822	2.00553e-09	25.4259	4.29766
MSTRG.9148	LOC100572631	uncharacterized LOC100572631	12.7194	19.9417	20.3071	151.046	193.255	199.202	1.59471e-12	4.93831	6.34711e-17	30.6604	11.7973
MSTRG.14661	LOC100158695	peroxidasin homolog	30.4439	25.6199	57.1039	585.764	376.699	247.512	4.4521e-08	4.98178	1.77198e-12	31.5984	7.35144
MSTRG.3314	LOC100574507	leucine-rich repeats and immunoglobulin-like domains protein 1-like	33.5672	24.4778	20.3166	542.97	330.366	276.061	2.12572e-14	5.64795	8.46058e-19	50.142	13.6725
MSTRG.7651	LOC100161332	uncharacterized LOC100161332	42.9383	62.9602	245.425	1516.9	2675.08	2139.92	1.92716e-06	6.05998	7.67027e-11	66.7169	5.71508
MSTRG.20444	LOC100568869	uncharacterized LOC100568869	11.678	5.17875	8.79583	185.796	172.696	169.632	2.21685e-18	6.39397	8.82327e-23	84.0962	17.6543
MSTRG.9690	LOC100576069	uncharacterized LOC100576069	16.8965	8.60709	21.4862	332.255	540.666	270.685	4.30683e-17	6.75528	1.71416e-21	108.029	16.3658
MSTRG.21515	LOC100569970	group 3 secretory phospholipase A2-like	0.156775	0.49383	7.55981	56.5783	148.257	71.0094	0.0042394	7.50829	1.68733e-07	182.063	2.3727
MSTRG.22833	#N/A	#N/A	0.15186	0.495175	4.07524	27.6452	63.2982	48.0315	0.000294133	7.69768	1.17068e-08	207.603	3.53146
MSTRG.8964	#N/A	#N/A	0.150168	5.09636	0.53258	37.9257	91.3861	88.1691	9.49003e-06	8.10144	3.77712e-10	274.647	5.02273
MSTRG.13998	LOC100159745	uncharacterized LOC100159745	64.805	191.936	279.805	5785.78	13035.3	7598.79	2.94866e-18	8.14717	1.1736e-22	283.492	17.5304
MSTRG.12089	#N/A	#N/A	0.144189	0.467607	2.8882	53.0392	28.0662	50.1052	1.80603e-05	8.34232	7.18818e-10	324.554	4.74327
MSTRG.15835	LOC100163119	uncharacterized LOC100163119	96.0585	100.259	90.3247	5736.57	13042.1	8641.34	8.68487e-70	9.53727	3.45667e-74	743.025	69.0612
MSTRG.22004	LOC100166012	uncharacterized LOC100166012	4.37662	0.618475	0.692658	212.425	322.261	218.867	5.92622e-27	10.7119	2.35869e-31	1677.22	26.2272
MSTRG.6949	LOC107884433	#N/A	0.0963739	0.298039	0.337011	41.3716	22.0146	29.0416	6.95497e-05	11.4662	2.76815e-09	2829.2	4.1577
MSTRG.497	#N/A	#N/A	0.115555	0.362154	0.406922	27.8939	48.1768	43.1793	3.12015e-07	11.9714	1.24185e-11	4015.63	6.50582
MSTRG.13878	LOC100575170	protein gooseberry-neuro-like	0.177239	0.562706	0.630849	114.171	185.578	136.327	4.32781e-24	14.7	1.72251e-28	26616.7	23.3637

## Sheet: DEGs_2vs3_sequential
gene_ID	LOC#	gene name	F1_2	F2_2	F3_2	F1_3	F2_3	F3_3	padj	log2FoldChange	pvalue	foldChange	log10padj
MSTRG.2096	LOC100570826	uncharacterized LOC100570826	53.7524	34.1309	101.098	0.466794	0.335062	0.589832	1.91796e-08	-12.9753	7.63366e-13	0.000124175	7.71716
MSTRG.14192	LOC100570692	glucose dehydrogenase [acceptor]-like	16.9122	48.672	48.0103	0.335072	0.261993	0.367224	5.2781e-05	-11.9039	2.10074e-09	0.00026095	4.27752
MSTRG.7178	LOC100306981	#N/A	23.4198	26.2491	57.3988	0.424757	0.265418	0.589918	8.08785e-05	-11.7882	3.21905e-09	0.000282754	4.09217
MSTRG.18495	LOC100169358	probable cationic amino acid transporter-like	16.7884	30.6401	56.1447	0.414019	0.260417	0.570155	0.00049963	-11.6892	1.98858e-08	0.00030283	3.30135
MSTRG.18551	LOC100572028	uncharacterized LOC100572028	24.5655	20.3243	51.4176	0.32818	0.242463	0.380778	0.000417013	-11.5682	1.65975e-08	0.000329319	3.37985
MSTRG.5047	LOC100166593	alpha-(1,6)-fucosyltransferase-like	31.1637	17.174	41.0082	0.362137	0.23777	0.473784	0.000481182	-11.4205	1.91515e-08	0.000364825	3.31769
MSTRG.16084	#N/A	#N/A	24.4215	19.492	43.6662	0.391413	0.238888	0.546922	0.000772935	-11.3478	3.07636e-08	0.000383688	3.11186
gene-LOC100569327	LOC100569327	uncharacterized LOC100569327	23.574	22.5921	37.4467	0.33928	0.227723	0.432247	0.000481729	-11.2538	1.91733e-08	0.000409501	3.3172
MSTRG.9665	LOC100161503	sodium- and chloride-dependent transporter XTRP3B-like	32.833	29.7758	19.2641	0.464264	0.239139	0.738103	0.000513841	-11.1915	2.04514e-08	0.000427581	3.28917
MSTRG.19567	LOC100574424	peptide transporter family 1-like	30.3529	31.1619	18.3601	0.308495	0.218761	0.369683	0.000733283	-11.1659	2.91854e-08	0.000435249	3.13473
MSTRG.5719	LOC100569278	uncharacterized LOC100569278	17.7725	31.6276	30.1649	0.382784	0.227079	0.54423	0.00134866	-11.1292	5.36779e-08	0.000446469	2.8701
MSTRG.4114	#N/A	#N/A	23.6708	21.3038	30.398	0.295934	0.211267	0.350607	0.00133873	-11.0223	5.32829e-08	0.0004808	2.87331
MSTRG.4325	LOC100302487	uncharacterized LOC100302487	82.1701	65.3713	74.3182	5.09355	0.35706	0.617076	2.58363e-09	-8.17744	1.02831e-13	0.00345418	8.58777
MSTRG.1273	#N/A	#N/A	38.9066	53.052	56.5788	0.348685	0.296531	2.77875	3.94692e-06	-7.87951	1.57091e-10	0.0042465	5.40374
MSTRG.19454	#N/A	#N/A	51.9864	43.874	93.2969	0.432175	5.95113	4.11206	0.000528439	-6.27053	2.10324e-08	0.0129533	3.27701
MSTRG.13271	LOC100573594	follistatin-like	119.466	157.664	160.487	18.6083	12.7078	0.489992	0.00345701	-5.69869	1.37592e-07	0.0192541	2.4613
MSTRG.21713	LOC100166712	uncharacterized LOC100166712	1414.72	614.711	1695.18	110.33	44.9516	111.051	2.41684e-09	-5.53027	9.61926e-14	0.0216383	8.61675
MSTRG.21419	LOC100570184	nose resistant to fluoxetine protein 6-like	219.367	55.6509	62.188	6.27586	13.7886	6.60372	0.00540829	-5.48566	2.15255e-07	0.0223178	2.26694
MSTRG.14580	#N/A	#N/A	55.7082	49.561	92.6594	8.45555	9.27959	2.97217	0.00154977	-4.84838	6.16822e-08	0.0347129	2.80973
MSTRG.21399	#N/A	#N/A	139.082	120.972	129.986	14.1768	16.0208	11.1838	2.11632e-10	-4.78235	8.42318e-15	0.0363386	9.67442
MSTRG.6825	LOC100572479	uncharacterized LOC100572479	1777.3	588.858	1722.17	96.7747	160.22	173.636	3.65622e-08	-4.75098	1.45521e-12	0.0371374	7.43697
MSTRG.12839	#N/A	#N/A	105.606	59.0306	58.2247	5.01923	11.4987	8.63257	0.000926339	-4.70195	3.68692e-08	0.0384214	3.03323
MSTRG.3228	LOC100169376	uncharacterized LOC100169376	2464.84	1166.01	2667.14	197.306	146.935	335.917	6.41456e-09	-4.65994	2.55306e-13	0.0395566	8.19283
MSTRG.24581	#N/A	#N/A	716.244	368.392	1174.42	87.7317	99.2483	68.1577	2.33478e-08	-4.64436	9.29264e-13	0.0399861	7.63175
MSTRG.4285	NV8	#N/A	539.781	419.872	768.675	58.357	92.5723	47.2829	1.40742e-12	-4.62927	5.60169e-17	0.0404063	11.8516
MSTRG.455	LOC100570038	uncharacterized LOC100570038	83.8272	88.0998	210.367	19.8603	10.4899	13.6054	0.00108567	-4.59737	4.32109e-08	0.0413099	2.9643
MSTRG.20032	LOC100159024	uncharacterized LOC100159024	6929.3	3027.76	6664.98	547.455	470.545	843.506	4.46349e-12	-4.59582	1.77651e-16	0.0413542	11.3503
MSTRG.4118	LOC100302370	uncharacterized LOC100302370	216.288	170.924	347.461	34.5678	28.2746	22.8701	2.37557e-08	-4.57485	9.455e-13	0.0419598	7.62423
MSTRG.19439	#N/A	#N/A	67.8983	70.977	93.4485	13.0188	9.31384	5.39389	5.3702e-05	-4.53335	2.13739e-09	0.0431843	4.27001
MSTRG.10292	LOC100159332	bifunctional enzyme CarRP-like	667.166	397.604	351.347	91.0967	51.588	28.6939	1.10747e-06	-4.49261	4.40786e-11	0.0444211	5.95567
MSTRG.24010	LOC100571631	uncharacterized LOC100571631	377.421	190.697	565.569	49.3069	43.8184	43.8167	9.69866e-07	-4.48337	3.86016e-11	0.0447064	6.01329
MSTRG.13439	LOC100159750	uncharacterized protein LOC100159750	1318.18	849.884	1624.76	85.4649	210.06	164.379	6.08719e-11	-4.47652	2.42276e-15	0.0449194	10.2156
MSTRG.6252	LOC100575704	uncharacterized LOC100575704	60.4206	64.0385	82.7869	7.34136	13.6939	5.34307	0.000440974	-4.45801	1.75512e-08	0.0454993	3.35559
MSTRG.14895	#N/A	#N/A	245.452	208.123	426.204	61.6514	36.0429	12.4316	0.00181844	-4.4518	7.23759e-08	0.0456955	2.7403
MSTRG.11489	LOC100164853	uncharacterized LOC100164853	284.105	220.651	566.949	24.441	52.6647	56.5086	7.39354e-05	-4.41983	2.9427e-09	0.0467194	4.13115
MSTRG.6839	LOC100168754	uncharacterized LOC100168754	3033.18	1317.72	2976.62	257.173	205.674	442.489	4.38137e-08	-4.38397	1.74383e-12	0.0478955	7.35839
MSTRG.2167	LOC100164067	uncharacterized LOC100164067	1825.16	691.309	1892.42	171.326	148.037	232.762	5.02172e-08	-4.37255	1.9987e-12	0.0482759	7.29915
MSTRG.2142	LOC100166702	uncharacterized LOC100166702	1166.26	777.862	1599.54	162.285	211.158	89.0049	4.5469e-11	-4.35726	1.80971e-15	0.0487903	10.3423
MSTRG.19049	LOC100161929	prolyl 4-hydroxylase subunit alpha-2-like	268.853	204.059	388.373	36.8705	29.4001	43.8298	5.71742e-08	-4.33984	2.27559e-12	0.049383	7.2428
MSTRG.19207	LOC100159939	uncharacterized LOC100159939	6788.26	3794.13	7948.1	774.475	670.02	920.027	2.19962e-17	-4.33792	8.75471e-22	0.0494488	16.6577
MSTRG.19209	LOC100168822	uncharacterized LOC100168822	17887.2	7984.71	16242.7	1544.79	1674.07	2183.25	3.12937e-15	-4.32688	1.24552e-19	0.0498287	14.5045
MSTRG.3307	LOC100574328	uncharacterized LOC100574328	546.499	232.272	738.801	56.0941	63.7761	77.4341	1.06033e-05	-4.32191	4.22021e-10	0.0500005	4.97456
MSTRG.19266	#N/A	#N/A	107.597	73.4346	169.128	10.8074	24.8298	11.2485	0.00131226	-4.3219	5.22292e-08	0.0500008	2.88198
MSTRG.24222	LOC100169595	aminopeptidase N-like	158.687	103.682	181.672	20.9923	11.6145	25.1821	5.92345e-05	-4.28067	2.35759e-09	0.0514506	4.22742
MSTRG.6826	LOC100572399	uncharacterized LOC100572399	6386.63	2675.74	6052.4	546.325	581.359	852.788	2.78678e-11	-4.27835	1.10917e-15	0.0515335	10.5549
MSTRG.17085	LOC100571324	uncharacterized LOC100571324	730.535	508.645	764.124	70.7864	87.0566	106.412	8.48455e-14	-4.27303	3.37694e-18	0.0517238	13.0714
MSTRG.8521	LOC100570396	craniofacial development protein 2-like	84.8415	68.9809	195.081	18.7113	18.2182	11.2508	0.00576552	-4.26737	2.29474e-07	0.0519272	2.23916
MSTRG.7863	Jhamt	juvenile hormone acid methyltransferase	238.098	104.14	88.1944	25.4038	16.0362	16.9011	0.00202168	-4.23985	8.04648e-08	0.0529271	2.69429
MSTRG.14886	LOC103309424	#N/A	103.803	84.5759	238.446	22.1	19.3559	17.033	0.00185352	-4.23932	7.37718e-08	0.0529464	2.732
MSTRG.24392	LOC115034951	#N/A	162.187	107.403	343.543	25.5542	32.6774	27.5704	0.000856171	-4.20863	3.40765e-08	0.0540849	3.06744
MSTRG.8602	#N/A	#N/A	118.945	64.547	124.355	11.9371	13.7823	17.0948	0.000299665	-4.19628	1.1927e-08	0.0545498	3.52336
MSTRG.19917	LOC100160737	cuticle protein-like	10415	4211.36	8847.82	1078.3	914.936	1247.98	1.08102e-12	-4.17312	4.30257e-17	0.0554327	11.9662
MSTRG.7748	NV22	#N/A	65.9876	58.7631	126.017	13.0281	12.6409	10.0652	0.00359463	-4.1554	1.4307e-07	0.0561176	2.44435
MSTRG.4694	LOC100168023	thyroid receptor-interacting protein 6-like	88.1238	66.0451	89.9229	11.8318	11.5268	11.0616	5.48532e-05	-4.15239	2.18321e-09	0.0562351	4.2608
MSTRG.19412	#N/A	#N/A	107.543	111.459	134.465	27.7298	11.5912	11.2654	0.000158492	-4.14778	6.30814e-09	0.0564149	3.79999
MSTRG.4309	LOC100573042	uncharacterized LOC100573042	347.385	231.983	352.66	56.0579	33.8374	43.806	8.55343e-09	-4.11395	3.40435e-13	0.0577536	8.06786
MSTRG.22887	LOC100569077	uncharacterized LOC100569077	1356.33	591.002	1357.32	162.276	134.727	177.104	2.7388e-09	-4.10146	1.09007e-13	0.0582555	8.56244
MSTRG.19440	LOC100572792	uncharacterized LOC100572792	182.076	151.049	302.441	31.1983	27.1556	34.5204	4.33218e-06	-4.08886	1.72425e-10	0.0587665	5.36329
MSTRG.17792	LOC100569502	uncharacterized LOC100569502	294.485	119.816	375.387	45.8913	30.5007	40.334	0.000983694	-4.05125	3.9152e-08	0.0603188	3.00714
MSTRG.18547	LOC100168923	uncharacterized LOC100168923	83.9258	68.9302	154.455	16.4429	22.5995	8.91599	0.00932394	-4.04552	3.71102e-07	0.0605588	2.0304
MSTRG.20792	LOC107883431	#N/A	130.346	84.5949	146.564	15.3302	24.8416	14.7349	4.58799e-05	-4.04462	1.82606e-09	0.0605965	4.33838
MSTRG.5154	LOC100161452	putative fatty acyl-CoA reductase CG5065-like	707.869	354.806	841.353	65.1378	128.01	92.5078	8.31148e-07	-4.04135	3.30805e-11	0.0607342	6.08032
MSTRG.19916	LOC100164113	cuticle protein-like	5563.25	2210.87	4926.39	619.718	573.591	700.899	1.73152e-11	-4.0198	6.89163e-16	0.0616482	10.7616
MSTRG.7663	LOC100164831	uncharacterized LOC100164831	208.751	87.0671	209.173	28.9105	28.2249	20.5728	0.000405825	-4.00488	1.61522e-08	0.0622891	3.39166
MSTRG.10032	LOC100169416	uncharacterized LOC100169416	373.929	209.487	354.63	70.7068	58.177	17.0939	0.00186971	-3.99996	7.44164e-08	0.0625016	2.72823
MSTRG.21421	LOC100568675	nose resistant to fluoxetine protein 6-like	428.59	182.74	364.292	71.8617	41.5921	36.8512	7.24189e-05	-3.98387	2.88235e-09	0.0632027	4.14015
MSTRG.17075	LOC100163848	uncharacterized LOC100163848	1419.43	775.435	1373.71	180.352	207.84	160.896	9.03139e-15	-3.98238	3.59458e-19	0.063268	14.0442
MSTRG.19679	ACYPI56506	#N/A	605.867	322.223	910.561	94.4969	77.0838	112.209	1.6626e-05	-3.95563	6.61733e-10	0.064452	4.77921
MSTRG.7053	LOC100573120	uncharacterized LOC100573120	1365.49	999.218	2793.38	187.141	329.734	301.08	2.23791e-06	-3.91345	8.9071e-11	0.0663644	5.65016
MSTRG.4346	LOC100302371	uncharacterized LOC100302371	337.165	101.808	293.431	36.8534	47.077	35.6781	0.00339623	-3.87503	1.35173e-07	0.0681554	2.469
MSTRG.3413	LOC100166545	uncharacterized LOC100166545	3108.26	2316.7	5176.28	391.584	532.579	776.276	3.79159e-08	-3.85684	1.50909e-12	0.0690199	7.42118
MSTRG.13068	LOC100161354	aminopeptidase N-like	108.82	59.7465	73.9782	11.8817	15.939	12.3434	0.00264847	-3.85045	1.05412e-07	0.0693263	2.577
MSTRG.12843	LOC100570639	thaumatin-like protein 1-like	135.573	70.6823	115.738	14.1268	22.604	16.8471	0.000864616	-3.83867	3.44126e-08	0.0698947	3.06318
MSTRG.19239	LOC100571995	uncharacterized LOC100571995	270.005	153.349	317.134	48.1307	34.9201	37.993	1.30012e-05	-3.83867	5.1746e-10	0.069895	4.88602
MSTRG.4452	LOC100169117	aminopeptidase N-like	524.78	379.291	620.68	66.2582	136.804	54.2428	1.30991e-06	-3.82619	5.21358e-11	0.0705022	5.88276
MSTRG.4113	NV12	#N/A	245.49	173.379	402.276	48.1225	60.3572	29.8463	0.000112416	-3.82377	4.47427e-09	0.0706206	3.94917
MSTRG.12860	LOC100163300	uncharacterized LOC100163300	802.048	599.987	1372.37	109.198	144.681	199.137	2.42458e-06	-3.82356	9.65005e-11	0.0706309	5.61536
MSTRG.21959	LOC100573495	uncharacterized LOC100573495	299.224	182.586	415.792	24.4392	53.7485	70.4273	0.00627862	-3.80902	2.49895e-07	0.0713461	2.20214
MSTRG.7067	LOC100160226	uncharacterized protein LOC100160226	728.455	612.244	1453.55	172.422	160.185	135.387	9.99826e-08	-3.80165	3.97941e-12	0.0717116	7.00008
MSTRG.882	LOC100573861	uncharacterized LOC100573861	1019.17	538.239	1311.28	89.9946	206.694	186.402	3.89453e-05	-3.78936	1.55006e-09	0.0723252	4.40955
MSTRG.20736	LOC100159932	uncharacterized protein LOC100159932	1527.63	1222.15	2941.82	196.178	350.801	406.6	4.5329e-06	-3.7805	1.80414e-10	0.0727707	5.34362
MSTRG.19009	LOC100302630	uncharacterized LOC100302630	270.961	146.617	323.859	27.8213	61.4371	37.9892	0.000487671	-3.77535	1.94098e-08	0.0730309	3.31187
MSTRG.17083	LOC100571776	uncharacterized LOC100571776	270.05	190.254	163.19	26.6841	56.9703	24.0766	8.56353e-05	-3.77531	3.40837e-09	0.0730331	4.06735
MSTRG.14759	LOC100570553	aminopeptidase N-like	466.34	271.409	426.567	78.6485	60.4284	61.2	2.82374e-08	-3.74771	1.12388e-12	0.0744437	7.54917
MSTRG.21445	LOC100164691	nose resistant to fluoxetine protein 6-like	295.296	347.622	394.866	76.3808	51.561	50.7713	2.68159e-09	-3.74109	1.0673e-13	0.0747861	8.57161
MSTRG.3168	LOC100160421	uncharacterized LOC100160421	3889.59	2956.78	6174.73	509.051	801.854	919.978	6.29026e-10	-3.73267	2.50358e-14	0.0752235	9.20133
MSTRG.8578	#N/A	#N/A	6076.81	3585.94	8576.41	879.517	1074.49	1185.42	3.35178e-11	-3.72737	1.33404e-15	0.0755006	10.4747
MSTRG.24442	LOC103309049	#N/A	317.389	134.239	330.248	41.3608	49.3008	46.0669	0.000299734	-3.72415	1.19297e-08	0.0756691	3.52326
MSTRG.21701	LOC100159315	troponin C-like	593.697	253.64	577.948	98.9906	90.3356	61.2096	1.99675e-05	-3.72178	7.94727e-10	0.0757935	4.69968
MSTRG.15429	LOC100159821	long-chain-fatty-acid--CoA ligase 1-like	359.565	260.17	300.864	53.8115	84.6977	27.5613	2.56826e-05	-3.70455	1.02219e-09	0.0767041	4.59036
MSTRG.5942	LOC103309259	#N/A	250.029	202.803	351.579	41.3814	64.7766	39.1718	2.43838e-06	-3.67224	9.70501e-11	0.0784413	5.6129
MSTRG.7064	LOC100160906	uncharacterized LOC100160906	1653.21	1374.98	3092.39	294.438	391.8	400.774	3.20162e-09	-3.66715	1.27428e-13	0.0787187	8.49463
MSTRG.3982	#N/A	#N/A	154.99	110.237	139.664	25.4801	39.1916	10.0714	0.00778912	-3.65338	3.10015e-07	0.0794739	2.10851
MSTRG.6567	LOC100302326	uncharacterized protein LOC100302326	274.656	173.593	477.791	78.5875	38.2677	49.5735	0.00887793	-3.65035	3.53351e-07	0.0796406	2.05169
MSTRG.20843	LOC100569533	uncharacterized LOC100569533	360.386	318.684	725.125	48.1856	79.2681	121.451	0.00747946	-3.64906	2.9769e-07	0.0797122	2.12613
MSTRG.10263	ACYPI37407	#N/A	941.909	499.879	932.585	137.419	153.517	136.556	8.41253e-10	-3.64549	3.34827e-14	0.0799095	9.07507
MSTRG.19865	Obp9	odorant-binding protein 9	276.746	136.435	298.534	28.9428	44.8631	54.1539	0.00184883	-3.6445	7.35854e-08	0.0799645	2.7331
MSTRG.10420	LOC100159087	uncharacterized LOC100159087	4501.02	3138.02	7206.41	668.305	796.332	1179.58	6.49435e-08	-3.63838	2.58482e-12	0.0803041	7.18746
MSTRG.11715	LOC100159063	uncharacterized protein LOC100159063	3386.65	2780.07	6516.24	525.99	699.912	1039.27	3.08738e-06	-3.63232	1.22881e-10	0.080642	5.51041
MSTRG.13980	LOC100167863	uncharacterized LOC100167863	3584.79	2799.27	5821.04	468.39	818.463	909.541	1.94862e-08	-3.63181	7.75569e-13	0.0806709	7.71027
MSTRG.1936	LOC100574813	uncharacterized LOC100574813	346.286	225.447	456.391	68.4911	52.6676	67.0191	9.50272e-06	-3.60342	3.78218e-10	0.082274	5.02215
MSTRG.20847	LOC100158947	uncharacterized LOC100158947	491.634	363.685	889.673	87.7178	104.758	127.241	5.85182e-05	-3.60034	2.32908e-09	0.0824498	4.23271
MSTRG.12788	LOC100163506	uncharacterized LOC100163506	1409.59	1749.57	3854.46	349.783	417.303	520.148	9.46759e-06	-3.58855	3.7682e-10	0.0831265	5.02376
MSTRG.24582	LOC100569694	possible pseudogene or miscRNA, No KEGG entry	10937.3	5999.14	15093	1481.53	2070.77	2357.09	2.01769e-08	-3.58055	8.03059e-13	0.0835886	7.69515
MSTRG.11355	LOC100573892	uncharacterized LOC100573892	1826.34	1148.41	738.435	275.069	245.496	173.496	9.24226e-08	-3.56603	3.67851e-12	0.0844341	7.03422
MSTRG.4501	LOC100570077	uncharacterized LOC100570077	121.073	84.2844	121.008	13.0394	30.3178	19.2695	0.00387342	-3.56177	1.54166e-07	0.0846841	2.41191
MSTRG.8810	LOC100570068	uncharacterized LOC100570068	427.36	225.788	302.324	63.8812	67.023	49.4513	1.1794e-06	-3.55918	4.69413e-11	0.0848362	5.92834
MSTRG.16915	LOC100160121	uncharacterized LOC100160121	5411.7	3901.73	5983.1	1175.39	1087.75	631.436	7.10418e-17	-3.55827	2.82754e-21	0.0848892	16.1485
MSTRG.7058	LOC100569515	uncharacterized LOC100569515	2553.38	1840.91	4688.37	416.429	544.75	727.596	3.56424e-06	-3.55689	1.4186e-10	0.084971	5.44803
MSTRG.24444	ACYPI45001	#N/A	2082.72	1124.26	2340.25	342.99	376.276	325.467	8.69815e-12	-3.55532	3.46195e-16	0.0850634	11.0606
MSTRG.7111	#N/A	#N/A	756.73	525.821	1296.36	145.331	175.676	165.539	1.45762e-06	-3.54773	5.80147e-11	0.0855117	5.83636
MSTRG.14641	LOC100159743	aminopeptidase N-like	260.482	181.427	388.54	42.5067	49.316	65.7914	0.000469253	-3.53262	1.86768e-08	0.0864122	3.32859
MSTRG.16287	LOC100168794	glycoprotein 3-alpha-L-fucosyltransferase A-like	185.096	147.397	146.964	18.753	45.8628	28.6866	0.000428432	-3.51577	1.7052e-08	0.0874277	3.36812
MSTRG.19678	ACYPI56502	#N/A	1142.89	464.042	1381.44	206.304	176.809	188.705	6.01773e-05	-3.51576	2.39512e-09	0.0874281	4.22057
MSTRG.13025	LOC100159048	uncharacterized LOC100159048	1295.03	534.773	771.404	237.883	161.285	101.781	0.000159749	-3.51556	6.35817e-09	0.0874404	3.79656
MSTRG.8786	LOC100570366	uncharacterized LOC100570366	220.065	139.665	224.896	32.3078	52.5414	29.8408	8.59411e-05	-3.50802	3.42054e-09	0.0878982	4.0658
MSTRG.10290	LOC100161104	bifunctional enzyme CarRP-like	2111.88	1864.19	1652.99	328.317	439.417	316.211	2.293e-25	-3.50673	9.12638e-30	0.0879768	24.6396
MSTRG.12964	LOC100163715	uncharacterized LOC100163715	9236.34	3616.29	6897.77	1439.7	1152.06	1195.83	1.75456e-09	-3.50425	6.98333e-14	0.0881282	8.75583
MSTRG.8396	LOC100166094	neuroendocrine convertase 1-like	243.447	245.294	386.252	43.6388	68.1143	57.686	5.45579e-06	-3.50381	2.17146e-10	0.0881553	5.26314
MSTRG.10638	LOC100164606	ubiquitin carboxyl-terminal hydrolase 2-like	301.119	246.454	243.771	58.2969	61.4616	34.5251	1.91392e-07	-3.49913	7.61758e-12	0.0884415	6.71808
MSTRG.8706	LOC100165393	uncharacterized LOC100165393	3094.98	2009.77	4860.84	449.185	685.474	800.651	8.88014e-07	-3.47244	3.53438e-11	0.0900933	6.05158
MSTRG.6499	LOC100162791	uncharacterized LOC100162791	3123.57	2163.47	3189.67	337.367	648.878	661.503	1.42679e-10	-3.46999	5.67876e-15	0.0902459	9.84564
MSTRG.6568	LOC100169287	uncharacterized LOC100169287	251.108	127.558	344.143	52.635	44.8699	44.9355	0.00386966	-3.46697	1.54016e-07	0.090435	2.41233
MSTRG.7914	LOC100160601	uncharacterized LOC100160601	223.519	189.415	456.003	47.0328	53.7483	70.4779	0.00627171	-3.44728	2.4962e-07	0.0916781	2.20261
MSTRG.19674	ACYPI39568	#N/A	6289.19	3227.06	7949.6	1060.22	1153.15	1244.51	2.40181e-09	-3.43857	9.55942e-14	0.0922335	8.61946
MSTRG.17082	LOC107882155	#N/A	280.327	238.57	413.281	71.8304	67.0258	48.4136	4.39275e-06	-3.43205	1.74836e-10	0.0926508	5.35726
MSTRG.14718	LOC100575663	uncharacterized LOC100575663	209.24	187.401	211.889	27.8116	49.2504	45.0314	1.01054e-05	-3.42935	4.02204e-10	0.0928245	4.99545
MSTRG.22915	LOC100162370	uncharacterized LOC100162370	189.619	139.888	296.887	41.3551	50.3608	36.8449	0.000634742	-3.40814	2.52634e-08	0.0941994	3.1974
MSTRG.5013	LOC100159668	uncharacterized LOC100159668	3871.56	2469.85	2056.74	472.858	834.976	405.369	1.21918e-09	-3.40571	4.85248e-14	0.0943578	8.91393
MSTRG.20369	LOC100162609	uncharacterized LOC100162609	2203.55	712.251	1131.85	301.11	233.335	277.776	0.000196776	-3.40219	7.8319e-09	0.0945886	3.70603
MSTRG.5241	LOC100572968	uncharacterized LOC100572968	518.339	262.418	451.337	80.908	62.652	102.872	0.000183997	-3.40083	7.32326e-09	0.0946778	3.73519
MSTRG.10891	LOC100168223	uncharacterized LOC100168223	5167.29	4270.62	4954.16	583.597	1046.75	1247.95	1.45784e-11	-3.39851	5.80235e-16	0.0948301	10.8363
MSTRG.11359	LOC100166921	esterase FE4-like	9130.13	4999.39	3166.59	1392.08	1617.4	587.331	0.000778507	-3.37181	3.09854e-08	0.0966016	3.10874
MSTRG.16351	LOC100573395	uncharacterized LOC100573395	479.427	234.507	680.906	110.265	95.8677	83.2274	0.0018766	-3.36187	7.46904e-08	0.0972693	2.72663
MSTRG.16653	LOC100169576	facilitated trehalose transporter Tret1-like	1355.26	650.925	491.087	223.103	171.239	128.339	0.000804846	-3.33039	3.20337e-08	0.0994149	3.09429
MSTRG.15669	LOC100169318	nose resistant to fluoxetine protein 6-like	1090.31	663.718	750.434	220.919	161.279	142.314	5.35299e-09	-3.32803	2.13054e-13	0.0995778	8.2714
MSTRG.7838	Cp22	cuticular protein 22	265.956	379.135	655.513	77.5332	88.1097	106.362	0.00121098	-3.32014	4.81984e-08	0.100124	2.91686
MSTRG.8707	LOC100167427	uncharacterized LOC100167427	4168.78	2810.79	6819.24	695.411	973.612	1221.34	4.00117e-06	-3.31065	1.5925e-10	0.100785	5.39781
MSTRG.12675	LOC100570783	uncharacterized LOC100570783	386.737	264.989	144.411	50.4155	60.3637	57.7806	0.0041629	-3.29634	1.65688e-07	0.10179	2.3806
MSTRG.23905	LOC100569104	angiotensin-converting enzyme-like	586.197	341.141	512.965	66.2578	137.904	105.233	4.9e-05	-3.28929	1.95025e-09	0.102288	4.3098
MSTRG.7472	LOC100160301	uncharacterized protein LOC100160301	584.047	361.637	932.655	130.629	130.233	142.362	0.000225859	-3.2752	8.98942e-09	0.103292	3.64616
MSTRG.19408	LOC100575164	angiotensin-converting enzyme-like	1643.87	1013.99	1942.34	248.125	391.744	356.747	1.85351e-08	-3.2546	7.37714e-13	0.104778	7.73201
MSTRG.15832	LOC100169280	actin	161560	90368.7	127542	26071.4	30573.1	26274.1	7.36821e-19	-3.23722	2.93262e-23	0.106047	18.1326
MSTRG.23194	ACYPI38370	#N/A	15709.8	7220.47	10204.4	2830.01	2600.46	1876.07	1.45982e-10	-3.22703	5.81021e-15	0.106799	9.8357
MSTRG.11699	LOC100574511	uncharacterized LOC100574511	598.381	369.307	722.976	93.3621	103.65	170.081	0.00105387	-3.22552	4.1945e-08	0.10691	2.97721
MSTRG.597	LOC100162393	uncharacterized LOC100162393	4004.13	1933.03	2763.57	711.159	756.35	469.172	7.67409e-10	-3.21711	3.05436e-14	0.107536	9.11497
MSTRG.13063	LOC100161264	aminopeptidase N-like	283.091	280.172	334.482	56.0597	89.1171	56.5533	9.57786e-07	-3.21445	3.81208e-11	0.107734	6.01873
MSTRG.21989	LOC100160554	uncharacterized LOC100160554	215.114	169.069	337.641	43.626	49.2939	66.9567	0.00539067	-3.21302	2.14554e-07	0.107841	2.26836
MSTRG.20473	LOC100159632	uncharacterized LOC100159632	2512.78	1978.13	4119.04	476.285	573.552	840.01	4.72285e-06	-3.2029	1.87974e-10	0.108601	5.3258
MSTRG.22484	#N/A	#N/A	357.038	320.086	367.376	92.0878	63.733	76.0899	3.16039e-07	-3.20168	1.25787e-11	0.108692	6.50026
MSTRG.5163	LOC100160501	elongation of very long chain fatty acids protein 4-like	1010.88	778.372	1095.51	304.435	174.591	166.639	1.42866e-07	-3.18842	5.68622e-12	0.109695	6.84507
MSTRG.16747	Cprr1-11	RR1 cuticle protein 11	1595.44	1954.5	2742.75	368.982	588.988	457.63	1.25869e-11	-3.18576	5.00972e-16	0.109898	10.9001
MSTRG.12852	#N/A	#N/A	958.199	453.621	605.091	166.731	216.559	78.59	0.002913	-3.18466	1.1594e-07	0.109982	2.53566
MSTRG.17597	LOC100168379	collagen alpha-2(IV) chain-like	12509.9	5947.02	6703.31	1560.57	2714.51	1442.67	1.86036e-07	-3.18018	7.4044e-12	0.110324	6.7304
MSTRG.12600	LOC100158720	glucose dehydrogenase [acceptor]-like	478.032	268.766	420.705	94.3751	96.9283	73.8143	7.43371e-06	-3.17751	2.95869e-10	0.110529	5.12879
MSTRG.21990	LOC100159160	uncharacterized LOC100159160	597.31	412.134	808.644	84.3393	191.079	141.189	0.000807251	-3.15352	3.21294e-08	0.112382	3.09299
MSTRG.8373	LOC100166530	troponin C-like	781.659	410.847	599.239	114.809	172.267	126.078	4.3683e-06	-3.1384	1.73863e-10	0.113566	5.35969
MSTRG.3129	LOC100166119	twitchin-like	3562.06	3635.05	4198.08	817.37	1125.35	706.777	2.10899e-23	-3.12356	8.39399e-28	0.11474	22.6759
MSTRG.8830	LOC100574565	uncharacterized LOC100574565	135.785	160.984	178.953	31.1761	38.1582	42.6332	0.000587069	-3.09976	2.33659e-08	0.116649	3.23131
MSTRG.22458	LOC100159353	angiotensin-converting enzyme-like	941.8	632.566	1099.72	170.172	217.76	236.203	2.59091e-07	-3.09318	1.03121e-11	0.117182	6.58655
MSTRG.12543	LOC100163140	G-protein coupled receptor Mth-like	430.019	251.698	319.632	107.805	90.2524	41.4061	0.00697553	-3.09102	2.77633e-07	0.117357	2.15642
MSTRG.17514	Cprr1-8	RR1 cuticle protein 8	173764	80478.4	118701	27808.5	35032.6	25592.5	6.11091e-11	-3.07618	2.4322e-15	0.11857	10.2139
MSTRG.5271	LOC100167736	uncharacterized LOC100167736	175027	86815.5	117079	24937.4	36681.6	28175.8	2.42271e-11	-3.0739	9.64262e-16	0.118758	10.6157
MSTRG.17057	LOC100159937	collagen alpha-1(XXII) chain-like	1125.11	771.697	1025.27	293.169	263.171	142.325	2.74286e-07	-3.07334	1.09169e-11	0.118805	6.5618
MSTRG.20195	LOC100158867	glucose dehydrogenase [acceptor]-like	2542.02	1919.67	4250.97	497.744	599.038	941.983	0.000251703	-3.0661	1.0018e-08	0.119402	3.59911
MSTRG.8405	LOC100159612	tropomyosin-2-like	15348.8	10155.7	11332.3	3802.5	3253.18	1788.06	1.14115e-10	-3.05891	4.54188e-15	0.119999	9.94266
MSTRG.5227	ACYPI38370	#N/A	14422.7	6065.16	10131.3	2729.48	2625.93	2003.52	2.33126e-08	-3.04719	9.27865e-13	0.120977	7.63241
MSTRG.18435	LOC100167379	#N/A	58935.3	38651.9	43401.5	12549.2	12716.3	8665.2	4.28797e-19	-3.04532	1.70665e-23	0.121134	18.3677
MSTRG.8597	LOC100165751	muscle LIM protein Mlp84B-like	13863.5	10514.5	12690	3707.62	3467.05	1864.54	1.85052e-13	-3.02903	7.36523e-18	0.12251	12.7327
MSTRG.8136	Mf	myofilin	9626.72	5855	9745.67	2366.97	1998.7	1786.9	4.62898e-14	-3.00959	1.84238e-18	0.124171	13.3345
MSTRG.15757	LOC100168430	venom protease-like	1659.54	715.64	1113.87	368.804	269.861	218.763	0.000105827	-2.99891	4.212e-09	0.125094	3.97541
MSTRG.5030	LOC100568818	mannan-binding lectin serine protease 2-like	489.238	240.916	421.206	88.7695	125.667	72.7127	0.00164455	-2.98617	6.54549e-08	0.126204	2.78395
MSTRG.10291	LOC100159050	phytoene dehydrogenase-like	5181.77	3802.25	2883.14	1121.11	1079.94	733.38	2.33396e-12	-2.98435	9.2894e-17	0.126363	11.6319
MSTRG.10782	LOC100169243	uncharacterized LOC100169243	31037.7	28822.4	43663.6	5610.91	8208.08	11612.3	5.15925e-07	-2.96414	2.05343e-11	0.128146	6.28741
MSTRG.13007	Mlc1	myosin alkali light chain 1	18824.9	10608.4	17910.7	3970.86	4130.9	3701.47	5.59929e-14	-2.96323	2.22857e-18	0.128226	13.2519
MSTRG.19398	LOC100159828	glucose dehydrogenase [acceptor]-like	1806.75	1033.65	1068.6	374.482	288.713	309.083	1.07292e-07	-2.95355	4.27033e-12	0.12909	6.96943
MSTRG.7653	Cp68	cuticular protein 68	17225.8	8217.44	17313.1	2568.06	4339.19	3835.71	3.145e-06	-2.94941	1.25174e-10	0.129461	5.50238
MSTRG.17070	LOC100161691	adenine nucleotide translocator-like	2257.91	1721.83	2024.4	559.833	581.228	383.445	6.70999e-16	-2.93826	2.67064e-20	0.130465	15.1733
MSTRG.8490	LOC100163274	troponin T-like	35143.4	22695.6	32576.3	9030.89	7872.27	6103.94	6.10847e-16	-2.92612	2.43123e-20	0.131568	15.2141
MSTRG.5235	LOC100166722	uncharacterized LOC100166722	389.836	221.987	484.078	98.9343	103.554	78.5547	0.00300947	-2.92402	1.1978e-07	0.13176	2.52151
MSTRG.19843	LOC100166650	troponin C-like	8836.01	6436.43	8186.38	2503.6	2342.19	1213.22	1.20266e-10	-2.9115	4.78672e-15	0.132908	9.91986
MSTRG.20780	LOC100164192	collagen alpha-2(I) chain-like	9191.35	6775.33	5097.01	1630.53	2327.73	1481.95	2.58417e-12	-2.89877	1.02853e-16	0.134086	11.5877
MSTRG.16472	LOC100167055	phosphate carrier protein, mitochondrial-like	683.112	422.415	718.423	148.698	236.444	94.8404	0.00238861	-2.89843	9.50693e-08	0.134117	2.62185
MSTRG.15987	LOC100169331	protein lethal(2)essential for life-like	3105.64	2458.06	3059.98	942.61	789.589	516.665	1.25899e-12	-2.88093	5.01092e-17	0.135754	11.9
MSTRG.11664	LOC100574123	uncharacterized LOC100574123	2380.29	1437.58	1048.57	443.264	407.258	408.39	3.55943e-06	-2.8712	1.41669e-10	0.136673	5.44862
MSTRG.10163	LOC100165811	peroxidase-like	1171.63	858.925	733.038	250.244	333.99	146.91	2.197e-05	-2.86879	8.74426e-10	0.136902	4.65817
MSTRG.21857	LOC100164372	muscular protein 20	9108.04	5690.35	8202.56	2011.15	2146.05	1858.62	6.24267e-17	-2.86354	2.48464e-21	0.137401	16.2046
MSTRG.11105	LOC100165066	actin-87E-like	12612.7	8069.57	9686.74	3014.07	3214.33	1805.36	3.20665e-12	-2.85887	1.27628e-16	0.137846	11.4939
MSTRG.21289	LOC100169317	uncharacterized LOC100169317	2017.38	1155.96	2236.62	380.268	637.677	417.065	2.65699e-06	-2.85574	1.05751e-10	0.138145	5.57561
MSTRG.13066	LOC100167585	uncharacterized LOC100167585	1378.19	584.154	892.572	345.072	253.208	164.34	0.00742131	-2.83639	2.95375e-07	0.140011	2.12952
MSTRG.10597	#N/A	#N/A	950.189	734.986	924.101	258.232	285.284	156.277	1.05369e-07	-2.83553	4.19381e-12	0.140094	6.97729
MSTRG.3515	LOC100164905	uncharacterized LOC100164905	12493.3	8267.04	12405.9	3397.04	3208.83	2265.54	3.17964e-14	-2.82757	1.26553e-18	0.14087	13.4976
MSTRG.15876	LOC100159647	paramyosin, long form-like	26377.6	17448.2	20080.5	6887.1	6429.32	3920.49	2.43449e-12	-2.81323	9.68952e-17	0.142277	11.6136
MSTRG.4983	LOC100162364	transmembrane protease serine 9-like	5044.71	1965.32	2610.26	927.883	949.145	734.336	0.000108003	-2.79016	4.29863e-09	0.14457	3.96656
MSTRG.16235	LOC100165074	myosin light chain-like	29626.1	20573.8	27856.7	8462.76	7643.94	5186.08	2.37784e-14	-2.78708	9.46404e-19	0.144879	13.6238
MSTRG.7624	LOC100159968	uncharacterized LOC100159968	18635.7	8777.59	11369.4	4241.8	3360.69	2921.4	2.31065e-07	-2.7855	9.1966e-12	0.145038	6.63627
MSTRG.5236	LOC100572394	uncharacterized LOC100572394	275.742	190.209	272.605	56.0142	78.0177	70.3361	0.0017424	-2.75951	6.93491e-08	0.147674	2.75885
MSTRG.16622	LOC103308562	#N/A	354.85	219.766	363.087	68.4834	97.9845	93.6456	0.00432754	-2.74744	1.72241e-07	0.148915	2.36376
MSTRG.14079	LOC100168026	heat shock protein 70 B2-like	3855.92	2548.13	3087.39	984.419	1016.73	644.125	4.78336e-12	-2.74554	1.90382e-16	0.149111	11.3203
MSTRG.1188	#N/A	#N/A	399.892	305.494	528.919	83.1931	156.661	106.487	0.00553036	-2.73337	2.20114e-07	0.150375	2.25725
MSTRG.6566	LOC100160413	TWiK family of potassium channels protein 18-like	607.91	333.302	536.737	120.428	151.199	139.957	0.000497664	-2.7279	1.98075e-08	0.150945	3.30306
MSTRG.7634	LOC100164760	uncharacterized LOC100164760	38457.1	16351.3	27769.6	7600.89	7045.53	8592.94	1.12869e-05	-2.69386	4.49231e-10	0.154549	4.94742
MSTRG.10828	LOC100573697	uncharacterized LOC100573697	909.718	722.392	1418.27	280.786	258.765	333.396	0.000369998	-2.66247	1.47263e-08	0.157949	3.4318
MSTRG.3311	LOC100167965	ryanodine receptor 44F-like	982.27	809.183	1036.54	301.135	334.024	193.363	1.67437e-07	-2.64751	6.66415e-12	0.159595	6.77615
MSTRG.11099	LOC100574272	uncharacterized LOC100574272	663.019	457.408	423.637	164.331	185.49	103.95	0.00053866	-2.64068	2.14392e-08	0.160353	3.26869
MSTRG.16952	LOC100162050	uncharacterized LOC100162050	369.189	245.343	321.67	69.5889	100.194	106.238	0.0072225	-2.6168	2.87463e-07	0.163029	2.14131
MSTRG.17682	LOC100167881	uncharacterized LOC100167881	8267.72	4000.45	5494.33	1962.45	1811.34	1488.8	2.37092e-07	-2.606	9.43651e-12	0.164254	6.62508
MSTRG.13731	LOC100162798	high affinity cationic amino acid transporter 1-like	14100.2	7672.31	6773.37	2977.89	3233.15	2392.78	1.44249e-06	-2.57072	5.74125e-11	0.16832	5.84089
MSTRG.18993	LOC100163560	uncharacterized LOC100163560	17652.1	10882.7	12931.6	3477.28	4198.47	4766.46	9.19545e-10	-2.55913	3.65988e-14	0.169678	9.03643
MSTRG.18219	LOC100159576	inositol oxygenase-like	2448.68	1653.05	1723.78	606.118	792.776	390.397	1.0828e-06	-2.55334	4.30964e-11	0.170361	5.96545
MSTRG.7631	LOC100166780	uncharacterized LOC100166780	8776.28	4233.38	5459.37	2102.51	1883.38	1627.88	1.09269e-06	-2.54953	4.34903e-11	0.170811	5.9615
MSTRG.10591	LOC100575643	uncharacterized LOC100575643	374.596	339.947	345.128	117.002	115.715	91.3529	4.14876e-05	-2.54492	1.65125e-09	0.171358	4.38208
MSTRG.11362	LOC100166763	15-hydroxyprostaglandin dehydrogenase [NAD+]-like	2895.57	1779.44	1315.58	691.571	687.539	465.197	0.000139954	-2.52819	5.57031e-09	0.173357	3.85401
MSTRG.2889	LOC100167645	uncharacterized LOC100167645	4355.74	3783.51	4337.72	1526.56	1427.87	955.915	4.91889e-14	-2.4967	1.95777e-18	0.177181	13.3081
MSTRG.24586	LOC100167750	muscular protein 20-like	2388.49	1588.65	2256.06	831.862	689.799	447.116	2.26428e-06	-2.48553	9.01208e-11	0.178559	5.64507
MSTRG.8058	LOC100160920	fatty acid synthase-like	22106.1	16417.3	14300.4	5740.64	5643.57	5180.09	8.67689e-15	-2.47627	3.45349e-19	0.179709	14.0616
MSTRG.14433	#N/A	#N/A	350.334	337.022	452.207	103.385	154.405	107.264	0.00187117	-2.45402	7.44745e-08	0.182501	2.72789
MSTRG.7364	#N/A	#N/A	684.535	498.101	449.026	189.196	216.491	120.217	0.00200707	-2.45021	7.98833e-08	0.182984	2.69744
MSTRG.9591	LOC100570163	uncharacterized LOC100570163	628.863	431.804	531.483	166.626	218.688	129.427	0.000582004	-2.44622	2.31643e-08	0.183491	3.23507
MSTRG.19611	LOC100165921	uncharacterized LOC100165921	13987.7	8176.43	8346.14	3360.78	3573.37	2830.84	4.39739e-09	-2.44364	1.75021e-13	0.183819	8.3568
MSTRG.5281	LOC100164538	uncharacterized LOC100164538	117311	53643.7	72324.2	24692.1	30527.5	23237.3	1.08489e-05	-2.43283	4.31796e-10	0.185202	4.96462
MSTRG.14983	LOC100159985	lactase-phlorizin hydrolase-like	5683.33	3649.9	2565.3	1609.9	1353.61	927.869	0.000751795	-2.4006	2.99222e-08	0.189386	3.1239
MSTRG.10475	LOC100216490	#N/A	1052.4	718.894	984.357	320.242	312.987	274.309	2.89712e-06	-2.38558	1.15308e-10	0.191367	5.53803
MSTRG.7637	LOC100160412	prickle-like protein 3-like	4788.3	3519.83	3601.2	1269.01	1599.57	1076.26	2.4577e-12	-2.38082	9.78191e-17	0.192001	11.6095
MSTRG.8060	LOC100158857	fatty acid synthase-like	26162.6	19703.5	16850.3	7624.57	7553	5573.01	4.72124e-12	-2.37542	1.8791e-16	0.19272	11.3259
MSTRG.5978	LOC100169571	lactase-phlorizin hydrolase-like	32271.6	19362.7	13806.9	8831.61	8507.12	5178.61	0.00425896	-2.3013	1.69511e-07	0.20288	2.3707
MSTRG.13748	LOC100168275	myophilin-like	837.84	1041.72	1699.29	382.414	410.515	430.735	0.00546264	-2.29847	2.17419e-07	0.203278	2.2626
MSTRG.18557	LOC100164626	glutathione S-transferase D4-like	4785.2	3615.84	4135.11	1576.23	1465.55	1275.69	7.04706e-14	-2.2877	2.8048e-18	0.204802	13.152
MSTRG.13172	LOC100575819	putative fatty acyl-CoA reductase CG5065-like	4319.21	4459.87	4935.32	2170.02	930.41	1589.36	0.00375316	-2.27471	1.49379e-07	0.206654	2.4256
MSTRG.10198	LOC100160532	uncharacterized LOC100160532	1110.1	758.078	987.385	329.244	431.434	242.998	0.000244756	-2.26965	9.74153e-09	0.20738	3.61127
MSTRG.5440	LOC100165963	ZM-domain protein	1617.33	1435.7	2002.75	699.748	684.184	393.833	2.36976e-05	-2.2675	9.4319e-10	0.207689	4.62529
MSTRG.16363	LOC100161052	uncharacterized LOC100161052	1626.87	1357.97	1583.14	431.038	717.347	454.045	1.04372e-06	-2.26727	4.15409e-11	0.207723	5.98142
MSTRG.19185	LOC100169432	uncharacterized LOC100169432	8812.65	6676.77	6412.96	3027.52	2502.85	2121.65	6.12663e-11	-2.25699	2.43846e-15	0.209209	10.2128
MSTRG.6642	LOC100162675	MFS-type transporter C6orf192-like	4848.13	2541.16	2432.23	1133.41	1325.84	1001.96	0.000533688	-2.24484	2.12413e-08	0.210977	3.27271
MSTRG.6039	LOC100168122	proton-coupled amino acid transporter 4-like	1306.85	1156.78	1410.65	384.739	391.725	567.635	0.000163862	-2.24377	6.52186e-09	0.211134	3.78552
MSTRG.10627	LOC100167755	uncharacterized LOC100167755	2006.2	1533.56	1774.37	656.87	699.714	524.763	1.11274e-09	-2.23909	4.42881e-14	0.21182	8.95361
MSTRG.20375	LOC100162252	uncharacterized LOC100162252	2293.31	1386.1	1757.99	639.899	634.376	643.964	2.39197e-06	-2.23114	9.52026e-11	0.21299	5.62125
MSTRG.20551	LOC100166868	uncharacterized LOC100166868	595.665	406.186	483.218	184.692	164.49	178.084	0.00510202	-2.21578	2.03065e-07	0.21527	2.29226
MSTRG.11466	LOC100158954	lysosomal alpha-mannosidase-like	14030.4	9252.45	5846.54	3385.54	4547.36	2563.04	0.00921941	-2.20937	3.66942e-07	0.216228	2.0353
MSTRG.7948	LOC100160088	chorion peroxidase-like	1510.11	901.237	1307.35	522.339	464.788	363.554	0.000388488	-2.18674	1.54622e-08	0.219647	3.41062
MSTRG.5752	ACYPI50196	#N/A	13414.4	13413.3	12834	5375.71	6062.33	3080.16	2.63737e-08	-2.18418	1.0497e-12	0.220038	7.57883
MSTRG.2152	LOC103309593	#N/A	1060.01	706.47	930.83	409.328	314.094	256.913	0.00157651	-2.18243	6.27467e-08	0.220305	2.8023
MSTRG.219	LOC107883749	#N/A	581.315	504.099	677.636	233.262	233.139	177.03	0.000765362	-2.18152	3.04622e-08	0.220443	3.11613
MSTRG.21243	LOC100167921	chorion peroxidase-like	5622.44	4102.62	3271.92	1602.17	2150.25	1055.48	0.000305776	-2.16337	1.21702e-08	0.223234	3.5146
MSTRG.19537	LOC100160598	uncharacterized LOC100160598	17227.7	11727.2	10831.7	5350.89	4746.99	4477.72	1.83595e-08	-2.15222	7.30727e-13	0.224966	7.73614
MSTRG.17413	LOC100165997	cyclase-like	1335.43	1152.91	1312.99	489.62	432.687	470.045	3.02109e-07	-2.14764	1.20242e-11	0.225681	6.51984
MSTRG.3475	#N/A	#N/A	1190.08	693.3	1142.75	418.482	328.533	369.355	0.00937051	-2.13889	3.72956e-07	0.227055	2.02824
MSTRG.15792	LOC100166560	4-coumarate--CoA ligase-like 9-like	946.521	785.346	1114.18	272.893	391.604	386.674	0.00126125	-2.13756	5.01991e-08	0.227264	2.8992
MSTRG.5114	LOC100168232	apolipoprotein D-like	15519.5	9061.36	13298.8	4814.48	4888.82	4346.92	1.546e-07	-2.13493	6.15321e-12	0.227678	6.81079
MSTRG.12212	LOC100571856	solute carrier family 46 member 3-like	940.353	646.536	792.682	242.298	353.869	289.061	0.001245	-2.13374	4.95522e-08	0.227867	2.90483
MSTRG.11428	LOC100161916	poly(A) RNA polymerase gld-2 homolog A-like	2033.64	1568.3	1957	767.478	684.231	615.052	2.39916e-08	-2.12799	9.54888e-13	0.228776	7.61994
MSTRG.21441	LOC100168063	histone H2A-like	509.655	516.163	442.465	197.099	183.291	166.539	0.000907093	-2.11885	3.61032e-08	0.23023	3.04235
MSTRG.8655	LOC100168076	protein bicaudal C homolog 1-like	2224.53	1458.99	1149.93	645.488	653.157	524.616	0.00128007	-2.09873	5.09482e-08	0.233464	2.89276
MSTRG.11342	LOC100165242	uncharacterized LOC100165242	1354.28	1032.77	866.934	412.882	445.915	372.88	7.87424e-05	-2.0889	3.13403e-09	0.235059	4.10379
MSTRG.21596	LOC100167666	growth arrest-specific protein 2-like	5372.63	3485.96	3246.29	1475.61	2018.36	1154.96	0.00011746	-2.07998	4.67502e-09	0.236518	3.93011
MSTRG.6995	LOC100162411	UDP-glucuronosyltransferase 1-6-like	2144.54	1555.24	1300.41	783.061	613.298	522.105	0.000491434	-2.06148	1.95596e-08	0.239571	3.30854
MSTRG.11145	LOC100159482	uncharacterized LOC100159482	1657.34	1045.14	1048.57	444.501	475.871	517.566	0.00192953	-2.05272	7.67971e-08	0.241029	2.71455
MSTRG.11266	LOC100166015	defense protein l(2)34Fc-like	2967.02	2706.27	2483.25	1054.33	1346.79	780.711	7.86129e-08	-2.04642	3.12887e-12	0.242085	7.10451
MSTRG.6205	LOC100158869	uncharacterized LOC100158869	1601.53	1256.54	1524.6	788.744	470.395	442.352	0.00668554	-2.03797	2.66091e-07	0.243505	2.17486
MSTRG.13166	LOC100166788	putative fatty acyl-CoA reductase CG5065-like	17284.3	15293	14394	7495.55	4145.32	6381.47	0.000224082	-2.0342	8.91869e-09	0.244143	3.64959
MSTRG.7826	Cp30	cuticular protein 30	1323.74	2213.78	1650.57	574.465	603.36	814.409	0.00490766	-2.02934	1.9533e-07	0.244968	2.30913
MSTRG.10148	LOC100162974	putative fatty acyl-CoA reductase CG5065-like	1509.28	877.508	1007.34	442.178	472.503	410.947	0.00270796	-2.02797	1.0778e-07	0.245201	2.56736
MSTRG.13688	LOC100168610	P protein-like	637.143	446.711	551.424	224.196	225.368	189.696	0.00917892	-2.02754	3.6533e-07	0.245272	2.03721
MSTRG.21872	LOC100160916	histone H2B 1/2-like	2246.68	2310.89	2969.42	1010.37	889.278	1026.49	8.60294e-07	-2.02315	3.42406e-11	0.24602	6.06535
MSTRG.20267	LOC100167687	uncharacterized LOC100167687	3055.86	1949.51	1926.33	768.666	1290.2	723.924	0.00670058	-1.99148	2.6669e-07	0.25148	2.17389
MSTRG.13380	LOC100162996	UDP-N-acetylglucosamine--peptide N-acetylglucosaminyltransferase 110 kDa subunit-like	880.755	602.89	613.909	288.544	307.35	246.401	0.00846549	-1.97322	3.36935e-07	0.254684	2.07235
MSTRG.8816	LOC100164494	uncharacterized LOC100164494	3196.42	2422.93	2011.67	939.168	1066.52	1041.29	9.1668e-06	-1.96929	3.64848e-10	0.255378	5.03778
MSTRG.18980	LOC100573770	uncharacterized LOC100573770	1027.89	714.35	680.14	347.29	314.062	309.018	0.00686998	-1.96804	2.73432e-07	0.255601	2.16304
MSTRG.24345	Tor	carotene dehydrogenase	27653.6	22751.9	20603.8	9292.69	12129.8	7479.19	1.27828e-08	-1.95461	5.08768e-13	0.257991	7.89337
MSTRG.134	LOC100166127	uncharacterized LOC100166127	4235.35	3068.71	3564.43	1285.9	1187.41	1855.63	0.00239025	-1.95269	9.51344e-08	0.258334	2.62156
MSTRG.15994	LOC100167996	muscle M-line assembly protein unc-89-like	1117.01	1276.23	1504.47	490.899	629.815	469.258	4.32398e-05	-1.94495	1.72099e-09	0.259724	4.36412
MSTRG.14304	LOC100159588	uncharacterized LOC100159588	4032.85	2637.5	1939.8	1254.1	1222.76	1040	0.00858093	-1.9291	3.4153e-07	0.262592	2.06647
MSTRG.17038	LOC100166221	alpha-aminoadipic semialdehyde synthase, mitochondrial-like	10119.1	6672.9	5596.96	2873.83	3905.64	2474.76	0.000782781	-1.9207	3.11555e-08	0.264126	3.10636
MSTRG.8809	LOC100163673	glucose dehydrogenase [acceptor]-like	1924.64	1294.44	1171.97	599.086	698.51	519.735	0.00167412	-1.91105	6.66315e-08	0.265899	2.77621
MSTRG.17511	LOC100169171	cuticular protein-like	47166.8	35595	41808.6	15555.8	20788.4	15298.7	1.06303e-09	-1.91067	4.23096e-14	0.265968	8.97345
MSTRG.9698	LOC100165583	uncharacterized LOC100165583	2382.61	2724.63	2312.29	1165.04	925.834	965.061	1.27542e-07	-1.90294	5.07631e-12	0.267398	6.89435
MSTRG.5414	LOC100166649	dynamin-1-like protein-like	2921.74	2235.17	2274.15	985.448	1152.91	960.217	1.48239e-07	-1.89066	5.90006e-12	0.269684	6.82904
MSTRG.9854	#N/A	#N/A	1122.33	1262.24	1276.37	437.572	581.029	507.75	3.43752e-05	-1.88745	1.36817e-09	0.270284	4.46375
MSTRG.19502	LOC100571471	uncharacterized LOC100571471	657.434	734.954	785.596	274.696	296.275	337.697	0.00921428	-1.87374	3.66737e-07	0.272865	2.03554
MSTRG.15749	LOC100169082	uncharacterized LOC100169082	935.309	737.968	817.509	385.655	370.524	297.454	0.00154894	-1.86556	6.16494e-08	0.274417	2.80997
MSTRG.9568	LOC100165656	tolloid-like protein 2-like	5499.44	9604.91	6929.39	3141.46	2712.28	3333.22	0.00054363	-1.86429	2.1637e-08	0.274659	3.2647
MSTRG.17855	LOC100168487	reticulon-4-interacting protein 1 homolog, mitochondrial-like	9555.66	6333.28	5458.35	3245.34	3067.95	2689.11	0.000147272	-1.86206	5.86159e-09	0.275083	3.83188
MSTRG.15915	LOC100159835	prestin-like, active transporters; similar to sulfate transporter	4098.48	3311.61	3063.31	1233.97	1338.08	1813.97	0.000910061	-1.85221	3.62213e-08	0.276967	3.04093
MSTRG.20115	LOC100144890	macrophage migration inhibitory factor-like protein	2850.55	2677.82	2751.7	1437.27	1125.29	969.844	1.33988e-06	-1.84173	5.33284e-11	0.278987	5.87294
MSTRG.14864	LOC100159178	lactase-phlorizin hydrolase-like	7219.98	4584.31	5799.32	2598.24	3129.89	1875.81	0.000265053	-1.83628	1.05494e-08	0.280043	3.57667
MSTRG.7257	LOC100166426	fatty acid synthase-like	61279.3	55680.9	53485.2	30385.6	18490.1	24381.1	0.000168675	-1.80502	6.71344e-09	0.286177	3.77295
MSTRG.19856	LOC100165050	endothelin-converting enzyme 1-like	1421.17	1530.85	1171.52	498.734	712.887	579.039	0.000321344	-1.80259	1.27898e-08	0.28666	3.49303
MSTRG.3341	LOC100168188	uncharacterized LOC100168188	8795.56	6238.26	7140.86	3007.24	4061.9	2652.39	4.48467e-06	-1.80021	1.78494e-10	0.287133	5.34827
MSTRG.8310	LOC100161480	cytochrome P450 6a2-like	1443.92	1099.13	1165.64	570.907	546.745	499.073	0.000307474	-1.79362	1.22378e-08	0.288448	3.51219
MSTRG.17740	LOC100161434	androgen-induced gene 1 protein-like	2649.92	2305.94	2408.13	1125.41	1044.36	1051.67	1.48277e-07	-1.78124	5.90157e-12	0.290934	6.82893
MSTRG.11906	LOC100166678	uncharacterized LOC100166678	12854.9	11344.6	10988.4	4059.98	6999.74	4519.37	1.90366e-05	-1.77894	7.57676e-10	0.291398	4.72041
MSTRG.19962	LOC100164049	laccase-5-like	3957.96	2678.41	2753.96	1451.8	1488.69	1251.01	7.40375e-05	-1.74856	2.94677e-09	0.297599	4.13055
MSTRG.20102	LOC100162394	macrophage migration inhibitory factor-like	1218.19	1019.51	1158.13	564.176	597.636	381.067	0.00580877	-1.72609	2.31195e-07	0.30227	2.23592
MSTRG.24548	LOC100168987	UDP-glucuronosyltransferase 2B13-like	1883.64	1846.88	1390.87	859.977	707.474	730.762	0.000450126	-1.72278	1.79155e-08	0.302964	3.34667
MSTRG.5229	LOC100160110	uncharacterized LOC100160110	3700.72	3248.27	4580.19	1541.27	2002.88	1694.1	3.87191e-05	-1.71547	1.54106e-09	0.304504	4.41207
MSTRG.17986	LOC103308996	#N/A	4846.68	4217.25	4002.66	2378.98	1749.22	1798	1.79777e-05	-1.70446	7.1553e-10	0.306836	4.74527
MSTRG.21974	LOC100163247	lipase 3-like	9484.57	7374.1	6932.37	3711.87	2882.97	4150.32	0.00335372	-1.69449	1.33482e-07	0.308963	2.47447
MSTRG.6858	LOC100163859	uncharacterized LOC100163859	2169.77	1777.03	1471.26	762.886	916.815	803.566	0.000498111	-1.68846	1.98253e-08	0.310257	3.30267
MSTRG.18020	LOC100159244	slit homolog 3 protein-like	1168.21	1128.42	948.884	421.942	608.676	466.737	0.00694598	-1.68286	2.76457e-07	0.311464	2.15827
MSTRG.21455	LOC103311944	#N/A	1340.09	1200.21	1369.89	594.599	571.136	625.18	0.000909619	-1.68156	3.62037e-08	0.311745	3.04114
MSTRG.7903	Hibadh	#N/A	3240.62	2590.71	2532.45	1205.68	1500.82	1164.18	7.92642e-06	-1.6766	3.15479e-10	0.312819	5.10092
MSTRG.22005	LOC100571110	uncharacterized LOC100571110	1795.88	1547.85	1532.83	875.752	788.298	596.425	0.000464069	-1.67436	1.84704e-08	0.313304	3.33342
MSTRG.10410	LOC100164852	gamma-glutamyltranspeptidase 1-like	1957.21	1639.05	1968.13	832.938	912.41	835.017	2.46346e-05	-1.6663	9.80482e-10	0.315061	4.60845
MSTRG.18997	LOC100161508	uncharacterized LOC100161508	37239.4	22976.6	30517.1	11470.5	15115.4	15541.8	0.00786843	-1.65723	3.13171e-07	0.317048	2.10411
MSTRG.5404	LOC100161704	facilitated trehalose transporter Tret1-like	9886.82	7320.86	6831.68	3500.6	4725.66	3105.03	0.000215469	-1.64645	8.57588e-09	0.319426	3.66661
MSTRG.6989	LOC100160380	UDP-glucuronosyltransferase 2B10-like	16921.1	12060	10575.5	6287.09	7613.73	4793.95	0.00248431	-1.64206	9.88779e-08	0.320398	2.60479
MSTRG.11431	LOC100163252	esterase FE4-like	2643.54	2075.09	1641.83	1037.23	1131.78	826.813	0.00535922	-1.64077	2.13302e-07	0.320685	2.2709
MSTRG.19283	LOC100162963	solute carrier family 15 member 2-like	10556.7	7613.5	6938.86	4313.71	4608.25	3114.43	0.00105237	-1.60914	4.18852e-08	0.327794	2.97783
MSTRG.9088	LOC100165363	acyl-CoA synthetase family member 2, mitochondrial-like	11016.7	11582.9	10502.6	5969.66	5066.08	4745.24	4.01304e-08	-1.60381	1.59723e-12	0.329006	7.39653
MSTRG.10907	LOC100167406	protein white-like	4969.45	3655.98	3138.65	1869.72	2060.49	1771.29	0.00122161	-1.57326	4.86211e-08	0.336047	2.91307
MSTRG.11680	LOC100158702	uncharacterized LOC100158702	2896.26	3466.08	2588.59	1417.82	1830.96	1134.97	0.000876487	-1.56621	3.4885e-08	0.337693	3.05725
MSTRG.4965	LOC100162692	fatty acid synthase-like	15114.8	16163.7	13750.4	8945.66	6182.11	6906.4	0.000415939	-1.54063	1.65548e-08	0.343735	3.38097
MSTRG.23187	LOC100159560	Cystathionase-like	16461.6	13460.3	10934.6	7163.42	7461.94	5563.25	0.000207665	-1.53938	8.26527e-09	0.344033	3.68264
MSTRG.11790	LOC100166874	ATP-binding cassette sub-family G member 4-like	4042.76	3696.18	4150.79	2026.56	1687.14	2128.91	0.000715337	-1.52802	2.84711e-08	0.346753	3.14549
MSTRG.7353	LOC100160265	Asparagine synthase	2431.46	2219.11	1837.85	1121.1	1157.31	944.47	0.000305799	-1.5249	1.21711e-08	0.347502	3.51456
MSTRG.17225	#N/A	#N/A	7042.27	6628.35	8359.19	3135.93	3778.26	3983.47	0.000426566	-1.5239	1.69777e-08	0.347745	3.37001
MSTRG.9848	LOC100162193	uncharacterized LOC100162193	13412.9	14160.4	10244.8	6483.38	6558.77	5743.64	5.11462e-06	-1.5182	2.03567e-10	0.349122	5.29119
MSTRG.11030	LOC100161043	trehalase-like	4746.52	4889.97	4075.7	1957.91	2283.29	2564.99	0.000559494	-1.50748	2.22684e-08	0.351725	3.2522
MSTRG.5893	LOC100164029	decaprenyl-diphosphate synthase subunit 2-like	1388.34	1334.82	1111.78	634.034	695.144	611.127	0.00876525	-1.48148	3.48866e-07	0.358122	2.05724
MSTRG.9853	LOC100160152	uncharacterized protein LOC100160152	15122.7	15944.6	10221.2	6934.06	7398.78	6568.71	0.00100502	-1.47659	4.00007e-08	0.359338	2.99783
MSTRG.7872	LOC100159277	delta-1-pyrroline-5-carboxylate synthase-like	23197.9	18848.2	16525.6	8043.5	11867.1	9860.37	0.00292762	-1.47578	1.16522e-07	0.359539	2.53349
MSTRG.19617	LOC100165054	lipoamide acyltransferase component of branched-chain alpha-keto acid dehydrogenase complex, mitochondrial-like	25897.5	17824.7	17420.8	9642.77	11346.3	10073.7	0.00253392	-1.47479	1.00853e-07	0.359786	2.59621
MSTRG.21787	LOC100165320	2-oxoisovalerate dehydrogenase subunit beta, mitochondrial-like	8058.75	6372.86	5927.05	3736.61	3841.37	2836.38	0.000294874	-1.46957	1.17363e-08	0.36109	3.53036
MSTRG.6689	LOC100572218	tubulin alpha chain-like	3341.45	2657.31	2872.7	1536.56	1407.83	1576.71	0.00219614	-1.4577	8.74087e-08	0.364073	2.65834
MSTRG.15814	LOC100159664	mitochondrial 2-oxoglutarate/malate carrier protein-like, active transporters; similar to 2-oxoglutarate carrier protein	11223.3	10924.8	13863.7	6020.5	6154.3	6253.84	9.55907e-05	-1.4563	3.8046e-09	0.364428	4.01958
MSTRG.17927	LOC100164806	2-oxoisovalerate dehydrogenase subunit alpha, mitochondrial-like	6239.48	4920.48	4630.54	2894.03	3103.26	2148.01	0.00116104	-1.45563	4.62107e-08	0.364597	2.93515
MSTRG.14294	LOC100162864	putative inorganic phosphate cotransporter-like, Organic acid transporter; sodium-dependent inorganic; similar to AGAP007732-PA	12587.9	11799.9	9808.86	6848.28	6391.4	4423.07	0.00109235	-1.45064	4.34767e-08	0.36586	2.96164
MSTRG.21647	LOC100162529	leucine-rich repeat-containing protein 58-like	6578.07	4766.74	4427.62	2587.01	2803.02	2709.02	0.00523086	-1.44776	2.08193e-07	0.36659	2.28143
MSTRG.10413	LOC100168687	gamma-glutamyltranspeptidase 1-like	3153.63	3826.74	3949.95	1808.69	1872.12	1929.87	0.00032053	-1.44624	1.27574e-08	0.366976	3.49413
MSTRG.18208	LOC100159541	acyl-CoA synthetase short-chain family member 3, mitochondrial-like	7380.07	8280.72	6813.12	4096.96	3638.67	3865.38	2.74336e-05	-1.43006	1.09189e-09	0.371115	4.56172
MSTRG.16214	LOC100163118	uncharacterized LOC100163118	2604.58	2385.82	2361.6	1292.51	1315.77	1248.54	0.00022271	-1.40528	8.86407e-09	0.377544	3.65226
MSTRG.6749	LOC100160310	titin-like	11722.3	10163.7	12354.7	6352.69	6693.94	5243.83	5.21968e-05	-1.38006	2.07748e-09	0.384202	4.28236
MSTRG.21574	LOC100166950	uncharacterized LOC100166950	29201.8	27583	28059.9	12752.3	20344.8	12577.1	0.00593795	-1.37476	2.36336e-07	0.385618	2.22636
MSTRG.12634	LOC100167199	uncharacterized LOC100167199	10830.8	10832.6	9069.87	5886.08	5298.76	5191.36	4.2215e-05	-1.36865	1.6802e-09	0.387254	4.37453
MSTRG.9986	Awd1	abnormal wing discs 1	12687.8	11072.4	11538.7	6517.47	6734.95	5690.87	4.92406e-06	-1.36437	1.95982e-10	0.388404	5.30768
MSTRG.21383	LOC100162568	acyl-CoA synthetase family member 2, mitochondrial-like	4402.16	3836.02	3785.56	2188.16	2101.52	2260.18	0.00177404	-1.31945	7.06084e-08	0.400686	2.75104
MSTRG.21886	LOC100159582	uncharacterized LOC100159582	6876.66	6819.58	6274.58	3262.08	3787.05	3944.13	0.00126343	-1.29775	5.02858e-08	0.40676	2.89845
MSTRG.578	LOC100167470	estradiol 17-beta-dehydrogenase 12-like	6966.91	5729.45	5583.63	3431.68	3980.92	2961.46	0.00350579	-1.2539	1.39534e-07	0.419314	2.45521
MSTRG.24732	LOC100574604	possible pseudogene or miscRNA, No KEGG entry	5538.24	5641.41	5088.67	2983.27	3774.75	2940.38	0.00649463	-1.1475	2.58493e-07	0.451406	2.18745
MSTRG.17434	LOC100168393	cohesin subunit SA-1-like	5067.91	6076.47	4778.17	9199.23	10046.8	9027.3	0.00838864	1.13398	3.33876e-07	2.19463	2.07631
MSTRG.10933	LOC100572661	uncharacterized LOC100572661	2835.3	3455.3	3167.79	5879.75	6064.94	5505.66	0.00150157	1.21188	5.9764e-08	2.31639	2.82345
MSTRG.12780	LOC100161018	catenin alpha-like	3895.01	4586.97	3430.55	7217	7459.11	7335.23	0.00556216	1.22236	2.2138e-07	2.33327	2.25476
MSTRG.12242	LOC100167987	#N/A	2901.42	3419.13	2567.24	5307.01	5658.23	5699.61	0.00703974	1.25397	2.80188e-07	2.38496	2.15244
MSTRG.15061	LOC100169478	GDP-fucose protein O-fucosyltransferase 1-like	1118.98	1165.77	1026.11	2073.24	2168.41	2098.85	0.00635425	1.29405	2.52906e-07	2.45215	2.19694
MSTRG.21947	LOC100165422	uncharacterized LOC100165422	2150.32	2507.87	2259.97	4473.24	4925.53	4008.85	0.00010924	1.30895	4.34786e-09	2.47762	3.96162
MSTRG.15268	LOC100160507	lamin Dm0-like	3671.37	4498.06	3412.28	7640.38	8111.72	6863.51	0.000166564	1.32909	6.62942e-09	2.51245	3.77842
MSTRG.7676	LOC100162750	uncharacterized LOC100162750	1551.09	1927.43	1351.61	3272.8	3883.68	2776.33	0.00272529	1.42904	1.08469e-07	2.69267	2.56459
MSTRG.9442	LOC100160566	choline transporter-like protein 1-like	2776.79	3258.49	2599.31	6033.35	6388.45	5791.89	9.84905e-07	1.49277	3.92002e-11	2.81429	6.00661
MSTRG.18338	LOC100163007	serpin B8-like	988.688	939.888	926.286	1959.39	2124.01	1963.96	6.58626e-05	1.49922	2.6214e-09	2.8269	4.18136
MSTRG.5454	LOC100166396	b-box type zinc finger protein ncl-1-like	3391.09	4220.28	2634.61	7289.24	8749.83	5994.84	0.00215017	1.52159	8.55789e-08	2.87106	2.66753
MSTRG.1718	LOC100167154	abnormal spindle-like microcephaly-associated protein homolog	1761.53	2388.54	1668.75	4216.73	4542.04	3740.96	0.000107358	1.52742	4.27294e-09	2.88269	3.96917
MSTRG.10067	LOC100162314	uncharacterized LOC100162314	1358.57	1624.89	1262.91	3269.28	3134.75	2892.01	8.41573e-06	1.57117	3.34954e-10	2.97145	5.07491
MSTRG.9461	LOC100160577	uncharacterized LOC100160577	3420.3	3419.5	3983.32	7717.43	7890.16	8118.9	7.24842e-07	1.57395	2.88494e-11	2.97718	6.13976
MSTRG.5119	LOC100165456	RNA-binding protein 38-like	1555.68	1327.14	1928.62	3594.17	4115.39	3336.27	9.16788e-05	1.65367	3.64891e-09	3.14633	4.03773
MSTRG.17562	LOC100163021	uncharacterized LOC100163021	540.457	778.767	641.766	1453.07	1453.6	1579.31	0.00399735	1.6715	1.59098e-07	3.18546	2.39823
MSTRG.5438	#N/A	#N/A	3186.44	2708.29	2093.1	5717.95	5989.54	6701.3	0.000168491	1.6887	6.70612e-09	3.22367	3.77342
MSTRG.8398	LOC100167513	protein mab-21-like	615.035	754.045	588.384	1432.78	1544.39	1560.8	0.000237822	1.69625	9.46557e-09	3.24057	3.62375
MSTRG.21724	LOC100163242	uncharacterized LOC100163242	2140.84	2717.16	1714.43	5460.21	5300.13	4663.58	1.25728e-05	1.71638	5.00411e-10	3.28612	4.90057
MSTRG.14322	LOC100573359	uncharacterized LOC100573359	1650.09	1424.93	1947.67	4546.84	4262.81	3167.57	3.50524e-05	1.72955	1.39512e-09	3.31624	4.45528
MSTRG.19229	LOC100165142	inositol-3-phosphate synthase 1-like	886.711	952.359	946.911	1990.1	2235.97	2438.14	6.3609e-06	1.76185	2.5317e-10	3.39132	5.19648
MSTRG.7107	LOC100161316	hemicentin-2-like	1769.98	1835.38	1431.34	5344.76	3485.15	3296.87	0.00100834	1.76922	4.01328e-08	3.40869	2.99639
MSTRG.8849	LOC100158984	LIM/homeobox protein Lhx5-like	520.596	738.46	532.913	1293.12	1356.14	1678.57	0.00981471	1.79497	3.90635e-07	3.47007	2.00812
MSTRG.5421	LOC100167833	uncharacterized LOC100167833	3023.2	2529.43	1816.8	5767.54	5991.71	6633.9	5.74289e-05	1.85448	2.28573e-09	3.61622	4.24087
MSTRG.14774	LOC100574099	ring canal kelch homolog	276.19	354.932	279.349	774.659	770.978	953.307	0.00115602	2.06045	4.60109e-08	4.17115	2.93703
MSTRG.9490	LOC100168182	protein inscuteable homolog	511.28	509.972	373.505	1132.22	1317.1	1433.43	3.75198e-05	2.08379	1.49333e-09	4.2392	4.42574
MSTRG.6152	LOC100164519	reversion-inducing cysteine-rich protein with Kazal motifs-like	783.953	1055.41	540.768	2266.91	2168.32	2503.87	0.000103813	2.18594	4.13187e-09	4.55023	3.98375
MSTRG.15816	#N/A	#N/A	161.989	160.453	179.389	485.702	466.199	538.249	0.0012576	2.21038	5.00539e-08	4.62799	2.90046
MSTRG.7002	LOC100168810	protein Wnt-2-like	314.92	557.009	415.336	1353.98	1200.85	1364.4	6.93181e-05	2.27117	2.75893e-09	4.82715	4.15915
MSTRG.2863	LOC100167373	uncharacterized LOC100167373	162.981	205.244	111.054	528.053	510.347	479.27	0.00347606	2.3471	1.38351e-07	5.08802	2.45891
MSTRG.14118	LOC100163791	endoplasmic reticulum aminopeptidase 2-like	223.34	341.38	222.477	774.495	881.546	931.956	2.47387e-05	2.42879	9.84625e-10	5.38443	4.60662
MSTRG.19140	LOC100165876	mitogen-activated protein kinase kinase kinase 15-like	63.8459	83.9438	79.3288	258.699	267.637	238.405	0.00167256	2.46638	6.65697e-08	5.52654	2.77662
MSTRG.22004	LOC100166012	uncharacterized LOC100166012	215.86	327.591	209.691	835.693	630.405	1093.17	0.00367167	2.5225	1.46136e-07	5.74575	2.43514
MSTRG.5158	LOC100167113	elongation of very long chain fatty acids protein 4-like	104.42	122.223	88.4103	320.087	496.545	293.552	0.0015708	2.53796	6.25195e-08	5.80768	2.80388
MSTRG.20994	#N/A	#N/A	377.135	424.785	419.25	1325.72	1756.66	1265.34	2.00616e-12	2.56729	7.98473e-17	5.92695	11.6976
MSTRG.8472	#N/A	#N/A	56.3078	67.0437	81.507	238.207	278.526	213.638	0.00231079	2.57715	9.19719e-08	5.9676	2.63624
MSTRG.5716	LOC100570620	uncharacterized LOC100570620	114.803	143.552	129.32	447.161	509.059	422.216	4.91801e-06	2.57886	1.95741e-10	5.97468	5.30821
MSTRG.17713	#N/A	#N/A	125.211	133.382	96.3051	362.481	495.637	415.91	6.61873e-05	2.59855	2.63432e-09	6.05678	4.17923
MSTRG.60	LOC115033048	#N/A	78.9662	70.4281	98.5174	301.302	302.01	307.01	0.000333096	2.64984	1.32576e-08	6.27599	3.47743
MSTRG.6333	LOC100161686	nucleolysin TIA-1 isoform p40-like	639.448	897.25	427.319	2448.33	2840.57	2020.07	7.65446e-08	2.66902	3.04655e-12	6.35997	7.11609
MSTRG.19105	LOC100575278	uncharacterized LOC100575278	250.744	243.579	266.636	893.729	778.745	1127.37	5.79771e-07	2.66917	2.30755e-11	6.36062	6.23674
MSTRG.3670	LOC100163544	beta-hexosaminidase subunit beta-like	84.7177	68.0407	91.3144	377.841	239.119	290.085	0.00379558	2.67906	1.51068e-07	6.40437	2.42072
MSTRG.21925	LOC100169359	zinc finger protein 235-like	99.71	131.149	142.864	476.226	456.05	466.727	1.2497e-05	2.68739	4.97395e-10	6.44146	4.90319
MSTRG.4872	LOC100160747	uncharacterized LOC100160747	2221.03	2195.39	1144.86	6367.06	6587.79	7695.9	3.90863e-08	2.68853	1.55567e-12	6.44657	7.40798
MSTRG.7651	LOC100161332	uncharacterized LOC100161332	1542.55	2720.38	2054.08	6608.2	6343.09	10740.1	6.57943e-06	2.72732	2.61868e-10	6.62222	5.18181
MSTRG.16156	LOC100168286	uncharacterized LOC100168286	535.693	1031.83	536.224	2774.69	3071.03	2437.93	1.62923e-08	2.79154	6.48452e-13	6.92369	7.78802
MSTRG.21518	LOC100160619	t-box transcription factor TBX10-like	103.544	97.333	79.14	348.433	483.118	281.132	5.39596e-05	2.79217	2.14764e-09	6.92669	4.26793
MSTRG.5717	LOC100570709	uncharacterized LOC100570709	230.893	176.204	174.787	720.342	894.565	742.631	1.05762e-09	2.84357	4.20944e-14	7.17795	8.97567
MSTRG.19606	LOC100569250	uncharacterized LOC100569250	111.98	122.176	107.689	495.416	433.938	458.862	1.41151e-07	2.86949	5.61797e-12	7.30805	6.85031
MSTRG.8948	LOC100163012	innexin inx1-like	1165.03	1697.12	1239.24	5499.79	5094.01	6345.61	1.99468e-16	2.91002	7.93904e-21	7.51631	15.7001
MSTRG.16398	LOC100168792	MOXD1 homolog 1-like	1457.58	1974.92	1529.14	6614.24	6558.94	7451.36	1.43285e-21	2.91716	5.70287e-26	7.55359	20.8438
MSTRG.9167	LOC103309182	#N/A	830.999	1505.75	940.093	4769.77	4829.93	4204.08	4.39182e-14	2.93427	1.74799e-18	7.64371	13.3574
MSTRG.1355	LOC100165865	teneurin-3-like	85.5351	97.4922	146.483	374.169	443.914	585.138	0.000548274	2.96895	2.18219e-08	7.82964	3.261
MSTRG.16404	LOC100159241	uncharacterized LOC100159241	74.2492	111.93	47.3962	346.191	372.646	282.539	0.00104159	2.97782	4.14561e-08	7.87797	2.98231
MSTRG.17417	LOC100573926	uncharacterized LOC100573926	128.02	226.655	150.814	701.81	773.851	707.961	5.81202e-08	2.99308	2.31324e-12	7.96174	7.23567
MSTRG.5713	#N/A	#N/A	158.253	78.3458	78.1411	414.357	487.984	466.957	0.000511038	3.00377	2.03398e-08	8.02096	3.29155
MSTRG.10988	LOC103311888	#N/A	65.7279	60.3496	90.7009	244.221	331.815	377.262	0.00024613	3.03364	9.79622e-09	8.18873	3.60884
MSTRG.6378	LOC100163006	doublesex- and mab-3-related transcription factor A2-like	75.21	99.5343	64.366	361.714	439.978	272.81	4.36637e-06	3.06554	1.73786e-10	8.3718	5.35988
MSTRG.5532	LOC100160397	homeobox protein prospero-like	480	777.826	405.588	2496.04	2751.86	2221.98	1.23477e-12	3.06614	4.91451e-17	8.37529	11.9084
MSTRG.19778	LOC100167590	uncharacterized LOC100167590	62.9423	93.8747	35.992	258.187	276.498	334.569	0.0056737	3.10602	2.25819e-07	8.61006	2.24613
MSTRG.10276	LOC100165618	kinesin-like protein CG14535-like	50.6451	62.5436	47.4184	244.879	221.215	265.473	1.07211e-05	3.1228	4.2671e-10	8.71076	4.96976
MSTRG.16266	LOC100166065	actin-42A-like	195.937	129.001	170.331	556.062	772.942	1031.11	3.50519e-06	3.20567	1.3951e-10	9.22576	5.45529
MSTRG.20755	LOC100573371	uncharacterized LOC100573371	33.7038	47.7556	23.4155	167.641	172.237	168.164	0.000345886	3.24924	1.37666e-08	9.50861	3.46107
MSTRG.12655	LOC100571267	transcriptional repressor scratch 1-like	25.1832	48.9347	30.2692	171.205	193.111	146.95	0.000319036	3.25422	1.26979e-08	9.54153	3.49616
MSTRG.18148	LOC100165386	uncharacterized LOC100165386	30.818	59.2254	71.4003	181.138	331.46	289.697	0.00481757	3.27115	1.91744e-07	9.65418	2.31717
MSTRG.2094	LOC100169080	uncharacterized LOC100169080	50.6258	118.849	73.6333	334.571	405.031	510.77	0.000203248	3.37895	8.08947e-09	10.4032	3.69197
MSTRG.2532	LOC100169173	e3 ubiquitin-protein ligase RNF8-like	98.7431	179.584	146.393	811.639	744.081	742.884	5.7942e-11	3.4592	2.30615e-15	10.9982	10.237
MSTRG.13998	LOC100159745	uncharacterized LOC100159745	5883.96	13256.5	7295.28	41778.6	39185.1	62410.8	1.25678e-08	3.49636	5.00211e-13	11.2852	7.90074
MSTRG.2450	LOC100569279	uncharacterized LOC100569279	93.0824	105.367	132.776	606.405	649.741	593.93	1.01567e-12	3.51998	4.04245e-17	11.4715	11.9932
MSTRG.21564	LOC100168554	uncharacterized LOC100168554	42.175	57.9461	58.558	271.299	311.673	301.429	1.20414e-08	3.52358	4.79259e-13	11.5002	7.91932
MSTRG.13072	LOC100161988	uncharacterized LOC100161988	728.144	548.629	380.699	3080.69	3124.43	3150.59	3.15672e-18	3.549	1.25641e-22	11.7046	17.5008
MSTRG.12693	LOC100574240	uncharacterized LOC100574240	114.837	58.089	72.4153	384.845	460.303	536.503	1.2121e-06	3.55277	4.82429e-11	11.7352	5.91646
MSTRG.2421	#N/A	#N/A	178.962	274.012	130.458	1156.83	1532.25	688.291	9.45281e-08	3.56624	3.76231e-12	11.8453	7.02444
MSTRG.20503	LOC100164834	uncharacterized LOC100164834	31.8072	24.2605	15.5034	125.17	167.475	118.307	0.000264197	3.57228	1.05153e-08	11.8949	3.57807
MSTRG.9148	LOC100572631	uncharacterized LOC100572631	153.473	196.477	190.738	881.913	977.929	1235.82	2.95351e-14	3.58802	1.17553e-18	12.0255	13.5297
MSTRG.15752	LOC100164995	uncharacterized LOC100164995	28.9414	34.4313	45.1142	162.676	222.013	247.751	1.02543e-05	3.61011	4.0813e-10	12.211	4.9891
MSTRG.14017	LOC100167680	uncharacterized LOC100167680	127.993	286.408	182.761	1249.49	1154.06	1166.08	2.81015e-11	3.67532	1.11847e-15	12.7756	10.5513
MSTRG.15835	LOC100163119	uncharacterized LOC100163119	5833.93	13263.5	8296.22	60883.3	55332.7	53919.7	1.56089e-16	3.74844	6.2125e-21	13.4398	15.8066
MSTRG.16730	LOC100159450	sterile alpha and TIR motif-containing protein 1-like	17.6289	24.2838	21.2387	128.639	109.364	147.525	3.84315e-05	3.75364	1.52961e-09	13.4883	4.41531
MSTRG.20363	LOC100575193	uncharacterized LOC100575193	83.6666	117.639	115.52	621.298	608.859	736.612	4.58187e-13	3.75477	1.82363e-17	13.4989	12.339
MSTRG.2905	LOC100161496	uncharacterized LOC100161496	114.783	121.123	161.196	813.022	944.388	847.39	6.30462e-18	3.85059	2.5093e-22	14.4259	17.2003
MSTRG.13236	Tcf21	#N/A	15.7614	27.5684	15.4571	103.682	108.198	163.333	0.000789665	3.86989	3.14295e-08	14.6202	3.10256
MSTRG.6524	LOC100166469	LIM homeobox transcription factor 1-beta-like	13.8661	11.8786	32.5053	102.685	150.887	127.244	0.00527508	3.89034	2.09953e-07	14.8289	2.27777
MSTRG.23174	LOC103311780	#N/A	11.0248	24.3017	18.9883	113.073	168.4	95.9833	0.00013896	3.95393	5.53075e-09	15.4971	3.85711
MSTRG.3394	#N/A	#N/A	16.6806	10.7793	30.3815	125.428	194.833	94.7429	0.00252482	4.0419	1.0049e-07	16.4715	2.59777
MSTRG.7287	LOC100163285	uncharacterized LOC100163285	169.507	400.083	130.476	1846.04	2173.08	1434.63	4.90678e-09	4.21122	1.95295e-13	18.5227	8.3092
MSTRG.4874	LOC100167260	atrial natriuretic peptide receptor 1-like	75.1569	55.8573	100.89	598.19	646.311	611.658	8.27388e-15	4.26632	3.29309e-19	19.2437	14.0823
MSTRG.7323	LOC100166709	lachesin-like	11.1333	10.54	8.36308	55.9581	82.4315	106.458	0.000551464	4.34002	2.19488e-08	20.2524	3.25848
MSTRG.10500	#N/A	#N/A	36.5093	40.0072	7.51094	224.091	328.722	165.391	0.00162077	4.41774	6.45082e-08	21.3733	2.79028
MSTRG.223	LOC100158731	uncharacterized LOC100158731	14.7891	40.082	21.2484	201.11	271.604	233.63	2.44894e-08	4.63529	9.74703e-13	24.852	7.61102
MSTRG.9932	LOC100169134	uncharacterized LOC100169134	12.9307	11.8602	18.8409	125.953	140.01	152.838	1.30035e-08	4.66097	5.17553e-13	25.2984	7.88594
MSTRG.7555	LOC115033734	#N/A	125.161	112.125	158.897	487.267	1945.1	1440.3	1.90096e-07	4.66954	7.566e-12	25.449	6.72103
MSTRG.12833	#N/A	#N/A	12.9301	5.08929	7.51561	84.597	115.264	65.5091	3.55631e-05	4.74704	1.41545e-09	26.8536	4.449
MSTRG.11172	LOC100167146	uncharacterized LOC100167146	15.7511	10.7567	9.80125	102.713	144.228	128.647	5.93635e-09	4.89586	2.36273e-13	29.7716	8.22648
MSTRG.19680	#N/A	#N/A	16.6731	33.3359	39.464	311.489	419.849	300.37	1.22266e-12	5.01799	4.86629e-17	32.4016	11.9127
MSTRG.10499	#N/A	#N/A	74.2132	90.7419	200.994	1376.33	1797.2	1175.12	9.70882e-14	5.05818	3.86421e-18	33.3169	13.0128
MSTRG.741	LOC100575358	CD166 antigen-like	35.539	127.877	148.679	1118.9	1344.26	1196.87	3.18312e-09	5.06008	1.26691e-13	33.3607	8.49715
MSTRG.19681	LOC100573073	uncharacterized LOC100573073	22.3292	47.9565	54.2053	488.052	614.849	467.736	1.51098e-15	5.20567	6.01384e-20	36.903	14.8207
MSTRG.12063	LOC100575970	homeobox protein Nkx-2.6-like	17.6157	88.3759	51.9115	701.514	626.369	665.768	3.30951e-08	5.24962	1.31722e-12	38.0445	7.48024
MSTRG.13863	#N/A	#N/A	4.50677	2.69146	6.1584	51.4135	73.1855	39.0511	0.000486732	5.32083	1.93724e-08	39.9697	3.31271
MSTRG.17146	#N/A	#N/A	0	6.23667	6.43603	51.0996	62.5706	64.9941	0.00592728	5.38672	2.35912e-07	41.8374	2.22714
MSTRG.16232	LOC100166986	nucleoredoxin-like	46.8525	28.834	18.9517	501.998	450.176	396.606	8.9953e-17	5.48221	3.58022e-21	44.7004	16.046
MSTRG.10636	LOC100169375	uncharacterized LOC100169375	12.9047	34.4413	26.9078	387.427	405.722	395.555	8.18357e-18	5.70082	3.25714e-22	52.0137	17.0871
MSTRG.10498	LOC115033825	#N/A	12.9062	13.0406	28.0373	333.18	353.379	225.458	1.97955e-14	5.79908	7.8788e-19	55.6798	13.7034
MSTRG.17452	LOC100575431	pancreas transcription factor 1 subunit alpha-like	4.47116	0.44909	2.89008	47.3637	30.9071	57.274	0.00719804	6.04722	2.86489e-07	66.1293	2.14279
MSTRG.13617	LOC100575915	homeobox protein slou-like	2.56725	9.62004	9.78193	121.62	149.783	144.283	5.17148e-11	6.16262	2.0583e-15	71.6363	10.2864
MSTRG.18294	LOC100570399	muscle-specific homeobox protein tinman-like	0	10.6802	9.66863	133.161	139.865	143.342	4.45242e-07	6.26597	1.77211e-11	76.9563	6.3514
MSTRG.25408	#N/A	#N/A	11.0198	29.9602	26.9321	468.053	583.732	399.497	1.926e-21	6.29874	7.66565e-26	78.7246	20.7153
MSTRG.952	LOC100158930	class E basic helix-loop-helix protein 22-like	36.4774	42.3447	20.0792	679.632	666.362	796.271	3.2917e-28	6.38087	1.31013e-32	83.3359	27.4826
MSTRG.4443	#N/A	#N/A	2.57018	8.47896	16.5431	240.875	240.431	181.86	8.23833e-12	6.61461	3.27894e-16	97.9933	11.0842
MSTRG.9160	#N/A	#N/A	0	1.5343	3.87674	38.1311	77.2756	32.2776	0.00158423	6.83843	6.3054e-08	114.439	2.80018
MSTRG.18505	#N/A	#N/A	0	0.444915	6.31935	54.0652	81.9305	39.8874	0.00481861	6.86738	1.91786e-07	116.759	2.31708
MSTRG.13214	LOC100169047	uncharacterized LOC100169047	208.22	477.752	535.357	12396.4	15868.3	13620.8	8.78448e-42	7.28988	3.49631e-46	156.485	41.0563
MSTRG.10637	#N/A	#N/A	7.25382	27.707	41.7346	876.25	1035.92	867.914	1.72906e-19	7.41539	6.88182e-24	170.709	18.7622
MSTRG.15733	LOC100164166	uncharacterized LOC100164166	26.1273	35.5308	221.421	2590.16	3797.91	4568.44	1.48059e-06	7.53366	5.89291e-11	185.292	5.82956
MSTRG.4401	#N/A	#N/A	0	6.11009	0.367938	165.1	83.6638	50.2697	0.000170861	7.96061	6.80044e-09	249.105	3.76736
MSTRG.794	LOC100164426	LIM/homeobox protein Lhx3-like	0	0.576018	6.38991	224.646	281.419	242.822	9.3789e-22	9.60543	3.73289e-26	778.974	21.0278
MSTRG.13647	LOC107882175	#N/A	0	0.210023	0.183712	29.6654	26.093	18.0435	0.0027889	10.9392	1.11001e-07	1963.49	2.55457
MSTRG.9173	#N/A	#N/A	0	0.522822	2.89245	159.923	248.138	267.43	2.43825e-24	11.0211	9.70448e-29	2078.18	23.6129
MSTRG.4385	#N/A	#N/A	0	0.290141	0.29978	40.9161	24.0731	19.7119	0.00117499	11.2145	4.67658e-08	2376.35	2.92997
MSTRG.7324	#N/A	#N/A	0	0.319719	0.334379	32.3978	44.5313	22.106	3.84752e-05	11.5414	1.53135e-09	2980.68	4.41482
MSTRG.18757	LOC100167026	uncharacterized LOC100167026	0	0.285848	0.276875	28.9952	42.4028	30.6767	6.57772e-06	11.6246	2.618e-10	3157.56	5.18192
MSTRG.4433	#N/A	#N/A	0	0.31556	0.322518	56.3534	25.2804	23.1663	0.000163164	11.6734	6.49409e-09	3266.3	3.78738
MSTRG.8995	LOC100568529	paired box protein Pax-8-like	0	0.343422	0.367109	46.7264	26.3698	32.3779	1.18868e-05	11.7102	4.73106e-10	3350.57	4.92494
MSTRG.13876	LOC100575258	protein msta, isoform A-like	0	0.319623	0.323743	11.5829	53.2221	46.5506	0.00124524	11.8175	4.95617e-08	3609.36	2.90475
MSTRG.20385	#N/A	#N/A	0	0.316781	0.316038	19.2878	55.4042	40.933	4.11672e-05	11.8765	1.6385e-09	3760	4.38545
MSTRG.9774	LOC100162218	protein yellow-like	0	0.263655	0.218081	39.8195	63.0491	31.3716	1.29466e-07	12.1751	5.15289e-12	4624.53	6.88784
MSTRG.12531	LOC100572677	vesicular glutamate transporter 1-like	0	0.498309	0.603624	39.7573	33.0416	61.4689	3.6476e-07	12.2343	1.45178e-11	4818.32	6.43799
MSTRG.11734	LOC100166263	uncharacterized LOC100166263	0	0.316165	0.295899	47.7638	40.5812	56.2224	5.4088e-09	12.3724	2.15276e-13	5302.27	8.2669
MSTRG.20518	#N/A	#N/A	0	0.452051	0.515274	18.5179	68.7428	65.2683	9.91623e-06	12.4663	3.94676e-10	5658.83	5.00365
MSTRG.2890	LOC100568721	uncharacterized LOC100568721	0	0.424785	0.465282	42.8697	56.9268	61.3491	3.69373e-10	12.5926	1.47014e-14	6176.69	9.43253
MSTRG.23318	#N/A	#N/A	0	0.387971	0.396495	48.2375	67.8158	61.7595	1.82552e-11	12.7817	7.26576e-16	7041.74	10.7386
MSTRG.2364	LOC100165020	uncharacterized LOC100165020	0	0.427022	0.443177	54.039	56.1833	114.108	1.48231e-10	13.3054	5.89974e-15	10123.5	9.82906

## Sheet: DEGs_3vs4_sequential
gene_ID	LOC#	gene name	F1_3	F2_3	F3_3	F1_4	F2_4	F3_4	padj	log2FoldChange	pvalue	foldChange	log10padj
MSTRG.15662	#N/A	#N/A	625.93	584.89	570.262	0	0	0	3.60329e-73	-17.5578	1.43414e-77	5.1828e-06	72.4433
MSTRG.7837	Cp21	cuticular protein 21	124.494	108.863	187.261	0	0	0.342211	9.00206e-24	-14.5669	3.58291e-28	4.12022e-05	23.0457
MSTRG.15483	LOC100575811	cuticle protein-like	37.7142	50.2348	39.6361	0	0	0	6.63634e-10	-12.0692	2.64133e-14	0.000232702	9.17807
MSTRG.5261	LOC107885086	#N/A	117.582	188.863	54.9273	0	0	1.21432	1.73674e-13	-11.5099	6.91241e-18	0.000342901	12.7603
MSTRG.21559	Cp57	cuticular protein 57	17.1108	29.7371	18.4387	0	0	0	0.00447059	-10.65	1.77934e-07	0.000622327	2.34964
MSTRG.7846	#N/A	#N/A	61.2227	95.1224	36.9816	0	1.32052	0.435471	6.39416e-10	-10.2102	2.54494e-14	0.000844164	9.19422
MSTRG.11840	#N/A	#N/A	97.7782	76.5341	156.859	3.39755	0	0	1.1247e-13	-9.5002	4.47641e-18	0.00138088	12.949
MSTRG.25113	LOC100569063	uncharacterized LOC100569063	46.2549	57.6053	24.7057	2.1082	0	0	1.21666e-05	-8.23445	4.84242e-10	0.00332034	4.91483
MSTRG.7410	LOC100164245	gastric triacylglycerol lipase-like	46.6892	32.2	33.8654	1.94958	0	0	8.77683e-06	-7.96251	3.49327e-10	0.00400908	5.05666
MSTRG.7818	#N/A	#N/A	37.9599	46.1822	72.5991	0	0	3.00576	1.78404e-06	-7.93374	7.10067e-11	0.00408985	5.74859
MSTRG.19449	LOC100165262	uncharacterized LOC100165262	22.0814	36.4089	49.6025	1.94028	0	0	0.000357185	-7.89692	1.42163e-08	0.00419556	3.44711
MSTRG.7843	#N/A	#N/A	110.589	96.8941	126.074	5.59585	0.446353	3.8409	5.4756e-15	-7.36979	2.17934e-19	0.00604605	14.2616
MSTRG.1249	Cp43	cuticular protein 43	731.006	1258.08	1330.87	52.5673	30.8564	15.2651	2.37514e-21	-7.22743	9.45331e-26	0.0066731	20.6243
MSTRG.7829	ACYPI009260	#N/A	25.5831	69.4086	43.8558	4.13149	0	0	0.00346338	-7.11793	1.37846e-07	0.00719929	2.4605
MSTRG.20100	LOC100162231	protein takeout-like	830.201	1741.49	779.612	32.098	26.2719	51.4027	9.40171e-24	-6.98763	3.74197e-28	0.00787977	23.0268
MSTRG.1243	Cp45	cuticular protein 45	458.104	674.67	772.129	35.1032	16.3365	14.3753	2.57656e-22	-6.90177	1.0255e-26	0.00836297	21.589
MSTRG.7840	#N/A	#N/A	233.189	318.206	416.867	25.2186	7.1832	3.81628	1.08519e-09	-6.77683	4.31917e-14	0.00911949	8.96449
MSTRG.7830	Cp25	cuticular protein 25	51.9399	145.016	136.551	7.83964	6.44061	0	7.61667e-05	-6.48764	3.03151e-09	0.0111436	4.11824
MSTRG.21885	LOC100575432	uncharacterized LOC100575432	250.41	569.138	285.618	10.872	8.71164	27.5852	1.37608e-11	-6.43619	5.47695e-16	0.0115482	10.8614
MSTRG.5942	LOC103309259	#N/A	41.4503	62.0663	41.6607	3.35665	2.70568	0	5.36298e-06	-6.4331	2.13452e-10	0.0115729	5.27059
MSTRG.24247	#N/A	#N/A	29.4433	37.3298	24.4989	1.42661	2.24623	1.38231	0.00126027	-6.2456	5.016e-08	0.0131791	2.89954
MSTRG.24873	#N/A	#N/A	34.0713	42.7308	31.8463	1.35271	2.16966	2.22016	5.70106e-05	-6.18567	2.26908e-09	0.0137381	4.24404
MSTRG.6761	LOC100160356	putative fatty acyl-CoA reductase CG5065-like	1218.32	2859.68	857.71	82.1511	46.1403	109.622	1.35124e-12	-6.15733	5.37806e-17	0.0140107	11.8693
MSTRG.7823	LOC100165741	cuticular protein	862.094	1016.29	1195.51	40.4373	54.5307	70.8067	9.34911e-35	-5.9571	3.72104e-39	0.0160966	34.0292
MSTRG.6738	LOC100166574	uncharacterized LOC100166574	1399.96	4079.71	1538.2	113.262	92.0015	175.792	1.95811e-14	-5.9184	7.79347e-19	0.0165343	13.7082
MSTRG.13439	LOC100159750	uncharacterized protein LOC100159750	86.1426	203.322	173.6	11.6555	8.74091	5.58601	7.85747e-10	-5.90473	3.12735e-14	0.0166916	9.10472
MSTRG.6521	LOC100575796	uncharacterized LOC100575796	254.779	540.885	186.651	23.6983	7.18	23.1693	7.97822e-08	-5.89888	3.17541e-12	0.0167595	7.09809
MSTRG.7839	Cp5	cuticular protein 5	1186.2	1598.54	1498.86	120.821	61.4043	70.8046	4.64865e-33	-5.76836	1.85021e-37	0.0183464	32.3327
MSTRG.6516	LOC100573307	possible pseudogene or miscRNA, No KEGG entry	236.595	569.942	180.57	28.9981	17.0653	11.723	3.31082e-08	-5.76702	1.31774e-12	0.0183634	7.48006
MSTRG.16747	Cprr1-11	RR1 cuticle protein 11	372.508	572.943	482.248	22.2635	16.3598	49.6537	2.14396e-13	-5.67868	8.53319e-18	0.019523	12.6688
MSTRG.7798	Cp16	cuticular protein 16	4682.65	6673.14	5070.57	394.883	289.348	334.629	5.22025e-85	-5.65652	2.07771e-89	0.0198252	84.2823
MSTRG.6359	LOC100163566	uncharacterized LOC100163566	6649.55	11207.4	7575.9	570.253	451.526	616.115	1.32667e-60	-5.57344	5.28028e-65	0.0210005	59.8772
MSTRG.20107	LOC100159685	takeout-like	976.144	1712.42	649.078	78.3339	64.4537	76.9756	4.00262e-19	-5.51996	1.59308e-23	0.0217934	18.3977
MSTRG.13285	LOC100160991	pancreatic lipase-related protein 1-like	38.1041	119.954	74.8886	7.8976	2.72004	4.74067	0.000242241	-5.45428	9.64143e-09	0.0228086	3.61575
MSTRG.21891	LOC100160576	uncharacterized protein LOC100160576	90.1373	163.052	59.4006	7.86964	6.46723	8.23778	6.51333e-07	-5.41175	2.59237e-11	0.023491	6.1862
MSTRG.19679	ACYPI56506	#N/A	94.9914	74.3828	118.656	0.346187	12.5504	8.23083	0.00616939	-5.36484	2.45548e-07	0.0242673	2.20976
MSTRG.12896	LOC100164752	CG14095-like	388.236	832.95	546.316	56.2843	17.8209	54.9066	2.71589e-09	-5.3372	1.08095e-13	0.0247367	8.56609
MSTRG.20371	LOC100164783	uncharacterized LOC100164783	3604.8	5834.21	2996.59	380.433	252.6	271.086	7.51126e-36	-5.31706	2.98956e-40	0.0250844	35.1243
MSTRG.7845	LOC100160252	uncharacterized LOC100160252	404.269	567.65	552.048	49.4656	23.9324	39.0355	1.21191e-19	-5.31182	4.82351e-24	0.0251759	18.9165
MSTRG.7820	#N/A	#N/A	93.8554	168.645	91.3845	10.8524	5.68046	9.97912	4.11129e-09	-5.24991	1.63634e-13	0.0262797	8.38602
MSTRG.20121	LOC100570018	circadian clock-controlled protein-like	1471.69	2989.58	968.752	104.162	171.524	129.918	1.20244e-13	-5.2451	4.78582e-18	0.0263675	12.9199
MSTRG.7828	#N/A	#N/A	65.5687	137.712	170.171	10.851	9.4709	8.21821	3.10994e-07	-5.24076	1.23779e-11	0.0264468	6.50725
MSTRG.7833	Cp17	cuticular protein 17	758.093	975.062	906.026	76.7942	71.3124	56.6819	4.29772e-35	-5.19623	1.71054e-39	0.0272758	34.3668
MSTRG.14759	LOC100570553	aminopeptidase N-like	78.9075	58.1194	64.881	8.61243	1.17941	7.36292	3.41545e-05	-5.15707	1.35938e-09	0.0280264	4.46655
MSTRG.7799	Cp41	cuticular protein 41	669.038	774.073	635.643	81.3568	29.3079	55.8049	5.50113e-16	-5.14072	2.1895e-20	0.0283459	15.2595
MSTRG.11099	LOC100574272	uncharacterized LOC100574272	165.504	179.741	109.837	18.404	9.46362	9.09162	2.78583e-11	-5.13226	1.10879e-15	0.0285125	10.555
MSTRG.10700	LOC100572539	uncharacterized LOC100572539	113.702	252.566	545.023	22.2022	42.2743	10.8478	0.00988175	-5.10848	3.93303e-07	0.0289864	2.00517
MSTRG.3471	LOC100166298	uncharacterized LOC100166298	43.3192	63.2414	65.2149	7.30869	0	7.45685	0.00906144	-5.09937	3.60654e-07	0.02917	2.0428
MSTRG.24107	LOC100165995	MFS-type transporter C6orf192 homolog	105.14	67.0886	228.682	15.3966	13.2841	4.70893	0.00143719	-5.08332	5.72016e-08	0.0294963	2.84249
MSTRG.11906	LOC100166678	uncharacterized LOC100166678	4103.09	6824.36	4757.82	530.801	388.054	364.645	7.57675e-46	-5.0782	3.01562e-50	0.0296012	45.1205
MSTRG.7825	Cp1	cuticular protein 1	987.832	1474.39	1646.88	105.675	142.464	93.748	1.39752e-26	-5.05672	5.56227e-31	0.0300452	25.8546
MSTRG.7826	Cp30	cuticular protein 30	580.175	587.501	857.742	47.2485	55.2876	75.2173	2.52157e-19	-4.95252	1.00361e-23	0.0322956	18.5983
MSTRG.8446	LOC100158673	glucose dehydrogenase [acceptor]-like	34.6368	42.9593	58.5666	4.86792	1.96953	4.74868	0.00123511	-4.93786	4.91586e-08	0.0326253	2.90829
MSTRG.21535	LOC100161211	uncharacterized LOC100161211	6473.93	8661.41	5393.48	807.914	403.3	611.701	1.14272e-31	-4.90646	4.54814e-36	0.0333434	30.9421
MSTRG.21878	LOC100568915	uncharacterized LOC100568915	244.806	616.806	350.291	34.3362	41.516	31.9949	4.13748e-11	-4.89685	1.64676e-15	0.0335662	10.3833
MSTRG.21574	LOC100166950	uncharacterized LOC100166950	12888.5	19837.7	13239.9	1766.8	1097.26	1247.95	3.05155e-43	-4.89052	1.21455e-47	0.0337138	42.5155
MSTRG.20106	LOC100571146	uncharacterized LOC100571146	121.373	305.305	76.9492	11.6025	10.9812	24.9494	0.00300407	-4.82948	1.19565e-07	0.0351707	2.52229
MSTRG.7819	Cp38	cuticular protein 38	746.84	1203.93	884.345	104.119	82.7914	76.9734	4.43966e-26	-4.81143	1.76703e-30	0.0356134	25.3527
MSTRG.3307	LOC100574328	uncharacterized LOC100574328	56.3127	61.3187	82.0332	4.09723	10.2846	5.60368	2.08588e-05	-4.79956	8.30199e-10	0.0359078	4.68071
MSTRG.18399	LOC100161568	uncharacterized LOC100161568	218.331	317.908	210.084	18.4375	36.9511	16.1367	2.57315e-10	-4.79351	1.02414e-14	0.0360586	9.58953
MSTRG.7111	#N/A	#N/A	146.423	170.227	174.765	10.8778	17.8704	18.7897	1.98186e-13	-4.77123	7.88801e-18	0.03662	12.7029
MSTRG.7847	Cp10	cuticular protein 10	4352.44	6533.63	4323.23	708.437	255.666	495.217	1.06273e-16	-4.74578	4.22978e-21	0.0372716	15.9736
MSTRG.7800	LOC100302322	cuticular protein	379.452	619.643	736.751	80.592	52.2118	38.1663	3.92918e-11	-4.71912	1.56385e-15	0.0379668	10.4057
MSTRG.7817	Cp12	cuticular protein 12	2462.32	2883.58	2795.45	296.17	243.42	256.969	4.5266e-71	-4.71342	1.80163e-75	0.0381169	70.3442
MSTRG.20032	LOC100159024	uncharacterized LOC100159024	552.817	458.04	888.602	92.0529	51.509	44.3643	3.90451e-10	-4.71201	1.55403e-14	0.0381543	9.40843
MSTRG.7813	Cp33	cuticular protein 33	288.868	435.604	285.036	25.9619	36.9025	37.2734	1.17323e-15	-4.69592	4.66955e-20	0.0385821	14.9306
MSTRG.16986	LOC100166724	serine proteinase stubble-like	308.613	739.727	253.882	19.9434	54.498	54.0382	6.86144e-05	-4.67901	2.73092e-09	0.0390372	4.16358
MSTRG.5897	LOC100164574	uncharacterized LOC100164574	209.48	759.256	438.526	35.8133	26.211	77.8602	0.000594688	-4.67705	2.36692e-08	0.0390901	3.22571
MSTRG.20566	LOC100160919	uncharacterized protein LOC100160919	105.131	83.9872	88.014	13.885	3.42113	10.8692	1.03509e-05	-4.67632	4.11977e-10	0.03911	4.98502
MSTRG.7827	Cp28	cuticular protein 28	2025.43	2388.89	3389.93	207.391	291.633	282.567	3.31981e-29	-4.67445	1.32132e-33	0.0391607	28.4789
MSTRG.21771	LOC100163970	elongation of very long chain fatty acids protein AAEL008004-like	5869.66	9925.7	6122.56	820.787	803.439	548.163	3.0262e-35	-4.67392	1.20446e-39	0.0391752	34.5191
MSTRG.8684	LOC100168857	glucose dehydrogenase [acceptor]-like	186.726	177.691	127.432	18.417	26.2792	6.45699	3.22009e-06	-4.6403	1.28163e-10	0.0400988	5.49213
MSTRG.7797	Cp14	cuticular protein 14	139.313	158.289	144.792	18.4052	9.46172	17.899	3.8842e-12	-4.63607	1.54595e-16	0.0402166	11.4107
MSTRG.11164	LOC100167851	uncharacterized LOC100167851	829.005	838.911	654.659	114.009	52.9376	76.0797	3.91937e-17	-4.57781	1.55995e-21	0.0418737	16.4068
MSTRG.2527	LOC100161673	putative defense protein Hdd11-like	510.064	630.111	326.751	49.462	50.6555	52.2637	3.72681e-16	-4.57434	1.48331e-20	0.0419745	15.4287
MSTRG.24995	#N/A	#N/A	64.1506	38.7301	47.0606	8.18603	2.89809	4.84209	0.00226697	-4.54066	9.02278e-08	0.0429662	2.64455
MSTRG.18272	LOC100159543	possible pseudogene or miscRNA, No KEGG entry	1513.67	1412.12	2312.76	212.651	214.338	143.137	2.34754e-21	-4.50889	9.34344e-26	0.0439226	20.6294
MSTRG.9853	LOC100160152	uncharacterized protein LOC100160152	7007.83	7213.86	6915.06	821.545	638.952	825.252	7.45253e-91	-4.50421	2.96618e-95	0.0440653	90.1277
MSTRG.7177	LOC100571399	uncharacterized LOC100571399	87.3005	163.697	197.912	7.85074	23.9746	17.0244	0.000107734	-4.50392	4.28793e-09	0.0440742	3.96765
MSTRG.17515	Cprr1-7	RR1 cuticle protein 7	6545.89	10373.3	6714.3	1025.02	690.989	855.258	5.67038e-40	-4.4827	2.25687e-44	0.0447273	39.2464
MSTRG.19207	LOC100159939	uncharacterized LOC100159939	782.181	652.443	969.088	109.538	84.4091	71.7192	3.21199e-19	-4.46979	1.2784e-23	0.0451293	18.4932
MSTRG.6831	LOC100168043	uncharacterized LOC100168043	553.882	1057.78	570.677	72.2288	68.2435	99.906	1.21809e-13	-4.45759	4.84812e-18	0.0455127	12.9143
MSTRG.883	LOC100159662	uncharacterized LOC100159662	1598.2	3186.53	1631.38	237.701	266.362	201.37	3.60191e-20	-4.45357	1.4336e-24	0.0456396	19.4435
MSTRG.5271	LOC100167736	uncharacterized LOC100167736	25204.1	35768	29660.3	4027.84	2827.14	3224.64	1.52244e-57	-4.44258	6.05946e-62	0.0459885	56.8175
MSTRG.19612	#N/A	#N/A	155.352	178.741	131.753	29.0102	9.46211	14.371	2.82075e-07	-4.43857	1.12269e-11	0.0461166	6.54963
MSTRG.5249	LOC100575006	transcriptional activator GLI3-like	2630.43	6641.88	7985.14	861.883	625.199	475.804	1.05058e-09	-4.40932	4.18141e-14	0.0470613	8.97857
MSTRG.7838	Cp22	cuticular protein 22	77.9826	85.0659	112.446	17.6704	7.96895	7.34806	5.09304e-05	-4.33713	2.02708e-09	0.0494759	4.29302
MSTRG.12917	LOC100159715	uncharacterized protein LOC100159715	454.513	1089.86	438.635	60.8351	49.1199	121.987	3.02614e-05	-4.32557	1.20444e-09	0.0498739	4.51911
MSTRG.4976	Cprr1-1	RR1 cuticle protein 1	16338.2	21925.8	17098.4	2768.98	1624.38	2139.21	1.00483e-40	-4.31823	3.99931e-45	0.0501283	39.9979
MSTRG.18414	LOC100165676	laccase-1-like	211.305	324.059	90.4058	18.4094	21.651	35.5294	0.000919141	-4.29307	3.65827e-08	0.0510102	3.03662
MSTRG.2167	LOC100164067	uncharacterized LOC100164067	172.671	143.558	245.615	33.6131	26.2843	9.10034	0.000163412	-4.28197	6.50398e-09	0.0514041	3.78671
MSTRG.11105	LOC100165066	actin-87E-like	3045.66	3133.13	1900.89	375.163	233.522	361.993	6.20564e-26	-4.2739	2.46991e-30	0.0516925	25.2072
MSTRG.6308	#N/A	#N/A	77.215	53.7717	70.4992	9.11641	7.62763	8.43798	1.3861e-05	-4.25926	5.51683e-10	0.0522196	4.8582
MSTRG.1820	LOC100573472	zinc transporter ZIP3-like	113.037	77.6359	136.103	15.6807	10.414	13.6078	1.66526e-06	-4.25457	6.62789e-11	0.05239	5.77852
MSTRG.24966	#N/A	#N/A	61.0055	70.783	59.9308	11.2617	4.39961	9.26182	0.000116248	-4.21999	4.62677e-09	0.0536608	3.93462
MSTRG.6834	LOC100161201	uncharacterized protein LOC100161201	387.357	834.181	541.247	41.1335	69.771	107.859	1.02397e-06	-4.20319	4.07548e-11	0.0542892	5.98971
MSTRG.19085	LOC100169332	glutamate decarboxylase-like protein 1-like	152.099	271.18	109.897	22.188	13.2646	31.1234	8.87234e-05	-4.19448	3.53128e-09	0.054618	4.05196
MSTRG.10126	LOC100164120	uncharacterized LOC100164120	354.226	760.76	547.006	53.2525	57.5324	98.154	1.48646e-08	-4.18745	5.91626e-13	0.0548847	7.82785
MSTRG.18126	LOC100169242	uncharacterized LOC100169242	70.8198	72.3245	185.103	10.9533	13.3942	17.9849	0.00897097	-4.17117	3.57053e-07	0.0555078	2.04716
MSTRG.10290	LOC100161104	bifunctional enzyme CarRP-like	331.343	427.215	333.355	72.2911	17.1128	49.6507	4.62545e-05	-4.15568	1.84097e-09	0.0561067	4.33485
MSTRG.7815	Cp37	cuticular protein 37	124.698	195.93	155.864	13.8631	24.7157	22.304	2.09761e-08	-4.13924	8.3487e-13	0.0567497	7.67828
MSTRG.12898	LOC100166768	uncharacterized LOC100166768	766.259	1661.7	750.044	79.83	114.894	213.748	7.57241e-06	-4.12778	3.01389e-10	0.0572023	5.12077
MSTRG.7643	LOC100167758	uncharacterized LOC100167758	324.809	1101.75	495.372	74.5232	46.864	125.51	0.00169663	-4.12749	6.75276e-08	0.0572138	2.77041
MSTRG.11987	#N/A	#N/A	63.8305	92.2194	56.511	7.9448	5.77626	13.5908	0.000400945	-4.11974	1.5958e-08	0.057522	3.39692
MSTRG.23720	#N/A	#N/A	59.9636	53.7709	74.1552	6.59104	8.23563	11.029	0.000194031	-4.11404	7.72262e-09	0.0577497	3.71213
MSTRG.7655	Cp62	cuticular protein 62	2584.5	3846.3	3379.12	379.673	333.681	572.892	1.81149e-25	-4.10176	7.20992e-30	0.0582437	24.742
MSTRG.1069	LOC100160667	uncharacterized LOC100160667	16125.7	22463.9	15618.3	2929.95	1791.92	2423.35	4.91457e-36	-4.08464	1.95605e-40	0.0589386	35.3085
MSTRG.7835	Cp19	cuticular protein 19	391.632	451.271	598.951	69.1896	62.8911	61.9689	1.33827e-14	-4.05882	5.32646e-19	0.060003	13.8735
MSTRG.18419	LOC103308142	#N/A	89.3144	163.529	146.607	20.7117	19.4038	14.383	1.28402e-06	-4.05256	5.11054e-11	0.0602638	5.89143
MSTRG.6191	Cp47	cuticular protein 47	1349.31	874.189	1713.61	110.967	270.981	152.85	8.57681e-08	-4.0446	3.41365e-12	0.0605974	7.06667
MSTRG.5053	LOC100168453	uncharacterized LOC100168453	570.725	566.758	474.457	83.6132	65.1918	69.9119	1.29847e-19	-4.03329	5.16805e-24	0.0610744	18.8866
MSTRG.9854	#N/A	#N/A	441.861	565.598	534.887	95.0024	51.4185	63.7319	3.75014e-13	-4.02806	1.49259e-17	0.061296	12.426
MSTRG.16156	LOC100168286	uncharacterized LOC100168286	2804.26	2994.77	2566.16	498.395	196.744	446.78	2.48082e-14	-4.01859	9.87392e-19	0.0617	13.6054
MSTRG.17514	Cprr1-8	RR1 cuticle protein 8	28105.9	34160.1	26941	5402.81	2772.83	4148.55	4.72803e-28	-3.99018	1.8818e-32	0.0629268	27.3253
MSTRG.20022	LOC100160512	protein spinster homolog 1-like	389.602	890.175	426.716	63.8759	87.3674	84.0267	4.34555e-08	-3.9894	1.72957e-12	0.0629609	7.36195
MSTRG.1022	LOC100165396	uncharacterized LOC100165396	2378.62	2590.63	1776.83	482.972	210.512	245.492	4.29054e-13	-3.9747	1.70768e-17	0.0636059	12.3675
MSTRG.10571	ORF1	#N/A	208.895	143.444	133.216	32.0673	14.8119	24.0777	2.09686e-06	-3.92646	8.34571e-11	0.0657685	5.67843
MSTRG.24043	#N/A	#N/A	104.98	134.347	75.3327	10.8676	11.7749	22.3497	0.000124403	-3.91441	4.95138e-09	0.0663202	3.90517
MSTRG.8088	ORF5	#N/A	1629.31	3260.38	2480.42	367.53	238.819	451.998	1.81129e-13	-3.90881	7.20911e-18	0.066578	12.742
MSTRG.19331	LOC100163625	possible pseudogene or miscRNA, No KEGG entry	346.128	432.927	612.529	68.4297	63.657	69.9129	3.92001e-11	-3.90506	1.5602e-15	0.0667515	10.4067
MSTRG.17075	LOC100163848	uncharacterized LOC100163848	181.765	201.542	169.856	29.8056	21.6865	29.3715	3.79658e-11	-3.898	1.51108e-15	0.0670787	10.4206
MSTRG.10122	LOC100163867	uncharacterized LOC100163867	5809.33	5775.65	6353.96	694.758	922.798	984.098	7.31253e-50	-3.89482	2.91046e-54	0.0672268	49.1359
MSTRG.2569	LOC100167859	uncharacterized LOC100167859	912.786	998.975	958.312	184.636	131.738	100.782	1.0705e-17	-3.89023	4.26068e-22	0.0674409	16.9704
MSTRG.12897	LOC100162036	CG32214-like	590.588	1379.85	854.684	129.905	91.9478	193.454	4.5025e-07	-3.85817	1.79204e-11	0.0689566	6.34655
MSTRG.12673	LOC100160947	uncharacterized LOC100160947	11521.6	13712.7	8870.98	1974.83	1324.46	1855.07	1.74195e-34	-3.79783	6.93313e-39	0.0719017	33.759
MSTRG.12837	LOC100168942	TLP-PA-domain protein	124.553	108.839	119.57	22.9556	17.0926	13.4985	1.41445e-07	-3.79648	5.62964e-12	0.0719693	6.84941
MSTRG.9695	LOC100160127	uncharacterized LOC100160127	679.72	703.889	531.87	94.2553	75.1264	122.002	7.23882e-15	-3.79043	2.88112e-19	0.0722715	14.1403
MSTRG.10125	LOC100166173	uncharacterized LOC100166173	2350.07	1733.04	1919.64	208.865	407.928	299.325	4.69848e-17	-3.78875	1.87004e-21	0.0723558	16.328
MSTRG.16344	LOC100160509	uncharacterized LOC100160509	232.189	158.501	123.988	34.3576	22.4255	24.0705	4.93474e-06	-3.74767	1.96408e-10	0.0744458	5.30674
MSTRG.7848	Cp11	cuticular protein 11	2348.31	2604.56	1536.92	480.07	262.551	263.148	1.04215e-13	-3.74632	4.14788e-18	0.074515	12.9821
MSTRG.15824	LOC100575539	ovochymase-1-like	307.737	365.788	426.121	40.403	65.3368	66.4551	5.00076e-10	-3.74357	1.99035e-14	0.0746572	9.30096
MSTRG.5235	LOC100166722	uncharacterized LOC100166722	99.5139	100.076	83.1056	24.4857	7.20377	12.6279	0.00369615	-3.73821	1.4711e-07	0.0749353	2.43225
MSTRG.4983	LOC100162364	transmembrane protease serine 9-like	937.229	924.477	773.466	143.586	98.8524	169.625	1.98799e-16	-3.73738	7.91242e-21	0.0749783	15.7016
MSTRG.21540	LOC103308995	#N/A	67.2216	92.4252	95.5047	9.4838	18.1174	12.7046	0.000264753	-3.72515	1.05374e-08	0.0756169	3.57716
MSTRG.20847	LOC100158947	uncharacterized LOC100158947	88.3018	101.284	134.446	10.1115	18.6389	24.0952	0.000374643	-3.69936	1.49112e-08	0.0769806	3.42638
MSTRG.7935	LOC100164389	neurogenic locus notch homolog protein 1-like	260.4	412.75	148.894	46.4356	57.5746	27.5778	0.00110557	-3.67753	4.40026e-08	0.0781544	2.95642
MSTRG.11832	LOC100162741	uncharacterized LOC100162741	278.417	254.491	174.452	30.5135	26.9837	56.7113	7.39498e-06	-3.67231	2.94328e-10	0.0784375	5.13106
MSTRG.17597	LOC100168379	collagen alpha-2(IV) chain-like	1576.88	2645.5	1519.11	492.844	174.631	262.288	1.44755e-06	-3.65462	5.76141e-11	0.0794056	5.83937
MSTRG.13998	LOC100159745	uncharacterized LOC100159745	42226.2	38210.8	65697.3	8497.89	7060.57	8441.8	5.51076e-23	-3.64927	2.19334e-27	0.0797002	22.2588
MSTRG.4430	LOC100570443	zinc finger protein 598-like	65.358	118.022	57.241	10.8725	12.5547	16.1752	0.00473265	-3.63722	1.88364e-07	0.0803689	2.3249
MSTRG.11664	LOC100574123	uncharacterized LOC100574123	447.45	396.22	430.366	76.7825	69.0184	65.503	4.12787e-15	-3.62558	1.64293e-19	0.0810199	14.3843
MSTRG.19499	#N/A	#N/A	959.763	962.534	1471.95	198.287	184.553	181.984	6.50987e-16	-3.62331	2.59099e-20	0.0811474	15.1864
MSTRG.7068	#N/A	#N/A	80.8851	82.8863	102.066	9.42864	17.2531	17.9899	0.000220566	-3.62302	8.77873e-09	0.0811639	3.65646
MSTRG.6647	LOC100160073	MFS-type transporter C6orf192-like	375.69	417.832	563.769	97.2984	78.968	49.6164	7.113e-08	-3.61527	2.83104e-12	0.0816009	7.14795
MSTRG.4107	#N/A	#N/A	43.4319	53.6538	51.523	7.23782	8.13189	10.0883	0.00653846	-3.61417	2.60237e-07	0.0816629	2.18452
MSTRG.9688	LOC100161240	zinc finger protein 512B-like	13139.2	13850.2	10419.1	2960.36	1374.95	1900.95	2.93612e-17	-3.59854	1.16861e-21	0.0825525	16.5322
MSTRG.3168	LOC100160421	uncharacterized LOC100160421	514.211	780.807	969.006	137.568	109.609	136.997	3.12271e-10	-3.57563	1.24287e-14	0.0838741	9.50547
MSTRG.5281	LOC100164538	uncharacterized LOC100164538	24956.2	29767.3	24461.6	5449.09	3400.14	4546.52	6.37608e-37	-3.5693	2.53774e-41	0.0842427	36.1954
MSTRG.8040	LOC100165761	uncharacterized LOC100165761	157.37	127.151	105.976	25.2333	22.4387	19.6666	6.81934e-07	-3.56342	2.71417e-11	0.0845868	6.16626
MSTRG.13118	Cprr1-2	RR1 cuticle protein 2	68.6014	69.886	63.1921	9.37959	11.0536	15.3123	0.000319473	-3.55737	1.27153e-08	0.0849422	3.49557
MSTRG.11436	LOC100168142	lipase member H-B-like	338.254	528.918	580.01	54.0145	73.6008	123.768	2.54694e-05	-3.52367	1.01371e-09	0.0869499	4.59398
MSTRG.11699	LOC100574511	uncharacterized LOC100574511	94.0538	100.344	179.541	19.178	19.3896	27.6155	0.00188276	-3.51808	7.49356e-08	0.0872876	2.72521
MSTRG.12139	LOC100168413	heat shock protein 70 B2-like	288.866	281.719	364.056	71.4979	39.9615	51.3942	4.10742e-08	-3.51461	1.63479e-12	0.087498	7.38643
MSTRG.23656	LOC100164239	myosin-If-like	149.717	150.654	97.2826	10.9307	35.8054	22.3935	0.00793952	-3.51248	3.16001e-07	0.087627	2.10021
MSTRG.24629	LOC103310902	#N/A	108.927	125.78	85.0138	21.7119	21.9329	11.7957	8.52804e-05	-3.50769	3.39424e-09	0.0879187	4.06915
MSTRG.21857	LOC100164372	muscular protein 20	2032.16	2091.64	1956.98	458.664	267.934	338.169	5.97555e-23	-3.50257	2.37833e-27	0.0882309	22.2236
MSTRG.9848	LOC100162193	uncharacterized LOC100162193	6552.35	6394.83	6046.51	1163.21	968.702	1198.54	1.88723e-63	-3.49718	7.51136e-68	0.0885614	62.7242
MSTRG.2553	LOC100162472	putative fatty acyl-CoA reductase CG5065-like	170.052	148.929	232.95	49.5803	22.4163	27.5962	0.000398628	-3.47643	1.58658e-08	0.0898446	3.39943
MSTRG.19437	LOC100572954	uncharacterized LOC100572954	63.1028	67.7794	72.0698	18.4396	11.0296	8.23796	0.00544938	-3.46219	2.16891e-07	0.0907351	2.26365
MSTRG.19916	LOC100164113	cuticle protein-like	625.826	558.42	738.368	174.746	82.8279	88.4603	6.76759e-07	-3.45469	2.69357e-11	0.0912083	6.16957
MSTRG.3413	LOC100166545	uncharacterized LOC100166545	395.489	518.405	817.764	114.038	95.8447	103.47	4.2647e-07	-3.45468	1.69739e-11	0.0912088	6.37011
MSTRG.6622	LOC100569129	collagen alpha-1(V) chain-like	397.133	430.479	262.15	107.957	31.5556	55.7995	0.00552493	-3.45073	2.19898e-07	0.0914589	2.25767
MSTRG.18249	LOC100575047	possible pseudogene or miscRNA, No KEGG entry	897.432	1005.78	1569.79	304.586	225.847	102.547	0.000295464	-3.43659	1.17598e-08	0.09236	3.5295
MSTRG.25168	LOC100574804	possible pseudogene or miscRNA, No KEGG entry	102.156	109.671	81.4781	24.0248	18.0592	10.9138	0.000362106	-3.43412	1.44122e-08	0.0925181	3.44116
MSTRG.4037	LOC100165786	elongation factor 1-alpha-like	28826.9	30522.9	39808.9	7408.78	5705.36	4923.32	1.04047e-26	-3.43046	4.14118e-31	0.0927533	25.9828
MSTRG.20961	LOC100161159	alpha-N-acetylgalactosaminidase-like	2117.71	3430.11	2195.33	444.975	416.321	538.483	1.20395e-21	-3.42483	4.79186e-26	0.093116	20.9194
MSTRG.17511	LOC100169171	cuticular protein-like	15722	20270.4	16104.9	3860.01	2780.43	2820.46	4.55061e-39	-3.42073	1.81119e-43	0.0933806	38.3419
MSTRG.4555	LOC115033449	#N/A	1343.82	1255.2	1245.53	221.095	272.656	218.182	1.1466e-24	-3.38108	4.56359e-29	0.0959825	23.9406
MSTRG.8706	LOC100165393	uncharacterized LOC100165393	453.706	667.383	843.371	136.813	77.4924	155.539	1.07456e-05	-3.36412	4.27685e-10	0.097118	4.96877
MSTRG.5087	#N/A	#N/A	378.109	438.05	372.886	83.8795	61.4934	77.9554	7.47975e-12	-3.36228	2.97701e-16	0.097242	11.1261
MSTRG.24812	#N/A	#N/A	170.54	174.526	148.207	38.3612	27.1293	27.6539	1.47719e-07	-3.35863	5.87937e-12	0.0974882	6.83056
MSTRG.15844	LOC100169018	uncharacterized LOC100169018	2356.7	2504.5	3175.45	507.368	443.183	565.025	2.34048e-27	-3.35487	9.31536e-32	0.0977425	26.6307
MSTRG.5304	LOC100162620	uncharacterized LOC100162620	11383.5	18019	11283.2	3320.36	1942.66	2368.67	1.69537e-17	-3.34791	6.74773e-22	0.0982154	16.7707
MSTRG.7651	LOC100161332	uncharacterized LOC100161332	6678.93	6185.4	11305.1	1547.87	1271.21	1776.81	8.64161e-14	-3.34573	3.43945e-18	0.0983639	13.0634
MSTRG.20577	LOC100161410	uncharacterized LOC100161410	1143.54	1574.57	757.046	263.589	212.848	181.087	6.4835e-10	-3.32567	2.5805e-14	0.0997412	9.18819
MSTRG.1746	#N/A	#N/A	130.048	174.608	219.251	39.0732	24.7875	36.4942	6.55531e-05	-3.32469	2.60908e-09	0.0998091	4.18341
MSTRG.21134	LOC100167459	uncharacterized LOC100167459	5113.55	5418.88	4770.49	1192.22	862.41	860.578	5.80704e-39	-3.32375	2.31126e-43	0.099874	38.236
MSTRG.19949	LOC100169058	amyloid beta A4 precursor protein-binding family B member 1-interacting protein-like	5797.27	5781.07	6789.44	1513.48	1107.29	909.992	1.31478e-24	-3.31275	5.23297e-29	0.100638	23.8811
MSTRG.9680	LOC100161081	cuticular protein CPG12-like	1689.21	1860.24	1463.06	470.903	236.528	256.088	3.19189e-11	-3.30267	1.2704e-15	0.101344	10.496
MSTRG.5705	LOC100164556	transient-receptor-potential-like protein-like	955.863	897.523	875.122	191.524	130.99	205.867	9.37e-15	-3.29471	3.72935e-19	0.101905	14.0283
MSTRG.22239	LOC100573000	uncharacterized LOC100573000	201.855	236.159	243.505	67.927	33.1371	32.8912	0.000130352	-3.27185	5.18812e-09	0.103532	3.88488
MSTRG.5154	LOC100161452	putative fatty acyl-CoA reductase CG5065-like	65.5756	123.651	97.8551	18.4377	21.7136	17.9238	0.00313423	-3.25415	1.24745e-07	0.10481	2.50387
MSTRG.21455	LOC103311944	#N/A	600.527	556.2	658.462	105.622	121.035	132.57	4.11314e-13	-3.25022	1.63707e-17	0.105096	12.3858
MSTRG.4479	#N/A	#N/A	506.391	471.766	558.2	129.811	99.2139	77.9536	2.10738e-09	-3.23547	8.38756e-14	0.106176	8.67626
MSTRG.13030	#N/A	#N/A	368.125	322.749	366.499	85.3007	74.4953	52.2884	1.64707e-08	-3.21868	6.55548e-13	0.107419	7.78329
MSTRG.5257	LOC115033050	#N/A	193.192	186.487	185.256	42.9661	39.4771	31.1914	9.08618e-08	-3.21245	3.61639e-12	0.107884	7.04162
MSTRG.17516	LOC100167306	#N/A	2080.58	2434.33	3715.38	591.776	495.285	580.055	1.5123e-14	-3.21148	6.0191e-19	0.107956	13.8204
MSTRG.24058	#N/A	#N/A	67.8722	67.6957	63.7759	15.063	9.75531	16.3609	0.00347936	-3.20832	1.38482e-07	0.108193	2.4585
MSTRG.6830	LOC100166008	uncharacterized LOC100166008	749.073	1306.61	814.453	195.208	184.528	199.63	1.61224e-11	-3.19818	6.41688e-16	0.108956	10.7926
MSTRG.15320	LOC100163885	alpha-aminoadipic semialdehyde synthase, mitochondrial-like	536.796	808.8	837.154	105.615	135.568	202.315	1.16974e-06	-3.19261	4.65567e-11	0.109377	5.93191
MSTRG.11162	LOC100162435	uncharacterized LOC100162435	568.132	448.07	369.354	76.7787	78.9599	125.54	5.23447e-07	-3.18826	2.08337e-11	0.109708	6.28113
MSTRG.3132	LOC100569010	uncharacterized LOC100569010	897.738	1258.09	941.493	254.736	213.024	164.362	4.8441e-13	-3.1781	1.928e-17	0.110483	12.3148
MSTRG.21457	LOC100572030	histone H2A-like	130.97	155.107	150.558	34.5434	23.292	32.0961	5.41004e-06	-3.17225	2.15325e-10	0.110932	5.2668
MSTRG.22887	LOC100569077	uncharacterized LOC100569077	163.515	130.604	186.954	43.4488	27.0323	29.3722	0.000100281	-3.1684	3.99127e-09	0.111229	3.99878
MSTRG.11694	LOC100165536	roundabout homolog 2-like	3391.72	3201.57	3930.33	789.181	724.861	656.787	1.653e-34	-3.16672	6.57909e-39	0.111358	33.7817
MSTRG.9682	LOC115033801	#N/A	149.763	201.414	131.727	46.4725	30.0618	24.064	0.000453653	-3.15847	1.80559e-08	0.111997	3.34328
MSTRG.10375	LOC100164006	matrix metalloproteinase-16-like	284.522	269.93	384.251	82.8711	56.0335	57.5737	2.45954e-06	-3.15387	9.7892e-11	0.112354	5.60915
MSTRG.8813	LOC100166927	uncharacterized LOC100166927	1250.29	427.049	988.296	203.586	169.998	184.633	0.00110802	-3.14343	4.41005e-08	0.113171	2.95545
MSTRG.17038	LOC100166221	alpha-aminoadipic semialdehyde synthase, mitochondrial-like	2904.19	3807.47	2605.5	598.339	544.855	791.756	6.39228e-22	-3.13669	2.54419e-26	0.113701	21.1943
MSTRG.8251	LOC100167369	tyrosine 3-monooxygenase-like	159.055	268.197	136.815	41.9058	39.2408	37.2996	0.00025105	-3.12494	9.99204e-09	0.11463	3.60024
MSTRG.10280	LOC100167672	protein dachsous-like	3318.49	3396.98	3124.66	892.608	650.637	534.104	2.51976e-22	-3.11159	1.00289e-26	0.115696	21.5986
MSTRG.18266	LOC100163652	cytochrome P450 18a1-like	417.883	455.485	364.646	126.157	83.5599	53.1499	6.32375e-05	-3.10344	2.51692e-09	0.116351	4.19903
MSTRG.7653	Cp68	cuticular protein 68	2595.28	4230.13	4038.22	1011.38	568.6	725.559	7.56997e-12	-3.10287	3.01292e-16	0.116398	11.1209
MSTRG.11143	LOC100575359	uncharacterized LOC100575359	1520.17	1224.04	1272.85	275.689	316.155	263.16	4.28019e-20	-3.09671	1.70356e-24	0.116895	19.3685
MSTRG.7634	LOC100164760	uncharacterized LOC100164760	7681.84	6869.5	9046.01	2083.41	1404.05	1557.69	1.85933e-23	-3.09381	7.40033e-28	0.117131	22.7306
MSTRG.21356	LOC100575545	histone H3-like	658.59	826.911	581.109	187.431	103.579	148.599	2.50744e-08	-3.0928	9.97988e-13	0.117213	7.60077
MSTRG.15309	LOC107885023	#N/A	291.053	329.193	394.92	105.051	68.3144	45.2156	0.00036367	-3.08979	1.44744e-08	0.117457	3.43929
MSTRG.4478	LOC100165433	possible pseudogene or miscRNA, No KEGG entry	199.416	202.587	185.023	61.0524	28.0266	37.4808	0.000254229	-3.08159	1.01186e-08	0.118127	3.59477
MSTRG.4855	LOC100166245	alpha-tocopherol transfer protein-like	228.816	243.485	112.905	35.1378	47.7812	40.8668	0.00233852	-3.08075	9.30756e-08	0.118196	2.63106
MSTRG.17636	#N/A	#N/A	121.712	122.858	152.345	22.3614	28.7749	34.8076	0.00020311	-3.06914	8.08396e-09	0.119151	3.69227
MSTRG.11715	LOC100159063	uncharacterized protein LOC100159063	531.347	681.629	1094.59	173.987	128.719	198.77	4.54704e-05	-3.06741	1.80977e-09	0.119294	4.34227
MSTRG.8289	LOC100572275	uncharacterized LOC100572275	5901.34	6190.69	7868.84	1696.47	1372.06	1252.41	5.71818e-26	-3.0671	2.27589e-30	0.119319	25.2427
MSTRG.10157	LOC100159803	peroxidase-like	67.6758	103.133	65.8515	17.6779	17.1342	16.1674	0.008341	-3.05863	3.3198e-07	0.120022	2.07878
MSTRG.19408	LOC100575164	angiotensin-converting enzyme-like	250.477	380.918	376.024	85.9301	72.1246	63.7617	1.52991e-06	-3.04361	6.08918e-11	0.121278	5.81534
MSTRG.18235	#N/A	#N/A	422.596	439.616	728.387	112.468	134.087	103.448	1.08058e-05	-3.04319	4.30082e-10	0.121313	4.96634
MSTRG.16076	LOC100162594	probable cytochrome P450 6a14-like	215.541	306.242	273.541	81.6982	49.2622	44.3779	0.000123953	-3.03612	4.93345e-09	0.121909	3.90674
MSTRG.2411	LOC100163954	uncharacterized LOC100163954	742.597	980.2	393.482	174.077	162.449	122.868	0.000116422	-3.03523	4.63371e-09	0.121984	3.93397
MSTRG.856	LOC100167857	uncharacterized LOC100167857	191.051	230.633	199.689	66.7922	44.0932	25.8699	0.0036416	-3.03172	1.44939e-07	0.122282	2.43871
MSTRG.19962	LOC100164049	laccase-5-like	1466.88	1450.85	1317.26	245.301	352.095	332.879	3.69328e-18	-3.02606	1.46996e-22	0.122762	17.4326
MSTRG.19917	LOC100160737	cuticle protein-like	1089.33	891.371	1314.27	211.219	324.61	194.356	2.04454e-08	-3.01954	8.13746e-13	0.123318	7.68941
MSTRG.21907	LOC100165514	fibrillin-2-like	2586.52	2914.01	2929.85	673.605	665.845	523.484	7.79036e-31	-3.01804	3.10064e-35	0.123447	30.1084
MSTRG.18564	LOC100166947	cAMP-specific 3',5'-cyclic phosphodiesterase-like	677.158	654.663	1014.37	202.051	179.95	141.381	8.87169e-08	-3.01479	3.53102e-12	0.123725	7.05199
MSTRG.11827	LOC100162025	uncharacterized LOC100162025	12807.6	12189.4	14237.2	3486.82	2852.55	2362.52	2.33197e-29	-3.0142	9.28147e-34	0.123776	28.6323
MSTRG.25521	#N/A	#N/A	88.7366	100.168	131.235	27.1226	21.1599	23.3301	0.00160194	-3.00909	6.3759e-08	0.124215	2.79535
MSTRG.7268	LOC100161334	uncharacterized LOC100161334	710.191	541.043	518.089	136.135	90.4625	166.211	1.02393e-06	-3.00514	4.07533e-11	0.124555	5.98973
MSTRG.25377	#N/A	#N/A	80.8632	85.0591	100.696	14.0129	24.2464	21.5477	0.00673337	-3.00287	2.67995e-07	0.124751	2.17177
MSTRG.8275	LOC100167964	uncharacterized LOC100167964	1468.5	1462.7	1413	368.501	382.128	217.275	2.15182e-12	-3.00049	8.56446e-17	0.124958	11.6672
MSTRG.4034	LOC100163340	elongation factor 1-alpha-like	11655.2	11476.3	16031.5	3099.38	2614.47	3090.55	2.26728e-25	-2.99024	9.02402e-30	0.125848	24.6445
MSTRG.12964	LOC100163715	uncharacterized LOC100163715	1454.5	1122.55	1259.31	344.055	182.281	339.079	1.54797e-08	-2.9782	6.16108e-13	0.126903	7.81024
MSTRG.20834	LOC100164522	uncharacterized LOC100164522	624.664	546.479	702.889	185.018	144.996	93.7666	3.53143e-06	-2.97792	1.40554e-10	0.126928	5.45205
MSTRG.21460	LOC115034410	#N/A	358.691	403.674	487.93	113.048	72.3087	98.3474	8.26341e-07	-2.97014	3.28892e-11	0.127615	6.08284
MSTRG.21862	LOC100570277	histone H2A-like	129.668	95.9543	105.052	29.959	21.0047	24.1373	0.000711053	-2.96169	2.83006e-08	0.128364	3.1481
MSTRG.15294	LOC115034096	#N/A	1053.37	1224.86	1067.26	319.879	216.695	226.117	8.85934e-14	-2.94891	3.52611e-18	0.129506	13.0526
MSTRG.20131	LOC100160682	glucose dehydrogenase [acceptor]-like	592.247	640.293	563.836	182.441	146.356	81.3763	1.64438e-05	-2.94826	6.54478e-10	0.129565	4.784
MSTRG.9568	LOC100165656	tolloid-like protein 2-like	3174.65	2644.14	3509.15	801.08	652.745	686.73	1.75905e-24	-2.94579	7.00118e-29	0.129786	23.7547
MSTRG.12632	LOC103310238	#N/A	1585.92	1245.64	1241.57	455.918	189.107	292.315	5.78179e-06	-2.93387	2.30121e-10	0.130863	5.23794
MSTRG.5404	LOC100161704	facilitated trehalose transporter Tret1-like	3537.71	4607.2	3268.93	889.912	746.083	978.84	5.14413e-26	-2.93363	2.04741e-30	0.130885	25.2887
MSTRG.20920	LOC100166039	uncharacterized LOC100166039	1429.04	1640.89	1297.17	407.876	345.241	248.151	7.09763e-14	-2.93339	2.82493e-18	0.130907	13.1489
MSTRG.5752	ACYPI50196	#N/A	5432.75	5910.5	3242.78	883.058	1049.82	1398.88	6.62133e-12	-2.93269	2.63535e-16	0.13097	11.1791
MSTRG.22765	LOC100573886	histone H2B.3-like	842.553	843.504	920.857	235.904	160.989	205.067	3.19303e-12	-2.93083	1.27086e-16	0.131139	11.4958
MSTRG.5020	LOC115033774	#N/A	183.917	164.928	160.894	39.2112	53.5391	25.0141	0.00156157	-2.92972	6.2152e-08	0.13124	2.80644
MSTRG.8471	#N/A	#N/A	159.904	134.834	199.154	41.7097	28.0523	45.513	0.00130931	-2.92189	5.2112e-08	0.131954	2.88296
MSTRG.17242	LOC100165110	oocyte zinc finger protein XlCOF8.4-like	729.252	651.209	564.453	164.104	135.576	151.106	1.44283e-11	-2.91933	5.74262e-16	0.132188	10.8408
MSTRG.11359	LOC100166921	esterase FE4-like	1406.35	1575.84	618.658	340.982	216.655	269.34	0.000260688	-2.91886	1.03756e-08	0.132232	3.58388
MSTRG.19448	LOC100163191	uncharacterized LOC100163191	295.939	241.615	172.279	70.2075	43.8791	50.5713	0.000363565	-2.91298	1.44702e-08	0.132771	3.43942
MSTRG.20369	LOC100162609	uncharacterized LOC100162609	303.779	226.77	292.888	91.2346	65.2279	36.4021	0.00843916	-2.90887	3.35887e-07	0.133151	2.0737
MSTRG.21442	LOC100159883	histone H1-like	170.293	171.569	227.645	34.309	44.6006	54.9694	0.000293344	-2.90875	1.16754e-08	0.133162	3.53262
MSTRG.22163	#N/A	#N/A	88.4718	105.362	83.325	17.1968	26.7469	20.7154	0.00351582	-2.9058	1.39933e-07	0.133434	2.45397
MSTRG.21456	LOC100164039	histone H2B.3-like	293.818	260.044	255.623	54.151	59.2422	76.2297	8.26772e-07	-2.89912	3.29063e-11	0.134054	6.08261
MSTRG.24926	LOC100569643	glutamine synthetase 2 cytoplasmic-like	663.435	839.289	1122.04	211.954	165.409	242.03	4.22232e-07	-2.89275	1.68053e-11	0.134647	6.37445
MSTRG.12312	LOC100167145	heat shock protein 70 B2-like	562.641	557.247	631.953	154.292	138.691	120.224	3.04835e-10	-2.88793	1.21327e-14	0.135097	9.51594
MSTRG.20195	LOC100158867	glucose dehydrogenase [acceptor]-like	502.789	583.361	992.117	195.242	164.68	134.345	0.000241181	-2.88558	9.59926e-09	0.135317	3.61766
MSTRG.23113	#N/A	#N/A	217.214	196.398	277.784	68.2472	49.453	47.1138	0.000128307	-2.87745	5.10674e-09	0.136082	3.89175
MSTRG.12054	LOC100161376	uncharacterized LOC100161376	495.613	549.482	540.425	160.125	107.515	109.74	4.13123e-08	-2.86984	1.64427e-12	0.136802	7.38392
MSTRG.10712	LOC100165726	thyrotropin-releasing hormone-degrading ectoenzyme-like	3106.65	4097.69	8042.46	1288.53	1371.22	998.225	0.000169312	-2.86657	6.73878e-09	0.137112	3.77131
MSTRG.2889	LOC100167645	uncharacterized LOC100167645	1542.31	1391.41	1006.67	338.711	283.237	310.823	2.44147e-14	-2.86627	9.71728e-19	0.13714	13.6123
MSTRG.17675	LOC100168564	uncharacterized LOC100168564	197.947	176.889	196.565	52.0812	50.9934	34.7083	5.39512e-05	-2.85204	2.14731e-09	0.1385	4.268
MSTRG.3303	LOC100164548	uncharacterized LOC100164548	3549.59	3580.82	3583.07	1017.73	781.406	768.847	7.19347e-30	-2.84879	2.86307e-34	0.138812	29.1431
MSTRG.11680	LOC100158702	uncharacterized LOC100158702	1432.61	1784.53	1195.1	382.006	299.287	372.603	3.59128e-15	-2.847	1.42937e-19	0.138985	14.4448
MSTRG.13980	LOC100167863	uncharacterized LOC100167863	473.179	797.047	957.991	206.636	135.61	196.126	0.000204365	-2.83881	8.13393e-09	0.139776	3.68959
MSTRG.7206	LOC100163552	uncharacterized LOC100163552	916.788	1267	1182.31	312.958	268.729	233.164	1.97189e-12	-2.8306	7.8483e-17	0.140574	11.7051
MSTRG.9089	LOC100160558	ATP-binding cassette sub-family G member 1-like	1979.37	3021.75	2105.53	653.167	449.265	608.25	2.37112e-14	-2.83052	9.43728e-19	0.140582	13.625
MSTRG.21289	LOC100169317	uncharacterized LOC100169317	384.013	620.634	439.469	129.208	107.317	111.414	7.81138e-07	-2.82758	3.10901e-11	0.140869	6.10727
MSTRG.20488	LOC100160289	heat shock protein 70 A1-like	1408.77	1353.86	2146.91	479.989	391.129	328.459	6.80269e-09	-2.82177	2.70754e-13	0.141437	8.16732
MSTRG.6767	LOC100569281	growth/differentiation factor 8-like	931.526	936.484	1134.55	256.432	210.838	263.382	8.6496e-13	-2.82171	3.44263e-17	0.141443	12.063
MSTRG.12394	LOC100161747	sialin-like	1268.39	1146.46	2083.4	317.444	369.712	413.21	3.52778e-07	-2.82124	1.40409e-11	0.141489	6.4525
MSTRG.14626	LOC100164723	uncharacterized LOC100164723	163.658	235.224	312.863	48.72	58.3615	67.3134	0.0041402	-2.81799	1.64784e-07	0.141808	2.38298
MSTRG.14187	LOC100159613	circadian clock-controlled protein-like	207.936	187.631	134.422	54.0779	38.5052	36.4308	0.000756834	-2.81766	3.01227e-08	0.141841	3.121
MSTRG.21909	LOC100168549	uncharacterized LOC100168549	624.628	713.807	629.418	133.711	160.063	185.53	3.45371e-10	-2.81493	1.37461e-14	0.142109	9.46171
MSTRG.10744	LOC103308186	#N/A	123.871	120.582	92.678	36.9775	21.0538	24.1626	0.00598854	-2.81387	2.3835e-07	0.142214	2.22268
MSTRG.11508	LOC100573813	uncharacterized LOC100573813	76.9045	101.233	109.863	19.9303	24.757	25.8632	0.00927544	-2.81331	3.69172e-07	0.142269	2.03267
MSTRG.22226	#N/A	#N/A	228.7	213.551	204.098	61.9731	52.4647	45.3113	7.42304e-06	-2.78937	2.95444e-10	0.144649	5.12942
MSTRG.22591	#N/A	#N/A	105.515	107.697	119.106	31.8242	27.4229	23.3436	0.000852553	-2.78698	3.39324e-08	0.144889	3.06928
MSTRG.23150	#N/A	#N/A	191.902	177.744	103.745	37.6181	37.189	41.8523	0.00461215	-2.77947	1.83568e-07	0.145646	2.3361
MSTRG.20132	LOC100169582	glucose dehydrogenase [acceptor]-like	131.221	117.598	165.854	28.3185	33.2219	40.9092	0.00296896	-2.77793	1.18167e-07	0.145801	2.5274
MSTRG.10698	LOC100161789	uncharacterized LOC100161789	2877.18	2868.69	3025.25	1203.38	577.868	400.813	0.00117604	-2.7751	4.68077e-08	0.146087	2.92958
MSTRG.9567	LOC100166362	ATP-binding cassette sub-family F member 1-like	181.742	267.506	286.731	56.3567	69.1516	58.4914	0.000226045	-2.77288	8.99683e-09	0.146312	3.6458
MSTRG.21226	LOC107882134	#N/A	363.237	399.675	726.357	107.942	121.105	144.1	0.00391562	-2.77229	1.55846e-07	0.146372	2.4072
MSTRG.21171	LOC100159184	membrane metallo-endopeptidase-like 1-like	3211.52	5603.54	4672.69	1347.04	993.226	1007.95	3.83761e-13	-2.77209	1.52741e-17	0.146392	12.4159
MSTRG.8918	Cpap3-d2	cuticular protein analogous to peritrophins 3-D2	4659.11	4254.16	4562.66	1152.8	1157.14	1045.95	1.82491e-39	-2.77005	7.26332e-44	0.146599	38.7388
MSTRG.3193	LOC100165391	protein kinase C-binding protein NELL1-like	597.472	661.862	583.18	185.729	131.912	142.364	2.58218e-09	-2.76702	1.02773e-13	0.146907	8.58801
MSTRG.24582	LOC100569694	possible pseudogene or miscRNA, No KEGG entry	1497.1	2018.28	2481.78	556.644	402.62	545.571	2.69809e-10	-2.75959	1.07387e-14	0.147666	9.56894
MSTRG.20771	LOC115034474	#N/A	100.161	107.64	92.6405	22.3835	28.8199	25.0633	0.00150609	-2.75817	5.99439e-08	0.147811	2.82215
MSTRG.19611	LOC100165921	uncharacterized LOC100165921	3396.29	3483.57	2980.36	974.938	544.862	945.301	7.49323e-13	-2.75734	2.98238e-17	0.147896	12.1253
MSTRG.25359	LOC115035086	#N/A	374.947	397.172	368.667	80.7456	111.426	94.7328	1.38598e-07	-2.75584	5.51635e-12	0.148051	6.85824
MSTRG.12622	LOC100159790	ATP-binding cassette sub-family A member 1-like	4334.28	4712.25	4388.09	1268.88	1134.07	961.183	8.40178e-33	-2.7554	3.34399e-37	0.148096	32.0756
MSTRG.1564	LOC100569299	uncharacterized LOC100569299	141.612	106.876	156.926	35.8678	35.4621	31.1419	0.00239728	-2.75172	9.5414e-08	0.148474	2.62028
MSTRG.10120	LOC100167948	uncharacterized LOC100167948	3664.36	3386.41	3347.13	578.594	999.381	1032.68	1.5645e-12	-2.74911	6.22688e-17	0.148742	11.8056
MSTRG.13994	LOC100163875	uncharacterized LOC100163875	5206.82	5284.95	4705.07	1259.93	1229.87	1333.7	3.831e-46	-2.74354	1.52478e-50	0.149318	45.4167
MSTRG.20126	LOC115034395	#N/A	245.247	215.83	230.962	71.6038	59.9453	43.4717	0.000116747	-2.74076	4.64666e-09	0.149606	3.93275
MSTRG.205	LOC115033447	#N/A	1921.71	1953.36	2032.24	586.541	356.733	550.966	1.95938e-13	-2.73753	7.79852e-18	0.149942	12.7079
MSTRG.11344	LOC100159423	uncharacterized LOC100159423	4993.85	4272.57	4264.96	1485.34	847.852	1097.98	6.32108e-15	-2.73148	2.51585e-19	0.150572	14.1992
MSTRG.7237	LOC103310063	#N/A	187.432	201.589	199.087	61.5537	47.2896	40.9696	8.22135e-05	-2.72654	3.27218e-09	0.151088	4.08506
MSTRG.22652	LOC100570349	heat shock protein 68-like	702.136	585.66	1160.96	241.605	188.389	197.884	0.000276068	-2.72506	1.09878e-08	0.151243	3.55898
MSTRG.20876	LOC100160762	uncharacterized LOC100160762	89.0991	116.178	83.5925	25.3395	24.8457	23.2484	0.004624	-2.72385	1.8404e-07	0.15137	2.33498
MSTRG.20473	LOC100159632	uncharacterized LOC100159632	481.09	558.489	884.773	202.077	183.819	109.637	0.00532174	-2.71632	2.11811e-07	0.152162	2.27395
MSTRG.11161	LOC100160404	uncharacterized LOC100160404	234.007	189.983	227.731	47.2087	50.7102	69.0947	0.000205156	-2.71223	8.16541e-09	0.152594	3.68792
MSTRG.2023	#N/A	#N/A	775.023	921.256	834.548	167.136	160.06	320.658	9.49845e-05	-2.71039	3.78048e-09	0.152789	4.02235
MSTRG.21865	LOC100164566	histone H2A-like	114.849	92.6475	82.06	25.4129	21.0461	27.7119	0.00992147	-2.70381	3.94884e-07	0.153487	2.00342
MSTRG.11343	LOC100168314	uncharacterized LOC100168314	3354.48	2552.24	2774.19	974.372	598.454	665.574	5.23297e-13	-2.69815	2.08277e-17	0.15409	12.2813
MSTRG.8953	LOC100167717	innexin inx7-like	8998.62	8945.37	11017.5	2732.78	2342.95	2418.15	9.46009e-30	-2.69441	3.76521e-34	0.154491	29.0241
MSTRG.22752	#N/A	#N/A	176.34	171.451	181.896	40.6273	32.4991	64.0142	0.00688341	-2.68824	2.73967e-07	0.155152	2.1622
MSTRG.20018	LOC100572358	putative tyramine receptor 2-like	884.621	946.195	901.9	315.305	231.252	162.559	7.74082e-07	-2.68483	3.08092e-11	0.15552	6.11121
MSTRG.19209	LOC100168822	uncharacterized LOC100168822	1560.95	1631.56	2298.81	517.181	551.074	362.903	4.24362e-09	-2.68436	1.689e-13	0.155571	8.37226
MSTRG.14693	LOC115034122	#N/A	184.143	148.79	130.359	46.0068	37.9169	37.3941	0.00074554	-2.67692	2.96732e-08	0.156375	3.12753
MSTRG.10321	#N/A	#N/A	131.717	120.694	124.624	41.6761	32.7071	25.0588	0.00422018	-2.66818	1.67967e-07	0.157325	2.37467
MSTRG.19678	ACYPI56502	#N/A	208.009	171.621	199.112	50.2657	43.0759	58.4939	0.000167387	-2.6663	6.66218e-09	0.15753	3.77628
MSTRG.18997	LOC100161508	uncharacterized LOC100161508	11593.1	14738.7	16360.7	2979.29	4541.71	3672.92	1.05254e-15	-2.66327	4.18923e-20	0.157862	14.9778
MSTRG.11989	LOC100166777	uncharacterized LOC100166777	3285.52	4804.95	3502.97	1110.15	896.071	1022.97	1.49269e-20	-2.6615	5.94105e-25	0.158055	19.826
MSTRG.1064	LOC100164072	cytochrome P450 4g15-like	100491	96685.6	126535	29718.1	27048.9	28687.5	2.47737e-28	-2.65389	9.86018e-33	0.158891	27.606
MSTRG.24684	#N/A	#N/A	1147.75	1285.39	1105.46	380.098	288.777	262.346	1.70831e-12	-2.6531	6.79923e-17	0.158979	11.7674
MSTRG.12180	LOC100160315	uncharacterized LOC100160315	2783.48	2703.39	2952.98	935.933	695.057	598.549	1.11784e-16	-2.64948	4.44913e-21	0.159377	15.9516
MSTRG.22373	#N/A	#N/A	3570.19	3653.26	3865.82	1092.17	955.942	880.061	1.02619e-29	-2.64809	4.08436e-34	0.159531	28.9888
MSTRG.16915	LOC100160121	uncharacterized LOC100160121	1187.32	1059.64	665.118	309.887	238.893	216.413	1.87827e-06	-2.64762	7.4757e-11	0.159583	5.72624
MSTRG.8578	#N/A	#N/A	888.572	1046.81	1248.38	341.792	175.407	326.739	5.15184e-05	-2.64367	2.05048e-09	0.16002	4.28804
MSTRG.639	LOC100169643	uncharacterized LOC100169643	345.62	354.079	389.892	108.878	96.7237	84.0886	1.17999e-06	-2.6414	4.69647e-11	0.160273	5.92812
MSTRG.24538	LOC103310662	#N/A	87.75	107.625	98.5233	23.169	30.3958	25.0719	0.00954298	-2.63453	3.7982e-07	0.161038	2.02032
MSTRG.20394	#N/A	#N/A	2234.73	2218.22	2579.06	694.262	653.726	526.171	2.90105e-19	-2.63208	1.15465e-23	0.161311	18.5374
MSTRG.9360	#N/A	#N/A	253.74	252.424	242.606	78.0559	65.5607	56.8135	1.53124e-05	-2.63169	6.09448e-10	0.161355	4.81496
MSTRG.6552	LOC100165518	cadherin-related tumor suppressor-like	4230.96	4664.61	3974.48	1389.19	1158.01	873.864	1.00924e-18	-2.62937	4.01687e-23	0.161614	17.996
MSTRG.21335	LOC100568607	eye-specific diacylglycerol kinase-like	293.104	316.127	258.809	108.963	59.148	63.7839	0.00172935	-2.62468	6.88298e-08	0.16214	2.76212
MSTRG.10891	LOC100168223	uncharacterized LOC100168223	589.653	1019.72	1314.22	250.668	243.483	289.666	0.000526414	-2.62466	2.09518e-08	0.162143	3.27867
MSTRG.4796	LOC100162198	tRNA dimethylallyltransferase	580.822	562.746	756.697	180.961	167.082	161.746	1.66734e-07	-2.62172	6.63619e-12	0.162474	6.77798
MSTRG.5976	LOC100167668	uncharacterized LOC100167668	1223.31	1293	1052.75	359.389	296.337	296.744	8.30424e-15	-2.62046	3.30517e-19	0.162616	14.0807
MSTRG.10782	LOC100169243	uncharacterized LOC100169243	5670.79	8003.11	12224.4	2198.08	2639.71	2162.19	6.56922e-07	-2.61104	2.61462e-11	0.163681	6.18249
MSTRG.4810	LOC100159188	amino acid transporter, cationic AA transmembrane	1631.11	1307.41	1797.05	370.609	360.517	545.626	6.97302e-09	-2.61072	2.77533e-13	0.163717	8.15658
MSTRG.16988	LOC100161949	polyserase-2-like	597.983	530.208	446.132	168.709	134.079	120.222	1.24327e-06	-2.60904	4.94834e-11	0.163908	5.90543
MSTRG.22437	#N/A	#N/A	4524.5	4562.08	4483.43	1430.83	1174.75	1043.3	5.85681e-27	-2.60904	2.33107e-31	0.163909	26.2323
MSTRG.10178	#N/A	#N/A	723.467	588.416	339.257	138.51	161.147	141.502	0.000995725	-2.60774	3.96309e-08	0.164056	3.00186
MSTRG.24649	#N/A	#N/A	211.49	201.607	158.091	49.7904	58.7416	46.2315	0.000235528	-2.60689	9.37426e-09	0.164153	3.62796
MSTRG.7214	LOC100161811	facilitated trehalose transporter Tret1-like, Sugar transporters; similar to AGAP007667-PA	4008.09	5097.98	4510.48	1313.63	1048.32	1304.48	1.08668e-25	-2.60368	4.32511e-30	0.164519	24.9639
MSTRG.11606	LOC100164011	ATP-binding cassette sub-family G member 1-like	525.172	845.26	481.256	139.826	194.629	161.724	9.04401e-05	-2.60154	3.59961e-09	0.164763	4.04364
MSTRG.24953	#N/A	#N/A	4315.59	4442.1	4254.09	1392.89	1121.96	995.648	2.30746e-25	-2.60149	9.18391e-30	0.164768	24.6369
MSTRG.10420	LOC100159087	uncharacterized LOC100159087	675.165	775.719	1242.26	271.17	204.466	257.016	0.000161211	-2.5984	6.41636e-09	0.165121	3.7926
MSTRG.22851	#N/A	#N/A	681.015	652.507	1081.33	222.903	252.311	187.377	7.66705e-05	-2.58271	3.05156e-09	0.166927	4.11537
MSTRG.6998	LOC100169261	UDP-glucuronosyltransferase 1-9-like	1822	2453.4	1423.46	582.456	359.711	601.177	3.60052e-07	-2.58174	1.43304e-11	0.167039	6.44363
MSTRG.3063	LOC100163203	uncharacterized LOC100163203	2073.6	2201.92	2305.35	731.666	561.937	504.14	1.91312e-16	-2.57891	7.6144e-21	0.167367	15.7183
MSTRG.24607	#N/A	#N/A	5037.1	5128.35	5082.43	1629.76	1343.84	1188.02	3.68086e-27	-2.57814	1.46502e-31	0.167457	26.4341
MSTRG.6152	LOC100164519	reversion-inducing cysteine-rich protein with Kazal motifs-like	2291.11	2114.49	2635.44	779.771	695.373	457.382	2.1761e-10	-2.57301	8.66109e-15	0.168053	9.66232
MSTRG.24444	ACYPI45001	#N/A	346.21	365.957	343.078	92.7643	69.0639	127.324	0.000418282	-2.57251	1.6648e-08	0.168112	3.37853
MSTRG.24842	LOC115035027	#N/A	246.178	268.686	301.231	80.9308	79.299	64.7281	4.30265e-05	-2.57227	1.7125e-09	0.168139	4.36626
MSTRG.23135	LOC100575894	histone H1C-like	295.145	384.176	410.949	86.2457	79.2442	132.915	0.00154686	-2.56967	6.15664e-08	0.168443	2.81055
MSTRG.18281	LOC100575011	uncharacterized LOC100575011	1778.27	1886.43	2118.25	555.262	511.359	525.319	6.30694e-20	-2.56327	2.51022e-24	0.169192	19.2002
MSTRG.10965	#N/A	#N/A	259.454	213.691	246.429	72.6406	65.5302	60.3472	6.62037e-05	-2.56251	2.63497e-09	0.169281	4.17912
MSTRG.12691	LOC100165002	uncharacterized LOC100165002	3919.63	3790.59	4312.64	1228.79	1085.22	1002.71	1.47696e-26	-2.5589	5.87846e-31	0.169705	25.8306
MSTRG.10913	LOC100169480	probable chitinase 3-like	123.491	130.429	126.696	26.7433	40.8361	38.2159	0.00524736	-2.5588	2.0885e-07	0.169716	2.28006
MSTRG.21459	LOC115034411	#N/A	124.388	150.786	115.145	45.9092	29.3874	32.0598	0.0093275	-2.55804	3.71244e-07	0.169806	2.03023
MSTRG.12112	LOC100159152	proton-coupled amino acid transporter 4-like	5174.77	6009.08	5787.86	1916.5	1351.29	1410.35	1.4129e-21	-2.55718	5.6235e-26	0.169907	20.8499
MSTRG.16782	LOC100575056	uncharacterized LOC100575056	1107.34	1067.31	1333.49	380.434	315.068	279.211	2.15621e-10	-2.54798	8.58191e-15	0.170994	9.66631
MSTRG.134	LOC100166127	uncharacterized LOC100166127	1299.33	1157.27	1953.73	476.153	398.77	354.937	1.24174e-06	-2.54727	4.94224e-11	0.171078	5.90597
MSTRG.24671	#N/A	#N/A	247.067	239.568	283.716	56.5443	65.517	93.1473	0.00188483	-2.54152	7.50181e-08	0.171762	2.72473
MSTRG.5729	LOC100167793	uncharacterized LOC100167793	285.199	251.55	308.626	95.196	64.5105	77.0414	0.000267923	-2.53749	1.06636e-08	0.172243	3.57199
MSTRG.6315	LOC100167266	uncharacterized LOC100167266	1050.37	1075.77	897.794	365.918	272.848	201.458	6.75781e-07	-2.53713	2.68968e-11	0.172286	6.17019
MSTRG.21118	LOC103308152	#N/A	357.478	484.668	433.575	110.987	111.151	133.508	4.99873e-06	-2.53599	1.98955e-10	0.172422	5.30114
MSTRG.14304	LOC100159588	uncharacterized LOC100159588	1267.07	1191.58	1095.15	295.429	355.961	338.193	2.66607e-14	-2.53226	1.06112e-18	0.172868	13.5741
MSTRG.24679	#N/A	#N/A	219.54	193.134	221.799	62.0385	63.3407	52.4206	0.000160047	-2.52778	6.37005e-09	0.173405	3.79575
MSTRG.22270	#N/A	#N/A	343.003	292.638	409.416	114.41	102.252	77.0601	0.00056442	-2.52399	2.24645e-08	0.173861	3.2484
MSTRG.3267	LOC100166216	SSXT-domain containing protein	6086.45	6473.92	8921.57	2416.43	1859.52	1782.82	4.02629e-13	-2.51888	1.6025e-17	0.174479	12.3951
MSTRG.21875	#N/A	#N/A	521.783	974.937	662.187	202.981	197.709	204.129	3.06179e-05	-2.51534	1.21862e-09	0.174907	4.51403
MSTRG.21886	LOC100159582	uncharacterized LOC100159582	3296.71	3692.21	4152.15	1168.73	993.331	978.87	4.91897e-22	-2.51416	1.9578e-26	0.17505	21.3081
MSTRG.25316	#N/A	#N/A	382.493	335.645	279.827	106.094	86.1485	88.5953	2.54611e-05	-2.51345	1.01338e-09	0.175137	4.59412
MSTRG.9687	LOC100159914	cuticular protein-like	2099.82	2222.45	2280.95	768.166	482.287	610.974	1.91159e-13	-2.51217	7.60831e-18	0.175292	12.7186
MSTRG.544	LOC100161558	uncharacterized LOC100161558	2948.25	3278.32	3936.07	1083.13	976.678	814.765	2.10091e-16	-2.50896	8.36185e-21	0.175682	15.6776
MSTRG.17530	LOC100168665	protein odd-skipped-like	511.533	372.469	363.476	132.323	120.98	99.2619	7.6601e-05	-2.50179	3.0488e-09	0.176558	4.11577
MSTRG.24732	LOC100574604	possible pseudogene or miscRNA, No KEGG entry	3014.91	3680.17	3095.54	1158.04	788.195	822.643	3.66922e-16	-2.50098	1.46039e-20	0.176656	15.4354
MSTRG.2024	LOC100162064	papilin-like	4812.56	4019.85	5383.26	1593.91	1519.01	930.284	1.41041e-09	-2.49919	5.61357e-14	0.176876	8.85066
MSTRG.17979	LOC100163339	glutaryl-Coenzyme A dehydrogenase-like	2868.79	2862.46	4322.97	1052.51	796.63	1019.48	4.03619e-10	-2.49689	1.60644e-14	0.177158	9.39403
MSTRG.19658	LOC100572308	uncharacterized LOC100572308	739.875	487.423	1008.41	230.912	228.183	181.102	0.00448758	-2.49497	1.7861e-07	0.177394	2.34799
MSTRG.23861	#N/A	#N/A	678.662	726.809	711.309	222.144	180.925	198.875	1.86312e-09	-2.49247	7.41541e-14	0.177702	8.72976
MSTRG.10141	#N/A	#N/A	2476.79	2488.39	2820.75	871.235	681.222	665.621	1.19443e-18	-2.49235	4.75395e-23	0.177717	17.9228
MSTRG.21902	LOC100164500	steroid receptor seven-up, isoforms B/C-like	953.019	1023.98	885.969	352.573	245.806	217.292	1.0814e-07	-2.48783	4.30408e-12	0.178274	6.96601
MSTRG.9696	LOC100568832	uncharacterized LOC100568832	4047.96	3807.93	5363.17	1350.73	1227.9	1206.74	1.14971e-16	-2.48664	4.57596e-21	0.178422	15.9394
MSTRG.2419	LOC100165301	proton-coupled amino acid transporter 1-like	672.166	993.468	761.787	262.352	230.679	197.936	2.31278e-07	-2.48525	9.20511e-12	0.178593	6.63587
MSTRG.15364	LOC100161677	uncharacterized LOC100161677	549.948	570.182	582.788	187.097	136.437	164.418	4.24033e-07	-2.4791	1.68769e-11	0.179356	6.3726
MSTRG.22562	#N/A	#N/A	865.739	916.933	759.263	298.16	226.082	205.005	2.1539e-08	-2.47139	8.57274e-13	0.180318	7.66677
MSTRG.19674	ACYPI39568	#N/A	1071.17	1123.59	1310.56	481.48	186.105	342.612	0.00741002	-2.46978	2.94926e-07	0.180519	2.13018
MSTRG.8893	LOC100160326	uncharacterized protein LOC100160326	667.968	608.225	855.843	259.813	181.491	174.928	5.71289e-05	-2.46903	2.27379e-09	0.180613	4.24314
MSTRG.19697	LOC100569640	uncharacterized LOC100569640	670.888	580.151	918.295	236.514	243.775	148.482	0.00145275	-2.46676	5.7821e-08	0.180897	2.83781
MSTRG.736	LOC100167141	arylsulfatase B-like	613.941	896.07	476.156	194.627	132.556	242.142	0.00734085	-2.46055	2.92173e-07	0.181677	2.13425
MSTRG.1921	LOC100164176	uncharacterized LOC100164176	208.975	266.411	227.346	81.5079	59.9364	61.1459	0.000719588	-2.45651	2.86403e-08	0.182187	3.14292
MSTRG.2915	LOC100569420	uncharacterized LOC100569420	2431.23	2464.67	3132.83	839.29	802.941	689.445	3.06687e-16	-2.45634	1.22064e-20	0.182208	15.5133
MSTRG.11809	LOC100161712	uncharacterized LOC100161712	2524.47	2420.31	2731.18	945.087	727.245	554.418	2.92225e-11	-2.4551	1.16308e-15	0.182365	10.5343
MSTRG.6885	LOC100571993	uncharacterized LOC100571993	623.751	433.132	457.596	164.282	129.559	144.993	4.72524e-05	-2.45203	1.88069e-09	0.182753	4.32558
MSTRG.18405	LOC100167034	uncharacterized LOC100167034	524.274	673.918	738.748	166.371	218.283	179.354	7.84662e-06	-2.44536	3.12303e-10	0.1836	5.10532
MSTRG.19471	LOC100159134	monocarboxylate transporter, MCT, pyruvate cytoplasm transporter	1204.35	1225.08	1209.59	377.478	322.278	360.264	1.77545e-14	-2.44435	7.06649e-19	0.183729	13.7507
MSTRG.14008	LOC100164395	slit homolog 1 protein-like	1368.59	1351.33	1044.13	521.096	310.312	262.368	7.4322e-05	-2.44405	2.95809e-09	0.183767	4.12888
MSTRG.12063	LOC100575970	homeobox protein Nkx-2.6-like	709.092	611.241	700.325	216.865	193.061	180.571	4.53096e-08	-2.44045	1.80337e-12	0.184226	7.34381
MSTRG.16999	LOC100572769	tubulin glycylase 3A-like	2840.03	2613.83	3066.93	744.947	791.322	954.198	1.06322e-18	-2.43866	4.2317e-23	0.184455	17.9734
MSTRG.5558	LOC100571586	uncharacterized LOC100571586	3815.71	3686.81	3722.58	1394.44	939.031	944.467	1.59087e-15	-2.43855	6.33183e-20	0.184469	14.7984
MSTRG.7440	LOC100158703	uncharacterized LOC100158703	1253.92	1297.43	1327.09	472.096	392.977	268.508	9.49142e-08	-2.43624	3.77768e-12	0.184765	7.02267
MSTRG.21113	LOC100571615	putative ankyrin repeat protein R840-like	142.392	168.089	138.772	38.3317	48.7489	44.491	0.00286915	-2.43429	1.14195e-07	0.185014	2.54225
MSTRG.12094	LOC100168447	homeobox protein abdominal-A homolog	424.92	310.933	269.684	116.58	105.24	73.498	0.0070136	-2.42782	2.79148e-07	0.185847	2.15406
MSTRG.18437	#N/A	#N/A	717.232	681.577	876.926	247.4	253.956	168.847	1.38269e-05	-2.42757	5.50325e-10	0.185878	4.85927
MSTRG.5013	LOC100159668	uncharacterized LOC100159668	477.581	812.872	427.147	134.483	172.326	194.368	0.00570631	-2.42624	2.27117e-07	0.18605	2.24364
MSTRG.18950	LOC100158662	sodium-coupled monocarboxylate transporter 2-like	3821.82	5007.25	5033.73	1080.58	1595.68	1391.92	9.73786e-14	-2.42613	3.87577e-18	0.186063	13.0115
MSTRG.6793	LOC100162250	3-ketosteroid-9-alpha-hydroxylase oxygenase subunit-like	429.699	429.776	551.354	110.468	142.148	164.616	0.000327735	-2.41659	1.30442e-08	0.187298	3.48448
MSTRG.5682	LOC100161626	uncharacterized LOC100161626	1391.57	1608.7	1787.06	679.902	430.201	304.632	0.000430922	-2.41648	1.71511e-08	0.187313	3.3656
MSTRG.8464	LOC100164565	ATP-binding cassette sub-family G member 1-like, active transporters; abc transporter; similar to CG17646 CG17646-PA	658.462	510.94	583.668	126.133	163.177	227.97	0.000967359	-2.41399	3.85018e-08	0.187636	3.01441
MSTRG.14302	LOC103310490	#N/A	527.992	636.969	499.381	220.869	138.849	131.77	0.000378186	-2.41149	1.50522e-08	0.187962	3.4223
MSTRG.20550	LOC100160700	phosphoenolpyruvate carboxykinase [GTP]-like	4868.81	4282.4	4858.65	1447.21	1299.27	1403.3	7.29343e-28	-2.41043	2.90286e-32	0.188099	27.1371
MSTRG.2385	LOC100169150	uncharacterized LOC100169150	3907.19	3864.13	4796.76	1483.25	1160.2	1085.67	9.95338e-16	-2.40998	3.96155e-20	0.188158	15.002
MSTRG.25487	#N/A	#N/A	572.013	488.111	510.863	184.415	127.421	154.814	1.5765e-05	-2.40772	6.27461e-10	0.188453	4.80231
MSTRG.10711	Catb-2744	cathepsin B-2744 (EC:3.4.22.1)	1759.48	2001.29	4037	830.807	795.948	706.182	0.00434163	-2.40682	1.72801e-07	0.188571	2.36235
MSTRG.2914	LOC100160135	uncharacterized LOC100160135	5723.01	5724.94	6428.15	2164.55	1524.46	1624.04	2.08262e-18	-2.40452	8.28904e-23	0.188873	17.6814
MSTRG.574	LOC100159646	steroid dehydrogenase-like	2791.09	2803.9	2567.49	739.594	802.766	880.915	5.69274e-25	-2.39937	2.26577e-29	0.189547	24.2447
MSTRG.19105	LOC100575278	uncharacterized LOC100575278	903.271	759.515	1186.26	306.613	315.157	231.525	2.78947e-05	-2.39691	1.11024e-09	0.189871	4.55448
MSTRG.14240	LOC100160095	Asparaginase	2675.48	2629.98	2963.79	950.164	713.319	805.948	3.44622e-18	-2.3941	1.37163e-22	0.190241	17.4627
MSTRG.19348	LOC100161792	elongation of very long chain fatty acids protein AAEL008004-like	3307.03	3606.86	3906.1	1155.03	1066.03	1008.87	4.46085e-24	-2.39377	1.77546e-28	0.190285	23.3506
MSTRG.17732	LOC100166139	tyrosine-protein kinase Abl-like	1754.29	1892.92	2107.12	635.848	636.217	450.283	1.3729e-11	-2.38891	5.46429e-16	0.190927	10.8624
MSTRG.8058	LOC100160920	fatty acid synthase-like	5801.68	5502.4	5453.34	1703.04	1877.69	1427.98	8.27006e-26	-2.38775	3.29156e-30	0.19108	25.0825
MSTRG.23609	#N/A	#N/A	607.72	398.736	728.751	181.903	178.753	162.695	0.00301677	-2.38508	1.20071e-07	0.191434	2.52046
MSTRG.24100	LOC103308325	#N/A	689.244	711.791	786.308	194.587	205.354	256.248	2.48305e-07	-2.38241	9.88278e-12	0.191788	6.60501
MSTRG.8038	LOC100167781	uncharacterized LOC100167781	3254.52	2861.24	2581.16	572.523	1121.88	910.903	3.24427e-07	-2.37895	1.29125e-11	0.19225	6.48888
MSTRG.19657	#N/A	#N/A	1364.36	1097.88	1839.2	437.414	463.831	399.069	1.28122e-06	-2.37747	5.09936e-11	0.192447	5.89238
MSTRG.20957	LOC100163283	protein krueppel-like	1668.52	1590.38	1746.23	566.006	466.254	475.035	3.11961e-15	-2.37734	1.24163e-19	0.192463	14.5059
MSTRG.11266	LOC100166015	defense protein l(2)34Fc-like	1065.22	1312.36	822.206	342.518	312.326	302.004	1.7719e-08	-2.37689	7.05236e-13	0.192524	7.75156
MSTRG.13764	LOC100169277	hairy E protein-like	1728.12	1491.13	2130.69	587.151	478.416	551.798	3.75137e-10	-2.37343	1.49308e-14	0.192986	9.42581
MSTRG.8493	LOC100159190	uncharacterized LOC100159190	2085.8	2366.11	2394.2	730.387	657.098	681.694	6.42478e-21	-2.36746	2.55713e-25	0.193787	20.1921
MSTRG.9063	LOC100160886	UDP-glucuronosyltransferase 2B15-like	486.283	685.527	477.322	184.765	150.983	160.869	2.50748e-05	-2.36696	9.98001e-10	0.193854	4.60076
MSTRG.20093	LOC100167194	anaphase-promoting complex subunit 4-like	1589.73	1678.98	2025.74	555.446	539.091	509.496	9.09098e-14	-2.36586	3.6183e-18	0.194002	13.0414
MSTRG.20052	LOC100169166	integrin alpha-PS2-like	2489.17	2438.62	2285.57	820.388	730.279	630.33	5.32563e-20	-2.36314	2.11965e-24	0.194367	19.2736
MSTRG.6535	LOC100167868	uncharacterized LOC100167868	7326.44	8187.77	8829.51	2797.36	2411.09	2169.29	1.02271e-22	-2.36237	4.07049e-27	0.194472	21.9902
MSTRG.20758	LOC100165521	uncharacterized LOC100165521	1897.78	1973.99	2349.8	708.219	609.515	573.926	2.02671e-14	-2.35889	8.0665e-19	0.194941	13.6932
MSTRG.19659	#N/A	#N/A	346.172	456.647	430.243	135.288	129.522	109.644	6.86371e-05	-2.35735	2.73182e-09	0.195149	4.16344
MSTRG.6642	LOC100162675	MFS-type transporter C6orf192-like	1145.15	1291.98	1055.12	382.76	293.94	381.44	1.25089e-10	-2.35565	4.97868e-15	0.195379	9.90278
MSTRG.23016	#N/A	#N/A	970.651	844.799	1058.19	393.336	249.063	234.145	5.71099e-05	-2.35253	2.27303e-09	0.195802	4.24329
MSTRG.8307	LOC100162489	uncharacterized LOC100162489	1029.46	742.23	824.22	373.027	227.404	191.686	0.00290749	-2.35024	1.15721e-07	0.196113	2.53648
MSTRG.15835	LOC100163119	uncharacterized LOC100163119	61535.6	53957.1	56759.3	17816.7	15851.9	18813.5	2.12315e-32	-2.349	8.45033e-37	0.196282	31.673
MSTRG.3137	LOC100163393	phenoloxidase subunit A3-like	3933.45	3573.4	3604.88	1028.95	1159.41	1195.99	1.16191e-25	-2.34848	4.6245e-30	0.196352	24.9348
MSTRG.23384	#N/A	#N/A	316.686	300.039	288.327	115.277	79.2196	81.5159	0.000638851	-2.34802	2.54269e-08	0.196416	3.1946
MSTRG.13203	LOC100160384	proton-coupled amino acid transporter 4-like	5679.34	6296.72	8364.59	2298.48	1870.11	2087.24	1.38538e-13	-2.33733	5.51394e-18	0.197876	12.8584
MSTRG.25370	#N/A	#N/A	309.898	241.848	278.879	83.113	83.0501	88.5919	0.000445941	-2.33506	1.77489e-08	0.198187	3.35072
MSTRG.12611	LOC100164941	uncharacterized LOC100164941	5348.04	6006.99	6627.16	2142.21	1787.58	1601.01	8.39413e-19	-2.33284	3.34095e-23	0.198493	18.076
MSTRG.6015	LOC100168081	ribosomal protein L35Ae-like	63402.1	58059.6	102107	25116.6	21729.4	22323.4	4.9212e-08	-2.33195	1.95869e-12	0.198615	7.30793
MSTRG.8065	LOC100167532	40S ribosomal protein S2-like	103723	96133.5	154966	39933.1	34909.5	34853.2	1.30189e-10	-2.33109	5.18164e-15	0.198734	9.88543
MSTRG.21995	LOC100166005	NFX1-type zinc finger-containing protein 1-like	185.887	179.021	150.583	47.3078	59.3001	51.4763	0.00399311	-2.32658	1.5893e-07	0.199356	2.39869
MSTRG.5978	LOC100169571	lactase-phlorizin hydrolase-like	8925.68	8294.67	5451.76	2627.88	1631.28	2689.06	1.69814e-07	-2.32653	6.75875e-12	0.199363	6.77003
MSTRG.23010	#N/A	#N/A	298.587	314.109	357.07	121.402	89.9994	90.3656	0.000902988	-2.30903	3.59398e-08	0.201795	3.04432
MSTRG.2520	LOC100571316	possible pseudogene or miscRNA, No KEGG entry	1808.18	2196.47	1984.89	659.258	600.096	601.2	4.89276e-18	-2.30739	1.94737e-22	0.202026	17.3104
MSTRG.23216	#N/A	#N/A	284.968	289.367	416.071	111.464	90.0077	108.084	0.00745378	-2.30676	2.96668e-07	0.202114	2.12762
MSTRG.7499	LOC100163876	xylulose kinase-like	2128.04	2593.23	3124.21	782.932	655.089	1012.47	3.41304e-08	-2.30312	1.35842e-12	0.202624	7.46686
MSTRG.10816	LOC100162365	uncharacterized LOC100162365	5692.76	5703.46	7464.96	2363.96	1895.47	1651.3	1.88638e-12	-2.29808	7.50798e-17	0.203334	11.7244
MSTRG.9739	LOC100169536	centaurin-gamma-1A-like	1201.65	1231.63	1551.29	534.398	438.907	275.557	0.00027363	-2.29661	1.08908e-08	0.203541	3.56284
MSTRG.7872	LOC100159277	delta-1-pyrroline-5-carboxylate synthase-like	8129.41	11571.2	10380	3419.75	2754.47	3217.62	6.77754e-18	-2.29568	2.69753e-22	0.203672	17.1689
MSTRG.17940	LOC100161188	platelet glycoprotein V-like	6437.19	6518.14	5896.52	2243.76	1831.82	1814.53	3.04451e-27	-2.29409	1.21174e-31	0.203897	26.5165
MSTRG.8919	Cpap3-d1	cuticular protein analogous to peritrophins 3-D1	477.469	645.783	652.097	184.628	203.759	168.77	3.9893e-05	-2.2898	1.58778e-09	0.204504	4.3991
MSTRG.7002	LOC100168810	protein Wnt-2-like	1368.42	1171.11	1435.97	402.414	445.444	402.002	5.05676e-11	-2.28759	2.01264e-15	0.204817	10.2961
MSTRG.11466	LOC100158954	lysosomal alpha-mannosidase-like	3421.42	4433.27	2698.42	864.079	1167.72	1263.02	3.10701e-09	-2.28369	1.23662e-13	0.205372	8.50766
MSTRG.23187	LOC100159560	Cystathionase-like	7239.75	7275.65	5856.6	2323.42	1983.28	2082.79	5.37798e-27	-2.28315	2.14049e-31	0.205448	26.2694
MSTRG.2439	LOC100158786	coagulation factor IX-like	447.182	402.76	388.165	114.085	146.513	129.119	6.13526e-05	-2.28296	2.44189e-09	0.205476	4.21217
MSTRG.13893	LOC100161882	uncharacterized LOC100161882	2699.72	2463.49	2453.68	926.337	741.191	731.054	2.9205e-18	-2.28053	1.16239e-22	0.205822	17.5345
MSTRG.21223	LOC100162819	6-phosphofructo-2-kinase/fructose-2,6-biphosphatase-like	4585.32	4385.02	5158.37	1574.24	1480.81	1404.25	3.11488e-23	-2.27926	1.23975e-27	0.206003	22.5066
MSTRG.21122	LOC100573020	vitellogenin-6-like	5002.11	5209.41	4482.33	1607.54	1443.2	1579.84	2.05753e-30	-2.27478	8.18918e-35	0.206645	29.6867
MSTRG.2084	LOC100164179	Asparaginase	12205.5	11591.9	11443.4	4081.9	3394.91	3648.27	5.66352e-32	-2.27426	2.25414e-36	0.206718	31.2469
MSTRG.12288	LOC100159100	protein apterous-like	1237.16	1283.5	1566.45	442.243	458.742	394.745	4.32989e-10	-2.27148	1.72334e-14	0.207117	9.36352
MSTRG.15713	#N/A	#N/A	614.758	604.911	853.822	273.359	177.928	208.639	0.00140083	-2.26932	5.57546e-08	0.207427	2.85361
MSTRG.10504	LOC100166971	Phenylalanine 4-monooxygenase; PAH	10356.2	12235.7	8641.45	3595.99	3523.52	2749.03	6.35343e-18	-2.26454	2.52873e-22	0.208115	17.197
MSTRG.14080	LOC100165996	neutral ceramidase-like	202.19	262.196	275.724	83.8022	86.0709	66.4488	0.00952836	-2.26284	3.79238e-07	0.208362	2.02098
MSTRG.21225	LOC100165267	uncharacterized LOC100165267	1276.04	1337.51	1502.34	508.322	403.516	400.903	3.25364e-10	-2.25735	1.29498e-14	0.209156	9.48763
MSTRG.20713	LOC100160111	probable maltase L-like	5918.45	9027.48	11253.9	2275.49	3762.17	2328.96	0.00058424	-2.25718	2.32533e-08	0.20918	3.23341
MSTRG.13658	LOC100166120	tRNA (adenine-N(1)-)-methyltransferase catalytic subunit TRMT61A-like	1768.92	1631.57	2287.88	680.825	589.587	549.201	2.33929e-09	-2.25662	9.31062e-14	0.209262	8.63092
MSTRG.13843	LOC100169224	uncharacterized LOC100169224	5408.16	4949.17	6496.83	2007.22	1747.93	1632.84	1.73939e-16	-2.25578	6.92296e-21	0.209384	15.7596
MSTRG.9141	LOC100158922	ankyrin repeat and fibronectin type-III domain-containing protein 1-like	1765.27	1711.46	2238.32	710.658	619.596	498.029	7.62356e-09	-2.25529	3.03425e-13	0.209455	8.11784
MSTRG.8725	LOC100164052	prestin-like, active transporters; similar to sulfate transporter	1112.04	976.814	1580.16	353.153	454.728	368.202	6.24365e-05	-2.2548	2.48504e-09	0.209526	4.20456
MSTRG.8327	LOC100166785	uncharacterized LOC100166785	104200	104482	149839	40290.6	36365.4	38161.5	1.04142e-13	-2.25459	4.14496e-18	0.209557	12.9824
MSTRG.8500	LOC100167539	uncharacterized LOC100167539	4958.46	5377.96	4744.93	1959.39	1518.32	1336.29	6.03713e-17	-2.2498	2.40284e-21	0.210253	16.2192
MSTRG.6843	LOC100164266	glycogenin-1-like	7656.55	8311.93	5912.97	2399.3	1931.22	2634.34	4.12407e-16	-2.24881	1.64142e-20	0.210397	15.3847
MSTRG.13878	LOC100575170	protein gooseberry-neuro-like	325.012	281.724	329.647	110.459	79.5288	110.959	0.00255646	-2.24815	1.0175e-07	0.210493	2.59236
MSTRG.23555	#N/A	#N/A	375.986	400.409	321.264	105.985	141.533	102.716	0.000742929	-2.24717	2.95693e-08	0.210636	3.12905
MSTRG.18470	LOC100168636	basement membrane-specific heparan sulfate proteoglycan core protein-like	9235.3	10521	12244.3	4063.79	3211.34	2999.67	7.01175e-15	-2.24487	2.79075e-19	0.210973	14.1542
MSTRG.2641	LOC100162071	protein Wnt-1-like	572.396	569.134	612.098	208.65	179.56	175.089	3.42577e-06	-2.24245	1.36349e-10	0.211327	5.46524
MSTRG.12274	LOC100161813	uncharacterized LOC100161813	1679.9	1658.51	2053.97	691.511	558.207	488.287	2.53885e-09	-2.23866	1.01049e-13	0.211882	8.59536
MSTRG.11285	LOC115033560	#N/A	679.423	688.991	633.956	287.232	174.919	181.262	0.000402717	-2.23795	1.60286e-08	0.211987	3.395
MSTRG.13731	LOC100162798	high affinity cationic amino acid transporter 1-like	3009.34	3151.85	2519.22	925.592	740.737	1114.76	1.14297e-12	-2.23784	4.54915e-17	0.212004	11.942
MSTRG.14702	LOC100574331	putative ankyrin repeat protein R873-like	725.238	675.099	805.54	235.933	246.246	228.952	3.97222e-07	-2.23405	1.58098e-11	0.212562	6.40097
MSTRG.14079	LOC100168026	heat shock protein 70 B2-like	994.456	990.506	678.457	299.233	251.111	303.784	2.50297e-06	-2.23379	9.96209e-11	0.212599	5.60154
MSTRG.6901	LOC100164792	uncharacterized LOC100164792	1194.38	1399.22	2014.33	532.385	454.656	506.763	1.2286e-05	-2.2315	4.88994e-10	0.212937	4.91059
MSTRG.10779	LOC100160365	probable serine/threonine-protein kinase nek3	721.477	773.498	1053.4	332.155	221.348	272.076	0.000472258	-2.2314	1.87963e-08	0.212952	3.32582
MSTRG.7631	LOC100166780	uncharacterized LOC100166780	2124.53	1835.75	1714.03	766.952	492.856	574.678	5.62187e-09	-2.22415	2.23756e-13	0.214025	8.25012
MSTRG.6722	LOC100161809	uncharacterized LOC100161809	964.525	1056.54	1224.32	450.669	341.559	261.431	7.06985e-05	-2.22281	2.81387e-09	0.214224	4.15059
MSTRG.16953	LOC100160011	uncharacterized LOC100160011	3721.79	3510.74	4216.17	1341.51	1212.51	1178.46	4.04805e-19	-2.21247	1.61116e-23	0.215764	18.3928
MSTRG.135	LOC100168167	uncharacterized LOC100168167	1874.41	1470.72	2494.6	666.053	493.657	757.438	0.000158011	-2.20666	6.28901e-09	0.216636	3.80131
MSTRG.6646	LOC100159461	MFS-type transporter C6orf192 homolog	3977.29	3919.24	4094.87	1419.92	1104.94	1393.62	2.61704e-19	-2.20413	1.04161e-23	0.217016	18.5822
MSTRG.14204	LOC100166548	coatomer subunit alpha-like	8976.04	9369.07	12243.7	3821.66	3189.22	3036.76	1.17035e-13	-2.19981	4.65811e-18	0.217666	12.9317
MSTRG.1694	LOC100167365	CG31997-like	2144.91	1923.3	2067.1	715.381	666.626	629.414	9.99455e-17	-2.19751	3.97793e-21	0.218014	16.0002
MSTRG.21394	LOC100166618	fatty acid synthase-like	2149.57	2364.97	1350.45	785.967	510.457	614.398	1.87446e-05	-2.1968	7.46053e-10	0.21812	4.72712
MSTRG.13136	LOC100162298	UNC93-like protein-like	301.383	279.554	234.036	72.2546	102.805	92.0299	0.00797351	-2.19564	3.17354e-07	0.218297	2.09835
MSTRG.15834	LOC100165203	alpha,alpha-trehalose-phosphate synthase [UDP-forming] A-like	8002.64	9843.32	9683.45	3174.52	2459.14	3398.55	4.84514e-16	-2.19455	1.92841e-20	0.218461	15.3147
MSTRG.19204	LOC100574486	possible pseudogene or miscRNA, No KEGG entry	2643.85	2533.66	1525.01	746.422	528.804	915.346	0.000201326	-2.19054	8.01298e-09	0.219069	3.6961
MSTRG.16120	LOC100575433	BCL-6 corepressor-like	1021.74	1148.44	1428.16	491.598	345.309	351.465	1.62043e-05	-2.18869	6.44949e-10	0.21935	4.79037
MSTRG.18297	LOC100568638	poly [ADP-ribose] polymerase 12-like	453.208	473.089	633.933	195.457	173.256	147.627	0.00250604	-2.18829	9.97431e-08	0.219411	2.60101
MSTRG.85	LOC100168221	possible pseudogene or miscRNA, No KEGG entry	460.399	732.1	620.443	196.786	190.726	208.508	0.000400809	-2.18401	1.59526e-08	0.220064	3.39706
MSTRG.13895	LOC100162550	enhancer of split mgamma protein-like	3936.71	3389.77	3931.09	1468.87	1115.85	1143.95	6.57056e-15	-2.17901	2.61515e-19	0.220827	14.1824
MSTRG.24162	LOC100165356	uncharacterized LOC100165356	1609.2	1339.86	1933.68	568.301	533.674	520.954	2.02645e-08	-2.17729	8.06549e-13	0.22109	7.69326
MSTRG.21640	LOC100159913	uncharacterized protein LOC100159913	621.793	786.306	953.728	258.754	256.948	270.482	9.11538e-05	-2.17059	3.62801e-09	0.222119	4.04023
MSTRG.19617	LOC100165054	lipoamide acyltransferase component of branched-chain alpha-keto acid dehydrogenase complex, mitochondrial-like	9745.76	11063.4	10604.6	3434.15	2855.45	4141.58	1.27651e-16	-2.16821	5.08064e-21	0.222487	15.894
MSTRG.13872	LOC100163852	protein gooseberry-like	1037.96	984.146	1139.62	419.967	336.504	296.866	5.58686e-07	-2.16805	2.22362e-11	0.222511	6.25283
MSTRG.17673	LOC100570959	uncharacterized LOC100570959	5146.92	5226.84	6236.2	2076.3	1699.67	1759.04	1.28548e-17	-2.16735	5.11633e-22	0.22262	16.8909
MSTRG.18966	LOC100573316	uncharacterized LOC100573316	658.639	590.926	765.046	279.702	164.681	228.824	0.00363154	-2.16552	1.44539e-07	0.222902	2.43991
MSTRG.16651	LOC100162715	pancreatic lipase-related protein 2-like	897.179	1003.37	647.443	272.723	226.651	344.453	0.000366276	-2.16501	1.45782e-08	0.222981	3.43619
MSTRG.17665	LOC100168264	uncharacterized LOC100168264	864.428	1271.38	1100.94	386.636	249.569	440.636	0.00114558	-2.16374	4.55952e-08	0.223177	2.94097
MSTRG.8296	LOC100164587	4-aminobutyrate aminotransferase, mitochondrial-like	7235.44	8477.49	10530.6	3078.17	2811.18	2880.55	4.18198e-14	-2.16263	1.66447e-18	0.223348	13.3786
MSTRG.11825	LOC100158899	uncharacterized LOC100158899	4996.97	4627.1	5698.51	2034.83	1509.27	1576.43	5.66179e-14	-2.16261	2.25345e-18	0.223352	13.247
MSTRG.7487	LOC100160633	glutamate--cysteine ligase catalytic subunit-like	2561.54	2246.52	3123.95	1000.22	802.072	852.707	1.43609e-10	-2.16166	5.71578e-15	0.2235	9.84282
MSTRG.19251	LOC100160702	solute carrier family 2, facilitated glucose transporter member 1-like	23598.5	21901.6	30662.9	9389.88	8464.5	7703.12	1.96675e-13	-2.15654	7.82786e-18	0.224294	12.7063
MSTRG.17908	LOC100162480	60S ribosomal protein L13a-like	83965.3	79913.8	122098	34459.1	30129.3	31570.6	2.28357e-10	-2.15481	9.08882e-15	0.224563	9.64139
MSTRG.10975	LOC100570719	uncharacterized LOC100570719	1267.85	1155.01	1573.49	614.21	422.763	309.101	0.00488924	-2.1511	1.94597e-07	0.22514	2.31076
MSTRG.8809	LOC100163673	glucose dehydrogenase [acceptor]-like	605.134	680.358	547.465	225.656	231.323	156.401	0.000317656	-2.15028	1.2643e-08	0.225269	3.49804
MSTRG.8136	Mf	myofilin	2391.79	1948.2	1881.45	517.144	1036.18	528.789	0.00522577	-2.14991	2.07991e-07	0.225327	2.28185
MSTRG.21918	LOC100161021	facilitated trehalose transporter Tret1-like, Sugar transporters; similar to AGAP007484-PA	3191.4	3316.04	2466.93	1039.71	985.014	979.804	1.1109e-17	-2.14527	4.42149e-22	0.226052	16.9543
MSTRG.7903	Hibadh	#N/A	1218.26	1462.74	1225.83	477.69	362.809	469.699	5.3217e-09	-2.14511	2.11809e-13	0.226077	8.27395
MSTRG.13210	LOC100169268	protein furry-like	2415.31	2615.94	3058.54	1014.05	949.946	760.943	8.15228e-12	-2.14505	3.24469e-16	0.226088	11.0887
MSTRG.2494	LOC100166280	myosin-VIIa-like	1166.35	1355.74	1214.48	502.394	356.872	396.536	2.68951e-08	-2.14383	1.07045e-12	0.226278	7.57033
MSTRG.9060	LOC100160202	UDP-glucuronosyltransferase 2B13-like	581.247	820.725	652.053	211.981	245.115	233.225	3.20639e-05	-2.13874	1.27618e-09	0.227078	4.49398
MSTRG.9205	LOC103310598	#N/A	761.553	943.007	972.482	319.108	317.055	267.622	1.31002e-06	-2.13631	5.214e-11	0.227461	5.88272
MSTRG.8052	LOC100163154	fatty acid synthase-like	11952.3	15537.3	14212.4	4598.96	3919.78	5565.92	2.35671e-14	-2.13193	9.37996e-19	0.228153	13.6277
MSTRG.15832	LOC100169280	actin	26350.3	29811.9	27658.4	8079.87	13084.7	7172.69	3.58076e-07	-2.12925	1.42518e-11	0.228577	6.44602
MSTRG.16926	LOC100571674	uncharacterized LOC100571674	451.901	401.75	430.969	145.244	139.541	150.304	0.000145069	-2.12906	5.77387e-09	0.228607	3.83843
MSTRG.8597	LOC100165751	muscle LIM protein Mlp84B-like	3746.74	3379.86	1963.15	1010.63	946.576	1104.16	2.23507e-06	-2.12674	8.89581e-11	0.228975	5.65071
MSTRG.6300	LOC100165614	uncharacterized LOC100165614	2279.65	2591.02	2599.63	1051.93	930.729	554.375	1.1812e-05	-2.12458	4.7013e-10	0.229318	4.92768
MSTRG.2134	LOC100168386	zinc metalloproteinase nas-14-like	663.138	772.108	519.143	209.745	211.442	240.319	7.76529e-05	-2.12349	3.09066e-09	0.229491	4.10984
MSTRG.2022	LOC100573761	uncharacterized LOC100573761	6690.88	8989.53	8484.9	3255.17	2533.45	2414.6	2.07117e-13	-2.12342	8.24348e-18	0.229503	12.6838
MSTRG.7719	LOC100166532	uncharacterized LOC100166532	3112.89	2920.79	3637.53	1282.72	978.056	1033.61	2.42058e-12	-2.12256	9.63414e-17	0.229639	11.6161
MSTRG.5265	#N/A	#N/A	1421.76	1120.45	1393.52	556.355	388.26	397.403	4.70506e-06	-2.12089	1.87266e-10	0.229905	5.32743
MSTRG.2387	LOC100165068	zinc transporter 7-like	3805.78	3717.2	4393.78	1429.22	1374.47	1256	4.69579e-18	-2.12082	1.86897e-22	0.229917	17.3283
MSTRG.22107	LOC100168603	RNA-binding protein cabeza	29802.7	29294.4	38946.7	12930.5	10893.8	9643.66	2.6077e-12	-2.12011	1.03789e-16	0.23003	11.5837
MSTRG.21346	LOC100164228	uncharacterized LOC100164228	888.65	800.511	987.812	279.077	338.069	297.765	1.96611e-06	-2.1133	7.82532e-11	0.231118	5.70639
MSTRG.16476	LOC100164109	neurogenic locus Notch protein-like	6877.14	7010.92	7214.08	2597.33	2341.04	2266.52	8.61529e-27	-2.11276	3.42897e-31	0.231204	26.0647
MSTRG.18954	LOC107882403	#N/A	1619.67	1647.53	1190.14	616.793	372.771	527.974	2.07914e-05	-2.11165	8.27517e-10	0.231382	4.68212
MSTRG.19000	LOC100159472	osiris 6-like	7680.86	9644.55	10449.9	3537.41	3272.46	2693.42	2.21471e-13	-2.11045	8.81475e-18	0.231575	12.6547
MSTRG.2320	LOC100158979	uncharacterized LOC100158979	4078.34	4072.74	5393.71	1713.49	1418.97	1513.78	2.66543e-12	-2.10996	1.06087e-16	0.231654	11.5742
MSTRG.15522	LOC100568554	tRNA-specific adenosine deaminase 1-like	751	680.649	975.286	275.908	290.378	260.613	0.000126271	-2.10923	5.02569e-09	0.23177	3.8987
MSTRG.16626	LOC100167082	solute carrier family 22 member 5-like, Organic acid transporter; similar to organic cation transporter, partial	2690.22	1799.25	2666.47	763.268	756.205	937.494	2.79115e-07	-2.10789	1.11091e-11	0.231986	6.55422
MSTRG.9901	LOC100161162	carbonic anhydrase 13-like	2244.6	2697.02	3260.14	983.372	890.77	940.043	8.45583e-11	-2.10723	3.3655e-15	0.232092	10.0728
MSTRG.91	LOC100162552	filamin-A-like	9301.34	9148.61	10841.3	3555.85	3329.25	3162.96	2.56059e-21	-2.10619	1.01914e-25	0.23226	20.5917
MSTRG.8707	LOC100167427	uncharacterized LOC100167427	702.618	948.561	1286.17	369.868	323.066	318.79	0.00395388	-2.10463	1.57368e-07	0.232511	2.40298
MSTRG.7939	LOC100161583	aminomethyltransferase, mitochondrial	4521.58	4758.74	3476.31	1561.22	1430.98	1367.15	1.38671e-17	-2.10251	5.51925e-22	0.232853	16.858
MSTRG.4812	LOC100168178	amino acid transporter; cationic AA transmembrane	2101.16	1849.66	1248.74	619.776	594.004	564.14	3.46846e-07	-2.10004	1.38048e-11	0.233251	6.45986
MSTRG.18375	LOC100573273	uncharacterized LOC100573273	489.796	546.437	529.929	217.421	150.181	171.453	0.000838944	-2.09798	3.33908e-08	0.233584	3.07627
MSTRG.21564	LOC100168554	uncharacterized LOC100168554	274.239	304.311	316.907	111.878	109.653	86.9502	0.00632587	-2.09432	2.51776e-07	0.234178	2.19888
MSTRG.11345	LOC100166262	osiris 20-like	3586.16	2691.7	2786.31	1166.58	901.565	1054.83	1.0314e-11	-2.0928	4.10508e-16	0.234426	10.9866
MSTRG.21974	LOC100163247	lipase 3-like	3751.25	2810.75	4369.24	1366.78	1010.07	1416.58	1.43334e-06	-2.08846	5.70482e-11	0.235131	5.84365
MSTRG.16574	#N/A	#N/A	591.163	652.45	884.085	231.973	292.936	213.87	0.00535679	-2.08484	2.13205e-07	0.235722	2.2711
MSTRG.13739	LOC100168195	venom serine carboxypeptidase-like	2787.3	2878.48	2794.32	927.377	760.019	1239.4	4.29411e-09	-2.08296	1.7091e-13	0.236029	8.36713
MSTRG.11195	LOC100162562	nuclear hormone receptor FTZ-F1-like	1860.59	2617.7	1612.99	966.345	642.243	493.512	0.0038035	-2.08012	1.51383e-07	0.236495	2.41982
MSTRG.21200	LOC100167378	paired box protein Pax-6-like	1069.17	1035.06	1500.53	457.74	400.722	398.378	2.54949e-05	-2.07931	1.01472e-09	0.236628	4.59355
MSTRG.15467	LOC103310346	#N/A	488.572	584.185	519.902	174.102	192.401	187.376	8.04512e-05	-2.07043	3.20204e-09	0.238089	4.09447
MSTRG.17413	LOC100165997	cyclase-like	494.458	421.28	495.173	164.112	141.724	187.333	0.00192521	-2.07019	7.66254e-08	0.238129	2.71552
MSTRG.7497	LOC100165263	toll-like receptor 13-like	742.87	579.109	796.334	291.18	230.619	220.885	0.0010072	-2.06826	4.00874e-08	0.238446	2.99689
MSTRG.2415	LOC100159138	amino acid transporter	11926.7	12806.4	8066.8	4290.09	4027.06	3057.91	2.204e-09	-2.0681	8.77213e-14	0.238474	8.65679
MSTRG.11397	LOC100164230	RNA-binding protein MEX3B-like	2951.73	3287.98	2922.52	1274.55	976.637	942.748	5.00899e-14	-2.06639	1.99363e-18	0.238755	13.3002
MSTRG.3327	LOC100160034	phenoloxidase subunit A3-like	9008.92	7509.31	8842	3098.02	2584.75	3188.6	4.03528e-17	-2.06454	1.60608e-21	0.239062	16.3941
MSTRG.20716	LOC100168291	zinc finger protein ZIC 3-like	1713.1	1797.88	2032.39	667.1	629.396	647.203	1.63289e-12	-2.06067	6.49906e-17	0.239705	11.787
MSTRG.24226	#N/A	#N/A	396.803	415.694	438.022	157.002	136.718	145.123	0.000532484	-2.05975	2.11934e-08	0.239857	3.27369
MSTRG.21192	LOC100574642	uncharacterized LOC100574642	533.272	736.45	573.966	256.898	187.681	201.452	0.00117092	-2.05694	4.66036e-08	0.240326	2.93147
MSTRG.18302	LOC100166082	spermidine synthase-like	30632.1	36039.7	30493.9	10996.2	9449.72	13553.7	1.90327e-15	-2.05583	7.57521e-20	0.24051	14.7205
MSTRG.6157	LOC100168855	low-density lipoprotein receptor-related protein 2-like	5101.42	5978.82	5372.22	2225.06	1871.82	1673.4	1.45619e-17	-2.05376	5.7958e-22	0.240856	16.8368
MSTRG.9138	LOC100161964	uncharacterized LOC100161964	2233.91	2369.51	2280.15	855.196	727.114	834.21	1.1302e-16	-2.05237	4.49831e-21	0.241088	15.9468
MSTRG.9842	LOC100571300	uncharacterized LOC100571300	3041.95	3975.14	3062.72	1453.85	1073.08	1008.06	5.93444e-10	-2.05061	2.36197e-14	0.241383	9.22662
MSTRG.23719	#N/A	#N/A	329.313	330.315	325.883	125.172	113.851	108.057	0.0015178	-2.04732	6.04101e-08	0.241932	2.81878
MSTRG.11073	LOC100165053	membrane-bound alkaline phosphatase-like	2753.52	2744.6	3069.84	832.999	844.082	1343.42	1.49904e-06	-2.04668	5.96634e-11	0.242041	5.82419
MSTRG.8313	LOC100165106	putative inorganic phosphate cotransporter-like	641.878	1082.24	979.758	315.308	365.335	271.154	0.003724	-2.04588	1.48219e-07	0.242175	2.42899
MSTRG.5227	ACYPI38370	#N/A	2758.21	2559.75	2109.47	1017.48	560.178	1034.46	0.000136965	-2.04542	5.45133e-09	0.242252	3.86339
MSTRG.11477	LOC100163910	uncharacterized LOC100163910	5273.78	5363.01	6013.67	2249.35	1845.77	1793.43	7.07006e-17	-2.04173	2.81395e-21	0.242873	16.1506
MSTRG.11362	LOC100166763	15-hydroxyprostaglandin dehydrogenase [NAD+]-like	698.503	669.601	490.091	260.663	170.041	226.173	0.00661777	-2.03411	2.63394e-07	0.244159	2.17929
MSTRG.9604	LOC100575199	sodium-independent sulfate anion transporter-like	1492.96	1377.54	1382.44	580.381	471.583	455.6	2.0766e-09	-2.03407	8.26507e-14	0.244165	8.68265
MSTRG.6246	LOC100159795	protein phosphatase 1 regulatory subunit 3B-like	4021.66	6140.54	3061.45	1707.12	1198.35	1744.93	0.000363025	-2.03334	1.44487e-08	0.244289	3.44006
MSTRG.18152	LOC100160545	prostaglandin E2 receptor EP3 subtype-like	320.738	300.149	299.477	93.5638	108.183	125.623	0.00955598	-2.03126	3.80338e-07	0.244641	2.01972
MSTRG.16723	LOC100165294	beta-centractin-like	2467.8	2615.99	3268.06	1197.2	885.624	896.008	2.12269e-08	-2.02825	8.44852e-13	0.245153	7.67311
MSTRG.9636	LOC100163748	heat shock 70 kDa protein cognate 4-like	70652.1	73108.8	103849	33725.9	27964.3	26853.9	5.38461e-09	-2.02543	2.14313e-13	0.245632	8.26885
MSTRG.5253	LOC100573546	uncharacterized LOC100573546	1544.23	1367.95	1938.58	607.067	555.119	573.049	3.75446e-07	-2.02502	1.49431e-11	0.245702	6.42545
MSTRG.8062	LOC100167754	solute carrier organic anion transporter family member 4C1-like	849.312	1010.94	670.566	339.621	219.759	342.687	0.00455945	-2.01201	1.81471e-07	0.247928	2.34109
MSTRG.18300	LOC100159560	Cystathionase-like	12839.2	13193.3	9370.18	4209.39	3723.87	4704.59	2.12993e-14	-2.01012	8.47733e-19	0.248253	13.6716
MSTRG.15303	LOC100165051	uncharacterized LOC100165051	1013.2	871.945	1313.08	421.268	411.526	322.43	0.000758309	-2.00573	3.01814e-08	0.249008	3.12015
MSTRG.2226	LOC100164976	zinc finger protein ush-like	472.493	490.339	571.743	196.267	184.806	173.269	0.00105863	-2.00219	4.21345e-08	0.249621	2.97526
MSTRG.17626	LOC100160060	protein gustavus, SPRY domain-containing SOCS box protein 1-like	7708.59	7855	8549.54	3585.09	2707.35	2398.79	1.11291e-11	-2.00196	4.4295e-16	0.249661	10.9535
MSTRG.6600	LOC100159065	heat shock 70 kDa protein cognate 4-like	236911	233458	320745	108954	82729.4	94277.7	4.00564e-10	-2.00178	1.59428e-14	0.249691	9.39733
MSTRG.6458	LOC100167070	uncharacterized LOC100167070	1192.85	1227.41	1672.84	593.473	526.858	361.165	0.0024407	-1.99988	9.71424e-08	0.250021	2.61249
MSTRG.15105	LOC100165732	homeobox protein EMX1-like	1411.71	1483.32	1324.47	568.416	482.44	470.667	4.23823e-10	-1.99555	1.68686e-14	0.250773	9.37282
MSTRG.19283	LOC100162963	solute carrier family 15 member 2-like	4359.53	4492.93	3278.8	1560.45	1354.44	1448.35	6.68422e-15	-1.99532	2.66038e-19	0.250812	14.1749
MSTRG.10510	Cyc	cycle	366.207	415.623	369.395	115.708	158.958	140.671	0.00673682	-1.99396	2.68132e-07	0.251048	2.17155
MSTRG.15665	LOC100164103	microtubule-actin cross-linking factor 1, isoforms 1/2/3/5-like	5409.61	5751.95	5289.49	2060.95	1728.66	2154.41	3.33131e-20	-1.99175	1.32589e-24	0.251434	19.4774
MSTRG.6144	LOC100161014	uncharacterized LOC100161014	2837.39	2706.77	3133.89	1300.59	973.697	875.707	5.65336e-09	-1.98856	2.2501e-13	0.25199	8.24769
MSTRG.8841	LOC100161594	short-chain specific acyl-CoA dehydrogenase, mitochondrial-like	1762.68	1868.15	2003.62	603.736	613.826	824.516	2.20222e-08	-1.98808	8.76505e-13	0.252075	7.65714
MSTRG.9490	LOC100168182	protein inscuteable homolog	1144.33	1284.53	1508.6	553	434.52	445.224	3.5514e-06	-1.98471	1.41349e-10	0.252663	5.4496
MSTRG.13254	LOC100164884	tissue alpha-L-fucosidase-like	754.369	692.505	898.528	351.28	255.894	248.255	0.00217825	-1.98109	8.66965e-08	0.253298	2.66189
MSTRG.5174	Idgf	imaginal disk growth factor	20411.5	25171.4	20777.9	8266.76	6840.81	8983.56	8.70428e-17	-1.97903	3.46439e-21	0.253661	16.0603
MSTRG.587	LOC100572761	uncharacterized LOC100572761	5157.89	4943.7	5514.47	2094.84	1872.9	1724.72	4.43199e-18	-1.97787	1.76398e-22	0.253864	17.3534
MSTRG.1992	LOC100164881	ral GTPase-activating protein subunit alpha-1-like	867.016	968.844	780.066	403.982	258.263	289.811	0.000528965	-1.97759	2.10533e-08	0.253914	3.27657
MSTRG.21596	LOC100167666	growth arrest-specific protein 2-like	1491.07	1967.26	1216.16	546.774	442.38	704.481	0.00055069	-1.97732	2.1918e-08	0.253961	3.25909
MSTRG.5207	LOC100168483	uncharacterized LOC100168483	611.688	597.395	799.325	276.869	201.567	256.281	0.00663073	-1.97604	2.6391e-07	0.254187	2.17844
MSTRG.12278	LOC100161337	uncharacterized LOC100161337	5599.77	5534.79	5873.48	2238.25	1889.6	2080.38	8.81037e-21	-1.97411	3.50662e-25	0.254526	20.055
MSTRG.1093	LOC100165697	uncharacterized LOC100165697	1512.66	1951.15	1568.11	619.005	551.118	665.663	1.72606e-09	-1.96926	6.8699e-14	0.255385	8.76294
MSTRG.8044	LOC100159900	#N/A	4431.15	4736.2	5330.92	2143.34	1566.61	1607.29	3.35046e-11	-1.96681	1.33352e-15	0.255817	10.4749
MSTRG.7333	LOC100162954	uncharacterized LOC100162954	1947.63	2300.34	2268.25	930.353	824.308	638.231	1.41011e-08	-1.9601	5.61238e-13	0.257011	7.85075
MSTRG.10415	LOC100166617	gamma-glutamyltranspeptidase 1-like	9543.26	10767.1	5266.27	3088.82	2807.36	3439.2	9.87903e-05	-1.95558	3.93195e-09	0.257818	4.00529
MSTRG.10645	LOC100160905	insulin gene enhancer protein isl-1-like	774.508	763.789	1065.76	383.684	288.345	291.652	0.00406756	-1.95438	1.61893e-07	0.258032	2.39067
MSTRG.22829	LOC100575296	histone H1C-like	2478.86	2505.67	2488.71	1102.45	825.281	827.22	1.44261e-11	-1.95241	5.74173e-16	0.258384	10.8409
MSTRG.16132	LOC100168845	uncharacterized LOC100168845	5237.66	5939.03	7075.75	2292.38	2164.72	2288.46	1.71021e-13	-1.95172	6.80679e-18	0.258508	12.767
MSTRG.21816	LOC100160123	twist-like	811.914	766.938	826.418	325.829	271.521	291.689	9.34405e-06	-1.95021	3.71902e-10	0.258779	5.02946
MSTRG.12115	LOC100168251	proton-coupled amino acid transporter 4-like	12962.1	12130.2	15109	5120.86	4679.78	5073.58	7.69747e-17	-1.94962	3.06367e-21	0.258884	16.1137
MSTRG.11493	LOC100167808	uncharacterized LOC100167808	1303.41	1310.53	1389.13	471.063	500.815	509.519	1.67201e-09	-1.94477	6.65476e-14	0.259756	8.77676
MSTRG.8083	LOC100570273	uncharacterized LOC100570273	1850.19	1593.8	2081.88	627.429	665.266	761.041	6.97304e-08	-1.94096	2.77534e-12	0.260443	7.15658
MSTRG.6995	LOC100162411	UDP-glucuronosyltransferase 1-6-like	790.953	597.4	549.968	246.155	213.672	258.825	0.00298906	-1.93836	1.18968e-07	0.260912	2.52447
MSTRG.15126	#N/A	#N/A	455.022	509.698	552.157	172.926	181.23	209.662	0.00374524	-1.93703	1.49064e-07	0.261154	2.42652
MSTRG.17299	LOC100169075	limkain-b1-like	1297.9	1453.02	1105.89	590.271	463.939	376.15	6.75158e-05	-1.93451	2.6872e-09	0.26161	4.17059
MSTRG.2207	LOC100164391	hemocyte protein-glutamine gamma-glutamyltransferase-like	2426.93	3649.69	2010.99	995.667	808.196	1181.97	0.000270808	-1.93406	1.07784e-08	0.261692	3.56734
MSTRG.12423	LOC100161456	uncharacterized LOC100161456	2351.33	2633.2	2784.09	1169.92	818.286	905.744	4.3571e-09	-1.93375	1.73417e-13	0.261748	8.3608
MSTRG.11582	LOC103308638	#N/A	6927.96	7883.12	9894.5	3462.81	2980.58	2776.53	9.44252e-10	-1.93363	3.75822e-14	0.26177	9.02491
MSTRG.22056	LOC100161007	formation of mitochondrial complexes 1 homolog-like	1183.64	1093.44	1430.5	477.16	446.434	460.96	2.47655e-06	-1.93196	9.85693e-11	0.262073	5.60615
MSTRG.16250	LOC100169115	facilitated trehalose transporter Tret1-like, Sugar transporter; similar to AGAP007484-PA	1446.54	1520.35	2388.16	751.983	602.414	656.829	0.00191836	-1.92691	7.63526e-08	0.262991	2.71707
MSTRG.9869	LOC100168198	elongation factor 2-like	200871	204738	251208	87143.9	78584.3	80083.7	4.08837e-16	-1.92601	1.62721e-20	0.263155	15.3884
MSTRG.14612	LOC100167261	UDP-glucuronosyltransferase 2B16-like	1047.61	807.137	1086.59	360.97	358.462	385.091	7.90056e-05	-1.91997	3.1445e-09	0.264261	4.10234
MSTRG.20770	LOC100159369	immunoglobulin superfamily containing leucine-rich repeat protein 2-like	2445.09	2411.8	2973.69	1070.94	948.341	920.697	6.92598e-11	-1.91988	2.75661e-15	0.264276	10.1595
MSTRG.16213	LOC100167841	uncharacterized LOC100167841	2674.56	3241.52	2893.47	1122.54	1104.46	1075.15	2.58079e-16	-1.91481	1.02718e-20	0.265208	15.5882
MSTRG.21347	LOC100571760	uncharacterized LOC100571760	1709.8	1984.7	1688.11	672.338	684.481	661.299	2.66099e-12	-1.91304	1.0591e-16	0.265533	11.575
MSTRG.20108	LOC100159667	<ApGLNT1> similar to proton-coupled amino acid transporter 1	4807.1	4861.64	5653.14	2096.6	1986.55	1698.09	6.72288e-14	-1.90772	2.67577e-18	0.266514	13.1724
MSTRG.2097	LOC100162245	protein MON2 homolog	2960.72	2975.76	2777.2	1260.21	1133.67	893.338	3.29224e-11	-1.90217	1.31034e-15	0.267541	10.4825
MSTRG.1028	LOC100167431	ecdysone 20-monooxygenase-like	1212.94	1293.07	990.314	409.66	388.347	519.352	1.32486e-05	-1.9004	5.27306e-10	0.26787	4.87783
MSTRG.14979	LOC100159263	uncharacterized LOC100159263	652.978	617.895	672.67	233.284	299.569	203.203	0.00493565	-1.89697	1.96444e-07	0.268506	2.30666
MSTRG.11265	LOC100160431	uncharacterized LOC100160431	1857.34	2035.76	2935.27	888.725	897.175	814.822	3.05812e-05	-1.89473	1.21716e-09	0.268925	4.51455
MSTRG.9385	LOC100163166	protein giant-lens-like	866.835	678.543	1029.76	336.319	328.202	316.372	0.00290385	-1.89392	1.15576e-07	0.269076	2.53703
MSTRG.1075	LOC100161577	collagen alpha-1(IV) chain-like	58649.9	73874.8	56628.4	24812.8	21098.9	25604.3	9.55215e-17	-1.89257	3.80185e-21	0.269327	16.0199
MSTRG.5115	LOC100164149	transcription factor Ken-like	663.459	1013.13	894.288	323.725	369.998	281.769	0.00345651	-1.89148	1.37572e-07	0.269531	2.46136
MSTRG.15771	LOC100161761	uncharacterized LOC100161761	1343.43	1813.82	1324.65	544.023	608.05	544.82	2.83661e-07	-1.88871	1.129e-11	0.270048	6.5472
MSTRG.8357	LOC100166459	tubulin beta-4 chain-like	14105.2	13858.2	18239.1	6441.8	5658.96	5523.52	1.41739e-11	-1.88843	5.64136e-16	0.270101	10.8485
MSTRG.2590	LOC100167724	lysine-specific demethylase 3A	1762.35	1580.78	1810.29	825.028	496.022	641.848	8.48598e-05	-1.88817	3.3775e-09	0.270149	4.0713
MSTRG.5097	LOC100568980	prolow-density lipoprotein receptor-related protein 1-like	2748.43	2854.78	3141.21	1397.87	1047.97	888.063	4.21908e-07	-1.88607	1.67924e-11	0.270544	6.37478
MSTRG.20039	LOC100167924	ribosomal protein S13e-like	63137.1	58102.8	81470.1	27307.9	23876.4	26313.9	1.31191e-10	-1.88481	5.22153e-15	0.270779	9.8821
MSTRG.16751	LOC100160440	uncharacterized LOC100160440	7006.94	6587.53	8526.17	2788.95	2915.35	2753.52	3.54882e-13	-1.88221	1.41246e-17	0.271268	12.4499
MSTRG.4922	Gs2	glutamine synthetase 2, GS	51234	58028	46908.5	16635	15298.8	27520.3	6.57778e-05	-1.87837	2.61802e-09	0.27199	4.18192
MSTRG.5556	LOC100165975	protein TANC2-like	1380.87	1421.83	1551.83	595.863	536.894	534.271	9.79452e-09	-1.87724	3.89832e-13	0.272203	8.00902
MSTRG.21863	LOC100162471	histone H1.1-like	940.412	703.461	1095.04	387.617	333.96	330.342	0.00679727	-1.87664	2.70538e-07	0.272317	2.16767
MSTRG.15924	LOC100159778	glycogen phosphorylase-like	23418.4	36080.5	22363.9	10125.4	9173.62	11817.1	1.54814e-07	-1.87583	6.16174e-12	0.27247	6.81019
MSTRG.10977	LOC100159694	uncharacterized LOC100159694	10043.3	10274.4	8013.26	4219.64	3228.74	3405.9	1.70636e-13	-1.86581	6.7915e-18	0.274369	12.7679
MSTRG.20845	LOC100159703	putative sodium-dependent multivitamin transporter-like, active transporters; similar to sodium/solute symporter	1122.24	1130.17	1461.51	475.535	443.285	513.899	3.41414e-05	-1.86502	1.35886e-09	0.27452	4.46672
MSTRG.10009	LOC100168211	uncharacterized LOC100168211	2684.95	3034.08	2651.32	1233.35	950.515	1031.86	2.46061e-12	-1.86374	9.79348e-17	0.274763	11.609
MSTRG.575	LOC100573056	uncharacterized LOC100573056	819.793	885.949	1230.68	392.064	367.586	376.224	0.0027698	-1.86134	1.10241e-07	0.27522	2.55755
MSTRG.18255	LOC100165831	CCR4-NOT transcription complex subunit 2-like	12660.9	12104.4	18285.4	6225.66	5145.71	5316.22	1.1794e-06	-1.85872	4.69413e-11	0.27572	5.92834
MSTRG.11908	LOC100164028	uncharacterized LOC100164028	1956.67	2122.08	2114.49	874.18	700.319	814.792	6.22324e-11	-1.85741	2.47691e-15	0.275971	10.206
MSTRG.10488	LOC100166524	#N/A	4404.95	4873.41	5060.41	2078.73	1840.64	1628.47	7.81169e-14	-1.85281	3.10913e-18	0.276853	13.1073
MSTRG.19843	LOC100166650	troponin C-like	2529.85	2283.03	1277.52	854.242	739.254	749.417	0.00376457	-1.85082	1.49833e-07	0.277234	2.42429
MSTRG.6465	LOC100167572	uncharacterized LOC100167572	1233.64	1129.05	1290.02	520.624	494.044	403.593	6.06246e-06	-1.84747	2.41292e-10	0.277879	5.21735
MSTRG.20780	LOC100164192	collagen alpha-2(I) chain-like	1647.66	2268.83	1560.42	873.259	645.908	596.741	9.47868e-05	-1.84567	3.77261e-09	0.278225	4.02325
MSTRG.13517	LOC100571618	uncharacterized LOC100571618	590.951	573.506	546.27	262.534	207.036	194.465	0.00452683	-1.8449	1.80173e-07	0.278374	2.34421
MSTRG.21437	LOC100158663	tetratricopeptide repeat protein 28-like	3048.5	3002.81	2981.66	1508.81	1027.27	977.218	4.48899e-07	-1.84165	1.78666e-11	0.279002	6.34785
MSTRG.9324	LOC100166108	uncharacterized LOC100166108	584.416	614.518	516.578	204.461	247.537	214.725	0.00199812	-1.83648	7.9527e-08	0.280005	2.69938
MSTRG.21295	LOC100165505	uncharacterized LOC100165505	1300.21	1500.55	1071.79	547.698	385.053	576.57	0.000583537	-1.82948	2.32254e-08	0.281365	3.23393
MSTRG.16184	LOC100165297	aminoacylase-1A-like	1448.47	1539.5	1144.83	551.509	532.098	529.769	1.96284e-07	-1.82605	7.8123e-12	0.282035	6.70712
MSTRG.6554	LOC100573752	cadherin-related tumor suppressor-like	1240.38	1264.07	1454.99	611.299	506.397	438.067	3.74051e-05	-1.82529	1.48876e-09	0.282184	4.42707
MSTRG.19048	LOC100167769	calcium-transporting ATPase sarcoplasmic/endoplasmic reticulum type-like	13211.5	13152.5	13889.8	6030.16	5362.79	4415.98	1.09067e-13	-1.82187	4.34097e-18	0.282854	12.9623
MSTRG.7491	Ance-like	angiotensin converting enzyme-like	3688.27	3050.52	3315.11	1379.79	1375.96	1193.32	2.08786e-12	-1.82132	8.30989e-17	0.282962	11.6803
MSTRG.551	LOC100163622	inositol 1,4,5-trisphosphate receptor-like	4752.12	5409.28	3798.06	1852.14	1822.86	1804.04	2.30481e-13	-1.81227	9.17336e-18	0.284743	12.6374
MSTRG.6019	LOC100166046	uncharacterized LOC100166046	1661.84	1728.74	1823.16	751.441	656.173	652.486	1.95358e-09	-1.80968	7.77543e-14	0.285254	8.70917
MSTRG.8922	Cpap3-b	cuticular protein analogous to peritrophins 3-B	1044.6	1077.16	1205.6	436.046	402.726	480.37	1.11571e-05	-1.80405	4.44063e-10	0.286369	4.95245
MSTRG.13004	LOC100161310	proton-coupled folate transporter-like	1024.97	1142.83	748.494	404.229	394.406	350.612	0.000622959	-1.80328	2.47944e-08	0.286523	3.20554
MSTRG.20512	LOC100162438	uncharacterized LOC100162438	3307.05	3492.38	3546.44	1445.19	1345.41	1314.26	6.0298e-16	-1.79923	2.39992e-20	0.287329	15.2197
MSTRG.7035	LOC100165977	ectonucleotide pyrophosphatase/phosphodiesterase family member 5-like	1311.17	986.458	996.919	392.045	451.082	464.521	0.000176816	-1.79717	7.03744e-09	0.287739	3.75248
MSTRG.20203	LOC100571903	putative ribosomal RNA methyltransferase C4F10.03c-like	2959.67	2733.88	3597.37	1229.78	1178.05	1294.11	4.44918e-09	-1.79692	1.77082e-13	0.287789	8.35172
MSTRG.1074	LOC100163579	collagen alpha-5(IV) chain	24222.2	31901.7	21777.4	10295.4	8986.89	11535.6	2.74897e-10	-1.7952	1.09412e-14	0.288131	9.56083
MSTRG.19552	LOC100169357	neurofilament heavy polypeptide	55060.4	52686.4	60811.6	22267.3	21918.5	22943.9	5.51641e-19	-1.79424	2.19558e-23	0.288324	18.2583
MSTRG.5100	LOC100168992	prolow-density lipoprotein receptor-related protein 1-like	2145.62	1768.92	2585.79	827.373	832.269	937.641	9.03715e-06	-1.79341	3.59688e-10	0.288489	5.04397
MSTRG.2380	LOC100160089	uncharacterized LOC100160089	6183.3	6305.31	6273.01	3058.4	2355.57	2059.99	6.80802e-10	-1.79114	2.70966e-14	0.288943	9.16698
MSTRG.9401	LOC100165783	uncharacterized LOC100165783	7706.38	8086.25	8253.37	3902.51	2975.18	2713.85	1.84117e-10	-1.78928	7.32802e-15	0.289316	9.73491
MSTRG.7033	LOC100168097	forkhead box protein O-like	1198.57	1302.84	976.607	505.2	376.67	500.669	0.000164759	-1.78923	6.55758e-09	0.289326	3.78315
MSTRG.14135	LOC100159275	probable ribonuclease ZC3H12C-like	2456.45	2803.94	2825.95	1245.02	918.516	1063.73	3.09053e-09	-1.78888	1.23006e-13	0.289397	8.50997
MSTRG.11755	LOC100160162	echinoderm microtubule-associated protein-like 1-like	4730.57	5058.32	6146.59	2296.44	2073.09	2008.78	7.53424e-11	-1.78614	2.9987e-15	0.289946	10.123
MSTRG.16898	LOC100158785	uncharacterized LOC100158785	2766.74	2906.69	3476.31	1349.2	1219.49	1095.52	4.96113e-09	-1.78451	1.97458e-13	0.290275	8.30442
MSTRG.9759	LOC100165870	uncharacterized LOC100165870	1998.98	2280.8	1571.09	704.71	954.433	670.005	5.97357e-05	-1.78249	2.37754e-09	0.29068	4.22377
MSTRG.17577	LOC100163030	bone morphogenetic protein 7-like	1056.33	1002.56	1107.14	499.091	377.869	392.271	0.000117123	-1.78017	4.6616e-09	0.29115	3.93136
MSTRG.20966	LOC100165776	uncharacterized LOC100165776	3985.09	4151.68	5388.69	1948.75	1655.34	1837.64	2.24737e-08	-1.77741	8.94475e-13	0.291707	7.64833
MSTRG.8727	LOC100160448	uncharacterized LOC100160448	2174.1	2086.54	2825.35	1116.36	878.274	859.068	1.30791e-05	-1.77687	5.20563e-10	0.291815	4.88342
MSTRG.16167	LOC100166576	uncharacterized LOC100166576	1759.05	1924.26	1647.22	884.991	610.843	644.472	5.63651e-06	-1.77205	2.24339e-10	0.292791	5.24899
MSTRG.8921	Cpap3-a1	cuticular protein analogous to peritrophins 3-A1	1681.58	1768.81	2132.4	836.295	810.666	605.611	3.73931e-05	-1.77032	1.48828e-09	0.293143	4.42721
MSTRG.8583	LOC100571000	uncharacterized LOC100571000	776.22	757.36	985.347	341.263	355.476	322.415	0.00239245	-1.76692	9.52219e-08	0.293835	2.62116
MSTRG.19608	LOC100164040	dmX-like protein 2	2633.39	2830.96	2603.25	1295.83	1137.43	818.289	1.71802e-06	-1.76527	6.83791e-11	0.294172	5.76497
MSTRG.5593	LOC100167763	transcription factor Sp9-like	3257.07	3035.27	3283.16	1388.91	1172.9	1303.94	7.77744e-13	-1.76476	3.0955e-17	0.294276	12.1092
MSTRG.10410	LOC100164852	gamma-glutamyltranspeptidase 1-like	841.552	889.094	879.313	409.43	382.062	262.297	0.00829212	-1.76429	3.30035e-07	0.294373	2.08133
MSTRG.6452	LOC100168065	uncharacterized LOC100168065	1361.83	1243.63	1380.09	562.124	470.044	580.974	3.82657e-06	-1.76025	1.52301e-10	0.295196	5.41719
MSTRG.15621	LOC100168961	uncharacterized LOC100168961	1089.27	1388.27	1364.29	507.402	517.529	533.296	7.96593e-06	-1.75379	3.17052e-10	0.296522	5.09876
MSTRG.21307	LOC100160703	neurogenic locus protein delta-like	3213.95	3725.66	3474.89	1581.06	1334.38	1308.29	1.81072e-12	-1.75245	7.20686e-17	0.296797	11.7421
MSTRG.5543	LOC100169524	hexokinase type 2-like	18704.8	18336.4	15111.6	7520.41	6560.05	7040.38	1.26766e-17	-1.75122	5.0454e-22	0.29705	16.897
MSTRG.152	LOC100159375	glucose-6-phosphate 1-dehydrogenase	11785.2	14035	8359.5	4885.44	4032.41	4880.31	3.8266e-07	-1.75028	1.52303e-11	0.297244	6.41719
MSTRG.24072	LOC115034857	#N/A	1853.25	1809.82	2052.57	917.422	796.529	613.677	1.94222e-05	-1.75011	7.73023e-10	0.297279	4.7117
MSTRG.22269	LOC100159124	bifunctional heparan sulfate N-deacetylase/N-sulfotransferase-like	996.426	1058.81	1332.29	546.594	415.166	419.524	0.00317285	-1.75001	1.26283e-07	0.2973	2.49855
MSTRG.14278	LOC100575402	uncharacterized LOC100575402	1985.46	1804.43	2042.65	874.881	799.635	702.886	3.12177e-08	-1.74595	1.2425e-12	0.298139	7.5056
MSTRG.2784	LOC100163966	scavenger receptor class B member 1-like	1668.81	1817.2	1240.11	628.174	490.664	799.015	0.00580203	-1.74292	2.30927e-07	0.298765	2.23642
MSTRG.4793	LOC100570746	noggin-like	881.761	785.454	1049.41	324.07	362.69	425.07	0.00909956	-1.74025	3.62172e-07	0.299318	2.04098
MSTRG.5328	LOC103309145	#N/A	2795.49	2864.53	2994.6	1155.22	1181.03	1197.85	7.0324e-14	-1.7401	2.79896e-18	0.299349	13.1529
MSTRG.21503	LOC103308991	#N/A	9222.77	9195.09	9609.99	3737.98	3655.9	4054.26	7.96635e-19	-1.73911	3.17069e-23	0.299555	18.0987
MSTRG.17013	LOC100166546	acyl-CoA Delta(11) desaturase-like	4659.66	4125.82	5595.17	1999.53	1923.15	1972.64	2.83218e-09	-1.73871	1.12724e-13	0.299637	8.54788
MSTRG.17682	LOC100167881	uncharacterized LOC100167881	1983.02	1765.55	1567.61	905.197	583.163	682.361	0.000179084	-1.737	7.12771e-09	0.299994	3.74694
MSTRG.10766	LOC100162326	DNA-directed RNA polymerase II subunit RPB1-like	7075.24	7901.52	9517.86	3859.99	3118.31	3065.12	2.39374e-08	-1.73643	9.52731e-13	0.300111	7.62092
MSTRG.2105	LOC100167570	ATP-binding cassette sub-family F member 1-like	18889.6	18478.1	24832.8	8430.24	8369.75	8725.98	1.1726e-09	-1.73626	4.66705e-14	0.300146	8.93085
MSTRG.1050	LOC100165680	5-aminolevulinate synthase, erythroid-specific, mitochondrial-like	5231.7	3570.56	6600.81	1959.1	2053.1	2336.19	0.00583179	-1.7337	2.32111e-07	0.30068	2.2342
MSTRG.4807	LOC100161412	high affinity cationic amino acid transporter 1-like	1480.84	1747.16	2041.23	636.428	766.985	760.975	3.92379e-05	-1.73143	1.56171e-09	0.301152	4.40629
MSTRG.21233	LOC100162319	hemocytin-like	7546.89	7313.65	7287.26	2902.8	3349.2	2824.1	1.57323e-16	-1.73073	6.26161e-21	0.3013	15.8032
MSTRG.7456	LOC100161937	torso-like protein-like	1437.05	1457.38	997.457	572.778	460.099	556.259	0.000479443	-1.73062	1.90823e-08	0.301322	3.31926
MSTRG.22912	LOC100167144	Asparaginase	805.741	873.914	864.546	380.926	301.869	361.321	0.000423169	-1.72958	1.68426e-08	0.30154	3.37349
MSTRG.13715	LOC100169393	neurogenic protein big brain-like	3655.51	3618.8	3906.26	1636.51	1366.51	1589.9	1.79973e-12	-1.72855	7.16312e-17	0.301756	11.7448
MSTRG.18499	LOC100164801	uncharacterized LOC100164801	2254.56	2853.55	2330.2	1134	910.058	1003.68	2.78151e-09	-1.72815	1.10707e-13	0.301839	8.55572
MSTRG.19751	LOC100165619	spectrin beta chain-like	5011.07	5386.68	4547.59	2521.47	1868.09	1763.47	6.37926e-09	-1.71831	2.53901e-13	0.303904	8.19523
MSTRG.7384	LOC100161869	protein yellow-like	1020.81	1403.27	1080.44	442.05	411.086	589.815	0.00505832	-1.71539	2.01326e-07	0.304519	2.29599
MSTRG.4686	LOC100570134	uncharacterized LOC100570134	1820.21	1755.77	1798.34	877.812	668.52	679.899	6.4914e-07	-1.71012	2.58364e-11	0.305635	6.18766
MSTRG.9405	LOC100161012	uncharacterized LOC100161012	3797.94	3540.13	5170.63	1956.32	1460.91	1796.15	0.000121235	-1.70691	4.82527e-09	0.306315	3.91637
MSTRG.8868	LOC100159965	alpha-N-acetylgalactosaminidase-like	5144.68	3602.86	4643.15	2008.6	1810.6	1749.32	1.79692e-07	-1.70622	7.15193e-12	0.306462	6.74547
MSTRG.1274	LOC100169459	uncharacterized LOC100169459	5459.63	4939.44	5076.88	2432.52	2118.34	1890.55	2.68163e-12	-1.69981	1.06731e-16	0.307827	11.5716
MSTRG.2383	LOC100168575	uncharacterized LOC100168575	1447.15	1291.15	1336.89	588.876	598.855	510.383	2.18901e-06	-1.69829	8.71249e-11	0.308151	5.65975
MSTRG.1913	LOC100574649	uncharacterized LOC100574649	2049.82	2276.56	2160.71	963.459	921.135	820.202	2.33417e-10	-1.69482	9.29021e-15	0.308894	9.63187
MSTRG.10130	LOC100161429	uncharacterized LOC100161429	50624.3	49600.1	60878.6	24419.8	20737.2	22335.9	9.96425e-12	-1.69115	3.96587e-16	0.30968	11.0016
MSTRG.9508	LOC100162408	homeodomain-interacting protein kinase 2-like	1645.66	1991.06	1255.24	787.346	672.387	575.712	0.00116367	-1.69045	4.63152e-08	0.309829	2.93417
MSTRG.7913	LOC100161303	possible pseudogene or miscRNA, No KEGG entry	5023.34	5035.49	4305.62	2513.37	1927.19	1558.75	3.21006e-06	-1.68895	1.27764e-10	0.310152	5.49349
MSTRG.13871	LOC100169458	facilitated trehalose transporter Tret1-like, Sugar transporter	1926.67	1622.91	1502.2	758.084	710.406	643.595	1.04015e-06	-1.68835	4.1399e-11	0.310281	5.9829
MSTRG.8287	LOC100168234	nuclear receptor-binding protein homolog	2884.71	3335.62	3029.26	1439.2	1089.04	1341.67	2.36326e-09	-1.68642	9.40601e-14	0.310698	8.62649
MSTRG.5091	LOC103308446	#N/A	5394.56	5495.94	5914.19	2507.8	2331.96	2220.68	6.43327e-15	-1.68161	2.5605e-19	0.311735	14.1916
MSTRG.19693	LOC100165309	eukaryotic translation initiation factor 3 subunit A-like	45778.1	41997.7	54722	21430.1	19032	19565.9	1.554e-10	-1.68095	6.18508e-15	0.311877	9.80855
MSTRG.2507	LOC100162279	probable G-protein coupled receptor Mth-like 5-like	2128.7	1900.74	2585.13	1116.86	850.541	822.802	0.000226381	-1.68028	9.0102e-09	0.312021	3.64516
MSTRG.19080	LOC100161350	uncharacterized LOC100161350	923.337	899.908	882.09	431.735	362.316	343.588	0.000407125	-1.67882	1.6204e-08	0.312339	3.39027
MSTRG.927	LOC100160641	tyrosine-protein kinase transmembrane receptor Ror-like	1175.67	1072.89	1195.61	433.806	470.94	545.737	0.000142877	-1.67785	5.68666e-09	0.312547	3.84504
MSTRG.2099	LOC100166342	venom dipeptidyl peptidase 4-like	2632.6	3228.67	3326.91	1392.81	1167.09	1308.99	1.26914e-08	-1.67712	5.05132e-13	0.312706	7.89649
MSTRG.17870	LOC100572339	uncharacterized LOC100572339	999.471	816.703	887.443	429.105	343.153	366.935	0.00189492	-1.67683	7.54195e-08	0.31277	2.72241
MSTRG.16567	LOC100165993	serine/arginine rich splicing factor-like	11450.8	10716.8	14072	5833.28	4768.62	4733.84	4.22387e-08	-1.67229	1.68114e-12	0.313754	7.37429
MSTRG.13889	LOC100168481	uncharacterized LOC100168481	6605.08	6361.43	5204.08	2849.12	2324.44	2474.95	6.68085e-12	-1.671	2.65904e-16	0.314036	11.1752
MSTRG.8060	LOC100158857	fatty acid synthase-like	7705.83	7364.41	5866.93	2846.47	3417.89	2557.53	5.4139e-09	-1.66743	2.15479e-13	0.314815	8.26649
MSTRG.19103	LOC100162795	superoxide dismutase [Cu-Zn]-like	1264.57	1223.02	1202.72	596.574	492.423	472.446	2.64108e-05	-1.66527	1.05118e-09	0.315285	4.57822
MSTRG.17956	LOC100164446	uncharacterized LOC100164446	1821.57	1689.91	1797.73	841.101	703.628	704.563	1.73479e-07	-1.66516	6.90463e-12	0.31531	6.76075
MSTRG.16667	LOC100162704	sodium/nucleoside cotransporter 2-like, active transporters;sodium/nucleoside cotransporter; similar to AGAP005989-PA, partial	1786.75	1974.12	2237.82	823.235	899.34	825.368	3.2574e-07	-1.66029	1.29648e-11	0.316376	6.48713
MSTRG.20627	LOC100167606	probable G-protein coupled receptor Mth-like 1-like	2007.39	1990.27	2083.46	915.737	839.31	826.449	9.79048e-10	-1.65927	3.89671e-14	0.3166	9.0092
MSTRG.8211	LOC100165137	uncharacterized LOC100165137	2215.9	2347.94	2027.2	1025.97	969.677	800.617	1.34853e-08	-1.6564	5.36727e-13	0.31723	7.87014
MSTRG.20094	LOC100161721	uncharacterized LOC100161721	3179.28	3453.43	2923.59	1353.23	1123.41	1575.52	5.38486e-08	-1.65634	2.14323e-12	0.317243	7.26883
MSTRG.1257	LOC100165138	plasma membrane calcium-transporting ATPase 3-like	6428.37	7659.44	8450.78	3898.38	3083.66	2616.7	9.46526e-06	-1.6558	3.76727e-10	0.317361	5.02387
MSTRG.20705	LOC100162356	putative phospholipase B-like lamina ancestor-like	2067.07	1731.09	2221	923.765	850.538	791.902	3.13635e-06	-1.65543	1.2483e-10	0.317443	5.50358
MSTRG.21545	LOC100160005	splicing factor U2af 38 kDa subunit-like	4292.7	3167.36	4723	1770.56	1560.67	1871.33	4.82021e-05	-1.65518	1.91849e-09	0.317497	4.31693
MSTRG.16264	LOC100164718	protein cueball-like	2729.55	2779.33	4140.97	1572.16	1144.16	1418.46	0.0065003	-1.65007	2.58718e-07	0.318625	2.18707
MSTRG.17688	LOC100160868	potassium/sodium hyperpolarization-activated cyclic nucleotide-gated channel 1-like	1494.89	1459.72	1711.07	738.92	728.553	526.324	0.00069227	-1.64937	2.7553e-08	0.318779	3.15972
MSTRG.11609	Elovl6	ELOVL family member 6, elongation of long chain fatty acids	10520.7	10303.9	12192.2	4867.1	4661.33	4603.16	2.9409e-13	-1.64535	1.17051e-17	0.319669	12.5315
MSTRG.11559	LOC100159805	uncharacterized LOC100159805	3686.41	5106.83	5150.89	2053.28	1782.96	2127.02	8.18286e-07	-1.64405	3.25686e-11	0.319958	6.0871
MSTRG.6970	LOC100166061	rho GTPase-activating protein 18-like	1367.29	1352.69	1317.27	566.864	590.462	568.683	5.4535e-07	-1.643	2.17055e-11	0.320189	6.26332
MSTRG.17476	LOC100161030	transitional endoplasmic reticulum ATPase TER94-like	45644.6	44095.2	59288.1	23928.1	21058	19028.5	3.39238e-07	-1.64181	1.3502e-11	0.320455	6.4695
MSTRG.7624	LOC100159968	uncharacterized LOC100159968	4286.74	3276.41	3075.67	1775.22	1157.73	1615.12	0.000490859	-1.64168	1.95367e-08	0.320483	3.30904
MSTRG.15492	#N/A	#N/A	956.461	955.075	1112.04	521.51	400.627	374.491	0.0091488	-1.64124	3.64131e-07	0.32058	2.03864
MSTRG.17197	LOC100165400	uncharacterized LOC100165400	1600.33	1651.05	2138.71	828.947	764.153	723.107	0.000107698	-1.64002	4.2865e-09	0.320852	3.96779
MSTRG.7882	LOC100165671	semaphorin-5B-like	2410.41	2559.74	2593.28	1221.86	1114.09	907.575	7.44266e-08	-1.63895	2.96225e-12	0.321091	7.12827
MSTRG.5615	LOC100163858	guanylate cyclase 32E-like	887.122	1009.03	1009.29	379.855	425.776	438.905	0.000417411	-1.63857	1.66134e-08	0.321174	3.37944
MSTRG.2681	LOC100167008	uncharacterized LOC100167008	3270.81	3366.13	4848.11	1559.72	1594.78	1791.7	0.000250029	-1.63788	9.95141e-09	0.321328	3.60201
MSTRG.7679	LOC100161569	dorsal-ventral patterning protein Sog-like	1110.37	1091.18	1099.84	506.286	446.613	465.465	2.76299e-05	-1.63302	1.0997e-09	0.322412	4.55862
MSTRG.9435	LOC100166022	serine/arginine-rich splicing factor 1-like	8928.98	8000	10808.6	4234.25	3755.68	3978.52	3.01443e-08	-1.63172	1.19977e-12	0.322704	7.52079
MSTRG.2357	LOC100574212	1,4-alpha-glucan-branching enzyme-like	3983.88	4309.16	2429.8	1533.96	1318.54	1731.72	0.00311234	-1.62963	1.23874e-07	0.32317	2.50691
MSTRG.6241	LOC100161103	possible pseudogene or miscRNA, No KEGG entry	27660.4	29070.7	38354.9	15342.5	12457.6	13297	1.23809e-06	-1.6288	4.92771e-11	0.323356	5.90725
MSTRG.5740	LOC100167167	SWI/SNF complex subunit SMARCC2-like	8000.62	6937.67	8720.98	3837.4	3031.18	3350.26	1.46263e-08	-1.62803	5.82143e-13	0.323529	7.83486
MSTRG.17225	#N/A	#N/A	3169.29	3683.72	4193.56	1457.91	1548.06	1766.97	4.2127e-07	-1.6249	1.6767e-11	0.324232	6.37544
MSTRG.12510	Vha16	V-type proton ATPase 16 kDa proteolipid subunit (EC:3.6.3.14), active transporters; vacuolar H+-ATPase; hypothetical protein	27328.3	27257.4	31596.2	13564.9	11947.2	11759.7	1.77632e-12	-1.62349	7.06992e-17	0.32455	11.7505
MSTRG.20232	LOC100164026	nose resistant to fluoxetine protein 6-like	1220.42	1193.94	1393.55	528.677	666.89	451.183	0.00668775	-1.62294	2.66179e-07	0.324672	2.17472
MSTRG.2106	LOC100165525	membrane-associated protein Hem-like	3788.4	3621.06	4233.14	1987.1	1568.32	1483.8	2.85169e-07	-1.62273	1.135e-11	0.324721	6.5449
MSTRG.3197	LOC100163533	uncharacterized LOC100163533	4389.09	4337.56	5200.99	2102.93	1875.01	2051.23	5.32559e-10	-1.62231	2.11964e-14	0.324814	9.27363
MSTRG.7164	LOC100165723	protein fem-1 homolog CG6966-like	4784.27	4615.38	6568.66	2259.93	2216.95	2452.72	9.93639e-06	-1.62149	3.95478e-10	0.324999	5.00277
MSTRG.10413	LOC100168687	gamma-glutamyltranspeptidase 1-like	1827.79	1825.02	2031.79	724.489	1054.79	678.843	0.00269631	-1.62127	1.07316e-07	0.32505	2.56923
MSTRG.6262	LOC100166423	uncharacterized LOC100166423	6633.48	6533.48	7954.58	3392.91	2916.28	2852.43	2.59474e-09	-1.61866	1.03273e-13	0.325638	8.58591
MSTRG.6198	LOC100160933	deoxyuridine 5'-triphosphate nucleotidohydrolase, mitochondrial-like	12402.7	11622.3	13321.9	5747.48	4824.49	5637.56	4.33675e-12	-1.61539	1.72607e-16	0.326378	11.3628
MSTRG.21642	LOC100161329	monocarboxylate transporter 14-like	11323.1	9803.64	12324	4630.93	4376.66	5534.21	2.54059e-08	-1.61364	1.01118e-12	0.326773	7.59507
MSTRG.8693	LOC100574972	uncharacterized LOC100574972	1933.15	2063.69	2024.67	1021.58	835.568	761.137	1.25294e-06	-1.60914	4.98683e-11	0.327794	5.90207
MSTRG.7026	LOC100163301	uncharacterized LOC100163301	2089.82	2138.34	2258.37	1104.03	898.095	824.594	1.08534e-06	-1.60589	4.31977e-11	0.328534	5.96443
MSTRG.1056	LOC100167464	uncharacterized LOC100167464	767.034	673.081	757.852	311.601	322.526	324.196	0.00616228	-1.60524	2.45265e-07	0.32868	2.21026
MSTRG.15312	LOC100163343	possible pseudogene or miscRNA, No KEGG entry	1801.05	1921.06	1755.03	823.628	768.75	793.748	6.08868e-09	-1.60294	2.42335e-13	0.329206	8.21548
MSTRG.21784	LOC100166679	splicing factor 1-like	6194.75	5378.3	7031.43	2852.51	2710.72	2578.08	1.18338e-08	-1.60138	4.70999e-13	0.329561	7.92687
MSTRG.5657	#N/A	#N/A	813.402	687.133	824.921	330.134	336.575	350.815	0.00953067	-1.60103	3.7933e-07	0.329642	2.02088
MSTRG.11119	LOC100574872	uncharacterized LOC100574872	2118.32	2448.41	2510.26	1142.87	1021.47	927.911	1.2294e-07	-1.60005	4.89312e-12	0.329865	6.91031
MSTRG.2252	LOC100163680	dihydropyrimidine dehydrogenase [NADP+]-like	3869.9	3971.11	3421.37	1489.09	1716.49	1700.79	8.75763e-12	-1.59958	3.48562e-16	0.329974	11.0576
MSTRG.21532	LOC100159841	probable 4-coumarate--CoA ligase 3-like	6249.88	5050.88	5769.36	2372.94	2607.12	2486.18	9.94307e-11	-1.59797	3.95744e-15	0.330341	10.0025
MSTRG.1990	LOC100161405	cytochrome P450 4C1-like	6560.18	5938.11	8686.46	3362.04	2808.55	3134.96	3.71679e-05	-1.59714	1.47932e-09	0.330531	4.42983
MSTRG.11513	LOC100159569	inter-alpha-trypsin inhibitor heavy chain H4-like	3037.53	3562.39	2072.15	1087.5	1295.77	1388.48	0.00152953	-1.5936	6.0877e-08	0.331344	2.81544
MSTRG.11030	LOC100161043	trehalase-like	1978.65	2225.95	2700.36	1178.61	818.089	1038.04	0.0011752	-1.59249	4.6774e-08	0.331599	2.92989
MSTRG.600	LOC100167165	scavenger receptor class B member 1-like	1276.36	1331.1	1316.87	605.405	571.875	544.758	5.81252e-06	-1.59023	2.31344e-10	0.332119	5.23564
MSTRG.5179	LOC100159521	WW domain-binding protein 4-like	2340.94	2170.86	2735	1238.45	997.564	962.282	2.34706e-05	-1.58408	9.34153e-10	0.333538	4.62948
MSTRG.5363	LOC100163428	facilitated trehalose transporter Tret1-like, Sugar transporter	4277.41	3722.79	5306.49	1774.65	1765.44	2338.03	0.000557689	-1.58351	2.21966e-08	0.333669	3.25361
MSTRG.10592	Pdp1	par domain protein 1	1099.3	1108.46	991.16	491.548	408.864	505.986	0.000428498	-1.58346	1.70546e-08	0.33368	3.36805
MSTRG.19972	LOC100569852	esterase E4	7485.59	10368.6	10591.9	3916.42	4462.42	4143.39	6.35231e-07	-1.58334	2.52828e-11	0.333707	6.19707
MSTRG.15793	LOC100164369	dual specificity protein phosphatase 10-like	1307.16	1522.32	1484.83	664.725	615.551	619.811	7.00327e-06	-1.58139	2.78737e-10	0.334159	5.1547
MSTRG.9654	LOC100164095	fatty acid 2-hydroxylase-like	2663.39	3371.31	3379.15	1553.9	1386.82	1211.02	1.8947e-06	-1.58005	7.5411e-11	0.33447	5.72246
MSTRG.8089	LOC100158928	putative odorant-binding protein A10-like	4990.75	4573.11	4332.38	2303.23	1919.23	1900.22	6.36541e-11	-1.57949	2.5335e-15	0.334601	10.1962
MSTRG.19074	LOC100163251	WW domain-binding protein 2-like	3513.72	3604.87	4230.54	1762.65	1685.98	1569.32	7.9121e-09	-1.57773	3.14909e-13	0.335008	8.10171
MSTRG.20934	LOC100165946	60S ribosomal protein L18-like	73390.7	63138.8	84443.4	33867.1	31600	32362.2	6.9157e-09	-1.57768	2.75252e-13	0.335021	8.16016
MSTRG.8974	LOC100168537	uncharacterized LOC100168537	4227.49	3847.98	4284.92	1789.72	1806.59	1863.45	7.43166e-12	-1.57746	2.95788e-16	0.335072	11.1289
MSTRG.12410	LOC100168900	possible pseudogene or miscRNA, No KEGG entry	1836.52	1950.25	1812.54	856.229	873.622	740.735	9.67263e-08	-1.57663	3.8498e-12	0.335264	7.01446
MSTRG.13012	LOC100165800	solute carrier family 46 member 3-like	1456.6	1539.58	1249.84	719.395	568.794	582.712	0.000101732	-1.57663	4.04902e-09	0.335264	3.99254
MSTRG.971	LOC100163985	low-density lipoprotein receptor-related protein 5-like	4182.1	4121.37	4586.55	2180.09	1773.49	1747.73	6.69291e-09	-1.576	2.66385e-13	0.335411	8.17438
MSTRG.7081	LOC100168732	transcription factor HNF-4 homolog	1204.27	1169	1069.16	555.381	455.567	508.617	0.000149919	-1.57559	5.96694e-09	0.335506	3.82414
MSTRG.13287	LOC100158931	MAGUK p55 subfamily member 5-like	3893.52	3916.06	4382.17	2177.68	1650.15	1581.74	1.80997e-06	-1.57018	7.20385e-11	0.336766	5.74233
MSTRG.13887	LOC100169086	enhancer of split mgamma protein-like	1344.17	1101.04	1326.29	645.461	517.843	514.011	0.00276987	-1.56637	1.10244e-07	0.337656	2.55754
MSTRG.3035	LOC100164077	cationic amino acid transporter 2, amino acid transporter, cationic AA transmembrane	1707.82	1627.25	1649.98	751.151	744.786	716.839	1.84804e-07	-1.56545	7.35537e-12	0.337873	6.73329
MSTRG.8465	LOC100574710	pancreatic triacylglycerol lipase-like	1218.98	988.671	1143.25	462.695	460.215	567.819	0.00483663	-1.56209	1.92503e-07	0.33866	2.31546
MSTRG.12630	LOC100162337	uncharacterized LOC100162337	5299.25	5441.92	4945.22	2290.1	1972.64	2711.22	7.94218e-09	-1.55913	3.16107e-13	0.339356	8.10006
MSTRG.10776	LOC100166500	uncharacterized LOC100166500	1451.83	1557.97	1425.87	708.212	605.701	661.366	3.46402e-06	-1.55885	1.37871e-10	0.339421	5.46042
MSTRG.20768	LOC100169212	uncharacterized LOC100169212	1915.09	1920.08	2184.71	927.847	935.808	823.78	8.68025e-07	-1.55743	3.45483e-11	0.339757	6.06147
MSTRG.10403	LOC100160368	spectrin beta chain-like	6453.13	6572.35	7335.07	3785.59	2670.62	2632.68	1.14383e-05	-1.55738	4.55258e-10	0.339767	4.94164
MSTRG.3071	LOC100167304	uncharacterized LOC100167304	1137.96	1126.89	1222.07	632.377	447.246	478.646	0.00834698	-1.55478	3.32218e-07	0.340381	2.07847
MSTRG.14003	LOC100161538	slit homolog 3 protein-like	2861.03	2763.98	2470.37	1339.64	1272.61	995.847	7.25634e-07	-1.55443	2.88809e-11	0.340463	6.13928
MSTRG.7637	LOC100160412	prickle-like protein 3-like	1282.28	1558.97	1133.33	638.679	548.788	580.018	0.000362827	-1.55411	1.44409e-08	0.340538	3.4403
MSTRG.5008	LOC100570390	fatty acid synthase-like	12842.3	12578.6	10474.6	5774.62	5614.08	4603.17	1.37976e-10	-1.55298	5.49159e-15	0.340806	9.8602
MSTRG.7502	LOC100169367	mothers against decapentaplegic homolog 6-like	2843.13	2675.46	2784.26	1431.3	1191.94	1086.7	1.93795e-07	-1.55282	7.71322e-12	0.340843	6.71266
MSTRG.16592	LOC100162256	MCT, pyruvate cytoplasm transporter	9946.35	9395.11	11581.7	4830.83	4343.15	4693.25	8.61093e-10	-1.54945	3.42724e-14	0.34164	9.06495
MSTRG.5138	LOC100159441	trehalose transporter Tret1	1776.4	1963.3	2113.18	1026.17	888.689	708.868	0.000425788	-1.54847	1.69468e-08	0.341873	3.37081
MSTRG.5096	14-3-3zeta	14-3-3 protein zeta	41032.8	41718.8	50899.2	21151.3	19328.8	19482.9	7.88947e-10	-1.5484	3.14009e-14	0.34189	9.10295
MSTRG.5213	LOC100572035	uncharacterized LOC100572035	1384.51	1278.28	1698.52	693.038	656.302	612.809	0.00183497	-1.54602	7.30336e-08	0.342454	2.73637
MSTRG.8227	LOC100158775	spliceosome associated protein-like	5425.48	4876.9	6892.21	2838.92	2510.24	2393.64	2.57002e-05	-1.54462	1.02289e-09	0.342785	4.59006
MSTRG.2827	LOC100160648	uncharacterized LOC100160648	3256.99	3411.46	4205.11	1856.04	1661.46	1371.6	6.28158e-05	-1.54454	2.50013e-09	0.342804	4.20193
MSTRG.19668	LOC100158812	solute carrier family 23 member 2-like, active transporters; similar to CG6293 CG6293-PA	1209.78	1207.96	1439.71	553.316	589.838	592.594	0.000517796	-1.54084	2.06088e-08	0.343686	3.28584
MSTRG.20539	LOC100161805	ubiquitin-conjugating enzyme E2-24 kDa-like	3062.1	2711.12	2674.46	1505.08	1105.43	1184.71	3.10692e-06	-1.54061	1.23658e-10	0.343741	5.50767
MSTRG.14816	LOC100165041	serine palmitoyltransferase 1-like	2515.78	2311.31	2382.53	1080.08	998.129	1170.54	1.51542e-08	-1.53419	6.03151e-13	0.345273	7.81947
MSTRG.10559	LOC100164968	uncharacterized LOC100164968	1777.56	1927.6	1801.33	739.694	903.203	835.978	1.26874e-06	-1.53346	5.04971e-11	0.345449	5.89663
MSTRG.21917	LOC100158987	possible pseudogene or miscRNA, No KEGG entry	3543	3368.21	4007.5	1756.93	1739.12	1437.03	3.87364e-07	-1.53336	1.54175e-11	0.345471	6.41188
MSTRG.19743	LOC100158923	zinc finger protein-like	52311.5	47766.3	62998.7	25499.5	24122.1	24185.5	2.04584e-08	-1.53174	8.14265e-13	0.34586	7.68913
MSTRG.13198	LOC100160033	proton-coupled amino acid transporter 4-like	2405.2	2303.65	1767.31	943.987	981.977	986.887	1.44772e-06	-1.53133	5.76208e-11	0.345959	5.83931
MSTRG.10794	LOC100163314	low density lipoprotein receptor adapter protein 1-like	1381.32	1495.38	1645.64	697.399	610.175	736.356	0.000171416	-1.5309	6.82254e-09	0.346061	3.76595
MSTRG.14001	LOC100168654	lysine-specific histone demethylase 1A-like	1530.29	1400.38	1930.17	807.363	664.886	732.108	0.00518264	-1.52925	2.06274e-07	0.346458	2.28545
MSTRG.12343	LOC100169491	triple functional domain protein-like	2117.27	1995.73	2030.87	1103.16	867.392	807.794	2.03992e-05	-1.5278	8.11909e-10	0.346806	4.69039
MSTRG.6786	LOC100164492	uncharacterized LOC100164492	1111.59	1166.81	1146.18	475.049	520.942	551.131	0.000245964	-1.52758	9.7896e-09	0.346858	3.60913
MSTRG.17631	LOC100575191	uncharacterized LOC100575191	1925.72	2243.11	2178.44	1144.14	753.241	972.876	0.000605258	-1.52697	2.40899e-08	0.347006	3.21806
MSTRG.13884	LOC100165000	protein hairy-like	1583.67	1532.14	1909.93	831.198	668.113	779.896	0.000642262	-1.52694	2.55627e-08	0.347012	3.19229
MSTRG.11357	LOC100167473	venom carboxylesterase-6-like	19879.1	15285.9	20062.2	7928.35	8217.5	8907.79	2.196e-07	-1.52532	8.74028e-12	0.347404	6.65837
MSTRG.7995	LOC100169293	staphylococcal nuclease domain-containing protein 1-like	59591.4	61798.6	68448.4	30731.5	28833.6	26656.3	3.74143e-12	-1.52037	1.48913e-16	0.348598	11.427
MSTRG.7189	LOC100167399	U3 small nucleolar ribonucleoprotein protein imp4-like	4165.34	3675.22	5026.51	1998.91	1820.7	2045.08	9.54731e-06	-1.51776	3.79993e-10	0.349227	5.02012
MSTRG.10285	#N/A	#N/A	1766.72	1702.92	2080.97	775.846	890.687	863.559	6.31657e-05	-1.5143	2.51406e-09	0.350067	4.19952
MSTRG.4872	LOC100160747	uncharacterized LOC100160747	6435.33	6424.29	8100.79	3775.09	2873.97	2933.89	2.70296e-05	-1.51088	1.0758e-09	0.350897	4.56816
MSTRG.17033	LOC100163458	eukaryotic translation initiation factor 3 subunit G-like	10002.4	10347.2	13427	5534.02	4867.31	5044.48	1.98702e-06	-1.51059	7.90855e-11	0.350967	5.7018
MSTRG.15799	LOC100166388	retinol dehydrogenase 12-like	1408.81	1496.5	1693.51	794.579	594.022	712.472	0.00173736	-1.50952	6.91487e-08	0.351228	2.76011
MSTRG.16812	LOC100168786	tyrosine-protein kinase PR2-like	2324.77	2263.7	2309.38	1185.42	931.051	1032.98	3.4637e-07	-1.50783	1.37859e-11	0.351639	6.46046
MSTRG.5656	LOC100163169	40S ribosomal protein SA-like	117046	107638	144860	59946.1	51873.1	57667.2	8.71256e-07	-1.50485	3.46769e-11	0.352366	6.05985
MSTRG.15263	LOC100169390	heterogeneous nuclear ribonucleoprotein K-like	23661	22450.6	27712.5	12692.4	11263.6	9908.51	2.43587e-07	-1.50263	9.69502e-12	0.352911	6.61335
MSTRG.241	LOC100571724	uncharacterized LOC100571724	5990.09	3624.44	4009.25	1966.1	2072.37	2198.07	0.00492086	-1.50094	1.95855e-07	0.353323	2.30796
MSTRG.16387	LOC100164338	uncharacterized LOC100164338	1499.28	1690.75	1278.73	766.473	592.963	681.836	0.000708432	-1.49933	2.81963e-08	0.353717	3.1497
MSTRG.8323	LOC100166941	#N/A	3817.51	4266.19	4551.78	2135.42	1734.82	1932.9	6.84189e-08	-1.49704	2.72314e-12	0.35428	7.16482
MSTRG.21383	LOC100162568	acyl-CoA synthetase family member 2, mitochondrial-like	2211.33	2048.78	2379.48	1004.72	903.854	1144.88	1.25375e-05	-1.49502	4.99004e-10	0.354776	4.90179
MSTRG.22773	LOC100167709	40S ribosomal protein S28-like	4434.69	3997.2	4755.95	2065.73	1897.23	2124.51	1.51561e-08	-1.48787	6.03228e-13	0.356537	7.81941
MSTRG.20798	LOC100165590	protein hedgehog-like	1136.56	1094.47	1184.83	548.187	557.836	474.309	0.00148285	-1.48148	5.90187e-08	0.358121	2.8289
MSTRG.21972	LOC100169407	jmjC domain-containing histone demethylation protein 1-like	6481.63	6760.41	8217.64	3610.98	3126.81	3209.91	3.60641e-07	-1.4807	1.43539e-11	0.358315	6.44292
MSTRG.9754	LOC100163589	Phosphoserine transaminase	9247.84	8596.52	10475.7	4647.76	3954.37	4522.02	2.72018e-08	-1.48061	1.08266e-12	0.358338	7.5654
MSTRG.4965	LOC100162692	fatty acid synthase-like	9041.1	6027.91	7270.47	3597.55	3222.09	3543.32	5.23907e-05	-1.47629	2.0852e-09	0.359411	4.28075
MSTRG.13532	LOC100162241	uncharacterized LOC100162241	8317.22	8218.25	10122	4436.27	3674.56	4280.36	4.87435e-07	-1.47485	1.94004e-11	0.359772	6.31208
MSTRG.16676	LOC100167084	lipid storage droplets surface-binding protein 1-like	7149.9	7247.83	8475.73	3404.63	2988.67	4230.79	3.18193e-05	-1.47454	1.26644e-09	0.359848	4.49731
MSTRG.19859	LOC100570013	uncharacterized LOC100570013	3235.02	3585.28	3144.9	1853.3	1442.73	1319.6	8.19362e-06	-1.47446	3.26114e-10	0.359868	5.08652
MSTRG.15864	LOC100162324	peptidyl-prolyl cis-trans isomerase FKBP2-like	4530.9	4028.55	4481.39	2085.94	1903.12	2064.37	8.40651e-10	-1.47436	3.34588e-14	0.359892	9.07538
MSTRG.7924	LOC100166301	NADH dehydrogenase [ubiquinone] 1 alpha subcomplex subunit 9, mitochondrial-like	10915.8	11387.8	13144	5570.14	5388.93	5512.09	3.46336e-10	-1.47379	1.37845e-14	0.360035	9.4605
MSTRG.13844	LOC100159654	tubulin beta-3 chain-like	9049.01	8693.8	12071.2	5058.12	4514.74	4335.01	6.90668e-05	-1.47086	2.74893e-09	0.360767	4.16073
MSTRG.5952	LOC100169209	RNA-binding protein lin-28-like	18780.4	17969	20805.5	9247.9	8396.26	9148.07	7.41766e-11	-1.46987	2.9523e-15	0.361015	10.1297
MSTRG.20519	LOC100163081	guanine nucleotide-binding protein subunit beta-like protein-like	86643.5	81797.5	112564	44775	42073.3	44300.8	5.15434e-06	-1.46907	2.05148e-10	0.361215	5.28783
MSTRG.6873	LOC100169315	amphiphysin-like	2006.76	2015.18	2017.84	843.114	972.217	992.276	1.05494e-06	-1.46791	4.19876e-11	0.361506	5.97677
MSTRG.18264	LOC100574970	uncharacterized LOC100574970	2037.02	1617.6	1826.63	896.707	839.304	816.736	5.60326e-05	-1.46762	2.23015e-09	0.361578	4.25156
MSTRG.10852	LOC100159762	ubiquitin-conjugating enyzme E2r-like	2150.43	2102.68	1950.62	1030.12	1133.12	721.256	0.00429792	-1.46733	1.71061e-07	0.361651	2.36674
MSTRG.24809	LOC100574469	heat shock 70 kDa protein cognate 4-like	78455	74675.9	104901	42375	35463.6	42862.4	0.000156873	-1.46514	6.24371e-09	0.3622	3.80445
MSTRG.993	LOC100164739	acetyl-CoA carboxylase-like	23404.5	24791.2	19965.3	10705.6	9810.32	11188	3.24682e-12	-1.46219	1.29227e-16	0.362942	11.4885
MSTRG.18099	LOC100169154	uncharacterized LOC100169154	6270.07	5846.16	6558.33	3207.27	2893.67	2623.98	5.68326e-09	-1.46176	2.26199e-13	0.36305	8.2454
MSTRG.17975	LOC100164058	s-adenosylmethionine synthase-like	31943.6	30927.3	31897.8	15851	12994.5	15432.5	2.71732e-11	-1.45931	1.08152e-15	0.363667	10.5659
MSTRG.15901	ACYPI53008	#N/A	3583.23	3068.98	4047.43	1708.79	1667.68	1637.32	7.69928e-06	-1.45927	3.06439e-10	0.363677	5.11355
MSTRG.22113	LOC100159728	facilitated trehalose transporter Tret1-like	11815.1	11947.5	11020	5463.22	5777.79	4994.99	1.83703e-13	-1.458	7.31157e-18	0.363997	12.7359
MSTRG.21323	LOC100161548	stAR-related lipid transfer protein 13-like	1226.92	1241.44	1365.58	579.909	615.104	606.712	0.000550135	-1.44955	2.18959e-08	0.366137	3.25953
MSTRG.17350	LOC100167609	uncharacterized LOC100167609	2257.89	2378.28	2550.5	1255.69	1069.39	1054.03	2.08844e-06	-1.44846	8.31218e-11	0.366411	5.68018
MSTRG.18043	Eff	effete	21422.6	19854.9	24704.9	11053.6	9969.66	10047	2.52493e-08	-1.44792	1.00495e-12	0.366551	7.59775
MSTRG.21035	Nlp	nucleoplasmin	79732.1	75154.6	90017.3	41115.7	36180.7	37973.7	1.58176e-09	-1.44787	6.29556e-14	0.366563	8.80086
MSTRG.20748	LOC100165366	serine/arginine-rich splicing factor 3-like	14869.8	12780.9	17851.5	7570.44	6806.17	7128.89	1.61152e-05	-1.4428	6.41401e-10	0.367854	4.79276
MSTRG.5513	LOC100168975	possible pseudogene or miscRNA, No KEGG entry	3451.99	2554.65	3452.72	1390.46	1298.69	1777.66	0.00947355	-1.44265	3.77057e-07	0.367891	2.02349
MSTRG.8029	Rpl15	ribosomal protein L15	115410	101861	139712	57843	55427.1	55464.6	2.59444e-06	-1.44224	1.03261e-10	0.367996	5.58596
MSTRG.8435	LOC100162040	uncharacterized LOC100162040	1382.23	1375.37	1138.55	648.884	565.094	617.216	0.000644247	-1.44141	2.56417e-08	0.368207	3.19095
MSTRG.8257	LOC100168641	uncharacterized LOC100168641	1961.08	2031.43	2387.97	1106.15	924.793	984.355	7.83139e-05	-1.44035	3.11697e-09	0.368478	4.10616
MSTRG.13562	LOC100167991	zinc transporter 2-like	2442.93	2428.06	2869.14	1234.22	1269.08	1158.13	3.74545e-06	-1.43694	1.49073e-10	0.36935	5.4265
MSTRG.13912	Rpl22	ribosomal protein L22	170857	154160	218472	91467.2	81057.9	85201.1	4.85987e-05	-1.4367	1.93428e-09	0.369411	4.31338
MSTRG.12616	Tomm20	translocase of outer mitochondrial membrane 20 homolog	10639.3	10400.1	11862.6	5536.19	5069.26	4963.25	3.30909e-10	-1.43576	1.31705e-14	0.369651	9.48029
MSTRG.10902	Tsr	twinstar	25476.4	25063.7	30597.3	14305.5	12011.7	12114.6	3.2951e-07	-1.43564	1.31148e-11	0.369682	6.48213
MSTRG.22053	LOC100163029	heterogeneous nuclear ribonucleoprotein H-like	13010.1	13013.1	14865.1	7625.37	5912.56	5826.36	1.73602e-06	-1.43454	6.90955e-11	0.369965	5.76044
MSTRG.7443	LOC100160513	#N/A	7192.88	6832.83	7402.54	3726.95	3152.66	3279.55	7.5831e-10	-1.43023	3.01815e-14	0.371071	9.12015
MSTRG.13920	LOC100159273	zinc finger protein 706-like	6680.21	6354.13	7892.12	3579.07	3267.63	3110.17	5.72105e-07	-1.42658	2.27703e-11	0.372013	6.24252
MSTRG.12914	LOC100166333	60S acidic ribosomal protein P1-like	37770	34182.4	47607.1	19176.7	18287.7	19573.9	2.04753e-05	-1.42338	8.14938e-10	0.372839	4.68877
MSTRG.9640	LOC100574365	elongation factor 1-alpha-like	396566	396328	499450	213258	195159	208305	3.45178e-07	-1.42066	1.37384e-11	0.373542	6.46196
MSTRG.12918	LOC100161763	ribosomal protein LP1-like	34507.4	31566.1	42017.3	17056.9	16534.9	18031.4	2.48536e-06	-1.41983	9.89197e-11	0.373757	5.60461
MSTRG.15114	LOC100165303	uncharacterized LOC100165303	13144.9	13040.2	15786.3	7219.7	6432.06	6428.2	1.05717e-07	-1.41451	4.20763e-12	0.375137	6.97586
MSTRG.8937	LOC100158694	sialin-like	1480.75	1969.7	1988.23	909.354	811.508	879.329	0.00211067	-1.4123	8.40067e-08	0.375712	2.67558
MSTRG.11733	LOC100158660	40S ribosomal protein S4-like	102314	103137	137970	58759.4	49835.7	56470.6	8.79959e-05	-1.40762	3.50233e-09	0.376934	4.05554
MSTRG.11495	LOC100165784	protein expanded-like	4683.34	4604.42	4473.93	2308.96	2062.67	2221.65	6.32617e-11	-1.40548	2.51788e-15	0.377493	10.1989
MSTRG.2490	LOC100164061	#N/A	4611.81	4625.04	5436.76	2664.14	2330.33	2054.7	1.02379e-05	-1.40541	4.07477e-10	0.377512	4.98979
MSTRG.12614	LOC100169366	uncharacterized LOC100169366	1408.66	1454.32	1431.2	662.445	643.89	759.324	0.000412242	-1.39787	1.64076e-08	0.379489	3.38485
MSTRG.5648	LOC100167271	possible pseudogene or miscRNA, No KEGG entry	68170.5	61034.7	87426.4	36287.5	32679.5	35772	0.00019452	-1.39648	7.7421e-09	0.379855	3.71104
MSTRG.13510	LOC100569280	uncharacterized LOC100569280	1989.73	2094.12	2454.15	1096.9	1082.46	979.011	9.52529e-05	-1.39369	3.79116e-09	0.38059	4.02112
MSTRG.10665	LOC100164438	ATP-binding cassette sub-family B member 7, mitochondrial-like	2310.38	2256.18	2204.52	1057.31	985.138	1225.29	5.73607e-06	-1.39026	2.28301e-10	0.381495	5.24139
MSTRG.63	LOC100168951	AP-2 complex subunit mu-1-like	1908.5	2058.42	2361.95	1199.81	937.914	935.841	0.00226922	-1.38292	9.03173e-08	0.383443	2.64412
MSTRG.2382	LOC100159476	uncharacterized LOC100159476	3440.39	3315.24	3451.99	1687.69	1785.75	1476.73	2.841e-07	-1.38197	1.13074e-11	0.383693	6.54653
MSTRG.18694	LOC100162923	anamorsin homolog	3956.63	3997.22	5269.38	2245.72	2012.77	2180.98	0.000291128	-1.38017	1.15872e-08	0.384172	3.53592
MSTRG.20055	LOC100165750	ATP-dependent RNA helicase p62-like	93808	90209.4	123374	53491.2	45939.3	50378.2	0.000149197	-1.37918	5.93818e-09	0.384436	3.82624
MSTRG.16994	LOC100165584	MAP kinase-interacting serine/threonine-protein kinase 1-like	4706.83	5317.63	4807.19	2495.21	2108.15	2593.87	3.30328e-08	-1.37732	1.31474e-12	0.384934	7.48105
MSTRG.24345	Tor	carotene dehydrogenase	9391.96	11827.4	7873.47	4647.52	3750.67	5668.3	0.0089299	-1.37684	3.55419e-07	0.385061	2.04915
MSTRG.19773	LOC100165557	uncharacterized LOC100165557	11008.9	11783.2	10843.4	5900.25	5344.98	5090.43	1.03631e-11	-1.37618	4.12462e-16	0.385238	10.9845
MSTRG.11330	LOC100160894	H/ACA ribonucleoprotein complex subunit 1-like	4306.84	4127.95	4893.49	2320.29	2020.52	2154.54	9.45091e-07	-1.37555	3.76156e-11	0.385406	6.02453
MSTRG.21061	LOC100160345	ubiquinone biosynthesis protein COQ9, mitochondrial-like	3430.34	3127.32	4009.68	1738.4	1663.07	1759.13	3.47643e-05	-1.37279	1.38365e-09	0.386144	4.45887
MSTRG.6233	LOC100161931	uncharacterized LOC100161931	15271.8	14388.9	20170.8	8615.14	7216.93	8585.83	0.00126397	-1.36846	5.03074e-08	0.387306	2.89826
MSTRG.8278	LOC100159016	uncharacterized LOC100159016	3348.75	2956.56	3911.57	1791.42	1593.87	1617.23	0.000239693	-1.36812	9.54e-09	0.387395	3.62035
MSTRG.4562	LOC100168014	hsp70-binding protein 1-like	4773.94	4859.56	5994.08	2767.39	2389.22	2493.35	1.92899e-05	-1.36757	7.67759e-10	0.387545	4.71467
MSTRG.11790	LOC100166874	ATP-binding cassette sub-family G member 4-like	2047.98	1644.72	2241.31	953.936	935.349	1016.94	0.00540347	-1.36753	2.15064e-07	0.387555	2.26733
MSTRG.17901	Rpl10	ribosomal protein L10 (EC:3.6.5.3)	98999.9	90173.7	124695	53737.9	46871.1	53623.9	0.000181314	-1.36187	7.21649e-09	0.389078	3.74157
MSTRG.7442	LOC100162537	Fanconi anemia group J protein homolog	2040.63	2095.14	2227.42	1068.47	941.119	1109.87	2.17454e-05	-1.36007	8.65489e-10	0.389564	4.66263
MSTRG.15206	LOC100160038	uncharacterized LOC100160038	1975.86	1892.09	2354.93	1157.13	905.68	998.501	0.0037262	-1.35777	1.48306e-07	0.390186	2.42873
MSTRG.16009	LOC100160929	u4/U6.U5 tri-snRNP-associated protein 2-like	5125.27	5169.67	6027.59	2868.63	2685.61	2472.23	1.01205e-06	-1.35614	4.02807e-11	0.390627	5.9948
MSTRG.11720	LOC100161110	uncharacterized protein LOC100161110	5837.98	6795.86	4669.44	2789.82	2367.53	3321.96	0.00167435	-1.34969	6.66407e-08	0.392376	2.77615
MSTRG.11445	LOC100167436	eukaryotic translation initiation factor 4H-like	16084.4	14753.1	18300.8	8717.69	8326.52	7226.78	5.00552e-06	-1.34836	1.99224e-10	0.392739	5.30055
MSTRG.21463	LOC100160689	fasciclin-2-like	2198.38	1994.76	2422.09	1214.07	1022.81	1030.26	0.00042668	-1.34815	1.69823e-08	0.392796	3.3699
MSTRG.17876	LOC100165913	far upstream element-binding protein 1-like	22549.1	22073.4	25402	12590.7	11383.8	10591.6	7.71958e-08	-1.34796	3.07247e-12	0.392847	7.11241
MSTRG.2871	LOC103311490	#N/A	4754.45	4678.03	5998.64	2810.04	2713.1	2107.67	0.00269057	-1.3472	1.07087e-07	0.393055	2.57016
MSTRG.12625	LOC100168678	putative zinc metalloproteinase T16A9.4-like	6572.91	5216.29	6698.49	3171.16	3201.03	2766.84	5.86199e-05	-1.34682	2.33313e-09	0.393157	4.23195
MSTRG.4496	LOC100164432	5'-nucleotidase	1918.08	2396.61	2384.17	1048.06	997.278	1260.54	0.00159076	-1.34497	6.3314e-08	0.393663	2.79839
MSTRG.14864	LOC100159178	lactase-phlorizin hydrolase-like	2625.76	3051.36	1974.95	1284.88	1123.43	1349.58	0.00415585	-1.34436	1.65407e-07	0.39383	2.38134
MSTRG.18156	LOC100167471	slit homolog 2 protein-like	3650.36	3779.91	4139.27	2107.15	1758.2	1856.32	2.40141e-06	-1.34343	9.55784e-11	0.394081	5.61953
MSTRG.16034	LOC100161587	mitochondrial-processing peptidase subunit beta-like	22771.1	22492.7	24694.8	11758	10934.3	11913.4	4.05815e-10	-1.34203	1.61518e-14	0.394464	9.39167
MSTRG.10897	LOC100160586	hydroxymethylglutaryl-CoA lyase, mitochondrial-like	4110.99	5282.98	4527.74	2264.4	1828.1	2775.73	0.00462386	-1.34154	1.84034e-07	0.394599	2.335
MSTRG.9323	Rps10b	ribosomal protein S10b	81919.5	72488.7	102468	42864.1	41702.3	42945.4	0.000205143	-1.34105	8.1649e-09	0.394732	3.68794
MSTRG.3441	LOC100163667	piwi-like protein 1-like	10630.3	9267.72	13771.6	5914.31	5210.77	5648.95	0.0047801	-1.33504	1.90253e-07	0.396382	2.32056
MSTRG.5603	LOC100569718	immunoglobulin superfamily containing leucine-rich repeat protein 2-like	2353.73	2445.28	2421.32	1196.41	1191.15	1192.63	2.76139e-07	-1.33502	1.09906e-11	0.396386	6.55887
MSTRG.2826	LOC100158783	uncharacterized LOC100158783	3230.46	3106.67	3035.29	1401.98	1625.69	1617.96	6.47925e-07	-1.33376	2.57881e-11	0.396732	6.18848
MSTRG.16407	LOC100162610	RNA-binding protein lark-like	14160.7	12978.6	15333.6	7926.78	6696.11	6518.24	1.65789e-06	-1.33132	6.59856e-11	0.397404	5.78044
MSTRG.13518	LOC100168156	uncharacterized LOC100168156	1227.32	1260.91	1238.91	653.275	592.549	608.327	0.00257767	-1.32755	1.02594e-07	0.398445	2.58877
MSTRG.13962	LOC100161294	B-cell receptor-associated protein 31-like	5972.58	5606.32	6441.16	3027.63	3077.82	2877.17	5.86974e-08	-1.32717	2.33622e-12	0.398549	7.23138
MSTRG.11863	LOC100164501	possible pseudogene or miscRNA, No KEGG entry	4863.94	4964.35	5668.01	3165.66	2462.08	2127.99	0.00385422	-1.32004	1.53402e-07	0.400524	2.41406
MSTRG.20954	LOC100169337	endochitinase-like	3335.52	2683.2	3229.37	1400.39	1530.69	1695.61	0.000464294	-1.31958	1.84794e-08	0.400653	3.33321
MSTRG.5751	LOC100160338	uncharacterized LOC100160338	5069.19	5208.55	5973.39	3042.06	2658.21	2435.22	1.81847e-05	-1.3191	7.2377e-10	0.400785	4.74029
MSTRG.7280	LOC100160531	RNA-binding protein squid-like	4875.17	4747.11	4920.3	2700.89	2323.65	2245.44	1.10834e-07	-1.31905	4.41131e-12	0.400799	6.95533
MSTRG.15814	LOC100159664	mitochondrial 2-oxoglutarate/malate carrier protein-like, active transporters; similar to 2-oxoglutarate carrier protein	6084.74	6000.75	6583.51	3029.64	3046.19	3289.22	2.35804e-08	-1.31262	9.38523e-13	0.402589	7.62745
MSTRG.22112	LOC100167207	retinol dehydrogenase 14-like	1408.63	1290.15	1398.28	747.599	659.995	650.723	0.00594814	-1.30958	2.36742e-07	0.403437	2.22562
MSTRG.10895	LOC100163004	uncharacterized LOC100163004	6056.91	5602	6678.54	3563.25	2921.79	2758.06	0.000109174	-1.30558	4.34524e-09	0.404557	3.96188
MSTRG.20795	LOC100164886	t-complex protein 1 subunit theta-like	17162.2	16759.8	19782	9542.97	8557.47	9005.86	3.10592e-07	-1.30217	1.23619e-11	0.405515	6.50781
MSTRG.17786	LOC100168358	uncharacterized LOC100168358	2635.39	2331.9	2634.15	1381.24	1311.5	1143.24	0.000141277	-1.30166	5.62296e-09	0.405659	3.84993
MSTRG.16086	LOC100159373	n-acetyllactosaminide beta-1,3-N-acetylglucosaminyltransferase-like	1828.69	1754.79	1761.78	977.695	931.706	784.835	0.000858205	-1.30056	3.41574e-08	0.405969	3.06641
MSTRG.6790	LOC100166344	#N/A	2443.82	2651.64	2511.28	1531.66	1183.54	1122.91	0.000963953	-1.2986	3.83663e-08	0.406521	3.01594
MSTRG.20869	LOC100169422	40S ribosomal protein S7-like	60613.1	56654.8	75419.2	33548.3	31077.6	33005.6	8.21525e-05	-1.2971	3.26975e-09	0.406944	4.08538
MSTRG.11026	LOC100168053	glypican-6-like	2867.52	2987.81	3261.73	1567.7	1502.52	1538.56	3.66727e-06	-1.29702	1.45961e-10	0.406967	5.43566
MSTRG.14121	LOC100165109	ribosomal protein L19e-like	93125.3	85475	101148	49032.1	44380	48132.4	9.29248e-08	-1.29673	3.6985e-12	0.407048	7.03187
MSTRG.9991	LOC100159627	uncharacterized LOC100159627	6036.24	5760.79	5995.4	3312.72	2814.73	2867.55	7.60104e-08	-1.29552	3.02529e-12	0.407389	7.11913
MSTRG.15630	LOC100161161	glucose-6-phosphate isomerase-like	9290.07	8299.35	9267.05	4494.36	4389.79	4710.89	2.11505e-08	-1.29393	8.4181e-13	0.407839	7.67468
MSTRG.8124	LOC100160046	B(0,+)-type amino acid transporter 1-like	13630.5	16944.4	13805.5	7113.7	6718.65	8576.93	1.02485e-05	-1.2914	4.079e-10	0.408554	4.98934
MSTRG.9192	LOC100169483	afadin-like	6265.83	6371.37	6985.88	3481.94	3233.27	3233.77	5.11441e-08	-1.29086	2.03558e-12	0.408706	7.2912
MSTRG.5015	LOC100569297	uncharacterized LOC100569297	13915.3	13968.3	10889.2	7215.23	6496.41	5916.37	2.0488e-06	-1.28571	8.15441e-11	0.410169	5.6885
MSTRG.9276	LOC100164683	proteasome subunit alpha type-1-like	12740.8	11411.7	15227.7	7226.57	6270.62	6579.13	0.000273269	-1.2845	1.08764e-08	0.410514	3.56341
MSTRG.11340	LOC100165703	uncharacterized LOC100165703	4861.81	5072.43	5880.62	2800.07	2510.93	2781.98	1.46642e-05	-1.27329	5.83651e-10	0.413716	4.83374
MSTRG.19279	LOC100161003	uncharacterized LOC100161003	3859.4	3867.47	4098.45	2204.15	1862.13	1988.64	2.3019e-06	-1.27005	9.1618e-11	0.414644	5.63791
MSTRG.20534	LOC100160456	uncharacterized LOC100160456	3232.73	3643.65	3161.89	1947.54	1659.41	1521.75	4.36049e-05	-1.26947	1.73552e-09	0.414812	4.36046
MSTRG.7259	LOC100169518	transportin-1-like	3658.33	4108.34	3772.32	2153.54	2001.71	1744.21	4.74129e-06	-1.26944	1.88708e-10	0.414821	5.3241
MSTRG.17155	LOC103308803	#N/A	4125.66	4265.22	5302.7	2440.81	2258.37	2328.32	0.000312801	-1.26931	1.24498e-08	0.414858	3.50473
MSTRG.7606	LOC100168333	transcription elongation factor SPT5-like	8101.47	7732	9654.85	4506.94	4148.32	4452.48	3.05751e-05	-1.26461	1.21692e-09	0.416212	4.51463
MSTRG.15350	LOC103310693	#N/A	2281.89	2042.31	2261.91	1222.93	1065.51	1096.39	0.000196015	-1.2628	7.80158e-09	0.416735	3.70771
MSTRG.17348	LOC100160760	derlin-2-like	1623.25	1657.53	1777.32	899.532	845.263	853.751	0.000936068	-1.26278	3.72564e-08	0.416739	3.02869
MSTRG.9569	LOC100160321	uncharacterized LOC100160321	1557.07	1601.32	1631.16	909.408	809.265	746.033	0.00409416	-1.25817	1.62952e-07	0.418075	2.38784
MSTRG.17962	Rpl24	ribosomal protein L24	66149.8	60996.9	79636.8	36757.6	34659.7	35581.4	6.78956e-05	-1.25273	2.70231e-09	0.419653	4.16816
MSTRG.9088	LOC100165363	acyl-CoA synthetase family member 2, mitochondrial-like	6033.28	4939.6	4995.48	2772.22	2610.79	2874.44	6.10954e-06	-1.24677	2.43166e-10	0.421389	5.21399
MSTRG.16922	LOC100166273	rab11 family-interacting protein 4A-like	2111.72	2021.75	2254.08	1195.02	1102.44	1014.35	0.000519457	-1.2448	2.06749e-08	0.421967	3.28445
MSTRG.16752	LOC100161095	sialin-like	4033.25	4023.15	4627.47	2137.66	2165.7	2274.46	1.11805e-05	-1.24456	4.44995e-10	0.422035	4.95154
MSTRG.2483	LOC115032976	#N/A	1836.52	1674.88	1961.08	1026.54	883.592	933.229	0.00545811	-1.24158	2.17238e-07	0.42291	2.26296
MSTRG.10932	LOC100168202	protein disulfide-isomerase A6-like	9729.52	9414.59	11143.9	5569.72	5210.93	4980.07	4.6031e-06	-1.23867	1.83208e-10	0.423763	5.33695
MSTRG.12761	LOC100167347	abhydrolase domain-containing protein FAM108C1-like	2657.21	2758.66	2688.02	1588.62	1364.24	1257.08	0.00014763	-1.23776	5.87583e-09	0.424031	3.83082
MSTRG.20599	LOC100162419	probable ATP-dependent RNA helicase DDX5-like	9343.49	9382.14	11396.8	6027.98	4954.03	4737.46	0.00105108	-1.23408	4.18339e-08	0.425115	2.97837
MSTRG.2386	LOC100573660	uncharacterized LOC100573660	2708.59	2774.88	2735.63	1710.94	1393.31	1177.61	0.00911964	-1.23241	3.62971e-07	0.425607	2.04002
MSTRG.9467	Su(var)3-9	suppressor of variegation 3-9	3436.7	3388.68	3155.13	2014.75	1782.94	1402.66	0.00365717	-1.23014	1.45559e-07	0.426277	2.43685
MSTRG.1993	LOC100166892	5'-nucleotidase	4236.59	5463.48	4719.29	2535.5	2552.83	2418.25	6.00882e-06	-1.23012	2.39157e-10	0.426282	5.22121
MSTRG.12615	LOC100160481	laminin subunit gamma-1-like	18073.1	18597.9	17218.2	9895.23	9125.18	9081.72	3.96946e-10	-1.22788	1.57988e-14	0.426943	9.40127
MSTRG.20563	LOC100167151	uncharacterized LOC100167151	11025	10546	12285.1	6155.35	5869.14	5682.6	1.10945e-06	-1.22765	4.41571e-11	0.427013	5.95489
MSTRG.10943	LOC100159230	lipoma HMGIC fusion partner-like 2 protein-like	3692.56	3104.62	3581.16	1858.65	1837.81	1730.96	8.3037e-05	-1.22716	3.30495e-09	0.427156	4.08073
MSTRG.19745	LOC100165792	lysosomal Pro-X carboxypeptidase-like	2461.2	2710.02	2518.08	1456.09	1389.29	1168.72	0.000257522	-1.22593	1.02496e-08	0.427522	3.58919
MSTRG.21521	LOC100163362	serine/threonine-protein phosphatase PP1-alpha catalytic subunit-like	12384.7	12700.8	13151.9	7151.36	6441.25	6407.03	2.32974e-08	-1.22483	9.2726e-13	0.427847	7.63269
MSTRG.3280	LOC100159935	excitatory amino acid transporter 1-like	4222.82	5170.58	3771.66	2470.97	2138.82	2253.23	0.000118685	-1.22311	4.72377e-09	0.428359	3.92561
MSTRG.18223	LOC100160745	alpha-tocopherol transfer protein-like	4247.7	4932.89	4307.57	2391.5	2354.11	2309.81	1.6076e-07	-1.21991	6.39842e-12	0.429311	6.79382
MSTRG.6964	LOC100169457	tubulin alpha chain-like	273329	247986	305774	159073	138096	138185	4.5633e-05	-1.21584	1.81624e-09	0.430522	4.34072
MSTRG.13851	Dap	death-associated protein	6885.89	7696.3	9655.9	3970.04	4350.43	4450.75	0.00825415	-1.21451	3.28523e-07	0.430919	2.08333
MSTRG.21168	LOC100168069	nostrin-like	2915.63	2823.57	2687	1507.45	1409.7	1509.34	5.56988e-06	-1.2132	2.21687e-10	0.431312	5.25415
MSTRG.7549	LOC100144869	ATP synthase c-subunit-like	119035	119124	131691	63644.1	63840.5	67384.6	6.60499e-08	-1.21062	2.62885e-12	0.432082	7.18013
MSTRG.20464	LOC100162767	discoidin domain-containing receptor 2-like	2360.35	2283.22	2352.48	1376.79	1235.78	1072.64	0.0013213	-1.20938	5.25891e-08	0.432454	2.879
MSTRG.12756	LOC100163250	uncharacterized MFS-type transporter C19orf28-like	1890.41	1734.3	1774.22	969.229	878.774	998.453	0.00186524	-1.20729	7.42384e-08	0.43308	2.72927
MSTRG.6989	LOC100160380	UDP-glucuronosyltransferase 2B10-like	6354.17	7423.77	5046.77	3276.39	3005.59	3600.73	0.00149042	-1.20615	5.93203e-08	0.433424	2.82669
MSTRG.21949	VhaAC39	vacuolar H[+]-ATPase C39 subunit, active transporters; similar to vacuolar ATP synthase	7500.25	7529.93	9110.74	4333.45	4187.08	4254.66	6.26826e-05	-1.20428	2.49483e-09	0.433986	4.20285
MSTRG.5594	LOC100160640	coiled-coil-helix-coiled-coil-helix domain containing 2-like	18211.6	17040.9	21156.6	9754.43	9889.32	10220	3.81481e-05	-1.20353	1.51833e-09	0.434211	4.41853
MSTRG.9764	LOC100568670	plexin-A3-like	10698.6	9375.63	8125.34	4451.85	5021.89	5388.68	0.000112466	-1.20298	4.47625e-09	0.434376	3.94898
MSTRG.8852	LOC100168765	60S ribosomal protein L3-like	125759	118173	151356	72835	67790.9	68832.8	0.00014923	-1.20289	5.93949e-09	0.434403	3.82615
MSTRG.5044	Mrpl2	mitochondrial ribosomal protein L2	3771.54	3534.7	4064.38	2134.99	2016	1866.82	9.17711e-05	-1.2028	3.65258e-09	0.43443	4.03729
MSTRG.5848	LOC100169222	bifunctional heparan sulfate N-deacetylase/N-sulfotransferase-like	4665.44	4547.28	5420.82	2596.56	2607.44	2543.69	4.76165e-05	-1.20268	1.89518e-09	0.434466	4.32224
MSTRG.16398	LOC100168792	MOXD1 homolog 1-like	6685.2	6396.24	7843.35	3701.46	3710.03	3688.63	7.3499e-05	-1.1992	2.92533e-09	0.435515	4.13372
MSTRG.9771	LOC100159070	protein yellow-like	2901.83	3366.01	3616.5	1787.24	1814.1	1644.46	0.000774026	-1.19586	3.0807e-08	0.436526	3.11124
MSTRG.7777	LOC100168260	nucleolysin TIAR-like	7530.65	7225.15	8532.59	4621.77	4074.97	3689.1	0.000390453	-1.19345	1.55404e-08	0.437255	3.40843
MSTRG.10268	LOC100169614	mediator of RNA polymerase II transcription subunit 12-like	5268.88	4851.94	4586.28	2907.53	2624.5	2270.15	7.35542e-05	-1.19305	2.92753e-09	0.437378	4.13339
MSTRG.9724	LOC100165582	3-hydroxyisobutyryl-CoA hydrolase, mitochondrial-like	4068.72	4382.96	4569.16	2277.34	2207.73	2435.94	7.07984e-06	-1.19144	2.81785e-10	0.437865	5.14998
MSTRG.21492	LOC100160056	scavenger receptor class B member 1-like	2601.6	2913.14	2388.98	1320.03	1288.17	1579.19	0.00124835	-1.19097	4.96857e-08	0.43801	2.90366
MSTRG.5124	Ak2	adenylate kinase 2, mitochondrial (EC:2.7.4.3)	5538.81	5064.93	5632.55	2882.61	2940.87	2817.18	2.01554e-06	-1.18971	8.02206e-11	0.438392	5.69561
MSTRG.16950	LOC100160284	NADPH--cytochrome P450 reductase-like	6337.93	5814.93	6867.03	3431.58	3550.7	3159.55	4.65378e-05	-1.18746	1.85225e-09	0.439076	4.33219
MSTRG.16833	LOC100169568	uncharacterized protein C19orf52-like	2650.51	2336.28	2759.16	1485.06	1353.38	1293.22	0.00216409	-1.18738	8.61331e-08	0.4391	2.66472
MSTRG.18477	LOC100167359	gelsolin-like	9213.9	10739.3	9359.17	4933.04	4385	6257.82	0.00322882	-1.18703	1.2851e-07	0.439206	2.49096
MSTRG.20817	LOC100169564	SNW domain-containing protein 1-like	6449.53	6631.77	6369.97	3863.29	3077.93	3447.39	7.8207e-06	-1.1796	3.11272e-10	0.441473	5.10675
MSTRG.18208	LOC100159541	acyl-CoA synthetase short-chain family member 3, mitochondrial-like	4140.58	3547.73	4069.24	1991	2079.92	2222.36	0.000198519	-1.17811	7.90126e-09	0.441931	3.7022
MSTRG.16629	LOC100160988	t-complex protein 1 subunit theta-like	9351.53	9325.99	12126.1	6015.79	5219.55	5343.77	0.00727562	-1.17157	2.89577e-07	0.443939	2.13813
MSTRG.13796	LOC100162313	uncharacterized LOC100162313	9293.08	10228.2	9256.01	5693.28	4876.14	4859.34	7.64545e-07	-1.17002	3.04297e-11	0.444417	6.1166
MSTRG.6078	LOC100168154	protein neuralized-like	2385.6	2490.67	2417.37	1493.7	1269.35	1152.06	0.00277356	-1.16987	1.1039e-07	0.444462	2.55696
MSTRG.6329	LOC100144902	ribosomal protein S28e-like	14851.7	13200.2	14698	7372.02	7436.52	8191.35	3.70567e-06	-1.16683	1.47489e-10	0.4454	5.43113
MSTRG.2234	LOC100167598	cytochrome c1-like	10262.9	10662.7	11631.4	5810.13	5764.68	5958.66	1.05802e-06	-1.1651	4.21102e-11	0.445933	5.97551
MSTRG.16312	LOC100160385	multiple epidermal growth factor-like domains protein 10-like	3303.66	3415.79	3763.3	2040.79	1821.56	1786.5	0.000333468	-1.1639	1.32724e-08	0.446303	3.47695
MSTRG.9450	LOC100165630	protein notum homolog	3023.08	2577.19	2645.81	1662.74	1486.31	1305.75	0.00677983	-1.15708	2.69844e-07	0.44842	2.16878
MSTRG.13750	LOC100168472	uncharacterized LOC100168472	17855.1	17786.5	22013	11103.4	10220.2	9902.46	0.000666461	-1.15684	2.65258e-08	0.448493	3.17623
MSTRG.8048	LOC100167255	fatty acid synthase-like	65050.7	74294.3	69416.7	37522.8	36391	39096.2	4.67666e-08	-1.1503	1.86136e-12	0.450533	7.33006
MSTRG.12496	LOC100165595	uncharacterized LOC100165595	6002.36	6753.93	7464.33	3996.73	3571.42	3407.58	0.000719664	-1.14969	2.86433e-08	0.450721	3.14287
MSTRG.2853	LOC100573625	titin-like	4576.28	4539.67	4938.81	2616.48	2555.54	2473.15	8.56187e-06	-1.14418	3.40771e-10	0.452448	5.06743
MSTRG.21770	LOC100166007	elongation of very long chain fatty acids protein AAEL008004-like	6857.36	7083.53	7080.59	3752	3647.04	4024.44	6.59374e-07	-1.14373	2.62438e-11	0.452588	6.18087
MSTRG.16071	LOC100573509	uncharacterized LOC100573509	2382.25	2464.76	2478.49	1505.76	1228.69	1250.03	0.00282855	-1.14319	1.12579e-07	0.452757	2.54844
MSTRG.7994	LOC100159411	ADP/ATP translocase 3-like	229872	221001	254146	126065	121028	136953	1.43944e-05	-1.14223	5.72912e-10	0.453057	4.84181
MSTRG.18471	LOC100159045	ribosomal protein L23-like	108282	99339.9	125759	62379.6	57543.4	62135.1	0.000470681	-1.13967	1.87336e-08	0.453864	3.32727
MSTRG.5532	LOC100160397	homeobox protein prospero-like	2522.89	2683.99	2338.72	1457.41	1351.31	1307.78	0.000229747	-1.13271	9.14414e-09	0.456059	3.63875
MSTRG.20544	LOC100162733	Y-box protein Ct-p40-like	34558.8	34115.3	39720.3	21489.6	19210.6	18910.4	9.18664e-05	-1.12342	3.65637e-09	0.459005	4.03684
MSTRG.7855	LOC100161401	heterogeneous nuclear ribonucleoprotein 87F-like	9802.42	9042.86	10801.9	5823.56	5449.08	5077.21	0.000313223	-1.11806	1.24666e-08	0.460713	3.50415
MSTRG.8651	LOC100167340	uncharacterized LOC100167340	26749.4	26790.6	31694.3	17253	14653.6	15143.2	0.000702785	-1.11626	2.79715e-08	0.461288	3.15318
MSTRG.19505	LOC100164603	RNA polymerase II elongation factor ELL-like	2529.61	2733.84	2749.41	1540.53	1423.05	1452.12	0.000431891	-1.11539	1.71897e-08	0.461567	3.36463
MSTRG.22068	LOC100167520	double-strand-break repair protein rad21 homolog	6474.58	6497.83	7302.46	4297.16	3509.7	3397.99	0.00308437	-1.11265	1.22761e-07	0.462443	2.51083
MSTRG.9702	LOC100161993	splicing factor 3B subunit 1-like	7280.64	7604.4	7966.56	4819.36	3513.26	4290.19	0.00541985	-1.11176	2.15716e-07	0.462729	2.26601
MSTRG.19047	LOC100163703	CAD protein-like	10635.9	10476.8	11089	6627.56	5888.15	5300.41	0.000104181	-1.1085	4.14649e-09	0.463777	3.98221
MSTRG.19857	LOC100162331	dihydrolipoyllysine-residue succinyltransferase component of 2-oxoglutarate dehydrogenase complex, mitochondrial-like	9324.35	9214.67	10609.8	5323.63	5512.41	5318.07	5.5268e-05	-1.10658	2.19972e-09	0.464394	4.25753
MSTRG.17629	LOC100165462	3-hydroxy-3-methylglutaryl-coenzyme A reductase	4052.68	4030.73	4475.11	2572.09	2189.41	2202.07	0.00112478	-1.10512	4.47672e-08	0.464863	2.94893
MSTRG.5621	LOC100165216	THO complex subunit 4	17424.6	16666.9	15854.2	9729.08	9151.33	8809.09	3.93102e-07	-1.10096	1.56458e-11	0.466205	6.4055
MSTRG.9597	Rps18	ribosomal protein S18	78799.6	73947.5	86694.6	45403.1	42449.8	45793.1	5.94649e-05	-1.09218	2.36676e-09	0.469052	4.22574
MSTRG.9052	LOC100159585	polyadenylate-binding protein 1-like	110572	104474	108120	62736.4	58214.3	59416.2	4.11729e-07	-1.08911	1.63872e-11	0.47005	6.38539
MSTRG.18755	LOC100160927	malectin-like	5387.93	4976.33	5974.46	3360.68	2871.45	2915.25	0.00448266	-1.08688	1.78414e-07	0.470778	2.34846
MSTRG.11021	LOC100164483	division abnormally delayed protein-like	2373.24	2537.14	2331.35	1250.27	1331.2	1458.33	0.00236058	-1.08681	9.39533e-08	0.470802	2.62698
MSTRG.16372	LOC100162475	probable citrate synthase 1, mitochondrial-like	49977.3	51413.5	53349.9	29795.9	28004.1	28691.2	5.83069e-07	-1.08637	2.32067e-11	0.470946	6.23428
MSTRG.7852	LOC100162512	heterogeneous nuclear ribonucleoprotein 87F-like	47085.2	45308.8	50668	29005.5	26638.2	24428.3	8.3851e-05	-1.0856	3.33736e-09	0.471196	4.07649
MSTRG.16007	LOC100163696	uncharacterized LOC100163696	9493.07	9816.53	10290.8	5462.1	5221.82	5875.06	1.57655e-05	-1.08468	6.27481e-10	0.471496	4.80229
MSTRG.5234	LOC100167115	uncharacterized LOC100167115	7047.84	8311	6330.21	3926.83	3843.1	4316.65	0.000309982	-1.08467	1.23376e-08	0.471499	3.50866
MSTRG.11815	LOC100167023	NADH dehydrogenase [ubiquinone] 1 alpha subcomplex subunit 8-like	6843.71	6283.96	7633.2	3970.67	3825.32	3851.43	0.000998133	-1.08248	3.97267e-08	0.472218	3.00081
MSTRG.12307	LOC100163850	malignant fibrous histiocytoma-amplified sequence 1-like	4028.79	4432.64	4049.72	2253.01	2183.98	2569.21	0.000256541	-1.07892	1.02106e-08	0.473384	3.59084
MSTRG.5497	LOC100163072	dolichyl-diphosphooligosaccharide--protein glycosyltransferase subunit STT3B-like	11001.2	10492	12249.2	6590.23	6351.03	6015.22	0.000208156	-1.07869	8.28484e-09	0.473458	3.68161
MSTRG.9167	LOC103309182	#N/A	4820.98	4710.32	4425.21	2801.89	2457.39	2567.89	2.8558e-05	-1.07719	1.13664e-09	0.473952	4.54427
MSTRG.464	LOC100162936	laminin subunit alpha-1-like	5541.55	5119.98	5392.97	3426.6	2767.74	2822.76	0.00150716	-1.07715	5.99865e-08	0.473964	2.82184
MSTRG.21318	LOC100164129	uncharacterized LOC100164129	6025.02	6294.55	4749.62	3004.14	3534.8	3024.59	0.00515383	-1.07292	2.05128e-07	0.475354	2.28787
MSTRG.13074	LOC100167414	cytoplasmic aconitate hydratase-like	14372.3	15408.9	12980.6	8237.66	7633.92	8144.56	1.96949e-06	-1.07099	7.83876e-11	0.475993	5.70565
MSTRG.7320	LOC100160659	6-phosphofructokinase-like	4175.85	4265.14	3782.28	2403.56	2268.31	2209.17	3.98909e-05	-1.06777	1.5877e-09	0.477057	4.39913
MSTRG.5447	LOC100164379	uncharacterized LOC100164379	3642.35	3693.48	3768.66	2221.93	1990.99	2051.42	0.00021845	-1.06703	8.69454e-09	0.477302	3.66065
MSTRG.6007	LOC100160853	ribonuclease UK114-like	10655.5	11274.3	9883.47	5882.27	5193.07	6866.78	0.00171529	-1.06309	6.82702e-08	0.478606	2.76566
MSTRG.8623	LOC100164473	fat-like cadherin-related tumor suppressor homolog	2560.19	2943.37	2380.81	1479.23	1433.23	1530.81	0.00284731	-1.06275	1.13326e-07	0.47872	2.54556
MSTRG.17352	LOC100161670	AH receptor-interacting protein-like	5380.38	5205.43	5747.75	3359.34	3099.87	2784.45	0.0012919	-1.06264	5.14188e-08	0.478755	2.88877
MSTRG.11003	LOC100162105	pyruvate carboxylase, mitochondrial	16405.7	18311.6	15782.1	8971.56	9644.47	9964.1	6.6687e-06	-1.05527	2.65421e-10	0.481206	5.17596
MSTRG.18720	LOC100161573	uncharacterized LOC100161573	9437.14	9564.72	8854.23	5704.34	4730.49	5411.71	7.00657e-05	-1.047	2.78868e-09	0.483972	4.15449
MSTRG.5797	LOC100165315	ribosomal protein L13-like	93487.2	86838.8	103178	55406.8	52906.3	53597.4	0.00030856	-1.04479	1.2281e-08	0.484715	3.51066
MSTRG.8261	LOC100158772	uncharacterized LOC100158772	3569.63	3576.8	3522.12	2025.5	1976.12	2090.11	0.000181939	-1.0401	7.24137e-09	0.486295	3.74007
MSTRG.5918	LOC100159862	aminopeptidase N-like	4865.26	4663.9	3639.76	2591.07	2534.58	2390.94	0.0074241	-1.0353	2.95487e-07	0.487914	2.12936
MSTRG.8107	LOC100163008	cytochrome b-c1 complex subunit 2, mitochondrial-like	20650	19838.7	22395.1	12092.2	11925.2	12084.6	8.70107e-05	-1.03252	3.46311e-09	0.488855	4.06043
MSTRG.12582	Mir277	microRNA mir-277	3278.28	3168.27	2702.22	1788.81	1649.52	1797.21	0.00405174	-1.03204	1.61263e-07	0.489019	2.39236
MSTRG.17524	LOC100167046	probable phosphoglycerate kinase-like	25102.1	23949.5	26047.5	14505.2	14259.6	14343.7	1.68098e-05	-1.03181	6.69045e-10	0.489095	4.77444
MSTRG.6849	LOC100168351	TAR DNA-binding protein 43-like	5975.76	5743.56	6402.51	3759.42	3553.41	3125.29	0.00383626	-1.02582	1.52687e-07	0.491133	2.41609
MSTRG.7204	LOC100163468	uncharacterized protein LOC100163468	8076.52	7922.22	9415.07	5244.97	4776.5	4650.1	0.00675679	-1.02267	2.68927e-07	0.492205	2.17026
MSTRG.6887	LOC100160429	synaptic vesicle membrane protein VAT-1 homolog-like	16733.9	16960.8	18956.7	10397.5	10228.9	9749.04	0.000257991	-1.02246	1.02683e-08	0.492278	3.58839
MSTRG.20992	LOC100168538	polyribonucleotide nucleotidyltransferase 1, mitochondrial-like	3262.28	3066.76	3245.69	1923.37	1770.55	1831.65	0.00237263	-1.02059	9.44329e-08	0.492915	2.62477
MSTRG.20047	LOC103308723	#N/A	8985.11	8767.28	9988.3	5727.19	5194.31	5124.9	0.00123858	-1.01779	4.92967e-08	0.493871	2.90708
MSTRG.14306	LOC100167791	6-phosphogluconate dehydrogenase, decarboxylating	28517.8	31414.6	24584.2	15701.5	15909.7	17051	0.000136891	-1.0171	5.44839e-09	0.494108	3.86363
MSTRG.17937	LOC100161944	Y+L amino acid transporter 2-like, amino acid transporter; AA transmembrane transporter	5972.44	5631.18	5912.7	3418.2	3384.89	3381.21	0.000133973	-1.00433	5.33225e-09	0.498502	3.87298
MSTRG.9379	LOC100167382	60S ribosomal protein L17-like	111130	101001	124725	65543.4	62978.6	67944.2	0.00645292	-1.00185	2.56833e-07	0.499358	2.19024
MSTRG.8560	LOC100162342	ras suppressor protein 1-like	2120.22	2408.92	2064.57	3359.69	3421.59	3514.35	0.000180578	1.05708	7.1872e-09	2.08072	3.74333
MSTRG.9484	LOC100163378	uncharacterized LOC100163378	1524.26	1650.3	1415.51	2386.52	2443.23	2352.14	0.000969095	1.06174	3.8571e-08	2.08745	3.01363
MSTRG.14216	LOC100167383	juvenile hormone binding protein-like	1805.32	1734.65	1567.48	2859.11	2532.14	2611.93	0.00159375	1.06279	6.34329e-08	2.08896	2.79758
MSTRG.16494	LOC100167550	uncharacterized LOC100167550	2872.45	2808.84	3134.09	4485.12	4720.27	4718.11	0.00018755	1.0744	7.46469e-09	2.10584	3.72688
MSTRG.2696	LOC100158981	uncharacterized LOC100158981	1718.29	1948.53	1499.71	2763.37	2691.17	2732.59	0.00146382	1.09027	5.82615e-08	2.12913	2.83451
MSTRG.16809	LOC100159287	uncharacterized LOC100159287	1285.5	1380.11	1076.18	2119.48	1990.05	1868.74	0.00814643	1.10723	3.24236e-07	2.15432	2.08903
MSTRG.21450	LOC100162777	alpha-crystallin B chain-like	2369.35	2591.64	2840.93	4558.5	4091.58	3925.91	0.00113893	1.11625	4.53304e-08	2.16783	2.9435
MSTRG.16870	LOC100161061	uncharacterized LOC100161061	1662.29	1828.58	1315.53	2550.87	2544.44	2706.29	0.00449928	1.14235	1.79076e-07	2.2074	2.34686
MSTRG.8024	LOC100158788	dolichyl-diphosphooligosaccharide--protein glycosyltransferase subunit DAD1-like	2213.86	2561.29	2034.23	3199.08	3968.88	3957.41	0.00194189	1.15387	7.72892e-08	2.22511	2.71178
MSTRG.22034	LOC100159245	uncharacterized LOC100159245	1777.72	2107.38	1460.87	2937.84	2844.03	3150.08	0.00188926	1.20352	7.51946e-08	2.303	2.72371
MSTRG.20268	#N/A	#N/A	3628.1	4197.38	2927.08	5498.2	6082.57	6408.31	0.000423723	1.20606	1.68646e-08	2.30706	3.37292
MSTRG.2802	#N/A	#N/A	897.635	1022.46	938.489	1500.32	1781.83	1522.61	0.00787784	1.20928	3.13546e-07	2.31222	2.10359
MSTRG.20259	LOC100165692	phosphatidylinositol synthase-like	931.747	900.381	840.88	1409.37	1605.86	1507.78	0.00309956	1.22267	1.23365e-07	2.33379	2.5087
MSTRG.19081	LOC100167482	TATA element modulatory factor-like	1492.39	1664.36	1341.33	2443.23	2535.63	2626.63	2.70023e-05	1.22462	1.07472e-09	2.33694	4.5686
MSTRG.8878	LOC100168295	MPA13 allergen-like	3816.81	4073.24	4248.65	6322.2	7575.73	6795.84	2.91207e-06	1.235	1.15903e-10	2.35381	5.5358
MSTRG.13610	LOC100165532	uncharacterized LOC100165532	5180.61	5731.93	3665.34	7997.02	8143.53	8727.32	0.00151469	1.24825	6.02862e-08	2.37553	2.81968
MSTRG.11058	LOC100166123	uncharacterized LOC100166123	1025.47	1146.73	900.927	1742.62	1700.11	1861.63	0.000397234	1.2684	1.58103e-08	2.40894	3.40095
MSTRG.22206	#N/A	#N/A	3392.79	3319.93	2313.51	4596.99	5371.3	5647.77	0.00273365	1.27621	1.08802e-07	2.42203	2.56326
MSTRG.17785	LOC100570328	uncharacterized LOC100570328	1787.9	1830.79	1302.32	2735.17	2803.73	3046.93	0.000459595	1.29328	1.82923e-08	2.45084	3.33762
MSTRG.2203	LOC100167913	transmembrane emp24 domain-containing protein bai-like	1202.35	1312.07	1003.34	1953.08	2155.93	2094.65	4.83155e-05	1.31412	1.92301e-09	2.4865	4.31591
MSTRG.9813	LOC100161831	cytosolic carboxypeptidase-like protein 5-like	976.438	1145.65	891.202	1677.15	1933.13	1724.69	0.000355498	1.32195	1.41492e-08	2.50003	3.44916
MSTRG.6799	LOC100169592	kinesin-like protein unc-104	901.164	1066.77	855.937	1777.45	1678.52	1554.19	0.000290552	1.32469	1.15643e-08	2.50479	3.53678
MSTRG.826	LOC100166893	ras-related protein Rap-1A-like	1958.28	2886.52	1903.81	3920.93	4310.31	3937.93	0.000772129	1.36345	3.07315e-08	2.57299	3.11231
MSTRG.19498	LOC100162523	ADP-ribosylation factor-binding protein GGA1-like	1103.04	1308.78	810.749	1964.85	1902.53	1945.55	0.00556705	1.36519	2.21574e-07	2.5761	2.25437
MSTRG.7506	LOC100158952	trafficking protein particle complex subunit 2-like protein-like	1130.41	1304.48	905.742	1987.7	2019.84	2064.8	9.81324e-05	1.37898	3.90577e-09	2.60085	4.00819
MSTRG.19692	LOC100163233	septin-4-like	849.734	807.505	875.213	1596.9	1442.08	1612.72	0.00010561	1.38936	4.20337e-09	2.61963	3.9763
MSTRG.18993	LOC100163560	uncharacterized LOC100163560	3514.52	4093.82	5017.77	7749.5	8727.7	6764.46	0.00137367	1.38954	5.46734e-08	2.61996	2.86212
MSTRG.10948	Tmem35	transmembrane protein 35	1669.29	1846.99	1195.13	2700.02	2845.71	3060.97	0.000528842	1.39107	2.10484e-08	2.62273	3.27667
MSTRG.11354	LOC100159552	RING finger protein 181-like	1343.89	1353.15	890.184	2211.26	2297.3	2090.93	0.00153036	1.40564	6.09098e-08	2.64936	2.81521
MSTRG.2613	LOC115033156	#N/A	1060.8	1214.82	976.292	1946.07	2191.82	1874.97	5.3057e-06	1.41104	2.11172e-10	2.65928	5.27526
MSTRG.12197	#N/A	#N/A	533.488	626.943	505.569	946.98	1005.74	1131.19	0.00987469	1.41408	3.93022e-07	2.66489	2.00548
MSTRG.12961	LOC100165451	uncharacterized LOC100165451	809.63	965.146	642.225	1368.77	1508.96	1597.27	0.00578763	1.41954	2.30353e-07	2.67501	2.2375
MSTRG.11454	LOC100168433	uncharacterized LOC100168433	829.244	904.714	779.089	1592.86	1530.83	1562.27	5.70089e-06	1.42688	2.26901e-10	2.68864	5.24406
MSTRG.2077	LOC100574822	ectoderm-neural cortex protein 2-like	1066.55	1218.06	913.089	2225	2170.05	1588.66	0.0020527	1.43638	8.16995e-08	2.70641	2.68767
MSTRG.1684	LOC100572931	coiled-coil domain-containing protein 22 homolog	640.793	834.388	590.967	1293.79	1256.91	1317.35	0.0024747	1.44069	9.84953e-08	2.7145	2.60648
MSTRG.9978	LOC100160449	transmembrane protein adipocyte-associated 1 homolog	1583.74	1974.49	1317.03	2988.09	3315.25	2855.19	3.32811e-05	1.44859	1.32462e-09	2.72941	4.4778
MSTRG.11498	#N/A	#N/A	952.442	1128.37	887.418	1869.18	1820.69	1927.09	1.20584e-06	1.45996	4.79935e-11	2.751	5.91871
MSTRG.6106	LOC100162789	guanine nucleotide-binding protein subunit beta-5-like	1099.68	1031.17	818.204	1735.47	2073.9	1777.58	9.21611e-05	1.46229	3.66811e-09	2.75545	4.03545
MSTRG.25	CYTB	cytochrome b	16875.3	20497.1	13021.7	29468.8	33287.5	33245.6	2.51011e-06	1.4786	9.99049e-11	2.78677	5.60031
MSTRG.21248	LOC100165884	chorion peroxidase-like	514.343	448.777	514.791	1035.2	934.543	918.443	0.00273261	1.51822	1.08761e-07	2.86437	2.56342
MSTRG.1683	LOC100164644	uncharacterized LOC100164644	1673.94	2066.36	1330.52	3149.75	3369.35	3432.53	3.34078e-06	1.54035	1.32966e-10	2.90865	5.47615
MSTRG.20632	LOC100573877	uncharacterized LOC100573877	911.367	1099.2	813.099	1690.42	1821.53	2044.63	9.35959e-06	1.54301	3.72521e-10	2.91401	5.02874
MSTRG.9434	LOC115033053	#N/A	3238.93	3335.13	2700.28	5888.02	6152.31	6256.51	2.55412e-13	1.54561	1.01657e-17	2.91928	12.5928
MSTRG.10463	LOC100168612	uncharacterized LOC100168612	793.943	939.331	969.205	1746.31	1828.81	1790.04	1.29452e-06	1.55187	5.15233e-11	2.93196	5.88789
MSTRG.15308	LOC100164690	neuronal calcium sensor 2-like	795.056	859.321	580.59	1264.73	1451.65	1712.33	0.00487871	1.56058	1.94177e-07	2.94973	2.3117
MSTRG.1090	#N/A	#N/A	546.054	592.412	509.26	1021.56	984.89	1282.3	0.00111611	1.56927	4.44223e-08	2.96755	2.95229
MSTRG.10347	LOC100161607	uncharacterized LOC100161607	849.597	842.04	625.293	1411.87	1607.63	1613.03	5.03997e-05	1.57692	2.00596e-09	2.98333	4.29757
MSTRG.23660	#N/A	#N/A	332.476	311.489	322.3	636.469	651.334	706.076	0.00325811	1.63393	1.29676e-07	3.10357	2.48703
MSTRG.2450	LOC100569279	uncharacterized LOC100569279	613.309	634.586	624.721	1262.55	1328.25	1286.73	4.99944e-07	1.64148	1.98983e-11	3.11986	6.30108
MSTRG.19467	LOC107883940	#N/A	408.012	528.639	457.882	801.935	1071.71	1059.9	0.00333077	1.67731	1.32568e-07	3.1983	2.47746
MSTRG.7851	LOC100167258	zinc finger HIT domain-containing protein 2-like	714.974	862.54	608.099	1451.15	1563.58	1579.66	2.24885e-06	1.68151	8.95066e-11	3.20764	5.64804
MSTRG.16672	LOC100169340	uncharacterized LOC100169340	325.981	374.167	365.729	767.072	730.888	775.869	0.000305998	1.70376	1.2179e-08	3.25748	3.51428
MSTRG.17270	LOC100166984	protein phosphatases pp1 regulatory subunit-like	1583.72	1730.34	1146.36	3284.72	3135.32	3090.12	1.27657e-08	1.71171	5.08086e-13	3.27549	7.89396
MSTRG.9032	LOC100159129	uncharacterized LOC100159129	3528.93	3868.93	1911.51	6283.23	6617.18	6942.1	0.00275907	1.71778	1.09814e-07	3.2893	2.55924
MSTRG.21064	LOC100165853	protein phosphatase PHLPP-like protein-like	1321.98	986.931	839.879	2143.94	2447.93	2203.57	6.63921e-06	1.73296	2.64247e-10	3.32408	5.17788
MSTRG.5716	LOC100570620	uncharacterized LOC100570620	452.307	497.324	444.105	904.293	1075.78	1052.37	1.06864e-05	1.74895	4.25328e-10	3.36114	4.97117
MSTRG.10070	Rtv	retroactive	556.412	461.765	522.895	1062.1	1243.04	1093.74	1.21905e-05	1.77038	4.85195e-10	3.41144	4.91398
MSTRG.16429	LOC100164889	FERM domain-containing protein 3-like	945.644	1033.35	855.821	2062.23	2132.54	2040.94	9.61173e-13	1.77177	3.82557e-17	3.41473	12.0172
MSTRG.10	COX1	cytochrome c oxidase subunit I	97361.3	121803	72865.5	188132	230281	225203	7.2271e-08	1.7836	2.87646e-12	3.44285	7.14104
MSTRG.10513	LOC100167003	uncharacterized LOC100167003	290.386	331.964	225.299	617.823	582.558	676.752	0.00537762	1.79018	2.14034e-07	3.45858	2.26941
MSTRG.19140	LOC100165876	mitogen-activated protein kinase kinase kinase 15-like	261.827	261.788	250.622	572.529	593.11	581.399	0.000290485	1.82416	1.15616e-08	3.541	3.53688
MSTRG.2094	LOC100169080	uncharacterized LOC100169080	338.488	395.831	536.895	1023.14	893.424	1005.08	0.00453071	1.85036	1.80327e-07	3.60589	2.34383
MSTRG.20470	LOC100160479	uncharacterized LOC100160479	675.45	1044.15	871.101	1797.23	2037.19	2110.77	7.82168e-07	1.85924	3.1131e-11	3.62816	6.1067
MSTRG.21110	#N/A	#N/A	428.825	712.384	654.77	1227.13	1393.89	1520.04	0.000847847	1.86699	3.37451e-08	3.6477	3.07168
MSTRG.10254	#N/A	#N/A	575.659	687.478	396.002	1142.29	1258.56	1465.44	0.000407892	1.901	1.62345e-08	3.73472	3.38945
MSTRG.19390	#N/A	#N/A	290.29	295.266	227.543	655.958	615.463	638.069	0.000122785	1.91117	4.88697e-09	3.76115	3.91085
MSTRG.10983	#N/A	#N/A	378.355	557.803	409.138	921.954	1184.24	1067.09	8.75133e-05	1.92267	3.48311e-09	3.79123	4.05793
MSTRG.25465	#N/A	#N/A	397.58	445.446	305.595	841.871	927.528	940.134	1.86064e-05	1.92331	7.40554e-10	3.79293	4.73034
MSTRG.24624	#N/A	#N/A	306.429	391.436	345.646	736.603	793.788	952.625	6.39428e-05	1.93255	2.54499e-09	3.81729	4.19421
MSTRG.24203	LOC100569296	possible pseudogene or miscRNA, No KEGG entry	577.908	754.443	389.851	1269.9	1441.66	1363.86	0.000620867	1.93598	2.47111e-08	3.82638	3.207
MSTRG.2698	#N/A	#N/A	357.673	368.73	220.533	678.488	755.277	811.022	0.00402739	1.93744	1.60294e-07	3.83026	2.39498
MSTRG.25372	#N/A	#N/A	262.851	218.598	216.439	524.195	522.778	618.922	0.000798968	1.93958	3.17997e-08	3.83595	3.09747
MSTRG.17250	LOC100166284	calcium and integrin-binding protein 1-like	370.386	484.358	369.09	1042.33	1028.8	878.654	2.26692e-06	1.9639	9.02258e-11	3.90116	5.64456
MSTRG.8788	#N/A	#N/A	187.685	260.629	184.764	466.488	475.425	582.88	0.00667388	1.96802	2.65627e-07	3.91231	2.17562
MSTRG.19576	LOC100161512	glycosyltransferase-like protein LARGE1-like	550.83	562.259	590.069	1613.44	1244.68	1289.62	1.81076e-08	1.97735	7.20702e-13	3.9377	7.74214
MSTRG.21111	#N/A	#N/A	568.06	764.298	697.562	1445.79	1642.54	1861.62	3.92465e-08	1.98283	1.56205e-12	3.95268	7.4062
MSTRG.11331	LOC100168451	uncharacterized LOC100168451	266.561	251.028	251.044	635.42	607.35	639.28	1.04615e-05	1.98917	4.16376e-10	3.97009	4.98041
MSTRG.8501	#N/A	#N/A	478.708	563.247	384.956	1028.31	1186.79	1288.84	1.15666e-06	2.00712	4.60361e-11	4.01979	5.9368
MSTRG.7603	#N/A	#N/A	143.041	148.293	104.401	318.522	348.856	330.972	0.00349652	2.0625	1.39165e-07	4.17709	2.45636
MSTRG.19938	LOC100165710	uncharacterized LOC100165710	410.423	432.596	512.992	1205.78	1206.64	1054.14	5.02071e-08	2.07552	1.99829e-12	4.21495	7.29923
MSTRG.9027	#N/A	#N/A	373.691	329.904	258.302	839.218	877.216	757.751	3.22677e-06	2.10163	1.28429e-10	4.29194	5.49123
MSTRG.20844	LOC100167229	uncharacterized LOC100167229	266.791	364.517	451.466	960.521	964.353	880.442	0.000253321	2.10277	1.00824e-08	4.29532	3.59633
MSTRG.5119	LOC100165456	RNA-binding protein 38-like	3633.01	4013.88	3511.75	8739.76	9988.93	10366.3	7.97358e-27	2.12434	3.17356e-31	4.36004	26.0983
MSTRG.20102	LOC100162394	macrophage migration inhibitory factor-like	570.282	582.771	401.378	1203.34	1600.71	1250.52	4.19546e-07	2.13148	1.66983e-11	4.38168	6.37722
MSTRG.22719	#N/A	#N/A	245.884	323.332	206.859	676.824	674.988	690.396	1.91465e-05	2.15266	7.62048e-10	4.44648	4.71791
MSTRG.20115	LOC100144890	macrophage migration inhibitory factor-like protein	1452.72	1097.24	1021.16	2840.79	3734.98	2935.89	5.65763e-11	2.16894	2.25179e-15	4.49692	10.2474
MSTRG.29	#N/A	#N/A	526070	592174	380991	978017	1.40111e+06	1.62006e+06	3.13948e-08	2.17993	1.24955e-12	4.53132	7.50314
MSTRG.21798	LOC100568740	uncharacterized LOC100568740	155.651	180.701	110.586	368.684	374.554	455.856	0.0029883	2.19499	1.18937e-07	4.57886	2.52458
MSTRG.8791	#N/A	#N/A	652.315	761.052	542.437	1718.94	1601.66	1974.54	3.40353e-12	2.20741	1.35464e-16	4.61845	11.4681
MSTRG.3574	#N/A	#N/A	96.5078	139.661	121.455	314.259	329.863	327.261	0.000947089	2.21552	3.76951e-08	4.6445	3.02361
MSTRG.15776	LOC100165334	uncharacterized LOC100165334	219.584	249.897	190.873	569.755	554.714	682.893	4.52005e-06	2.23144	1.79903e-10	4.69603	5.34486
MSTRG.4249	#N/A	#N/A	460.463	576.205	279.109	1070.35	1209.94	1369.37	0.000142578	2.2682	5.67473e-09	4.81721	3.84595
MSTRG.18571	LOC100165116	uncharacterized LOC100165116	126.177	82.516	114.531	324.59	299.47	286.911	0.00335667	2.28066	1.33599e-07	4.85901	2.47409
MSTRG.23906	#N/A	#N/A	219.465	149.496	162.864	444.578	515.962	541.392	0.000229307	2.28865	9.12666e-09	4.88599	3.63958
MSTRG.20633	LOC100164012	uncharacterized LOC100164012	214.035	167.877	204.608	683.069	560.5	427.256	0.000597197	2.3003	2.3769e-08	4.92562	3.22388
MSTRG.23623	#N/A	#N/A	325.899	395.769	203.63	892.215	995.222	737.253	0.000231022	2.31272	9.19489e-09	4.96819	3.63635
MSTRG.13010	LOC100160462	uncharacterized LOC100160462	201.664	239.179	286.515	715.606	717.438	663.771	1.62799e-06	2.32654	6.47954e-11	5.01602	5.78835
MSTRG.9741	LOC100160768	ras-related protein Rab-8B-like	162.807	257.483	241.061	757.862	506.454	643.188	0.000625437	2.32846	2.4893e-08	5.02269	3.20382
MSTRG.7101	LOC100162014	multiple inositol polyphosphate phosphatase 1-like	265.566	255.421	352.353	949.112	914.346	672.413	1.764e-05	2.33452	7.02089e-10	5.04382	4.7535
MSTRG.20467	LOC100164594	uncharacterized LOC100164594	90.6965	74.8879	63.2331	261.897	195.649	205.946	0.00442144	2.35324	1.75978e-07	5.10971	2.35444
MSTRG.3429	#N/A	#N/A	164.937	256.336	155.67	579.242	565.806	548.289	3.93436e-05	2.37855	1.56592e-09	5.20013	4.40513
MSTRG.23198	#N/A	#N/A	86.199	128.859	109.094	353.037	271.698	332.115	0.000562182	2.38473	2.23754e-08	5.22247	3.25012
MSTRG.3394	#N/A	#N/A	127.167	191.471	99.542	411.804	345.713	474.884	0.00458125	2.39348	1.82338e-07	5.25424	2.33902
MSTRG.16208	LOC100160396	fatty acyl-CoA reductase 1-like	56.5544	69.4678	76.3352	180.091	239.998	177.79	0.00658026	2.39725	2.61901e-07	5.26798	2.18176
MSTRG.16525	#N/A	#N/A	495.962	534.149	357.211	1364.16	1356.2	1428.86	1.91279e-12	2.41621	7.61308e-17	5.33767	11.7183
MSTRG.20865	LOC100165337	G-protein coupled receptor moody-like	71.406	98.6354	97.0258	222.707	338.727	245.063	0.00458092	2.44128	1.82325e-07	5.43122	2.33905
MSTRG.5268	LOC107885087	#N/A	71.3014	85.6225	49.7637	187.1	236.138	197.389	0.00450771	2.44855	1.79411e-07	5.45868	2.34604
MSTRG.7161	LOC100161432	voltage-dependent calcium channel subunit alpha-2/delta-3-like	302.149	319.193	464.655	1109.51	1158.12	1076.76	8.06129e-08	2.45715	3.20847e-12	5.49131	7.0936
MSTRG.15794	LOC100161693	retinol dehydrogenase 12-like	369.45	367.81	452.418	1366.2	1188.12	1098.87	2.3128e-11	2.45738	9.20516e-16	5.4922	10.6359
MSTRG.16718	LOC100165810	transmembrane protein 181-like	143.393	158.151	223.94	571.039	516.9	530.985	5.18971e-05	2.46179	2.06556e-09	5.50901	4.28486
MSTRG.20821	#N/A	#N/A	91.7087	71.6609	69.0306	183.333	270.552	258.865	0.00280605	2.46863	1.11684e-07	5.53518	2.5519
MSTRG.18356	Cpx	complexin	96.6903	151.613	144.071	427.462	378.84	405.711	7.66155e-05	2.47404	3.04937e-09	5.55598	4.11568
MSTRG.16563	LOC100161639	calcium/calmodulin-dependent protein kinase type II alpha chain	124.054	157.043	171.945	470.076	495.431	435.107	5.28627e-06	2.47486	2.10399e-10	5.55914	5.27685
MSTRG.17275	LOC100160187	uncharacterized protein ZK1073.1-like	184.617	295.376	350.239	927.957	865.644	785.131	5.73611e-05	2.47975	2.28303e-09	5.57802	4.24138
MSTRG.14119	LOC100161727	serine/threonine-protein phosphatase 2A 65 kDa regulatory subunit A alpha isoform-like	180.801	194.808	126.495	483.044	580.245	483.778	6.83241e-06	2.48294	2.71937e-10	5.59035	5.16543
MSTRG.15733	LOC100164166	uncharacterized LOC100164166	2618.32	3704.87	4807.9	12129	11361	11280.9	6.91475e-11	2.48744	2.75214e-15	5.60784	10.1602
MSTRG.6818	#N/A	#N/A	284.756	383.861	159.68	853.749	844.836	865.129	0.000459636	2.49916	1.8294e-08	5.65357	3.33759
MSTRG.23174	LOC103311780	#N/A	114.675	165.581	100.776	380.869	455.089	347.794	0.000147393	2.50111	5.8664e-09	5.66123	3.83152
MSTRG.17121	#N/A	#N/A	114.537	107.282	66.7807	309.315	308.502	281.555	0.000304575	2.51705	1.21224e-08	5.72412	3.51631
MSTRG.23622	#N/A	#N/A	193.372	179.707	114.464	425.006	540.252	564.24	8.71919e-05	2.52051	3.47032e-09	5.73785	4.05952
MSTRG.1188	#N/A	#N/A	84.1327	152.662	112.353	363.504	366.591	388.941	0.00013157	2.55652	5.23661e-09	5.88285	3.88084
MSTRG.16925	#N/A	#N/A	146.467	127.848	100.76	374.006	401.593	424.233	2.09244e-06	2.55755	8.32812e-11	5.88707	5.67935
MSTRG.24925	LOC100569563	protein PTCD3 homolog, mitochondrial-like	196.829	240.16	107.2	583.46	651.196	496.741	0.0011722	2.55927	4.66547e-08	5.89409	2.931
MSTRG.1604	#N/A	#N/A	41.4643	39.1772	28.7521	112.756	122.297	114.721	0.00220956	2.5658	8.79427e-08	5.92085	2.65569
MSTRG.18678	#N/A	#N/A	223.177	363.333	197.228	811.803	810.954	909.786	1.15211e-06	2.58658	4.58553e-11	6.00673	5.9385
MSTRG.19112	LOC100574493	uncharacterized LOC100574493	183.404	291.035	310.619	877.26	908.646	780.715	6.79691e-07	2.59102	2.70524e-11	6.02524	6.16769
MSTRG.8351	LOC100166569	neurexin-4-like	79.4773	136.443	105.823	355.353	359.674	334.188	4.71076e-05	2.59817	1.87493e-09	6.0552	4.32691
MSTRG.2695	LOC100574186	uncharacterized LOC100574186	706.152	1056.08	600.049	2396.61	2538.45	2849.86	1.99286e-13	2.62392	7.93177e-18	6.16423	12.7005
MSTRG.16867	LOC100163089	diacylglycerol kinase theta-like	572.743	623.961	940.555	2754.2	2209.61	2251.18	1.28375e-10	2.64691	5.10945e-15	6.26323	9.89152
MSTRG.14751	LOC100574390	uncharacterized LOC100574390	556.708	459.688	471.021	1391.76	1591.9	2005.11	6.00486e-14	2.64757	2.38999e-18	6.26611	13.2215
MSTRG.23624	#N/A	#N/A	207.299	282.335	146.359	665.41	715.999	734.038	1.21018e-06	2.64857	4.81663e-11	6.27045	5.91715
MSTRG.18376	LOC100167247	ras-related protein Rab-3-like	108.137	202.457	273.276	724.217	662.505	589.359	0.00779515	2.65964	3.10255e-07	6.31876	2.10818
MSTRG.20873	#N/A	#N/A	70.3573	141.852	125.08	330.37	408.839	399.136	0.00115345	2.66567	4.59085e-08	6.34523	2.938
MSTRG.22718	#N/A	#N/A	132.931	142.965	102.123	409.387	373.729	489.566	8.2695e-07	2.66856	3.29134e-11	6.35794	6.08252
MSTRG.20182	#N/A	#N/A	153.579	211.005	108.424	531.315	494.458	594.256	8.7912e-06	2.70861	3.49899e-10	6.5369	5.05595
MSTRG.18231	#N/A	#N/A	36.9988	40.2638	30.0219	121.858	119.588	126.241	0.000201713	2.71433	8.02837e-09	6.56289	3.69527
MSTRG.13500	#N/A	#N/A	160.279	191.564	105.805	475.114	521.973	587.823	2.63761e-06	2.73241	1.0498e-10	6.64563	5.57879
MSTRG.20084	LOC100159519	uncharacterized LOC100159519	251.908	286.752	275.684	1032.57	945.509	872.94	6.50517e-15	2.73476	2.58912e-19	6.65649	14.1867
MSTRG.627	LOC100574244	uncharacterized LOC100574244	55.5953	105.162	109.907	378.273	290.837	275.895	0.00271997	2.74021	1.08258e-07	6.68169	2.56544
MSTRG.21533	LOC100161839	potassium voltage-gated channel protein eag-like	57.8084	38.2228	67.1413	195.311	198.625	182.496	0.000723296	2.75625	2.87879e-08	6.75639	3.14068
MSTRG.1086	LOC100162264	RUN domain-containing protein 1-like	142.28	172.195	183.953	579.842	608.256	575.987	6.67941e-10	2.75664	2.65847e-14	6.75818	9.17526
MSTRG.10501	LOC100575917	short neuropeptide F-like	37.2691	41.4168	52.4736	148.213	151.142	164.085	0.000157209	2.75735	6.25706e-09	6.76152	3.80352
MSTRG.13	COX2	cytochrome c oxidase subunit II	3662.86	5400.37	2820.48	10207.5	15308.5	16475.1	5.04678e-10	2.77044	2.00867e-14	6.82316	9.29699
MSTRG.2920	#N/A	#N/A	937.951	1216.1	996.509	4196.64	3518.03	3496.15	9.87707e-30	2.77235	3.93117e-34	6.83222	29.0054
MSTRG.16415	LOC100160618	protein msta, isoform A-like	104.49	100.843	68.2216	269.359	440.3	264.124	0.000523697	2.79032	2.08437e-08	6.91785	3.28092
MSTRG.20692	LOC100570406	5-azacytidine-induced protein 1-like	35.9759	28.4389	33.8991	99.6726	135.051	117.727	0.000899733	2.79326	3.58103e-08	6.93194	3.04589
MSTRG.9452	LOC100167995	uncharacterized LOC100167995	1997.43	2521.59	2929.07	12106.4	7283.8	7790.4	1.45394e-12	2.81383	5.78682e-17	7.03151	11.8375
MSTRG.17198	LOC100572122	uncharacterized LOC100572122	44.0912	59.7665	58.3842	201.879	174.826	208.711	1.57076e-05	2.81517	6.25177e-10	7.03804	4.80389
MSTRG.9720	LOC100158826	uncharacterized LOC100158826	307.914	503.956	492.88	1712.5	1841.65	1199.12	6.47389e-09	2.81587	2.57667e-13	7.04143	8.18883
MSTRG.6226	#N/A	#N/A	59.9021	91.0123	39.9791	184.641	236.862	260.989	0.00467715	2.818	1.86155e-07	7.05184	2.33002
MSTRG.12714	LOC100571263	uncharacterized LOC100571263	596.681	344.108	551.571	1413.41	2060.1	1988.05	1.33811e-08	2.81981	5.32579e-13	7.06068	7.87351
MSTRG.24101	#N/A	#N/A	30.3361	34.868	23.0994	103.094	107.981	105.062	0.000399675	2.82137	1.59074e-08	7.06834	3.39829
MSTRG.12531	LOC100572677	vesicular glutamate transporter 1-like	40.5539	32.8026	63.9276	167.33	181.95	156.015	0.00508133	2.82526	2.02242e-07	7.08743	2.29402
MSTRG.1190	#N/A	#N/A	60.9909	75.9127	35.1071	224.68	184.754	216.561	0.00083401	2.84618	3.31944e-08	7.19093	3.07883
MSTRG.2443	LOC100161602	uncharacterized LOC100161602	584.072	449.995	623.289	2350.6	2021.61	1823.45	1.60035e-17	2.86331	6.36956e-22	7.27683	16.7958
MSTRG.6021	LOC100161457	cmp-n-acetylneuraminic acid synthase-like	148.063	256.486	288.797	918.983	710.066	964.633	2.90759e-06	2.86781	1.15725e-10	7.29956	5.53647
MSTRG.12675	LOC100570783	uncharacterized LOC100570783	50.99	58.716	61.0876	169.589	199.568	268.966	8.19277e-05	2.87873	3.2608e-09	7.35503	4.08657
MSTRG.11110	LOC115033841	#N/A	83.869	97.5578	49.8219	236.117	345.352	273.656	0.000227609	2.88252	9.05906e-09	7.37437	3.64281
MSTRG.25424	#N/A	#N/A	39.2782	32.7719	45.5296	131.277	159.118	152.203	7.28758e-05	2.88779	2.90053e-09	7.40138	4.13742
MSTRG.10775	#N/A	#N/A	208.191	127.942	166.606	418.857	694.664	791.138	8.80761e-05	2.89852	3.50552e-09	7.4566	4.05514
MSTRG.2931	#N/A	#N/A	123.873	139.77	140.881	356.152	513.653	668.725	6.64914e-06	2.90905	2.64642e-10	7.51126	5.17723
MSTRG.17022	LOC103310392	#N/A	60.0069	108.33	60.6645	211.604	388.556	268.419	0.00280872	2.92797	1.1179e-07	7.6104	2.55149
MSTRG.7397	#N/A	#N/A	358.009	522.297	366.951	1562.99	1643.28	1601.18	1.10739e-19	2.94301	4.40752e-24	7.69013	18.9557
MSTRG.22418	#N/A	#N/A	49.5102	47.8426	21.6956	123.636	160.826	173.415	0.00738603	2.95414	2.93971e-07	7.74967	2.13159
MSTRG.8344	LOC100575247	uncharacterized LOC100575247	81.5282	107.243	36.4216	298.04	244.743	318.525	0.00757061	2.95456	3.01318e-07	7.75195	2.12087
MSTRG.22482	#N/A	#N/A	24.5568	40.2775	38.319	107.905	130.868	164.935	0.00146165	2.968	5.8175e-08	7.82451	2.83516
MSTRG.25371	#N/A	#N/A	87.3947	92.19	49.9683	298.07	326.024	263.37	8.48944e-06	2.96953	3.37888e-10	7.83284	5.07112
MSTRG.12570	LOC100573718	uncharacterized LOC100573718	48.7257	70.6152	85.3589	274.933	272.633	254.218	7.0126e-06	2.97225	2.79108e-10	7.84762	5.15412
MSTRG.23975	#N/A	#N/A	40.4698	55.3727	25.3058	136.199	138.763	193.139	0.00308437	2.98272	1.22761e-07	7.90474	2.51083
MSTRG.8590	#N/A	#N/A	66.9215	73.8502	69.4268	295.639	305.02	221.633	2.05798e-07	2.98372	8.19096e-12	7.91022	6.68656
MSTRG.22563	#N/A	#N/A	203.809	197.077	208.169	706.973	732.364	964.728	7.41849e-13	2.98728	2.95263e-17	7.92978	12.1297
MSTRG.1496	LOC100166506	uncharacterized LOC100166506	277.091	441.315	553.673	1726.19	1766.43	1589.76	2.61022e-10	3.00197	1.03889e-14	8.01091	9.58332
MSTRG.2474	LOC100573870	dihydroxyacetone phosphate acyltransferase-like	56.4841	84.5631	42.3494	221.437	227.703	275.39	3.19165e-05	3.01658	1.27031e-09	8.09246	4.49598
MSTRG.1717	#N/A	#N/A	135.362	225.064	108.39	659.582	601.937	612.923	2.45004e-07	3.03578	9.75141e-12	8.20092	6.61083
MSTRG.6228	LOC100569605	elongation of very long chain fatty acids protein 4-like	31.5324	54.3632	54.5576	184.253	207.593	174.372	4.68353e-05	3.04982	1.86409e-09	8.2811	4.32943
MSTRG.14748	LOC100574209	uncharacterized LOC100574209	320.426	171.209	309.999	859.305	1132.07	1288.45	3.83707e-07	3.0504	1.52719e-11	8.28443	6.416
MSTRG.3818	#N/A	#N/A	418.452	576.313	274.406	1431.17	1840.62	1852.21	9.8088e-11	3.05133	3.904e-15	8.28978	10.0084
MSTRG.20501	#N/A	#N/A	34.7312	35.9982	40.6662	148.989	154.722	148.766	8.98804e-07	3.06595	3.57733e-11	8.37418	6.04634
MSTRG.224	#N/A	#N/A	27.8565	38.0739	17.8551	92.1077	114.287	133.977	0.00218524	3.07679	8.69748e-08	8.43734	2.6605
MSTRG.4840	LOC100159863	protein Wnt-5a-like	145.729	272.657	200.953	860.302	853.722	840.54	1.30879e-10	3.0859	5.2091e-15	8.49078	9.88313
MSTRG.8591	#N/A	#N/A	66.85	68.4484	60.7623	280.645	305.378	221.986	3.69173e-08	3.09312	1.46935e-12	8.53338	7.43277
MSTRG.16976	LOC100166952	solute carrier family 35 member F4-like	38.4763	97.6244	112.189	354.012	373.915	309.792	0.00649093	3.1042	2.58346e-07	8.5992	2.18769
MSTRG.1048	#N/A	#N/A	233.684	444.53	464.332	1454.78	1640.98	1706.38	3.92612e-10	3.11512	1.56264e-14	8.66454	9.40604
MSTRG.15218	LOC103310843	#N/A	94.3876	127.871	79.3572	261.193	604.426	391.014	0.000590984	3.11706	2.35217e-08	8.67617	3.22842
MSTRG.17613	#N/A	#N/A	124.951	145.143	79.044	429.792	479.458	563.445	4.32455e-08	3.13958	1.72121e-12	8.81266	7.36406
MSTRG.18204	LOC100163213	protein unc-79 homolog	168.547	158.198	181.647	812.827	685.259	688.043	2.04299e-15	3.16301	8.13132e-20	8.95696	14.6897
MSTRG.23434	#N/A	#N/A	55.3813	61.9525	54.4636	187.638	232.806	316.229	2.00851e-06	3.17441	7.99405e-11	9.028	5.69713
MSTRG.1173	#N/A	#N/A	61.1341	95.3666	27.9748	242.503	280.196	261.324	0.00594308	3.1784	2.36541e-07	9.05304	2.22599
MSTRG.24597	#N/A	#N/A	119.421	189.457	132.66	599.004	628.985	669.668	9.30879e-12	3.17892	3.70499e-16	9.0563	11.0311
MSTRG.10279	LOC100167646	uncharacterized LOC100167646	25.8695	39.2564	42.734	149.706	192.126	123.258	0.000148412	3.1819	5.90694e-09	9.07503	3.82853
MSTRG.2425	#N/A	#N/A	20.9365	17.5827	15.2664	63.7287	90.0235	73.2456	0.00129333	3.18569	5.14758e-08	9.09889	2.88829
MSTRG.22877	#N/A	#N/A	17.635	26.1752	11.8096	63.9236	88.4555	84.6984	0.00816963	3.19157	3.25159e-07	9.13604	2.0878
MSTRG.728	#N/A	#N/A	22.1468	24.0731	21.3141	86.3652	126.337	75.6843	0.000890509	3.19613	3.54431e-08	9.16495	3.05036
MSTRG.14752	LOC100574487	uncharacterized LOC100574487	188.035	164.707	241.666	683.26	674.176	1269.44	1.37228e-06	3.21379	5.46181e-11	9.27786	5.86256
MSTRG.6331	LOC100570619	uncharacterized LOC100570619	255.409	309.526	593.896	2175.87	1854.57	1153.35	7.35357e-05	3.22535	2.92679e-09	9.35246	4.1335
MSTRG.9697	LOC100163518	uncharacterized LOC100163518	34.9879	28.495	49.9945	178.341	166.011	161.49	7.72812e-06	3.24214	3.07587e-10	9.46199	5.11193
MSTRG.20336	#N/A	#N/A	167.31	193.791	86.6006	598.771	669.676	718.809	6.68045e-08	3.25039	2.65888e-12	9.51621	7.17519
MSTRG.8932	#N/A	#N/A	40.5132	52.1707	24.1516	140.507	211.624	162.474	0.000189739	3.25434	7.55178e-09	9.54231	3.72184
MSTRG.3292	#N/A	#N/A	67.8689	61.9641	46.0426	169.7	249.875	366.097	0.000165942	3.27229	6.60465e-09	9.66181	3.78004
MSTRG.8770	#N/A	#N/A	61.247	136.468	77.8491	260.471	459.343	521.755	0.000856837	3.27754	3.4103e-08	9.697	3.0671
MSTRG.10854	#N/A	#N/A	63.2824	50.0847	38.7528	117.223	259.765	310.191	0.00980157	3.28334	3.90112e-07	9.73606	2.0087
MSTRG.2608	#N/A	#N/A	361.313	418.565	161.033	1095.56	1516.67	1626.75	7.3726e-07	3.28441	2.93437e-11	9.74329	6.13238
MSTRG.3062	#N/A	#N/A	25.6159	24.0959	20.3022	130.685	103.698	80.7822	0.000101488	3.29032	4.03931e-09	9.78327	3.99359
MSTRG.1946	#N/A	#N/A	61.1395	54.4005	32.8699	280.779	253.457	139.385	0.000620254	3.29671	2.46867e-08	9.82674	3.20743
MSTRG.21374	LOC100571326	nose resistant to fluoxetine protein 6-like	52.1066	57.6488	46.3403	210.416	260.217	241.232	1.63377e-09	3.30183	6.50258e-14	9.86168	8.78681
MSTRG.21219	#N/A	#N/A	21.1114	49.9267	19.0684	118.915	131.634	153.659	0.00596714	3.31008	2.37498e-07	9.91818	2.22423
MSTRG.25594	#N/A	#N/A	28.9759	20.8603	15.4856	76.1721	97.4666	124.06	0.00131596	3.32564	5.23764e-08	10.0258	2.88076
MSTRG.8051	#N/A	#N/A	26.8551	51.0384	16.8228	131.842	154.944	147.636	0.00184141	3.342	7.32901e-08	10.1401	2.73485
MSTRG.21614	#N/A	#N/A	16.5607	32.7021	24.9982	85.8293	116.769	140.335	0.000792578	3.34849	3.15454e-08	10.1858	3.10096
MSTRG.21615	#N/A	#N/A	16.5402	32.6987	24.9187	86.121	117.122	140.522	0.000792578	3.34849	3.15454e-08	10.1858	3.10096
MSTRG.3365	LOC100574542	glutamate receptor delta-2 subunit-like	42.8648	69.453	27.8687	191.102	227.777	228.129	3.51584e-05	3.3525	1.39934e-09	10.2142	4.45397
MSTRG.16541	#N/A	#N/A	69.082	88.9565	53.3746	324.081	339.649	322.812	2.19209e-10	3.36032	8.72472e-15	10.2697	9.65914
MSTRG.20848	LOC100569114	uncharacterized LOC100569114	133.255	133.38	262.387	824.885	852.993	847.154	8.26659e-08	3.36625	3.29018e-12	10.312	7.08267
MSTRG.12668	#N/A	#N/A	98.9062	119.283	137.494	598.431	559.68	525.277	2.52254e-13	3.36676	1.00399e-17	10.3156	12.5982
MSTRG.19737	#N/A	#N/A	87.4541	131.119	90.0153	454.682	454.188	558.752	2.02448e-11	3.38426	8.05764e-16	10.4415	10.6937
MSTRG.3017	LOC100163467	toll-like receptor 3-like	157.146	100.963	193.813	674.615	738.378	758.855	1.41319e-09	3.38553	5.62463e-14	10.4507	8.8498
MSTRG.17146	#N/A	#N/A	52.0359	61.9856	67.8538	317.95	324.159	240.937	1.16232e-09	3.41957	4.62615e-14	10.7002	8.93467
MSTRG.1007	LOC100164836	pyridoxine/pyridoxamine 5'-phosphate oxidase-like	12.0775	11.111	13.3849	63.6486	58.9952	52.6132	0.00096294	3.4281	3.8326e-08	10.7637	3.0164
MSTRG.17548	#N/A	#N/A	30.4009	54.3349	23.1142	206.305	166.743	142.222	0.000100548	3.43144	4.0019e-09	10.7886	3.99763
MSTRG.2763	#N/A	#N/A	69.2505	169.976	92.4651	466.747	570.874	573.686	1.84005e-06	3.43747	7.3236e-11	10.8339	5.73517
MSTRG.16616	LOC103308569	#N/A	17.8646	40.3289	40.1676	133.522	211.766	129.725	0.00202772	3.44077	8.07054e-08	10.8586	2.69299
MSTRG.1033	#N/A	#N/A	13.978	8.9234	10.1619	46.7566	62.7168	52.2181	0.00845339	3.44587	3.36453e-07	10.8971	2.07297
MSTRG.9365	#N/A	#N/A	40.6488	96.4433	32.7752	289.728	252.748	280.322	0.000554008	3.45215	2.20501e-08	10.9446	3.25648
MSTRG.16384	LOC100158802	sodium channel protein para-like	24.7226	18.773	46.3831	139.832	189.945	119.751	0.00388045	3.4634	1.54446e-07	11.0303	2.41112
MSTRG.22012	#N/A	#N/A	49.6306	44.685	39.864	151.834	225.95	285.582	1.72015e-06	3.47363	6.84635e-11	11.1088	5.76443
MSTRG.22329	#N/A	#N/A	13.1589	31.5968	16.6737	89.6975	80.783	132.211	0.00460986	3.4755	1.83477e-07	11.1232	2.33631
MSTRG.8806	#N/A	#N/A	24.6111	17.6568	25.4068	69.5347	127.477	136.641	0.000972477	3.47819	3.87055e-08	11.1439	3.01212
MSTRG.422	LOC100574937	uncharacterized LOC100574937	9.7709	26.2411	26.3537	105.786	101.04	104.049	0.000810844	3.50104	3.22724e-08	11.3219	3.09106
MSTRG.21128	#N/A	#N/A	89.632	113.829	66.8115	248.041	493.908	605.937	5.13618e-05	3.50211	2.04425e-09	11.3303	4.28936
MSTRG.17686	#N/A	#N/A	33.8039	47.9086	38.8293	161.88	218.63	227.897	2.17374e-08	3.51279	8.65171e-13	11.4144	7.66279
MSTRG.16842	LOC100161200	uncharacterized LOC100161200	38.4701	39.3434	100.043	399.123	259.878	259.347	0.00546169	3.53082	2.17381e-07	11.558	2.26267
MSTRG.4845	#N/A	#N/A	28.9216	25.1708	11.7883	92.6007	116.458	125.245	0.000120445	3.53456	4.79384e-09	11.588	3.91921
MSTRG.18753	#N/A	#N/A	99.8923	120.308	51.111	380.312	527.549	473.165	1.55535e-07	3.5405	6.19044e-12	11.6358	6.80817
MSTRG.19232	LOC100575820	centrosomal protein of 290 kDa-like	30.4656	53.3789	105.751	303.463	346.939	337.058	0.0034087	3.55764	1.3567e-07	11.7749	2.46741
MSTRG.24516	#N/A	#N/A	110.176	94.4394	100.827	446.751	543.07	590.979	1.40749e-14	3.56183	5.60196e-19	11.8091	13.8516
MSTRG.12605	LOC100169533	protein SCAI-like	100.142	178.731	206.006	971.375	827.328	736.58	3.85361e-10	3.56589	1.53378e-14	11.8424	9.41413
MSTRG.580	#N/A	#N/A	58.9806	58.7959	110.63	410.843	436.459	374.164	7.88115e-08	3.6053	3.13678e-12	12.1704	7.10341
MSTRG.19734	#N/A	#N/A	42.7024	33.8536	15.6215	160.777	135.827	180.732	8.8697e-05	3.60812	3.53023e-09	12.1942	4.05209
MSTRG.17430	LOC100165649	uncharacterized LOC100165649	17.563	6.80608	12.9312	73.2038	59.2581	65.0851	0.00332287	3.60923	1.32254e-07	12.2036	2.47849
MSTRG.11941	LOC100159688	uncharacterized LOC100159688	37.3371	67.4361	120.826	427.372	441.72	342.28	0.000458067	3.61793	1.82315e-08	12.2774	3.33907
MSTRG.14261	LOC107882255	#N/A	24.4686	10.0841	17.9103	65.8317	88.6397	126.742	0.0075004	3.62707	2.98523e-07	12.3554	2.12492
MSTRG.7014	LOC100166690	Bardet-Biedl syndrome 4 protein homolog	14.2759	20.8261	13.0704	108.024	71.3178	75.528	0.000107483	3.6345	4.27792e-09	12.4192	3.96866
MSTRG.9962	LOC100167428	acetylcholine receptor subunit beta-like 1-like	46.4827	92.3056	184.164	583.488	615.105	568.566	0.00248266	3.64652	9.88123e-08	12.5231	2.60508
MSTRG.989	LOC100569451	uncharacterized LOC100569451	93.2514	89.0545	112.193	596.167	569.278	430.03	1.96392e-13	3.64721	7.81659e-18	12.5291	12.7069
MSTRG.2605	#N/A	#N/A	23.4027	34.8913	17.9388	147.689	127.987	133.639	2.00228e-07	3.64975	7.96927e-12	12.5512	6.69848
MSTRG.2970	#N/A	#N/A	9.73086	26.2307	22.5488	98.1044	91.5361	122.523	0.000299497	3.65271	1.19203e-08	12.577	3.52361
MSTRG.11068	LOC100168347	lachesin-like	20.0608	10.1038	31.4134	89.0841	106.383	136.721	0.00428626	3.66911	1.70597e-07	12.7207	2.36792
MSTRG.22450	#N/A	#N/A	37.0591	26.3093	20.4758	143.351	127.043	183.368	9.30419e-07	3.67338	3.70316e-11	12.7584	6.03132
MSTRG.2013	LOC100168237	proton-coupled amino acid transporter 4-like	82.9779	55.5578	75.7076	436.737	438.074	300.75	2.80844e-10	3.67482	1.11779e-14	12.7712	9.55153
MSTRG.20472	LOC100573440	possible pseudogene or miscRNA, No KEGG entry	177.761	144.191	205.015	980.709	1103.62	831.396	2.11108e-18	3.68204	8.40232e-23	12.8352	17.6755
MSTRG.19731	#N/A	#N/A	16.382	13.2606	8.03418	68.2378	66.2427	69.856	0.000112967	3.68762	4.49618e-09	12.885	3.94705
MSTRG.7394	LOC100575827	uncharacterized LOC100575827	21.2591	24.1371	23.1108	160.18	110.95	107.658	3.05956e-07	3.70456	1.21774e-11	13.0372	6.51434
MSTRG.19714	#N/A	#N/A	10.9267	12.231	21.7309	73.7072	100.441	76.9264	0.000442491	3.70472	1.76116e-08	13.0386	3.3541
MSTRG.22870	#N/A	#N/A	82.8491	123.539	41.4106	372.449	502.512	481.096	2.52361e-06	3.70534	1.00442e-10	13.0442	5.59798
MSTRG.13825	#N/A	#N/A	38.4013	37.1553	51.0619	199.772	262.859	247.023	3.81138e-10	3.73336	1.51697e-14	13.3001	9.41892
MSTRG.8678	#N/A	#N/A	25.678	34.8947	14.3466	130.873	115.9	167.704	1.20151e-05	3.73708	4.78213e-10	13.3344	4.92027
MSTRG.3464	LOC100165959	uncharacterized LOC100165959	12.1377	31.6483	17.0619	115.515	119.022	106.585	2.70553e-05	3.75471	1.07683e-09	13.4984	4.56775
MSTRG.1131	LOC100571031	uncharacterized LOC100571031	13.0985	8.94917	9.44449	58.2271	76.3832	41.4525	0.00540736	3.76216	2.15218e-07	13.5682	2.26701
MSTRG.6491	#N/A	#N/A	39.4967	67.3396	30.3347	269.051	267.095	234.096	2.64848e-08	3.76377	1.05412e-12	13.5834	7.577
MSTRG.17560	LOC100573715	uncharacterized LOC100573715	41.9094	56.651	151.072	568.918	422.303	455.835	0.00507405	3.76621	2.01952e-07	13.6064	2.29464
MSTRG.6821	LOC100159280	uncharacterized LOC100159280	99.0084	138.766	157.469	795.026	776.085	709.555	3.63486e-17	3.77005	1.44671e-21	13.6426	16.4395
MSTRG.19990	#N/A	#N/A	186.816	264.083	156.074	1029.7	1143.68	1329.46	2.32533e-20	3.79055	9.25504e-25	13.8379	19.6335
MSTRG.15358	LOC100166349	sialic acid synthase-like	42.9931	38.2557	69.3379	326.254	251.225	296.431	9.79245e-09	3.7918	3.89749e-13	13.8499	8.00911
MSTRG.2002	ACYPI26172	#N/A	44.1234	36.0794	43.8805	217.571	273.69	225.362	9.45708e-12	3.80339	3.76401e-16	13.9616	11.0242
MSTRG.20210	LOC100164409	CG2004-like	21.3099	32.8357	59.6055	225.693	239.998	213.105	1.30413e-05	3.84022	5.19055e-10	14.3226	4.88468
MSTRG.14718	LOC100575663	uncharacterized LOC100575663	28.1728	47.9477	47.642	124.707	263.37	343.314	0.000405833	3.84797	1.61525e-08	14.3997	3.39165
MSTRG.15424	LOC100160786	inhibitory POU protein-like	23.4607	29.5368	24.0678	136.472	177.013	141.324	8.56571e-10	3.84962	3.40924e-14	14.4162	9.06724
MSTRG.2267	LOC100169017	putative fatty acyl-CoA reductase CG5065-like	31.6141	30.7	84.1334	314.799	318.995	255.992	0.000292256	3.87358	1.16321e-08	14.6576	3.53424
MSTRG.23550	LOC107885293	#N/A	232.595	495.374	429.479	2563.33	2317.26	2116.59	5.37944e-18	3.87639	2.14107e-22	14.6862	17.2693
MSTRG.11426	LOC100574568	uncharacterized LOC100574568	12.079	14.4053	22.9339	122.909	107.426	67.0334	0.000234258	3.87694	9.32369e-09	14.6918	3.63031
MSTRG.10850	LOC100169341	alpha-catulin-like	41.8218	34.9906	34.1093	255.79	203.507	205.119	3.35507e-12	3.88622	1.33535e-16	14.7867	11.4743
MSTRG.19102	#N/A	#N/A	33.8437	44.7336	77.5064	271.379	331.082	352.229	1.60116e-07	3.89267	6.37278e-12	14.8529	6.79556
MSTRG.963	#N/A	#N/A	11.9722	21.9094	12.9459	85.7766	108.895	88.4238	1.8658e-06	3.90408	7.42607e-11	14.9708	5.72913
MSTRG.16624	#N/A	#N/A	25.7531	19.8353	22.9445	129.677	151.977	141.126	2.45294e-10	3.93425	9.76295e-15	15.2872	9.61031
MSTRG.18534	#N/A	#N/A	57.6997	91.1021	15.7595	309.85	368.286	325.7	0.00468638	3.94437	1.86523e-07	15.3947	2.32916
MSTRG.21717	#N/A	#N/A	25.7899	45.7515	33.7928	166.986	217.732	267.946	1.08828e-08	3.94806	4.33148e-13	15.4342	7.96326
MSTRG.24560	#N/A	#N/A	16.585	37.0431	16.6731	79.2996	157.978	194.195	0.00205046	3.94877	8.16104e-08	15.4418	2.68815
MSTRG.18481	LOC100574027	uncharacterized LOC100574027	23.5268	24.1824	43.4953	243.072	177.275	159.596	4.9165e-07	3.97139	1.95682e-11	15.6859	6.30834
MSTRG.12789	#N/A	#N/A	70.3226	110.597	41.3903	304.134	507.568	595.967	1.80833e-06	4.00987	7.19734e-11	16.1098	5.74272
MSTRG.1259	#N/A	#N/A	16.5339	19.7718	10.6223	99.5265	110.65	82.7805	4.08662e-07	4.02029	1.62652e-11	16.2267	6.38864
MSTRG.10022	LOC115033815	#N/A	23.4438	9.01065	13.2528	112.582	75.8318	106.369	6.4429e-05	4.03058	2.56434e-09	16.3428	4.19092
MSTRG.12722	#N/A	#N/A	75.9389	59.8598	42.5402	325.061	378.024	450.732	1.05678e-12	4.03384	4.20608e-17	16.3797	11.976
MSTRG.2677	LOC100163553	two pore potassium channel protein sup-9-like	14.4352	25.2444	32.882	171.298	168.944	135.959	1.35541e-07	4.06251	5.39466e-12	16.7085	6.86793
MSTRG.3042	#N/A	#N/A	13.2436	26.3031	26.5454	125.875	142.616	174.296	9.41726e-08	4.10104	3.74816e-12	17.1607	7.02608
MSTRG.12829	LOC100166866	glutamate-gated chloride channel-like	57.897	83.652	90.3154	522.384	522.736	520.237	8.08363e-18	4.11038	3.21736e-22	17.2722	17.0924
MSTRG.15344	LOC100161526	vesicular inhibitory amino acid transporter-like	32.703	32.814	20.7075	190.241	210.547	171.373	4.26077e-12	4.11046	1.69583e-16	17.2732	11.3705
MSTRG.19661	#N/A	#N/A	54.3887	52.2885	32.9158	317.573	278.207	335.432	3.71545e-14	4.11207	1.47879e-18	17.2924	13.43
MSTRG.17537	LOC100166601	uncharacterized LOC100166601	214.307	146.366	206.282	639.073	2050.48	1184.4	3.81651e-07	4.12549	1.51901e-11	17.454	6.41833
MSTRG.7689	LOC100169250	acetylcholinesterase-like	22.4752	35.0256	83.0012	377.61	279.076	328.404	0.00022607	4.16288	8.9978e-09	17.9124	3.64576
MSTRG.25355	#N/A	#N/A	12.0114	19.7674	10.6434	84.268	96.0917	106.165	1.42537e-07	4.18195	5.67312e-12	18.1507	6.84607
MSTRG.9453	#N/A	#N/A	283.968	442.461	528.332	2898.1	2720.66	3217.22	8.33507e-28	4.18386	3.31744e-32	18.1747	27.0791
MSTRG.17113	#N/A	#N/A	5.03631	5.65275	6.81281	42.7261	37.4278	32.863	0.00587534	4.18476	2.33844e-07	18.186	2.23097
MSTRG.9235	LOC100165318	uncharacterized LOC100165318	72.7524	107.454	199.938	955.971	933.377	813.506	2.67433e-09	4.194	1.06441e-13	18.3029	8.57278
MSTRG.23551	#N/A	#N/A	266.821	266.305	192.863	1614.05	1723.26	1769.89	1.98364e-42	4.19652	7.89508e-47	18.3349	41.7025
MSTRG.13150	LOC100169176	synaptogyrin-2-like	80.7275	75.0258	103.732	676.36	606.298	551.039	1.21701e-19	4.20194	4.84382e-24	18.4039	18.9147
MSTRG.833	LOC100159669	protein unc-80 homolog	12.1454	18.7708	35.3111	155.907	137.865	173.365	3.22316e-06	4.21597	1.28285e-10	18.5838	5.49172
MSTRG.8147	LOC100162583	gamma-aminobutyric acid type B receptor subunit 1-like	23.6174	29.6226	78.01	386.383	334.645	248.066	0.000156492	4.26862	6.22853e-09	19.2744	3.80551
MSTRG.12672	#N/A	#N/A	70.4305	62.0433	52.5051	421.256	544.209	378.808	2.21868e-17	4.28096	8.83058e-22	19.44	16.6539
MSTRG.17287	#N/A	#N/A	9.80643	18.6915	8.39587	60.1299	94.4228	113.393	5.81651e-05	4.31769	2.31503e-09	19.9413	4.23534
MSTRG.20509	#N/A	#N/A	6.36747	31.7051	32.4119	168.993	158.233	196.125	0.00240672	4.32177	9.57899e-08	19.9978	2.61857
MSTRG.12484	LOC100570891	uncharacterized LOC100570891	39.5894	35.0242	54.8238	358.122	351.651	290.909	2.46575e-15	4.39545	9.81394e-20	21.0457	14.6081
MSTRG.12597	LOC100575306	possible pseudogene or miscRNA, No KEGG entry	7.50117	30.5984	20.3697	132.426	138.894	171.277	2.42771e-05	4.42003	9.66251e-10	21.4072	4.6148
MSTRG.21079	LOC100166445	#N/A	10.944	19.8034	13.229	115.096	104.243	124.309	2.66662e-10	4.45414	1.06134e-14	21.9194	9.57404
MSTRG.7950	LOC100164778	uncharacterized protein KIAA0562-like	94.4347	75.0354	111.076	883.234	689.493	675.495	5.53949e-22	4.46575	2.20477e-26	22.0966	21.2565
MSTRG.16815	LOC100160593	prohormone-4-like	9.87195	33.9087	36.6445	240.413	228.701	185.145	1.93755e-06	4.50004	7.71162e-11	22.628	5.71275
MSTRG.953	#N/A	#N/A	8.581	23.0401	20.0518	113.859	138.639	157.986	1.40143e-07	4.50165	5.57784e-12	22.6534	6.85343
MSTRG.10373	LOC100163287	uncharacterized LOC100163287	20.1912	57.7317	104.884	470.105	527.063	531.087	8.23265e-05	4.53577	3.27668e-09	23.1954	4.08446
MSTRG.7412	#N/A	#N/A	30.19	16.5971	8.26661	146.03	153.365	147.983	1.67694e-07	4.55178	6.67438e-12	23.4543	6.77548
MSTRG.21481	#N/A	#N/A	24.5632	20.9194	13.1459	149.663	111.005	225.107	4.55177e-08	4.56674	1.81165e-12	23.6987	7.34182
MSTRG.8148	LOC100575319	uncharacterized LOC100575319	12.0705	8.98602	7.15166	43.9908	95.4661	97.4377	0.000110525	4.60971	4.399e-09	24.4152	3.95654
MSTRG.1575	#N/A	#N/A	87.5832	94.4845	104.943	833.628	840.09	801.378	7.22967e-34	4.61997	2.87748e-38	24.5896	33.1409
MSTRG.2089	#N/A	#N/A	9.62643	5.71965	8.03319	44.8696	71.1735	87.161	4.63811e-05	4.63221	1.84602e-09	24.799	4.33366
MSTRG.25330	#N/A	#N/A	10.8685	7.92398	16.6221	90.8133	136.373	77.386	8.13492e-07	4.649	3.23778e-11	25.0894	6.08965
MSTRG.19730	#N/A	#N/A	5.17856	27.3096	7.01	94.4123	106.27	131.279	0.00380987	4.65479	1.51637e-07	25.1902	2.41909
MSTRG.16242	LOC100569971	uncharacterized LOC100569971	6.38345	14.4247	20.6058	136.915	115.406	107.903	6.23441e-07	4.65953	2.48136e-11	25.2732	6.2052
MSTRG.11876	LOC100162722	uncharacterized LOC100162722	103.574	142.028	97.6694	396.537	1838.88	784.274	2.28476e-05	4.67031	9.09356e-10	25.4626	4.64116
MSTRG.10609	LOC100163958	cationic amino acid transporter 4-like	22.476	44.752	59.8452	472.081	295.812	354.84	6.70976e-10	4.6712	2.67055e-14	25.4783	9.17329
MSTRG.8336	#N/A	#N/A	10.671	7.86251	3.07262	56.2693	59.8573	74.0007	1.67276e-05	4.69104	6.65776e-10	25.8312	4.77657
MSTRG.10261	#N/A	#N/A	9.64133	5.7309	10.4332	43.9946	106.037	77.9869	0.000194326	4.69615	7.73438e-09	25.9228	3.71147
MSTRG.13901	#N/A	#N/A	45.3383	72.8658	96.3402	675.313	567.157	694.939	8.91458e-17	4.70219	3.54809e-21	26.0316	16.0499
MSTRG.24998	LOC100571023	uncharacterized LOC100571023	5.00462	7.84859	7.79278	43.5618	55.3645	75.1846	3.806e-05	4.72117	1.51482e-09	26.3763	4.41953
MSTRG.4491	#N/A	#N/A	12.0045	6.81247	5.8182	42.2024	94.3043	77.2985	0.000204367	4.74316	8.13401e-09	26.7815	3.68959
MSTRG.2092	#N/A	#N/A	3.89447	3.52703	10.2826	42.2371	44.9866	69.4119	0.00338603	4.74431	1.34767e-07	26.8027	2.47031
MSTRG.9293	LOC100162553	alpha-tubulin N-acetyltransferase-like	16.7568	62.0426	70.7715	478.181	456.549	440.047	8.65068e-07	4.75266	3.44306e-11	26.9583	6.06295
MSTRG.17208	#N/A	#N/A	2.8567	10.03	8.28742	70.452	56.8654	63.8036	1.53891e-05	4.80224	6.12501e-10	27.9009	4.81279
MSTRG.3239	#N/A	#N/A	20.1761	47.9593	21.9293	299.382	294.015	275.159	1.4778e-13	4.8796	5.88177e-18	29.4379	12.8304
MSTRG.10257	#N/A	#N/A	4.98967	5.67626	5.42422	47.7602	33.1213	67.9329	0.000335559	4.89275	1.33556e-08	29.7074	3.47423
MSTRG.18962	#N/A	#N/A	2.91376	16.5959	24.1468	117.232	157.579	151.911	0.00103971	4.91314	4.13816e-08	30.1302	2.98309
MSTRG.17827	#N/A	#N/A	61.3345	126.911	148.864	1169.52	1156.26	1134.21	1.11014e-19	4.96964	4.41847e-24	31.3336	18.9546
MSTRG.21736	#N/A	#N/A	11.0127	9.05444	37.8008	184.608	220.384	195.278	3.08892e-05	4.98503	1.22942e-09	31.6696	4.51019
MSTRG.10365	#N/A	#N/A	6.29008	10.0603	8.17431	76.7673	80.5659	93.8022	3.07178e-10	5.08191	1.2226e-14	33.8694	9.51261
MSTRG.5924	#N/A	#N/A	6.31262	6.81391	8.27059	72.0969	87.9063	60.2002	1.6338e-08	5.09527	6.50267e-13	34.1844	7.7868
MSTRG.10811	LOC100575343	uncharacterized LOC100575343	6.36429	11.1557	8.38317	121.695	60.8422	89.3243	1.50741e-07	5.1495	5.99965e-12	35.494	6.82177
MSTRG.6590	#N/A	#N/A	6.33077	15.4594	4.58932	110.588	75.7381	91.5447	3.05141e-07	5.19709	1.21449e-11	36.6843	6.5155
MSTRG.17433	LOC100159502	uncharacterized LOC100159502	9.87819	42.5879	41.5075	428.945	369.873	292.284	3.07122e-08	5.24508	1.22238e-12	37.925	7.51269
MSTRG.17491	#N/A	#N/A	6.36713	11.1332	3.46839	76.1712	53.6334	96.3504	2.24792e-06	5.27108	8.94694e-11	38.6146	5.64822
MSTRG.13765	#N/A	#N/A	7.31297	4.63252	6.71034	69.2051	53.9444	80.3028	2.10085e-08	5.28515	8.3616e-13	38.9932	7.6776
MSTRG.12572	#N/A	#N/A	0.426584	10.0073	5.63242	64.2162	67.9551	47.2154	0.00257529	5.28924	1.02499e-07	39.1039	2.58917
MSTRG.2922	#N/A	#N/A	2.86963	17.6417	10.6487	92.8845	104.718	155.645	8.67712e-06	5.29968	3.45358e-10	39.3879	5.06162
MSTRG.13224	#N/A	#N/A	0.490874	6.81874	11.8545	88.3322	93.0758	56.7006	0.00569152	5.38981	2.26528e-07	41.9272	2.24477
MSTRG.21081	LOC100164141	muscarinic acetylcholine receptor DM1-like	12.1684	10.1474	43.9247	328.417	289.382	218.053	6.57836e-06	5.39686	2.61825e-10	42.1325	5.18188
MSTRG.24249	#N/A	#N/A	4.97198	2.42237	4.21022	29.755	36.5619	69.8933	0.00146452	5.39788	5.82893e-08	42.1624	2.8343
MSTRG.21828	LOC100160713	uncharacterized LOC100160713	12.0949	5.78604	19.273	144.128	154.698	162.776	6.69448e-12	5.3995	2.66447e-16	42.2097	11.1743
MSTRG.12890	LOC100571266	uncharacterized LOC100571266	0.513964	10.0446	7.08287	96.9772	60.6437	58.319	0.0012543	5.41478	4.99222e-08	42.6589	2.9016
MSTRG.4475	#N/A	#N/A	8.59494	0.273451	9.4768	66.6458	97.551	68.3112	0.000295678	5.44732	1.17683e-08	43.6321	3.52918
MSTRG.10339	#N/A	#N/A	0.575351	14.4179	12.0807	130.62	94.2302	124.869	0.000450298	5.51349	1.79223e-08	45.6799	3.3465
MSTRG.2958	#N/A	#N/A	8.59634	10.0931	8.18695	95.638	116.315	138.731	3.26786e-14	5.5952	1.30064e-18	48.3419	13.4857
MSTRG.4218	LOC100572246	possible pseudogene or miscRNA, No KEGG entry	12.1538	16.6315	18.2405	239.318	247.528	175.941	1.72086e-19	5.68031	6.8492e-24	51.2794	18.7643
MSTRG.1807	LOC100573675	uncharacterized LOC100573675	6.27444	0.266319	9.36743	73.7656	82.4084	65.9036	1.08095e-05	5.73829	4.3023e-10	53.3823	4.96619
MSTRG.6440	#N/A	#N/A	35.0228	12.3182	25.5946	395.478	337.215	351.438	3.31035e-18	5.74547	1.31755e-22	53.6486	17.4801
MSTRG.10349	#N/A	#N/A	0.52986	7.92917	13.1605	103.228	125.515	96.8092	2.20869e-05	5.82455	8.7908e-10	56.6714	4.65587
MSTRG.8243	LOC100162863	possible pseudogene or miscRNA, No KEGG entry	2.71079	0.207407	5.47321	38.5191	46.2474	37.648	0.000326034	5.88796	1.29765e-08	59.218	3.48674
MSTRG.20616	LOC100159695	tryptophan 2,3-dioxygenase-like	0.581404	13.3556	12.0767	136.79	157.6	123.906	2.4017e-06	5.96873	9.55902e-11	62.6275	5.61948
MSTRG.21482	LOC100568649	uncharacterized LOC100568649	6.32266	4.62469	0.856573	83.8905	40.761	43.0308	0.000316768	6.03511	1.26077e-08	65.5768	3.49926
MSTRG.13676	#N/A	#N/A	0.565171	9.03387	15.6769	154.721	139.415	143.839	1.32543e-05	6.06858	5.27533e-10	67.1156	4.87764
MSTRG.10576	#N/A	#N/A	0.466251	4.62148	5.76641	66.3598	46.9865	57.7607	9.77529e-07	6.09018	3.89066e-11	68.1284	6.00987
MSTRG.20376	LOC100169085	vesicular GABA transporter-like	0.464998	6.8034	5.724	94.614	77.6295	41.5493	5.40401e-05	6.14159	2.15085e-09	70.5997	4.26728
MSTRG.1785	#N/A	#N/A	5.2161	0.288466	8.39462	93.5311	94.4918	83.93	5.52315e-10	6.47907	2.19827e-14	89.2062	9.25781
MSTRG.9908	#N/A	#N/A	0.352803	5.64698	0.482648	42.6694	40.5004	40.4108	0.000802024	6.55968	3.19214e-08	94.332	3.09581
MSTRG.5274	LOC100570227	intraflagellar transport protein 46 homolog	0.377523	4.55112	0.575014	26.6685	37.5573	36.5708	0.00557606	6.5687	2.21933e-07	94.9238	2.25367
MSTRG.10572	LOC100168829	regulator of G-protein signaling 17-like	7.58258	23.1432	26.8544	480.662	432.06	380.773	1.17888e-21	6.61789	4.69205e-26	98.216	20.9285
MSTRG.3115	#N/A	#N/A	0.376288	5.65949	0.528169	34.1356	44.258	54.8677	0.000980711	6.71778	3.90333e-08	105.257	3.00846
MSTRG.2913	#N/A	#N/A	0.373438	6.75742	0.491696	43.3218	39.4766	78.7462	0.00366105	6.76638	1.45713e-07	108.864	2.43639
MSTRG.9209	#N/A	#N/A	6.37667	5.78125	5.89339	124.185	133.875	169.8	1.2431e-20	6.83662	4.94767e-25	114.295	19.9055
MSTRG.12702	#N/A	#N/A	0.470746	0.272359	8.15121	101.002	59.0793	88.4971	0.000170903	7.10739	6.80213e-09	137.892	3.76725
MSTRG.504	#N/A	#N/A	4.97832	0.211277	0.464056	56.0249	48.0624	28.5492	0.000226057	7.14255	8.99731e-09	141.293	3.64578
MSTRG.6927	#N/A	#N/A	0.43364	0.236688	5.68242	42.2258	36.9829	84.3549	0.000684044	7.15689	2.72256e-08	142.705	3.16492
MSTRG.18987	#N/A	#N/A	0.442588	0.261904	6.86253	80.9282	93.6794	49.8367	8.58931e-05	7.15871	3.41863e-09	142.885	4.06604
MSTRG.17519	Cprr1-5	RR1 cuticle protein 5	20.1594	15.5622	82.98	1313.69	1392.47	843.274	1.45174e-09	7.18161	5.77806e-14	145.171	8.83811
MSTRG.21740	#N/A	#N/A	5.27774	9.06663	20.7241	312.444	353.703	384.042	5.17574e-20	7.23987	2.06e-24	151.154	19.286
MSTRG.5929	LOC100570569	probable 4-hydroxy-2-oxoglutarate aldolase, mitochondrial-like	0.480134	0.208283	3.39537	28.0572	30.8408	50.4323	0.000430943	7.27285	1.7152e-08	154.649	3.36558
MSTRG.21729	#N/A	#N/A	2.95391	0.338636	15.8132	187.213	223.081	179.421	2.94215e-05	7.28383	1.171e-09	155.83	4.53134
MSTRG.3124	#N/A	#N/A	0.318557	0.19852	2.95914	28.3719	40.236	50.7956	6.18719e-05	7.44992	2.46256e-09	174.843	4.20851
MSTRG.18535	#N/A	#N/A	0.301398	3.49011	0.356364	35.4117	39.7661	53.7565	2.32347e-06	7.62624	9.24765e-11	197.573	5.63386
MSTRG.9221	LOC100168355	#N/A	5.09529	0.239162	0.647663	38.9675	52.2313	77.0325	2.22357e-06	7.63195	8.85004e-11	198.357	5.65295
MSTRG.21744	#N/A	#N/A	0.371639	2.38393	0.577632	34.7505	32.6998	24.7658	0.000122498	7.65247	4.87554e-09	201.198	3.91187
MSTRG.7385	#N/A	#N/A	5.12785	0.25294	0.696925	43.3989	70.266	80.3591	3.45133e-08	7.93357	1.37366e-12	244.48	7.46201
MSTRG.19241	#N/A	#N/A	2.74083	0.200566	0.577194	34.6946	43.2114	34.718	1.07039e-06	8.05033	4.26028e-11	265.088	5.97046
MSTRG.3108	#N/A	#N/A	0.45243	4.63624	0.649586	67.6804	52.8999	89.6066	7.15875e-10	8.11045	2.84925e-14	276.368	9.14516
MSTRG.19952	LOC100168346	troponin C, isoform 1-like	79.5821	36.1089	23.1214	630.402	4618.46	1353.5	4.37327e-08	8.2062	1.7406e-12	295.333	7.35919
MSTRG.818	#N/A	#N/A	0.522556	0.258298	3.40493	66.0168	60.4533	69.0114	5.97918e-13	8.49245	2.37977e-17	360.148	12.2234
MSTRG.17498	#N/A	#N/A	0.513058	5.75824	0.746659	95.8278	117.322	106.017	1.23267e-16	8.5465	4.90615e-21	373.896	15.9092
MSTRG.20678	LOC100160859	glutathione S-transferase-like	7.55018	0.324856	0.922809	154.813	180.42	139.727	8.54905e-22	8.71641	3.40261e-26	420.63	21.0681
MSTRG.9913	#N/A	#N/A	2.76518	0.23977	0.555812	42.7879	68.4494	68.3265	5.47452e-11	9.04424	2.17891e-15	527.944	10.2617
MSTRG.1884	#N/A	#N/A	0.345793	1.32639	0.454439	38.7557	57.2933	41.3903	1.27983e-09	9.61549	5.09385e-14	784.422	8.89285
MSTRG.25220	#N/A	#N/A	0.354777	0.223113	1.78392	23.9248	42.2361	90.0161	4.23548e-06	9.89929	1.68576e-10	954.956	5.3731
MSTRG.25329	#N/A	#N/A	0.315128	0.145832	0.502964	14.9607	22.5577	24.9962	0.00266215	10.6706	1.05956e-07	1629.95	2.57477
MSTRG.7393	#N/A	#N/A	0.263238	0.141143	0.377397	20.411	22.2865	20.6454	0.000740933	10.7035	2.94899e-08	1667.54	3.13022
MSTRG.12019	LOC100159578	dynein heavy chain 7, axonemal-like	0.340938	0.149236	0.564396	14.7674	20.6855	27.6174	0.00304025	10.7043	1.21005e-07	1668.43	2.51709
MSTRG.25400	#N/A	#N/A	0.225015	0.140649	0.281258	15.0182	16.8128	34.809	0.00720531	10.8013	2.86778e-07	1784.5	2.14235
MSTRG.11306	#N/A	#N/A	0.278394	0.150746	0.397605	18.6281	13.8276	38.1186	0.00735773	10.9231	2.92845e-07	1941.76	2.13326
MSTRG.17726	LOC100168180	glutamate receptor, ionotropic kainate 2-like	0.386531	0.166404	0.651583	28.0003	23.5729	22.8867	5.10835e-05	11.0331	2.03317e-09	2095.5	4.29172
MSTRG.20687	LOC100165591	dynein light chain 4, axonemal-like	0.310466	0.157938	0.466625	24.0417	17.704	32.3732	0.000261967	11.0354	1.04265e-08	2098.83	3.58175
MSTRG.4544	LOC107883933	#N/A	0.272666	0.15748	0.369843	40.5322	23.9284	13.2633	0.00250769	11.115	9.98085e-08	2217.92	2.60073
MSTRG.21279	LOC107884328	#N/A	0.260934	0.159123	0.33677	33.2136	35.964	11.4694	0.0024985	11.1884	9.94427e-08	2333.64	2.60232
MSTRG.11810	LOC100162922	leucine-rich repeat-containing protein 49-like	0.332118	0.168238	0.502962	22.2074	33.1682	26.7613	1.51093e-05	11.2402	6.01363e-10	2419.03	4.82076
MSTRG.5529	LOC107882569	#N/A	0.277022	0.162986	0.370385	45.5588	12.2207	25.2132	0.00340747	11.2488	1.35621e-07	2433.54	2.46757
MSTRG.7025	#N/A	#N/A	0.332421	0.169664	0.500945	16.5363	43.9363	23.1055	0.000579551	11.2609	2.30667e-08	2454.02	3.23691
MSTRG.1890	#N/A	#N/A	0.347373	0.175925	0.527922	25.3202	32.1687	31.2577	1.548e-06	11.4093	6.16118e-11	2719.83	5.81023
MSTRG.16685	#N/A	#N/A	0.312871	0.172905	0.44359	29.8896	31.8161	27.7852	7.59306e-07	11.4324	3.02211e-11	2763.75	6.11958
MSTRG.12130	LOC100161829	ninjurin-1-like	0.391213	0.189101	0.618307	30.486	30.0496	38.304	1.11609e-07	11.6502	4.44214e-12	3214.02	6.9523
MSTRG.8001	LOC100572495	52 kDa repressor of the inhibitor of the protein kinase-like	0.299357	0.184263	0.386891	27.7267	34.611	42.6344	7.37139e-08	11.7689	2.93389e-12	3489.72	7.13245
MSTRG.10331	#N/A	#N/A	0.364481	0.197341	0.531055	27.6783	44.3559	41.2251	2.08456e-08	11.9346	8.29675e-13	3914.44	7.68099
MSTRG.18970	#N/A	#N/A	0.378485	0.215791	0.532287	43.0566	34.3932	62.1625	6.15858e-10	12.3442	2.45118e-14	5199.68	9.21052
MSTRG.11291	#N/A	#N/A	0.33164	0.214031	0.413526	46.5635	36.7712	61.7596	5.18821e-11	12.4445	2.06496e-15	5574.18	10.285
MSTRG.227	LOC115033266	#N/A	0.405586	0.22555	0.585251	53.1382	63.3885	35.5297	3.30861e-11	12.5356	1.31686e-15	5937.38	10.4804
MSTRG.2929	LOC100574503	coiled-coil domain-containing protein 39-like	0.393687	0.225224	0.554312	44.4764	55.4732	53.8151	3.14264e-13	12.5639	1.2508e-17	6054.77	12.5027
MSTRG.18998	#N/A	#N/A	0.381836	0.227675	0.518375	50.4706	48.3511	62.1555	9.83523e-14	12.6562	3.91452e-18	6455.04	13.0072
MSTRG.3117	#N/A	#N/A	0.401263	0.233638	0.558262	49.2807	74.2248	45.5685	9.48414e-13	12.7629	3.77478e-17	6950.31	12.023
MSTRG.5522	#N/A	#N/A	0.319093	0.22708	0.356938	88.4424	4.79727	80.4442	0.00411003	12.8242	1.63583e-07	7252.35	2.38615
MSTRG.16464	LOC100574308	uncharacterized LOC100574308	0.399882	0.237283	0.547663	70.5412	60.351	46.496	3.12251e-14	12.8485	1.24279e-18	7375.4	13.5055
MSTRG.2119	LOC103310313	#N/A	0.387424	0.236395	0.51651	72.5712	75.4838	30.1957	2.33551e-10	12.8688	9.29554e-15	7479.96	9.63162
MSTRG.9665	LOC100161503	sodium- and chloride-dependent transporter XTRP3B-like	0.563086	0.292695	0.88575	143.279	78.7497	78.5384	1.26661e-18	13.9673	5.04123e-23	16017	17.8974
MSTRG.17195	LOC100166445	#N/A	0.52441	0.290734	0.782015	116.686	111.318	80.6941	1.96049e-23	14.0304	7.80294e-28	16733.4	22.7076
MSTRG.2016	LOC100166302	tubulin polyglutamylase TTLL4-like	0.532381	0.294625	0.796623	54.4415	187.358	81.5149	9.60956e-13	14.1186	3.8247e-17	17787.7	12.0173

## Sheet: DEGs_4vsYA_sequential
gene_ID	LOC#	gene name	F1_4	F2_4	F3_4	F1_YA	F2_YA	F3_YA	padj	log2FoldChange	pvalue	foldChange	log10padj
MSTRG.5522	#N/A	#N/A	87.9042	4.89509	81.039	0.0789719	0.471483	0	0.00806172	-12.7885	3.20865e-07	0.000141348	2.09357
MSTRG.2637	LOC115034020	#N/A	23.1468	23.8444	66.974	0.0651035	0.605137	0	0.000159971	-11.8927	6.367e-09	0.000262984	3.79596
MSTRG.22653	#N/A	#N/A	341.291	231.51	322.189	0.817283	19.4363	16.9917	2.67489e-05	-6.84216	1.06463e-09	0.00871575	4.57269
MSTRG.11829	LOC100160808	cytochrome P450 4C1-like	767.783	707.744	957.014	77.1768	63.3213	67.0254	1.7761e-23	-5.16578	7.06905e-28	0.0278577	22.7505
MSTRG.9146	#N/A	#N/A	115.077	98.0071	102.133	12.5177	11.9237	7.77819	2.98669e-08	-4.91393	1.18873e-12	0.0331711	7.52481
MSTRG.13166	LOC100166788	putative fatty acyl-CoA reductase CG5065-like	3912.69	4274.97	5301.13	781.486	261.673	394.688	2.03965e-10	-4.68482	8.11803e-15	0.0388801	9.69044
MSTRG.9265	LOC100572452	uncharacterized LOC100572452	59.7673	44.9684	51.3869	8.23047	7.05779	3.50198	0.000915234	-4.65816	3.64272e-08	0.0396054	3.03847
MSTRG.953	#N/A	#N/A	113.068	140.162	159.277	11.0229	16.6134	19.0897	7.877e-08	-4.61778	3.13512e-12	0.0407296	7.10364
MSTRG.14563	#N/A	#N/A	164.337	168.471	225.583	20.8799	16.8437	42.8815	0.000163809	-4.09651	6.51974e-09	0.0584557	3.78566
MSTRG.7634	LOC100164760	uncharacterized LOC100164760	2068.89	1420.6	1571.45	297.615	137.49	314.937	1.02548e-08	-4.00142	4.08151e-13	0.0624387	7.98907
MSTRG.9687	LOC100159914	cuticular protein-like	763.071	488.197	616.556	83.0018	81.5686	121.331	6.98314e-10	-3.95332	2.77936e-14	0.0645553	9.15595
MSTRG.13172	LOC100575819	putative fatty acyl-CoA reductase CG5065-like	966.06	1235.27	1445.35	237.632	153.388	173.968	5.18574e-13	-3.92068	2.06398e-17	0.0660324	12.2852
MSTRG.17000	LOC100167777	cytochrome P450 4C1-like	1057.36	1375.5	1401.71	274.208	125.394	201.969	2.38582e-09	-3.89017	9.49579e-14	0.067444	8.62236
MSTRG.12350	LOC100570622	uncharacterized LOC100570622	137.498	99.5529	117.518	24.0113	27.8371	21.2555	0.000350914	-3.3763	1.39667e-08	0.0963011	3.4548
MSTRG.18350	LOC100168039	serpin B11-like	19975.6	17091.4	28746.2	5480.66	5123.56	4520.84	4.36448e-14	-3.1042	1.73711e-18	0.11629	13.3601
MSTRG.3015	LOC100573039	calcineurin-binding protein cabin-1-like	2981.39	2640.38	2670.36	707.78	895.306	866.151	7.05882e-13	-2.56809	2.80948e-17	0.168627	12.1513
MSTRG.4961	LOC100164777	fatty acid synthase-like	6978.21	7463.18	8149.13	2917.72	1809.71	2148.33	2.59761e-08	-2.50933	1.03388e-12	0.175637	7.58543
MSTRG.577	LOC100165431	estradiol 17-beta-dehydrogenase 12-B-like	1281.27	1661.86	1503.97	605.156	710.593	482.075	0.00221498	-1.93619	8.81586e-08	0.261306	2.65463
MSTRG.11382	LOC100164885	possible pseudogene or miscRNA, No KEGG entry	10228.4	12145.9	17656.4	5594.2	5233.93	5742.72	0.0019814	-1.87645	7.88618e-08	0.272352	2.70303
MSTRG.91	LOC100162552	filamin-A-like	3530.29	3367.57	3190.34	6631.26	6655.86	6591.76	0.00297442	1.36949	1.18385e-07	2.58379	2.5266
MSTRG.15864	LOC100162324	peptidyl-prolyl cis-trans isomerase FKBP2-like	2070.93	1925.02	2082.23	4121.54	4371.47	3635.12	0.00906985	1.39211	3.60989e-07	2.62461	2.0424
MSTRG.1074	LOC100163579	collagen alpha-5(IV) chain	10221.4	9090.14	11635.2	18617.2	22161.6	22036.2	0.00492879	1.42837	1.96171e-07	2.69142	2.30726
MSTRG.16913	LOC100162853	frizzled-2-like	1954.02	1712.67	1577.69	3807.77	4305.57	3242.14	0.0040889	1.56044	1.62742e-07	2.94943	2.38839
MSTRG.1257	LOC100165138	plasma membrane calcium-transporting ATPase 3-like	3870.33	3119.11	2639.34	8117.58	7853.04	6118.06	0.00481714	1.6837	1.91727e-07	3.21251	2.31721
MSTRG.12611	LOC100164941	uncharacterized LOC100164941	2126.81	1808.19	1614.89	3836.42	4760.55	4188.01	0.000297331	1.69007	1.18341e-08	3.22673	3.52676
MSTRG.8953	LOC100167717	innexin inx7-like	2713.13	2369.95	2439.1	5012.93	6921.88	5434.78	0.000103143	1.69115	4.10518e-09	3.22915	3.98656
MSTRG.6749	LOC100160310	titin-like	5391.36	7116.46	6890.45	15026.8	17010.1	12930.5	0.000127857	1.70193	5.08884e-09	3.25336	3.89328
MSTRG.9556	LOC100162939	phospholipase B1, membrane-associated-like	696.261	790.908	651.947	1857.54	1534.26	1568.97	0.00887607	1.71296	3.53276e-07	3.27834	2.05178
MSTRG.7858	LOC100163442	proclotting enzyme-like	2173.57	1925.08	3162.11	5827.28	5573.26	5662.19	0.00962031	1.73666	3.82898e-07	3.33262	2.01681
MSTRG.15665	LOC100164103	microtubule-actin cross-linking factor 1, isoforms 1/2/3/5-like	2046.12	1748.57	2173.05	4330.58	5642.47	4279.73	8.15955e-05	1.76179	3.24758e-09	3.39118	4.08833
MSTRG.11559	LOC100159805	uncharacterized LOC100159805	2038.49	1803.47	2145.42	4315.38	5680.45	4531.72	1.3769e-05	1.79527	5.48021e-10	3.4708	4.8611
MSTRG.20052	LOC100169166	integrin alpha-PS2-like	814.488	738.75	635.832	2020.75	1808.22	1469.93	0.00608108	1.79738	2.42033e-07	3.47589	2.21602
MSTRG.13203	LOC100160384	proton-coupled amino acid transporter 4-like	2281.95	1891.66	2105.32	4916.56	4846.19	5457.86	5.4502e-06	1.80247	2.16923e-10	3.48818	5.26359
MSTRG.9598	LOC100165611	uncharacterized LOC100165611	516.749	551.601	440.933	1376.49	1283.49	1056.73	0.00887297	1.83251	3.53153e-07	3.56156	2.05193
MSTRG.20229	LOC100165452	uncharacterized LOC100165452	771.746	725.797	685.785	1726.85	2296.04	1529.03	0.000722106	1.88992	2.87406e-08	3.70614	3.1414
MSTRG.16727	LOC100159182	sterile alpha and TIR motif-containing protein 1-like	707.335	632.999	743.333	1452.2	1710.44	2107.71	0.00228684	1.89001	9.10185e-08	3.70638	2.64076
MSTRG.1056	LOC100167464	uncharacterized LOC100167464	309.323	326.258	327.018	818.065	847.996	788.491	0.00405027	1.9041	1.61205e-07	3.74275	2.39252
MSTRG.20470	LOC100160479	uncharacterized LOC100160479	1784.12	2060.24	2128.76	5973.68	4380.21	4859.12	3.95317e-05	1.90973	1.5734e-09	3.75738	4.40305
MSTRG.22097	LOC100165178	facilitated trehalose transporter Tret1-like	1340.2	1120.18	923.541	3497.54	2759.48	2420.54	0.00206344	1.92061	8.2127e-08	3.78584	2.68541
MSTRG.17575	LOC100158946	uncharacterized LOC100158946	347.842	368.126	276.237	812.26	914.774	852.275	0.0080471	1.94436	3.20283e-07	3.84868	2.09436
MSTRG.2827	LOC100160648	uncharacterized LOC100160648	1842.66	1680.56	1383.47	4686.94	3682.6	4363.23	3.51166e-05	1.94832	1.39767e-09	3.85925	4.45449
MSTRG.4037	LOC100165786	elongation factor 1-alpha-like	7355.53	5770.98	4965.9	12574.1	20166.5	15446.6	0.000180132	1.9857	7.16943e-09	3.96055	3.74441
MSTRG.600	LOC100167165	scavenger receptor class B member 1-like	601.011	578.465	549.485	1480.66	1866.27	1276.31	0.000198655	1.99741	7.90668e-09	3.99284	3.7019
MSTRG.7875	LOC100302430	kazal-type proteinase inhibitor	2391.28	2165.66	3302.62	7284.05	8926.48	4883.14	0.00835159	2.00053	3.32401e-07	4.00148	2.07823
MSTRG.8583	LOC100571000	uncharacterized LOC100571000	338.773	359.59	325.229	944.751	1093.2	709.424	0.00859106	2.00691	3.41933e-07	4.01921	2.06595
MSTRG.11514	LOC100161615	inter-alpha (globulin) inhibitor H4-like	3110.56	2923.45	3210.9	6506.31	9598.26	8742.09	3.97006e-07	2.00836	1.58012e-11	4.02324	6.4012
MSTRG.16441	LOC100168620	putative ferric-chelate reductase 1 homolog	738.766	631.426	597.685	1729.09	2147.18	1424.87	0.000297295	2.01181	1.18326e-08	4.03288	3.52681
MSTRG.7183	LOC100163895	UDP-glucose 4-epimerase-like	704.645	670.848	778.453	1807.08	2433.05	1578.51	0.000159922	2.01543	6.36507e-09	4.04302	3.79609
MSTRG.8696	LOC100165902	facilitated trehalose transporter Tret1-2 homolog	378.521	510.398	531.725	1415.97	1440.55	1025.02	0.00411945	2.04721	1.63958e-07	4.13306	2.38516
MSTRG.10122	LOC100163867	uncharacterized LOC100163867	689.749	933.525	992.691	2105.18	2674.13	2390.35	2.9686e-05	2.05134	1.18153e-09	4.14492	4.52745
MSTRG.19000	LOC100159472	osiris 6-like	3511.95	3310.09	2716.72	8863.67	6719.66	10475.9	9.23416e-05	2.05968	3.67529e-09	4.16893	4.0346
MSTRG.9405	LOC100161012	uncharacterized LOC100161012	1942.21	1477.72	1811.68	4523.99	6747.53	3255.94	0.00670668	2.06679	2.66933e-07	4.18952	2.17349
MSTRG.2022	LOC100573761	uncharacterized LOC100573761	3231.74	2562.6	2435.5	6078.24	9364.03	7580.87	3.43771e-06	2.08939	1.36824e-10	4.2557	5.46373
MSTRG.2277	LOC100164133	GTP cyclohydrolase 1-like	724.869	779.97	793.517	1962.38	2770.17	1710.79	5.73727e-05	2.09056	2.28349e-09	4.25914	4.24129
MSTRG.9901	LOC100161162	carbonic anhydrase 13-like	976.272	901.054	948.2	1929.21	3571.31	2447.58	0.000295861	2.09524	1.17756e-08	4.27299	3.52891
MSTRG.11809	LOC100161712	uncharacterized LOC100161712	938.284	735.669	559.26	2027.62	2493.65	1743.58	0.00148802	2.09677	5.92245e-08	4.2775	2.82739
MSTRG.7948	LOC100160088	chorion peroxidase-like	337.193	261.096	286.016	798.663	995.044	695.651	0.00455391	2.10389	1.8125e-07	4.29868	2.34162
MSTRG.6876	LOC100168676	uncharacterized LOC100168676	356.421	319.477	288.784	796.312	931.157	1012.91	0.000635194	2.12956	2.52813e-08	4.37584	3.19709
MSTRG.8920	Cpap3-a2	cuticular protein analogous to peritrophins 3-A2	1372.61	1166.1	1175.33	4325.33	3396.67	2855.23	7.39096e-06	2.13797	2.94168e-10	4.40143	5.1313
MSTRG.5976	LOC100167668	uncharacterized LOC100167668	356.793	299.819	299.363	833.616	1092.32	821.412	0.000531464	2.14676	2.11528e-08	4.42833	3.27453
MSTRG.8058	LOC100160920	fatty acid synthase-like	1690.77	1899.31	1440.37	6025.21	4313.66	4095.64	1.53919e-05	2.15692	6.12612e-10	4.45962	4.81271
MSTRG.17852	LOC100163627	uncharacterized protein CG3556-like	590.314	398.304	454.377	1711.61	1378.85	1064.02	0.0069532	2.16125	2.76744e-07	4.47301	2.15782
MSTRG.19227	#N/A	#N/A	465.769	377.183	496.644	1000.98	1216.69	1667.38	0.00538483	2.17763	2.14322e-07	4.52408	2.26883
MSTRG.5249	LOC100575006	transcriptional activator GLI3-like	855.719	632.5	479.983	1705.52	2416.69	1645.29	0.00390551	2.18538	1.55443e-07	4.54848	2.40832
MSTRG.8805	LOC100158845	alpha-tocopherol transfer protein-like	464.036	545.551	490.866	1411.28	1888.97	1121.67	0.000251127	2.19688	9.99509e-09	4.58485	3.60011
MSTRG.17514	Cprr1-8	RR1 cuticle protein 8	5363.98	2804.75	4184.45	9728.96	11158	15628.7	0.00527497	2.21669	2.09949e-07	4.64824	2.27778
MSTRG.3314	LOC100574507	leucine-rich repeats and immunoglobulin-like domains protein 1-like	1102.84	1015.17	1045.75	2201.77	3819.96	3402.76	1.07068e-05	2.22	4.2614e-10	4.65894	4.97034
MSTRG.6659	LOC100169177	uncharacterized LOC100169177	596.598	638.997	451.565	1856.57	1693.43	1465.22	2.1884e-05	2.22545	8.71004e-10	4.67657	4.65987
MSTRG.20844	LOC100167229	uncharacterized LOC100167229	953.383	975.045	887.835	3058.52	3391.93	1995.15	7.59029e-06	2.23555	3.02101e-10	4.70943	5.11974
MSTRG.18356	Cpx	complexin	424.141	382.844	408.967	1555.04	1107.95	995.229	0.000490566	2.25568	1.9525e-08	4.77558	3.3093
MSTRG.8211	LOC100165137	uncharacterized LOC100165137	1018.54	980.823	807.554	3378.52	2870.75	2231.17	1.89783e-06	2.2594	7.55354e-11	4.78793	5.72174
MSTRG.9853	LOC100160152	uncharacterized protein LOC100160152	815.645	646.396	832.469	1834.08	3163.03	2007.48	9.37808e-05	2.26567	3.73257e-09	4.80877	4.02789
MSTRG.6502	LOC100162206	probable cytochrome P450 303a1-like	646.465	627.414	492.539	1835.99	1892.57	1634.48	4.37027e-07	2.26769	1.73941e-11	4.81552	6.35949
MSTRG.20753	LOC100159902	uncharacterized LOC100159902	368.905	399.05	311.836	822.995	1560.84	926.954	0.00949558	2.27508	3.77933e-07	4.84024	2.02248
MSTRG.8319	LOC100570812	uncharacterized LOC100570812	507.147	342.463	482.872	1361.39	1741.83	986.553	0.00305854	2.27936	1.21733e-07	4.85462	2.51449
MSTRG.7333	LOC100162954	uncharacterized LOC100162954	923.625	833.807	643.779	2049.35	2596.72	2693.45	1.17083e-06	2.27996	4.66003e-11	4.85665	5.9315
MSTRG.7637	LOC100160412	prickle-like protein 3-like	634.032	555.104	585.037	2140.66	1660.32	1659.8	7.81697e-07	2.30161	3.11123e-11	4.93007	6.10696
MSTRG.17275	LOC100160187	uncharacterized protein ZK1073.1-like	921.021	875.181	791.691	3396.07	2463.21	2126.18	4.42145e-06	2.30708	1.75978e-10	4.94879	5.35443
MSTRG.15897	LOC100160665	A disintegrin and metalloproteinase with thrombospondin motifs 16-like	400.692	311.498	341.252	1098.09	810.565	1340.44	0.00273952	2.31551	1.09036e-07	4.9778	2.56232
MSTRG.5221	LOC100159331	uncharacterized LOC100159331	608.499	585.383	651.856	2064	2172.86	1523.43	2.91962e-07	2.32184	1.16204e-11	4.9997	6.53467
MSTRG.12192	LOC100168886	very low-density lipoprotein receptor-like	847.555	659.657	911.806	2253.61	3216.3	2145.94	1.65247e-06	2.33358	6.57698e-11	5.04055	5.78187
MSTRG.19949	LOC100169058	amyloid beta A4 precursor protein-binding family B member 1-interacting protein-like	1502.6	1120.1	917.912	2930	5505.33	2929.05	0.00274109	2.36571	1.09098e-07	5.15408	2.56208
MSTRG.12228	LOC100162149	putative fatty acyl-CoA reductase CG5065-like	4092.05	4747.74	4120.55	10537.7	19518	11534.2	1.91353e-06	2.3668	7.61604e-11	5.15796	5.71816
MSTRG.13930	LOC100166314	uncharacterized LOC100166314	453.265	473.254	437.342	1502.85	1578.9	1268.2	5.64231e-08	2.36895	2.24569e-12	5.16566	7.24854
MSTRG.10114	LOC100164099	#N/A	487.414	462.558	379.506	1834.37	1473.88	1001.7	0.000567979	2.40568	2.26061e-08	5.29884	3.24567
MSTRG.5354	LOC100163602	receptor-type tyrosine-protein phosphatase N2-like	460.79	387.244	397.263	1798.22	1286.19	957.95	0.000951975	2.41128	3.78896e-08	5.31945	3.02137
MSTRG.21549	LOC100167523	uncharacterized LOC100167523	461.79	384.308	241.473	1437.8	1272.08	894.638	0.00804063	2.45159	3.20025e-07	5.4702	2.09471
MSTRG.5271	LOC100167736	uncharacterized LOC100167736	3998.89	2859.7	3252.56	7995.17	14336.4	11588.3	3.7707e-07	2.4651	1.50077e-11	5.52164	6.42358
MSTRG.9876	LOC100168802	thrombospondin-3-like	566.395	662.995	605.616	2716.85	1488.24	1896.1	0.000114208	2.46992	4.54559e-09	5.54012	3.9423
MSTRG.8921	Cpap3-a1	cuticular protein analogous to peritrophins 3-A1	830.226	819.98	610.867	2942.81	2573.2	2140.05	2.46994e-08	2.49769	9.83062e-13	5.64781	7.60731
MSTRG.8922	Cpap3-b	cuticular protein analogous to peritrophins 3-B	432.858	407.374	484.528	1774.13	1494.01	1224.77	4.43058e-07	2.50073	1.76341e-11	5.6597	6.35354
MSTRG.21533	LOC100161839	potassium voltage-gated channel protein eag-like	193.662	200.493	183.839	770.328	647.959	541.883	0.000123842	2.50138	4.92903e-09	5.66229	3.90713
MSTRG.16926	LOC100571674	uncharacterized LOC100571674	144.157	141.18	151.628	525.471	584.668	392.733	0.000480422	2.52065	1.91213e-08	5.73841	3.31838
MSTRG.8062	LOC100167754	solute carrier organic anion transporter family member 4C1-like	337.133	222.33	345.663	813.589	1349.87	959.897	0.000600697	2.52271	2.39083e-08	5.74661	3.22134
MSTRG.11728	LOC100165247	ABC transporter G family member 20-like	789.494	762.674	674.083	2250.38	3337.7	2096.74	1.5917e-08	2.52377	6.33511e-13	5.75083	7.79814
MSTRG.5281	LOC100164538	uncharacterized LOC100164538	5409.9	3439.27	4585.84	13744.6	11032.8	21143	0.000195217	2.52764	7.76983e-09	5.76626	3.70948
MSTRG.9579	LOC100167133	possible pseudogene or miscRNA, No KEGG entry	173.313	139.902	119.644	535.411	508.448	444.827	0.000610784	2.52829	2.43098e-08	5.76887	3.21411
MSTRG.16911	ACYPI25566	#N/A	861.004	839.204	1055.97	2158.44	4915.47	2729.99	0.000240883	2.57741	9.5874e-09	5.96867	3.61819
MSTRG.1860	LOC100165956	uncharacterized LOC100165956	326.539	278.606	227.382	1150.67	1002.94	784.716	3.27355e-05	2.58308	1.30291e-09	5.99219	4.48498
MSTRG.7206	LOC100163552	uncharacterized LOC100163552	310.683	271.884	235.228	999.845	1275.95	673.374	0.000221025	2.61867	8.79701e-09	6.14182	3.65556
MSTRG.18349	LOC100166003	serpin B10-like	949.492	861.842	837.926	3605.89	2903.8	3053.58	7.17128e-13	2.63367	2.85424e-17	6.20601	12.1444
MSTRG.4976	Cprr1-1	RR1 cuticle protein 1	2749.07	1643.12	2157.75	5848.94	10873.7	7179.51	5.01575e-06	2.63631	1.99632e-10	6.21737	5.29966
MSTRG.6974	ORF2	#N/A	2599.4	1488.19	1193.09	4958.72	7220.93	7005.95	0.000233798	2.63751	9.30539e-09	6.22256	3.63116
MSTRG.19616	Cpap3-c	cuticular protein analogous to peritrophins 3-C	1898.34	1732.33	1419.94	6262.41	7143.44	5095	1.02791e-12	2.65359	4.09117e-17	6.29229	11.988
MSTRG.21757	LOC100166472	choline transporter-like protein 2-like	474.33	662.222	602.944	1690.15	3360.34	1387.9	0.00275274	2.65796	1.09562e-07	6.31139	2.56023
MSTRG.18480	LOC100168024	uncharacterized LOC100168024	184.11	210.894	222.863	729.574	707.772	823.163	1.19108e-06	2.66404	4.74062e-11	6.33803	5.92406
MSTRG.18400	LOC100169516	potassium voltage-gated channel subfamily H member 2-like	150.826	137.787	80.4472	475.201	516.01	365.134	0.00900574	2.66526	3.58438e-07	6.34343	2.04548
MSTRG.5682	LOC100161626	uncharacterized LOC100161626	674.979	435.192	307.309	1469.1	2098.32	1672.29	0.000471393	2.66962	1.87619e-08	6.36261	3.32662
MSTRG.17515	Cprr1-7	RR1 cuticle protein 7	1017.65	699.015	862.718	2313.06	4185.28	3094.87	2.1914e-07	2.67903	8.72198e-12	6.40427	6.65928
MSTRG.12604	LOC100167472	uncharacterized LOC100167472	210.425	222.401	192.522	1044.55	557.821	694.101	0.00137952	2.68177	5.49062e-08	6.41643	2.86027
MSTRG.9695	LOC100160127	uncharacterized LOC100160127	93.5624	76.0767	123.13	286.05	436.628	364.597	0.00478429	2.68198	1.90419e-07	6.41737	2.32018
MSTRG.18001	LOC100162079	uncharacterized LOC100162079	364.336	338.554	240.578	1253.48	1395.96	862.248	1.89912e-05	2.68554	7.55867e-10	6.43322	4.72145
MSTRG.20577	LOC100161410	uncharacterized LOC100161410	261.679	215.375	182.709	855.91	1052.16	569.783	0.0003185	2.70266	1.26766e-08	6.50999	3.49689
MSTRG.8307	LOC100162489	uncharacterized LOC100162489	370.306	230.065	193.384	823.407	871.57	1264.01	0.0030915	2.70288	1.23045e-07	6.51103	2.50983
MSTRG.18147	LOC100167957	oxidized low-density lipoprotein receptor 1-like	95.0765	114.061	128.476	450.431	360.408	467.723	0.00025881	2.73349	1.03009e-08	6.65063	3.58702
MSTRG.2597	LOC100164585	uncharacterized LOC100164585	115.882	126.112	107.233	544.923	513.496	277.98	0.0059447	2.75028	2.36605e-07	6.72848	2.22587
MSTRG.1694	LOC100167365	CG31997-like	710.188	674.312	634.878	2647.61	2843.49	2277.3	4.89431e-15	2.75793	1.94799e-19	6.76427	14.3103
MSTRG.15490	LOC100575897	uncharacterized LOC100575897	86.9828	113.587	72.4124	355.771	390.585	307.687	0.000503454	2.77024	2.0038e-08	6.82221	3.29804
MSTRG.11143	LOC100575359	uncharacterized LOC100575359	273.676	319.859	265.486	1430.7	849.969	1049.59	8.02283e-06	2.79055	3.19317e-10	6.91894	5.09567
MSTRG.7653	Cp68	cuticular protein 68	1004.09	575.203	731.879	2615.71	1982.16	4359.76	0.00169311	2.79186	6.73873e-08	6.92522	2.77132
MSTRG.19697	LOC100569640	uncharacterized LOC100569640	234.771	246.609	149.807	732.26	1146.41	600.264	0.00118516	2.79215	4.71705e-08	6.92659	2.92622
MSTRG.8405	LOC100159612	tropomyosin-2-like	1569.37	3613.57	1771.45	10756.9	7840.03	8574.67	0.000369522	2.80126	1.47074e-08	6.97047	3.43236
MSTRG.7874	LOC100161742	uncharacterized LOC100161742	134.271	80.7006	132.002	466.568	466.224	434.95	0.000264646	2.81232	1.05332e-08	7.02414	3.57734
MSTRG.18398	LOC100159527	uncharacterized LOC100159527	573.925	425.929	349.16	2431.74	1953.51	952.783	0.00698991	2.8162	2.78206e-07	7.04304	2.15553
MSTRG.12901	LOC100164097	uncharacterized LOC100164097	738.364	602.478	502.286	2275.99	3517.8	1578.05	2.25316e-05	2.82511	8.9678e-10	7.08668	4.64721
MSTRG.13748	LOC100168275	myophilin-like	344.7	277.335	245.921	1470.81	952.851	1018.64	4.29272e-06	2.83295	1.70855e-10	7.12528	5.36727
MSTRG.20962	LOC103308628	#N/A	481.735	439.579	374.258	2122.34	1685.29	1392.13	4.52283e-09	2.85278	1.80013e-13	7.2239	8.34459
MSTRG.7265	LOC100163370	major facilitator superfamily domain-containing protein 6-A-like	314.769	221.685	302.125	1662	1011.46	767.668	0.000687549	2.9037	2.73651e-08	7.48342	3.1627
MSTRG.7723	LOC100160065	uncharacterized LOC100160065	437.508	368.726	270.84	1495.79	1595.51	1391.76	1.53209e-09	2.9243	6.09788e-14	7.59105	8.81471
MSTRG.9759	LOC100165870	uncharacterized LOC100165870	699.58	965.361	675.807	3334.67	4498.81	2028.3	2.31701e-06	2.93627	9.22194e-11	7.65432	5.63507
MSTRG.19209	LOC100168822	uncharacterized LOC100168822	513.42	557.446	366.082	2371.03	2120.47	1549.05	8.96708e-09	2.94635	3.56899e-13	7.70795	8.04735
MSTRG.2419	LOC100165301	proton-coupled amino acid transporter 1-like	260.42	233.368	199.683	1096.68	1165.02	671.654	1.92114e-06	2.95311	7.64634e-11	7.74415	5.71644
MSTRG.20135	LOC100160002	glucose dehydrogenase [acceptor]-like	110.24	88.5086	71.4694	387.268	494.339	266.948	0.00124012	2.96329	4.93579e-08	7.79902	2.90654
MSTRG.14979	LOC100159263	uncharacterized LOC100159263	231.546	302.988	204.979	1198.07	968.236	962.843	4.80496e-08	2.9642	1.91242e-12	7.80394	7.31831
MSTRG.15779	LOC100169417	amine sulfotransferase-like	263.072	305.172	238.126	1388.16	1078.83	987.201	4.92457e-09	2.99165	1.96003e-13	7.95386	8.30763
MSTRG.7384	LOC100161869	protein yellow-like	438.804	415.816	594.887	1627.27	3578.5	1166.75	0.00701341	3.00978	2.79141e-07	8.05442	2.15407
MSTRG.8597	LOC100165751	muscle LIM protein Mlp84B-like	1003.31	957.472	1113.71	6370.38	2550.55	4308.79	3.32146e-05	3.01344	1.32197e-09	8.07488	4.47867
MSTRG.19916	LOC100164113	cuticle protein-like	173.477	83.8525	89.2786	536.656	506.806	468.495	0.00109193	3.02412	4.346e-08	8.13485	2.9618
MSTRG.9087	LOC100163976	elongation of very long chain fatty acids protein AAEL008004-like	74.0123	132.871	86.6382	499.073	489.111	316.679	0.000662965	3.06523	2.63867e-08	8.37002	3.17851
MSTRG.18943	LOC100573471	uncharacterized LOC100573471	1422.52	1175.46	1781.77	3428.61	11300.2	5084.14	0.00404027	3.06781	1.60807e-07	8.38498	2.39359
MSTRG.14751	LOC100574390	uncharacterized LOC100574390	1381.53	1609.76	2022.04	12080.1	5740.31	4522.61	0.000635494	3.07837	2.52933e-08	8.4466	3.19689
MSTRG.2013	LOC100168237	proton-coupled amino acid transporter 4-like	433.261	442.516	303.14	2187.17	1359.63	1713.68	3.42731e-08	3.08237	1.36411e-12	8.47002	7.46505
MSTRG.15876	LOC100159647	paramyosin, long form-like	2376.66	5066.03	2578.73	16655.1	17610.6	11321.3	2.23326e-06	3.10467	8.88861e-11	8.602	5.65106
MSTRG.19713	LOC100169520	calcium-activated potassium channel slowpoke-like	219.811	160.582	148.95	1068.68	892.486	525.721	3.97071e-05	3.17672	1.58038e-09	9.04252	4.40113
MSTRG.24581	#N/A	#N/A	31.8226	17.3658	23.449	109.305	119.805	112.844	0.00523335	3.18507	2.08293e-07	9.09499	2.28122
MSTRG.5931	LOC100164771	peroxidase-like	130.065	131.334	90.207	441.683	762.096	492.63	8.06443e-06	3.21729	3.20972e-10	9.30037	5.09343
MSTRG.20920	LOC100166039	uncharacterized LOC100166039	404.901	349.257	250.34	2391.52	908.511	1559.39	0.000580194	3.25664	2.30923e-08	9.55754	3.23643
MSTRG.16305	LOC100162260	uncharacterized LOC100162260	83.3681	73.247	44.8042	327.249	301.886	359.686	4.89067e-05	3.2819	1.94654e-09	9.72636	4.31063
MSTRG.21226	LOC107882134	#N/A	107.119	122.538	145.371	434.519	1057.27	392.66	0.00548711	3.29047	2.18392e-07	9.7843	2.26066
MSTRG.14219	LOC100163145	possible pseudogene or miscRNA, No KEGG entry	157.574	236.27	146.207	1071.33	1005.01	618.992	1.63584e-06	3.30303	6.51079e-11	9.86985	5.78626
MSTRG.8038	LOC100167781	uncharacterized LOC100167781	568.356	1134.76	918.788	5378.76	3986.7	3857.82	1.11984e-09	3.33057	4.45706e-14	10.0601	8.95085
MSTRG.21857	LOC100164372	muscular protein 20	455.335	271.08	341.14	2157.47	1957.23	1344.52	1.05914e-09	3.35304	4.21548e-14	10.218	8.97505
MSTRG.597	LOC100162393	uncharacterized LOC100162393	247.265	306.645	361.607	1219.8	2747.7	797.928	0.00316619	3.36327	1.26018e-07	10.2907	2.49946
MSTRG.883	LOC100159662	uncharacterized LOC100159662	235.963	269.511	203.168	823.117	2225.44	696.96	0.00423129	3.39076	1.6841e-07	10.4886	2.37353
MSTRG.19049	LOC100161929	prolyl 4-hydroxylase subunit alpha-2-like	64.9297	67.5993	55.4483	500.055	203.818	263.634	0.00614371	3.39428	2.44526e-07	10.5143	2.21157
MSTRG.272	LOC103308338	myelin regulatory factor	132.397	99.1662	86.8241	724.746	439.85	488.436	5.02934e-06	3.40391	2.00173e-10	10.5847	5.29849
MSTRG.1767	LOC100169415	nuclear factor 1 X-type-like	113.369	160.873	72.3731	799.861	650.002	366.224	0.00183407	3.40854	7.29979e-08	10.6187	2.73658
MSTRG.6156	LOC100168153	clavesin-1-like	620.613	611.744	554.808	3236.8	4010.35	2234.82	1.02796e-15	3.41909	4.09138e-20	10.6966	14.988
MSTRG.14747	LOC100574121	uncharacterized LOC100574121	386.297	520.012	686.002	4128.44	2218.1	2023.56	1.6344e-06	3.42097	6.50508e-11	10.7106	5.78664
MSTRG.2642	LOC100159321	#N/A	68.3584	41.42	45.7414	318.918	295.002	212.931	3.83082e-05	3.43883	1.5247e-09	10.844	4.41671
MSTRG.6359	LOC100163566	uncharacterized LOC100163566	566.125	456.788	621.503	1684.45	4856.23	2385.26	5.5125e-06	3.45054	2.19403e-10	10.9324	5.25865
MSTRG.1189	LOC100165533	sodium/potassium-transporting ATPase subunit beta-2-like	43.0658	73.8598	51.8989	448.041	266.4	193.11	0.00450143	3.47039	1.79161e-07	11.0839	2.34665
MSTRG.12626	LOC100167984	ABC transporter G family member 23-like	50.6235	62.9989	48.3387	342.768	190.257	335.628	0.000146818	3.47305	5.84348e-09	11.1043	3.83322
MSTRG.14725	LOC100575855	uncharacterized LOC100575855	568.69	740.505	1090.13	6863.26	3760.48	2510.9	0.00010686	3.50302	4.25313e-09	11.3374	3.97119
MSTRG.17511	LOC100169171	cuticular protein-like	3832.22	2812.42	2844.87	20135.5	16805.7	15460.9	1.19221e-22	3.51615	4.74512e-27	11.441	21.9236
MSTRG.16344	LOC100160509	uncharacterized LOC100160509	34.0859	22.7474	24.3257	124.824	150.903	170.415	9.69266e-05	3.52964	3.85777e-09	11.5485	4.01356
MSTRG.6362	LOC100167797	NACHT and WD repeat domain-containing protein 1-like	78.6131	89.4127	60.809	491.315	572.999	226.486	0.000397436	3.54743	1.58183e-08	11.6918	3.40073
MSTRG.14748	LOC100574209	uncharacterized LOC100574209	852.901	1144.55	1299.17	10425	4446.71	3636.54	9.46123e-05	3.56103	3.76566e-09	11.8026	4.02405
MSTRG.2889	LOC100167645	uncharacterized LOC100167645	336.224	286.536	313.541	2455.37	1216.55	1658.73	9.54312e-10	3.59152	3.79826e-14	12.0546	9.02031
MSTRG.15353	LOC100162270	ATP-binding cassette sub-family G member 1-like	478.088	439.089	440.865	1958.26	4854.79	1114.26	0.00328841	3.59421	1.30882e-07	12.0772	2.48301
MSTRG.21875	#N/A	#N/A	201.462	200.005	205.913	824.764	1708.26	1012.12	8.85509e-10	3.61293	3.52441e-14	12.2349	9.05281
MSTRG.46	LOC100163607	uncharacterized LOC100163607	80.1378	52.9103	34.0889	453.394	308.575	220.489	0.00216154	3.65431	8.60315e-08	12.5909	2.66524
MSTRG.8536	LOC100160311	chaoptin-like	28.9683	33.0079	27.9522	188.446	158.428	177.663	1.19424e-06	3.65552	4.75319e-11	12.6015	5.92291
MSTRG.11542	LOC100159055	alpha-tocopherol transfer protein-like	272.147	302.792	222.745	845.72	2780.79	1164.21	0.000173411	3.65994	6.90194e-09	12.6401	3.76092
MSTRG.10627	LOC100167755	uncharacterized LOC100167755	319.632	476.199	296.62	1934.23	3270.12	1357.81	7.10181e-08	3.66879	2.82659e-12	12.718	7.14863
MSTRG.8490	LOC100163274	troponin T-like	3309.83	6260.02	3716.22	27172	40668.8	13086.7	1.53426e-05	3.69727	6.10652e-10	12.9715	4.8141
MSTRG.15669	LOC100169318	nose resistant to fluoxetine protein 6-like	92.0245	69.868	67.0027	598.222	413.993	378.88	4.76494e-08	3.7281	1.89649e-12	13.2517	7.32194
MSTRG.16613	LOC100574967	glutamate receptor, ionotropic kainate 3-like	77.2422	62.3086	40.3386	542.833	327.38	232.862	0.000577628	3.74733	2.29902e-08	13.4295	3.23835
MSTRG.9847	LOC100569094	uncharacterized LOC100569094	159.774	128.303	108.069	1217.3	786.001	449.468	2.68195e-05	3.75678	1.06744e-09	13.5178	4.57155
MSTRG.18564	LOC100166947	cAMP-specific 3',5'-cyclic phosphodiesterase-like	200.544	182.056	142.642	800.079	1914.62	627.485	8.23719e-05	3.78472	3.27848e-09	13.7821	4.08422
MSTRG.17990	LOC100168085	putative fatty acyl-CoA reductase CG5065-like	34.3168	25.2034	19.026	169.857	159.531	163.907	5.06873e-06	3.79134	2.0174e-10	13.8454	5.2951
MSTRG.18360	LOC100165895	DOMON domain-containing protein CG14681-like	96.6342	79.9736	91.0656	576.343	644.513	479.234	2.39601e-12	3.79996	9.53635e-17	13.9284	11.6205
MSTRG.16622	LOC103308562	#N/A	79.2687	88.5242	57.2209	668.298	412.081	337.794	2.93855e-06	3.80797	1.16957e-10	14.006	5.53187
MSTRG.1007	LOC100164836	pyridoxine/pyridoxamine 5'-phosphate oxidase-like	62.923	59.2783	52.8528	590.37	172.902	336.961	0.00631625	3.8139	2.51393e-07	14.0637	2.19954
MSTRG.22887	LOC100569077	uncharacterized LOC100569077	43.0878	27.3855	29.6579	256.414	287.265	99.2591	0.00608616	3.82689	2.42235e-07	14.1908	2.21566
MSTRG.11925	Spn5	serine protease inhibitor 5	133.861	79.2574	99.124	541.402	647.486	810.434	1.59925e-09	3.82907	6.36517e-14	14.2123	8.79608
MSTRG.20672	LOC103308689	#N/A	2158.24	2304.93	2269.07	10427.7	26137.1	7816.58	1.47141e-06	3.84965	5.85634e-11	14.4165	5.83227
MSTRG.12714	LOC100571263	uncharacterized LOC100571263	1403.03	2083.17	2004.86	16306.4	13901.7	5728.21	7.47999e-08	3.86166	2.97711e-12	14.537	7.1261
MSTRG.19917	LOC100160737	cuticle protein-like	209.65	328.359	196.076	1945.29	2031.2	844.52	5.43012e-07	3.8646	2.16124e-11	14.5667	6.26519
MSTRG.11161	LOC100160404	uncharacterized LOC100160404	46.8146	51.3191	69.6988	372.399	364.687	361.645	5.28954e-10	3.86884	2.10529e-14	14.6096	9.27658
MSTRG.5238	LOC100159953	uncharacterized LOC100159953	5542.68	3900.49	7913.03	28925.3	61217.9	26579.9	2.70245e-08	3.8989	1.0756e-12	14.9172	7.56824
MSTRG.8919	Cpap3-d1	cuticular protein analogous to peritrophins 3-D1	183.231	206.094	170.244	1086.34	1922.24	745.079	1.74047e-08	3.89986	6.92724e-13	14.9271	7.75933
MSTRG.19843	LOC100166650	troponin C-like	848.013	747.734	755.888	7598.51	1577.19	6254.91	0.00387849	3.90413	1.54368e-07	14.9713	2.41134
MSTRG.8136	Mf	myofilin	513.365	1048.01	533.382	3745.19	8070.94	2351.26	0.0002596	3.90634	1.03323e-08	14.9942	3.58569
MSTRG.19258	LOC100165504	acyl-CoA Delta(11) desaturase-like	120.995	147.697	105.372	878.544	466.327	1129.48	1.5274e-06	3.91317	6.07922e-11	15.0654	5.81605
MSTRG.219	LOC107883749	#N/A	81.4653	122.541	49.2014	817.912	550.937	326.259	0.000701128	3.9148	2.79056e-08	15.0824	3.1542
MSTRG.13883	ACYPI27259	#N/A	121.02	122.817	204.453	1055.07	582.303	1358.13	3.86419e-06	3.93008	1.53799e-10	15.2431	5.41294
MSTRG.10157	LOC100159803	peroxidase-like	17.5031	17.3517	16.3269	146.48	79.7251	116.648	0.000241586	3.93505	9.61537e-09	15.2956	3.61693
MSTRG.7640	LOC100160727	uncharacterized LOC100160727	61.8782	37.3953	66.1204	573.909	334.995	197.801	0.00135906	3.93706	5.40919e-08	15.317	2.86676
MSTRG.20961	LOC100161159	alpha-N-acetylgalactosaminidase-like	441.728	421.16	543.172	1896.99	6276.13	1684.37	0.000292865	3.97258	1.16563e-08	15.6988	3.53333
MSTRG.3678	#N/A	#N/A	33.0965	17.5479	36.1382	129.773	337.177	144.352	0.0057647	3.98858	2.29441e-07	15.8739	2.23922
MSTRG.18729	LOC100163038	uncharacterized LOC100163038	63.5155	54.482	67.9592	386.202	701.382	224.944	8.01719e-05	4.00887	3.19092e-09	16.0987	4.09598
MSTRG.10179	LOC100162848	CCAAT/enhancer-binding protein-like	153.904	158.162	186.327	744.051	2330.55	504.097	0.00603567	4.02141	2.40226e-07	16.2393	2.21927
MSTRG.12837	LOC100168942	TLP-PA-domain protein	22.7547	17.3375	13.6536	142.77	173.866	67.9042	0.00249515	4.03513	9.93095e-08	16.3944	2.6029
MSTRG.16851	LOC100159435	facilitated trehalose transporter Tret1-like	25.0684	13.4896	44.8738	233.833	187.819	164.97	0.000714087	4.04586	2.84214e-08	16.5167	3.14625
MSTRG.18405	LOC100167034	uncharacterized LOC100167034	165.112	220.784	180.92	1216	1949.55	917.489	5.37218e-12	4.04992	2.13818e-16	16.5634	11.2698
MSTRG.12713	LOC100571349	uncharacterized LOC100571349	282.759	420.602	434.68	4475.58	2392.75	1245.51	2.53685e-05	4.05143	1.00969e-09	16.5807	4.59571
MSTRG.3515	LOC100164905	uncharacterized LOC100164905	1188.71	2597.33	1180.44	13061.6	15302.2	7485.45	1.84096e-08	4.06117	7.32721e-13	16.693	7.73496
MSTRG.18984	LOC100159162	uncharacterized LOC100159162	23.7735	11.2667	19.9629	183.362	77.8973	123.053	0.00661348	4.06118	2.63223e-07	16.6931	2.17957
MSTRG.8900	LOC100167494	uncharacterized LOC100167494	21.2234	52.9197	42.9976	283.48	261.375	311.807	1.83994e-06	4.08801	7.32316e-11	17.0064	5.7352
MSTRG.5816	LOC100571749	uncharacterized LOC100571749	21.486	16.7199	10.1461	136.609	131.301	85.0349	0.000141336	4.11197	5.62532e-09	17.2912	3.84975
MSTRG.12550	LOC100159443	vesicular glutamate transporter 1-like	12.5795	9.88735	10.2274	85.1878	89.702	66.8137	6.18834e-05	4.12567	2.46302e-09	17.4563	4.20843
MSTRG.344	LOC100165866	possible pseudogene or miscRNA, No KEGG entry	2033.75	1170.25	2387.41	7851.55	27451.9	7154.65	0.00127105	4.13599	5.05892e-08	17.5816	2.89584
MSTRG.5440	LOC100165963	ZM-domain protein	177.915	257.115	219.184	1858.43	1946.3	1158.23	2.76541e-16	4.16884	1.10066e-20	17.9865	15.5582
MSTRG.2527	LOC100161673	putative defense protein Hdd11-like	49.0701	51.3086	52.768	295.044	717.648	167.21	0.00343154	4.17667	1.36579e-07	18.0844	2.46451
MSTRG.15748	LOC100163126	uncharacterized LOC100163126	61.8617	109.348	86.58	737.773	679.616	544.853	6.41638e-12	4.18839	2.55378e-16	18.2318	11.1927
MSTRG.12215	LOC100161342	synaptic vesicle glycoprotein 2C-like	10.9142	12.9007	11.9629	134.659	59.6398	74.9833	0.00347941	4.19127	1.38484e-07	18.2683	2.45849
MSTRG.10159	LOC100167837	peroxidase-like	71.7897	55.2239	67.0445	590.996	235.177	674.067	2.81604e-05	4.23912	1.12081e-09	18.8844	4.55036
MSTRG.15832	LOC100169280	actin	8021.7	13234.8	7234.65	72863.9	110321	42569.3	1.15169e-10	4.24642	4.58384e-15	18.9802	9.93866
MSTRG.16915	LOC100160121	uncharacterized LOC100160121	307.587	241.664	218.311	3275.31	724.037	1949.06	0.000373338	4.24965	1.48592e-08	19.0227	3.4279
MSTRG.18435	LOC100167379	#N/A	3987.48	12235.1	4391.78	41903.4	91872.1	30924.4	0.000756142	4.25487	3.00952e-08	19.0917	3.1214
MSTRG.8040	LOC100165761	uncharacterized LOC100165761	25.0053	22.7335	19.8685	164.817	264.186	100.33	6.01494e-05	4.25548	2.394e-09	19.0998	4.22077
MSTRG.11906	LOC100166678	uncharacterized LOC100166678	526.949	392.583	367.847	3051.44	3654.81	3493.02	1.35758e-30	4.26355	5.40331e-35	19.2068	29.8672
MSTRG.12716	LOC100571073	uncharacterized LOC100571073	742.553	1018.75	1945.33	9411.23	17186	3469.63	0.00357735	4.28348	1.42382e-07	19.474	2.44644
MSTRG.13007	Mlc1	myosin alkali light chain 1	1362.85	3508.15	1532.91	12563.7	32896.7	7584.5	0.0028657	4.32142	1.14058e-07	19.9929	2.54277
MSTRG.9698	LOC100165583	uncharacterized LOC100165583	453.801	534.181	395.412	4520.27	3676.48	3141.22	2.013e-28	4.33844	8.01194e-33	20.2302	27.6962
MSTRG.10672	LOC100167357	uncharacterized LOC100167357	11.4736	34.3373	29.6527	224.117	157.298	231.679	6.89893e-05	4.36082	2.74584e-09	20.5465	4.16122
MSTRG.2553	LOC100162472	putative fatty acyl-CoA reductase CG5065-like	49.1683	22.7216	27.8686	273.857	336.849	213.057	2.16727e-07	4.36646	8.62594e-12	20.627	6.66409
MSTRG.588	LOC100572854	uncharacterized LOC100572854	94.302	147.375	102.615	991.741	1571.87	357.064	0.000150422	4.38439	5.98695e-09	20.8849	3.82269
MSTRG.16348	LOC100162787	uncharacterized LOC100162787	51.4493	32.7864	34.9926	342.872	330.916	331.192	8.28516e-12	4.40216	3.29757e-16	21.1437	11.0817
MSTRG.17519	Cprr1-5	RR1 cuticle protein 5	1303.81	1407.6	850.308	12511.4	8969.77	8991.27	1.26443e-23	4.4317	5.03256e-28	21.5811	22.8981
MSTRG.21421	LOC100568675	nose resistant to fluoxetine protein 6-like	14.4823	15.0176	24.3191	92.0334	281.319	89.1344	0.00973082	4.43818	3.87296e-07	21.6783	2.01185
MSTRG.8253	LOC100165253	uncharacterized LOC100165253	4.86669	8.21652	15.535	83.3548	54.9048	99.104	0.00495876	4.44292	1.97364e-07	21.7496	2.30463
MSTRG.14717	LOC100575566	uncharacterized LOC100575566	360.364	756.588	717.751	9812.38	3134.54	2862.04	0.000243505	4.4588	9.69173e-09	21.9903	3.61349
MSTRG.3129	LOC100166119	twitchin-like	434.939	739.233	511.116	5750.88	5511.76	3745.85	3.79501e-22	4.50604	1.51045e-26	22.7224	21.4208
MSTRG.20876	LOC100160762	uncharacterized LOC100160762	25.0893	25.1271	23.4556	206.406	231.998	225.302	2.79585e-12	4.54218	1.11277e-16	23.2988	11.5535
MSTRG.5235	LOC100166722	uncharacterized LOC100166722	24.2599	7.32809	12.7654	179.322	104.069	115.513	0.000720375	4.54563	2.86716e-08	23.3545	3.14244
MSTRG.7706	LOC100164444	peroxidase-like	124.4	184.384	168.455	1081.1	2586.9	915.793	4.05982e-09	4.63577	1.61585e-13	24.8603	8.39149
MSTRG.11142	LOC100166316	arrestin homolog	31.907	25.8981	13.6585	368.235	143.43	168.54	0.000221699	4.67159	8.82384e-09	25.4853	3.65424
MSTRG.20550	LOC100160700	phosphoenolpyruvate carboxykinase [GTP]-like	1436.73	1314.21	1415.43	6096.92	30073	5010.33	0.00495016	4.67426	1.97021e-07	25.5324	2.30538
MSTRG.8088	ORF5	#N/A	364.839	241.629	455.94	2054.37	7180.22	1365.14	0.000761853	4.70107	3.03225e-08	26.0114	3.11813
MSTRG.21910	LOC100573339	uncharacterized LOC100573339	8.56769	4.32673	8.37037	78.4584	64.591	52.966	0.000210589	4.71863	8.38165e-09	26.33	3.67656
MSTRG.9631	LOC100165182	#N/A	46.1324	41.3045	51.9181	364.719	794.864	260.982	2.86071e-07	4.76154	1.13859e-11	27.1249	6.54353
MSTRG.12964	LOC100163715	uncharacterized LOC100163715	341.513	184.434	342.024	2536	4007.01	2315.71	6.05008e-18	4.77875	2.40799e-22	27.4503	17.2182
MSTRG.25361	LOC100572105	uncharacterized LOC100572105	28.28	33.8624	32.4492	385.929	209.651	371.199	4.23782e-10	4.81018	1.6867e-14	28.0549	9.37286
MSTRG.14722	LOC100574885	uncharacterized LOC100574885	18.5206	27.7923	22.6826	185.621	437.433	103.653	0.000535978	4.84292	2.13325e-08	28.6989	3.27085
MSTRG.16461	Cp53	cuticular protein 53	13.8283	2.78869	13.696	104.785	136.309	83.9203	0.000204011	4.86214	8.11983e-09	29.0836	3.69035
MSTRG.7935	LOC100164389	neurogenic locus notch homolog protein 1-like	46.0488	58.2634	27.8577	372.76	799.791	250.603	5.28394e-06	4.88904	2.10306e-10	29.6311	5.27704
MSTRG.18426	LOC100164008	sine oculis-binding protein homolog	13.8243	18.2228	10.1291	157.42	245.962	55.5938	0.00286895	4.90351	1.14187e-07	29.9297	2.54228
MSTRG.6894	LOC100159077	tubulointerstitial nephritis antigen-like	47.9245	15.048	16.3303	249.753	198.529	389.931	0.000146126	4.90807	5.81595e-09	30.0245	3.83527
MSTRG.19412	#N/A	#N/A	10.7676	11.2015	10.1175	185.792	96.2145	58.8077	0.000459787	4.91778	1.83e-08	30.2273	3.33744
MSTRG.12947	LOC100166054	protein c-ets-1-A-like	10.2325	12.9807	9.31117	91.9422	126.542	125.156	1.2057e-08	4.92753	4.79881e-13	30.4322	7.91876
MSTRG.8686	#N/A	#N/A	4.23685	13.8832	6.66804	95.9131	75.4412	88.9447	4.70691e-05	4.94651	1.8734e-09	30.8353	4.32726
MSTRG.14718	LOC100575663	uncharacterized LOC100575663	123.665	265.81	345.727	5396.44	1446.64	1296.72	0.0018358	4.98475	7.30668e-08	31.6636	2.73617
MSTRG.9686	#N/A	#N/A	4.09497	8.17947	26.2419	157.279	139.596	126.654	0.00179502	5.00491	7.14437e-08	32.1091	2.74593
MSTRG.21909	LOC100168549	uncharacterized LOC100168549	132.692	161.921	187.141	1982.38	2061.23	1427.91	1.07808e-28	5.01499	4.29087e-33	32.3341	27.9673
MSTRG.7813	Cp33	cuticular protein 33	25.7338	37.3858	37.6403	320.354	649.033	185.178	1.62608e-06	5.03255	6.47197e-11	32.7302	5.78886
MSTRG.17563	LOC100166159	hyaluronidase-like	13.8099	12.7698	14.5742	140.348	229.592	110.576	1.70783e-08	5.05202	6.79732e-13	33.1748	7.76756
MSTRG.18304	#N/A	#N/A	8.66026	5.14916	12.8658	104.285	99.7687	111.63	7.78254e-08	5.10071	3.09753e-12	34.3136	7.10888
MSTRG.7048	LOC100162290	uncharacterized LOC100162290	46.8728	29.6726	51.0186	453.437	556.893	536.249	1.75476e-17	5.15875	6.98414e-22	35.7221	16.7558
MSTRG.5152	LOC100163372	CG13024-like	12.4004	13.6446	4.82885	117.53	102.558	152.91	1.99949e-07	5.1712	7.95817e-12	36.0318	6.69908
MSTRG.12718	LOC100571007	possible pseudogene or miscRNA, No KEGG entry	44.5418	145.811	239.84	2308.24	2550.15	670.481	0.00197117	5.25446	7.84546e-08	38.1724	2.70528
MSTRG.7815	Cp37	cuticular protein 37	13.7181	25.0332	22.5269	219.044	423.932	153.94	1.716e-07	5.26134	6.82985e-12	38.3549	6.76548
MSTRG.12675	LOC100570783	uncharacterized LOC100570783	168.149	201.448	270.869	5647.55	843.615	1594.07	0.00140127	5.26636	5.57721e-08	38.4887	2.85348
MSTRG.12706	LOC100571442	uncharacterized LOC100571442	367.853	349.962	964.233	6238.65	13373	2554.95	0.000145262	5.29028	5.78156e-09	39.132	3.83785
MSTRG.7817	Cp12	cuticular protein 12	293.995	246.284	259.238	2375.18	7004.95	1309.83	8.11103e-07	5.31393	3.22827e-11	39.7789	6.09092
MSTRG.17959	LOC100573638	aminopeptidase N-like	14.496	8.86866	5.6741	195.909	97.7333	79.1264	8.0603e-05	5.31914	3.20808e-09	39.9228	4.09365
MSTRG.12728	LOC100164207	uncharacterized LOC100164207	7.10611	11.3072	8.38116	170.221	57.4302	107.764	5.28702e-05	5.33048	2.10429e-09	40.2377	4.27679
MSTRG.21419	LOC100570184	nose resistant to fluoxetine protein 6-like	4.04582	4.29304	11.9016	51.4689	141.382	73.3078	0.00180694	5.34234	7.19178e-08	40.5698	2.74306
MSTRG.21289	LOC100169317	uncharacterized LOC100169317	128.208	108.576	112.398	1831.96	1477.52	1389.82	1.5643e-34	5.37061	6.22609e-39	41.3726	33.8057
MSTRG.7836	Cp20	cuticular protein 20	15.2169	45.1825	16.3047	306.556	498.49	251.472	4.14158e-07	5.41893	1.64839e-11	42.782	6.38283
MSTRG.12917	LOC100159715	uncharacterized protein LOC100159715	60.3535	49.7499	123.074	674.448	2249.97	360.182	0.00174701	5.42657	6.95327e-08	43.0091	2.7577
MSTRG.15429	LOC100159821	long-chain-fatty-acid--CoA ligase 1-like	24.9768	93.9234	49.2031	501.222	1504.5	365.853	0.000629983	5.43956	2.50739e-08	43.398	3.20067
MSTRG.5158	LOC100167113	elongation of very long chain fatty acids protein 4-like	554.106	944.566	493.334	6140.37	16715.1	5508.43	4.71769e-11	5.45398	1.87769e-15	43.8341	10.3263
MSTRG.6191	Cp47	cuticular protein 47	110.127	274.127	154.218	3177.76	867.523	3418.23	2.66268e-06	5.46058	1.05977e-10	44.035	5.57468
MSTRG.5237	LOC100164742	uncharacterized LOC100164742	105.588	111.659	195.225	926.866	4606.33	561.949	0.00758511	5.51499	3.01895e-07	45.7276	2.12004
MSTRG.204	Cp72	cuticular protein 72	46.0442	83.7933	76.7871	850.231	1516.7	656.637	1.94896e-14	5.52442	7.75704e-19	46.0274	13.7102
MSTRG.17597	LOC100168379	collagen alpha-2(IV) chain-like	489.231	176.708	264.599	4977.85	4089.18	4497.57	1.05065e-18	5.54073	4.18169e-23	46.5508	17.9785
MSTRG.12354	Obp4	odorant-binding protein 4	52.102	57.521	59.0069	895.424	621.224	936.582	3.73623e-23	5.55471	1.48706e-27	47.0041	22.4276
MSTRG.15840	LOC107884504	#N/A	0	6.09161	7.60191	73.9069	55.0998	70.9215	0.00111266	5.64796	4.42851e-08	50.1423	2.95364
MSTRG.7437	LOC100571950	transient receptor potential protein	16.8808	3.55563	3.92967	186.291	107.708	76.2897	0.00234245	5.68126	9.32319e-08	51.3133	2.63033
MSTRG.12897	LOC100162036	CG32214-like	128.922	93.0708	195.152	1105.83	5020.68	646.197	0.00163488	5.71095	6.507e-08	52.3802	2.78651
MSTRG.17744	LOC100162573	uncharacterized protein C6orf105 homolog	35.6199	12.7019	39.4728	418.195	729.017	283.104	1.49917e-08	5.76252	5.96685e-13	54.2863	7.82415
MSTRG.12711	LOC115033895	#N/A	33.2717	49.8109	90.2421	1990.04	426.081	369.314	0.00305958	5.76966	1.21774e-07	54.5558	2.51434
MSTRG.7797	Cp14	cuticular protein 14	18.223	9.61698	18.0843	230.123	283.865	247.119	1.76744e-16	5.8339	7.03459e-21	57.04	15.7527
MSTRG.9090	#N/A	#N/A	1.46598	3.92922	4.10895	65.6936	62.1533	27.5085	0.00204367	5.85611	8.13402e-08	57.9247	2.68959
MSTRG.10176	LOC100160151	dipeptidase 1-like	5.76505	2.94523	0	64.6672	47.0414	43.404	0.00255353	5.8589	1.01633e-07	58.0369	2.59286
MSTRG.16728	LOC100161483	sterile alpha and TIR motif-containing protein 1-like	53.2087	25.1161	18.9949	556.766	629.254	519.734	2.50129e-15	5.93113	9.9554e-20	61.0167	14.6018
[truncated: 94 more rows]

## Sheet: DEGs_1vsREST_specific
gene_ID	LOC#	gene name	F1_1	F2_1	F3_1	F1_2	F1_3	F1_4	F1_YA	F2_2	F2_3	F2_4	F2_YA	F3_2	F3_3	F3_4	F3_YA	padj	log2FoldChange	pvalue	foldChange	log10padj
[truncated: 146 more rows]

[truncated: 4 more sheets: DEGs_2vsREST_specific, DEGs_3vsREST_specific, DEGs_4vsREST_specific, DEGs_YAvsREST_specific]
